# Supplementary material for: 1000 conifer genomes: Genome innovation, organisation and diversity
Source: Research Square preprint supplement (doi:10.21203/rs.3.rs-6502828/v1), 2025-05-26
Supplement: Supplementary file 1 [file 59e3c897e986d1bf5be73c98.xlsx]

## Sheet: Notes
Supplementary Data 1. Pooling of wood layer sections per tree
Using a cryotome, multiple longitudinal "sections" (between 100 and 150) were cut from each tree wood sample.
Every section was obtained from a single wood tissue layer.
For RNA extraction, some of the sections belonging to the same wood layers were pooled together into "pool samples".
Samples marked as outliers were excluded from the analysis.

## Sheet: Norway spruce
Spruce 1 (N3)					Spruce 2 (N2)					Spruce 3 (N1)
Section	Sample	Tissue	Outliers		Section	Sample	Tissue	Outliers		Section	Sample	Tissue
1		Phloem	x		1		Old Phloem			1		Old Phloem
2					2					2
3					3					3
4					4					4	1
5					5					5		Phloem
6					6	1				6
7					7		Phloem			7
8					8					8
9					9					9
10					10					10
11	1				11	2.1				11
12	2	Cambium			12					12
13	3				13					13
14	4				14					14
15	5				15					15
16	6				16	2.2				16
17	7				17					17
18	8				18					18
19	9				19					19
20	10				20					20
21		Expanding xylem			21	2.3				21
22	11				22	3	Cambium			22	2
23					23	4		x		23	3	Cambium
24					24	5		x		24	4
25	12				25	6		x		25	5
26					26	7		x		26	6
27					27	8		x		27	7
28					28	9		x		28	8
29	13				29		Expanding xylem	x		29		Expanding xylem
30		Mature xylem			30	10				30	9
31					31					31
32					32					32	10
33					33	11				33
34	14				34					34
35					35					35	11
36					36					36
37					37	12				37
38					38					38	12
39					39					39
40	15				40					40
41					41	13				41
42					42		Mature xylem			42	13
43					43					43		Mature xylem
44					44					44
45					45					45
46	16				46	14				46	14
47					47					47
48					48					48
49					49					49
50					50					50
51					51	15				51	15
52					52			x		52
53	17				53					53
54					54					54
55					55					55
56					56	16				56	16
57					57			x		57
58					58					58
59					59					59
60	18				60					60
61					61					61
62					62	17				62	17
63					63			x		63
64					64					64
65					65					65
66					66					66
67					67					67
68	19				68	18				68	18
69					69					69
70					70					70
71					71					71
72					72					72
73					73					73
74					74					74	19
75					75	19				75
76	20				76					76
77					77					77
78					78					78
79					79					79
80					80					80
81					81					81	20
82					82	20				82
83					83					83
84					84					84
85	21				85					85
86					86					86
87					87					87
88					88					88	21
89					89					89
90					90	21				90
91					91					91
92					92					92
93					93					93
94	22				94					94
95					95					95
96					96					96	22
97					97					97
98					98	22				98
99					99					99
100					100					100
101					101					101
102					102					102
103					103					103
104	23				104					104	23
105					105					105
106					106					106
107					107	23				107
108					108					108
109					109					109
110					110					110
111					111					111
112					112					112
113					113					113	24
114	24				114					114
115					115					115
116					116	24				116
117					117			x		117
118					118					118
119					119					119
120					120					120
121					121					121
122					122					122	25
123					123					123
124					124					124
125	25				125					125
126					126	25				126
127					127			x		127
128					128					128
129					129					129
130					130					130
131					131					131
132					132					132	26
133					133					133
134					134					134
135					135					135
136	26				136	26				136
137					137			x		137
138					138					138
139					139					139
140					140					140
141					141					141
142					142					142	27
143					143					143		Previous year wood
144					144					144
145					145					145
146					146	27				146
147					147		Previous year wood	x		147
148	27				148					148
149					149					149
150					150	28				150	28
151
152
153
154
155
156
157
158
159
160	28	Previous year wood

## Sheet: Scots pine
Scots pine 2 (S1)				Scots pine 4 (S2)				Scots pine 5 (S3)				Scots pine 3
Section	Sample	Tissue		Section	Sample	Tissue		Section	Sample	Tissue		Section	Sample	Tissue
1	1	Old phloem		1	1	Phloem		1	1	Phloem		1	1	Phloem
2				2				2				2
3				3				3				3
4				4				4				4
5				5				5				5
6				6				6				6
7				7				7				7
8				8				8				8
9				9				9				9	2	Cambium
10				10	2	Cambium		10				10	3
11				11	3			11				11	4
12				12	4			12				12	5
13				13	5			13				13	6
14				14	6			14				14	7
15				15	7			15	2	Cambium		15	8
16	2	Phloem		16	8			16	3			16	9
17				17	9			17	4			17	10
18				18	10	Xylem		18	5			18	11	Xylem
19				19				19	6			19
20				20	11			20	7			20	12
21				21				21	8			21
22	3	Cambium		22	12			22	9			22	13
23	4			23				23	10			23
24	5			24	13			24	11	Xylem		24	14
25	6			25				25				25
26	7			26				26	12			26
27	8			27	14			27				27	15
28	9			28				28	13			28
29	10			29				29				29
30	11	Xylem		30	15			30				30	16
31				31				31	14			31
32	12			32				32				32
33				33	16			33				33	17
34	13			34				34	15			34
35				35				35				35
36	14			36				36				36
37				37	17			37				37	18
38				38				38	16			38
39	15			39				39				39
40				40				40				40
41				41	18			41				41	19
42	16			42				42	17			42
43				43				43				43
44				44				44				44
45	17			45	19			45				45	20
46				46				46				46
47				47				47	18			47
48				48				48				48
49	18			49				49				49
50				50	20			50				50	21
51				51				51				51
52				52				52	19			52
53	19			53				53				53
54				54				54				54
55				55	21			55				55	22
56				56				56				56
57	20			57				57				57
58				58				58	20			58
59				59				59				59
60				60	22			60				60	23
61				61				61				61
62	21			62				62				62
63				63				63				63
64				64				64	21			64
65				65				65				65
66				66	23			66				66	24
67	22			67				67				67
68				68				68				68
69				69				69				69
70				70				70				70
71				71				71	22			71
72	23			72	24			72				72	25
73				73				73				73
74				74				74				74
75				75				75				75
76				76				76				76
77				77				77				77
78	24			78	25			78	23			78	26
79				79				79				79
80				80				80				80
81				81				81				81
82				82				82				82
83				83				83				83
84	25			84				84				84
85				85	26			85				85	27
86				86				86	24			86
87				87				87				87
88				88				88				88
89				89				89				89
90	26			90				90				90
91				91				91				91
92				92	27			92				92
93				93				93				93
94				94				94	25			94
95				95				95				95
96				96				96				96
97	27			97				97				97
98				98				98				98
99				99	28			99				99
100				100				100				100	28
101				101				101				101
102				102				102	26			102
103				103				103				103
104	28			104				104				104
105				105				105				105
106				106				106				106
107								107				107
108								108				108
109								109				109
110								110				110
								111	27
								112
								113
								114
								115
								116
								117
								118
								119
								120
								121
								122
								123
								124	28
								125
								126
								127
								128
