# Supplementary material for: 1000 conifer genomes: Genome innovation, organisation and diversity
Source: Research Square preprint supplement (doi:10.21203/rs.3.rs-6502828/v1), 2025-05-26
Supplement: Supplementary file 2 [file 8f8a8616ecd4a0026a110d6f.xlsx]

## Sheet: Sheet1
	gene_id	gene_length_bp	cds_count	eggnog_description	eggnog_preferred_name	interpro_description	ortholog_group	ortholog_group_expantion_contraction	dNdS_adj_pval	sum_ranks	pcadapt_top_score_gene	pcadapt_gene_rank	xpehh_top_score_gene	xpehh_gene_rank	ihs_north_top_score_gene	ihs_north_gene_rank	ihs_south_top_score_gene	ihs_south_gene_rank
0	PA_chr01_G000001	6800	7	metal-nicotianamine transporter	YSL9	OPT oligopeptide transporter protein	OG0000238	no_significant_change	1	55921	1.4042	6417	0.6169	16689	1.1754	16396	-1.0771	16419
1	PA_chr01_G000002	2221	1	At1g01500-like			OG0003953	no_significant_change	1	1163	2.7349	1163
2	PA_chr01_G000003	1589	1	At1g01500-like			OG0003953	no_significant_change	1	59543	1.2066	8048	0.591	16902	-0.9916	17633	-1.0003	16960
3	PA_chr01_G000006	2362	1	At1g01500-like			OG0003953	no_significant_change	1	49582	1.2523	7653	1.2327	12023	1.3412	15228	1.3295	14678
4	PA_chr01_G000007	1739	1	Erythronate-4-phosphate dehydrogenase family protein			OG0003953	no_significant_change	1	70763	0.7307	12473	0.1575	19907	-0.6248	19629	-0.7136	18754
5	PA_chr01_G000008	2712	1	Erythronate-4-phosphate dehydrogenase family protein			OG0003953	no_significant_change	1	62214	0.7262	12517	0.4372	18140	-1.171	16427	-1.2636	15130
6	PA_chr01_G000009	3797	1	Erythronate-4-phosphate dehydrogenase family protein			OG0003953	no_significant_change	1	43204	1.0369	9580	0.9414	14071	-4.2262	1374	0.81	18179
7	PA_chr01_G000012	2237	1	C-terminal binding protein	AN		OG0003953	no_significant_change	1	51890	1.3596	6765	0.3211	18998	2.0959	10222	-1.1497	15905
8	PA_chr01_G000013	19865	1	Erythronate-4-phosphate dehydrogenase family protein			OG0003953	no_significant_change	1	9294	1.0676	9294
9	PA_chr01_G000014	3832	4	TMV resistance protein N-like		TIR domain;NB-ARC domain	OG0000157	no_significant_change		50253	0.6399	13330	-0.9566	13954	-1.2971	15549	2.6087	7420
10	PA_chr01_G000015	4995	4	TMV resistance protein N-like		TIR domain;NB-ARC domain	OG0000157	no_significant_change		54251	0.8249	11577	0.8654	14661	-1.407	14766	1.5411	13247
11	PA_chr01_G000016	1206	1	Erythronate-4-phosphate dehydrogenase family protein			OG0003953	no_significant_change	1	68957	0.7146	12628	0.6961	16041	-0.426	20358	-0.4751	19930
12	PA_chr01_G000017	653	1	At1g01500-like			OG0003953	no_significant_change	1	9009	1.0986	9009
13	PA_chr01_G000018	1614	2	resistance protein		NB-ARC domain				2927	1.9825	2927
14	PA_chr01_G000019	57248	7	TMV resistance protein N-like		BspA type Leucine rich repeat region (6 copies);TIR domain;NB-ARC domain	OG0013353	no_significant_change	0.0169598	21855	1.058	9381	3.6774	3121	3.4635	3430	2.9356	5923
15	PA_chr01_G000020	3405	1	gag-polypeptide of LTR copia-type		gag-polypeptide of LTR copia-type;Domain of unknown function (DUF4219)	OG0003131	no_significant_change	1	11758	0.806	11758
16	PA_chr01_G000021	4596	2				OG0003597	no_significant_change	1	25861	1.2322	7832	4.6544	1570	-5.48	242	-1.1065	16217
17	PA_chr01_G000023	5398	4	TMV resistance protein N-like		BspA type Leucine rich repeat region (6 copies);TIR domain;NB-ARC domain	OG0014798	no_significant_change	0.0408148	7189	1.309	7189
18	PA_chr01_G000025	4399	4	RESISTANCE protein		BspA type Leucine rich repeat region (6 copies);TIR domain;NB-ARC domain	OG0013353	no_significant_change	1	69959	0.8151	11673	0.5552	17205	-0.4355	20327	-0.2426	20754
19	PA_chr01_G000028	1498	2	Toll - interleukin 1 - resistance		TIR domain	OG0017200	no_significant_change	1	65452	0.83	11527	0.3394	18871	-0.7548	18997	-1.1284	16057
20	PA_chr01_G000029	1022	2	TMV resistance protein N-like		TIR domain	OG0031742	no_significant_change		46845	0.9242	10627	1.7363	9376	1.7443	12408	-1.3672	14434
21	PA_chr01_G000031	565	1	S-type anion channel			OG0026017	no_significant_change		14234	0.5435	14234
22	PA_chr01_G000032	7620	2				OG0003597	no_significant_change	1	12389	0.7395	12389
23	PA_chr01_G000033	20077	6	Jacalin-like lectin domain		TIR domain;Jacalin-like lectin domain	OG0019635	no_significant_change	0.0557785	35247	0.714	12632	3.3192	3937	2.5138	7929	1.9532	10749
24	PA_chr01_G000034	3760	4	positive regulation of protein exit from endoplasmic reticulum		TIR domain;NB-ARC domain	OG0022455	no_significant_change	1	16957	0	16957
25	PA_chr01_G000035	3854	4	positive regulation of protein exit from endoplasmic reticulum		TIR domain;NB-ARC domain	OG0022455	no_significant_change	1	16957	0	16957
26	PA_chr01_G000036	3467	2	positive regulation of protein exit from endoplasmic reticulum		TIR domain;NB-ARC domain	OG0022455	no_significant_change	0	16957	0	16957
27	PA_chr01_G000037	1620	1	regulation of response to stimulus			OG0022455	no_significant_change	1	16957	0	16957
28	PA_chr01_G000038	1620	1	regulation of response to stimulus			OG0022455	no_significant_change	1	16957	0	16957
29	PA_chr01_G000039	5326	4	histone serine kinase activity		BspA type Leucine rich repeat region (6 copies);NB-ARC domain	OG0013353	no_significant_change	4.31035e-08	14428	0.5223	14428
30	PA_chr01_G000040	948	2	resistance protein		TIR domain	OG0031742	no_significant_change		57561	0.9644	10246	0.8372	14879	1.2255	16037	-1.08	16399
31	PA_chr01_G000041	37789	4	Protein of unknown function (DUF4079)		Protein of unknown function (DUF4079)	OG0008648	no_significant_change		35939	1.2178	7951	1.9187	8616	-2.1436	9933	2.1989	9439
32	PA_chr01_G000042	2220	3	TMV resistance protein N-like			OG0013764	no_significant_change	0.00465553	50380	1.9657	2989	0.6079	16753	-1.202	16205	-1.3673	14433
33	PA_chr01_G000044	7714	3	Senescence regulator		Senescence regulator	OG0003670	no_significant_change		39823	2.3331	1872	0.9777	13790	1.9158	11291	1.6002	12870
34	PA_chr01_G000047	445	1	Belongs to the peptidase A1 family		Xylanase inhibitor N-terminal	OG0016090	no_significant_change		11833	0.7978	11833
35	PA_chr01_G000048	3172	1	Pentatricopeptide repeat-containing protein		DYW family of nucleic acid deaminases;PPR repeat family;PPR repeat	OG0000000	no_significant_change		58819	0.7307	12473	0.5104	17551	1.5733	13567	1.2494	15228
36	PA_chr01_G000049	71818	12	Dihydrolipoyllysine-residue succinyltransferase component of 2-oxoglutarate dehydrogenase complex		Biotin-requiring enzyme;2-oxoacid dehydrogenases acyltransferase (catalytic domain)	OG0003860	no_significant_change		37227	0.8416	11415	2.4197	6634	-2.2324	9455	2.1408	9723
37	PA_chr01_G000050	152351	8	cellular response to molecule of fungal origin	SYK	Chitinase class I;Protein kinase domain	OG0013765	no_significant_change	0.0369269	24213	0.7658	12140	4.4487	1820	-3.2802	4174	2.9028	6079
38	PA_chr01_G000051	1488	1	Pentatricopeptide repeat-containing protein At2g20710, mitochondrial-like		PPR repeat	OG0013712	no_significant_change	0.149974	61236	0.9924	9992	0.1206	20052	-1.8083	11976	-0.6252	19216
39	PA_chr01_G000056	11367	3	Cytochrome b5		Cytochrome b5-like Heme/Steroid binding domain	OG0001139	no_significant_change	1	27980	1.743	4088	-2.2335	7353	-2.2301	9466	2.685	7073
40	PA_chr01_G000057	65844	6	Pre-mRNA-splicing factor		Suppressor of forked protein (Suf)	OG0008297	no_significant_change		13763	1.3338	6981	4.9256	1280	3.428	3558	4.1424	1944
41	PA_chr01_G000061	325466	10			Glutathione S-transferase, N-terminal domain	OG0015280	no_significant_change	0.000941112	14147	1.5916	5062	-5.0248	1187	3.7372	2505	3.0591	5393
42	PA_chr01_G000065	5514	5	regulation of auxin polar transport			OG0014652	no_significant_change	1	29061	3.0981	749	0.8738	14594	-1.9364	11156	-3.8779	2562
43	PA_chr01_G000066	390146	13			Plant specific mitochondrial import receptor subunit TOM20	OG0006031	no_significant_change	3.95239e-14	10614	1.5807	5132	4.508	1738	3.7734	2381	-4.4925	1363
44	PA_chr01_G000070	589	1				OG0031743	no_significant_change		13541	0.6173	13541
45	PA_chr01_G000077	3604	2	cyclin-U4-1-like		Cyclin	OG0000263	no_significant_change	1	32270	1.148	8571	0.9294	14156	-2.9128	5852	-3.4997	3691
46	PA_chr01_G000079	1152	3	Cyclin-dependent kinase		Protein kinase domain	OG0002001	no_significant_change	1	10023	0.9891	10023
47	PA_chr01_G000080	8659	1			BspA type Leucine rich repeat region (6 copies)	OG0000157	no_significant_change		50036	0.5768	13921	1.5845	10092	1.9305	11196	-1.3077	14827
48	PA_chr01_G000081	2156	1				OG0022456	no_significant_change	0.77844	73516	0.7124	12647	0.2258	19589	-0.3399	20606	0.2727	20674
49	PA_chr01_G000084	1158	1				OG0005319	no_significant_change	1	66089	0.4332	15212	0.3148	19041	1.6629	12948	-0.6878	18888
50	PA_chr01_G000085	724	1				OG0043653	no_significant_change		66089	0.4332	15212	0.3148	19041	1.6629	12948	-0.6878	18888
51	PA_chr01_G000086	1462	1				OG0043653	no_significant_change		15212	0.4332	15212
52	PA_chr01_G000087	2781	3	positive regulation of protein exit from endoplasmic reticulum		TIR domain;NB-ARC domain	OG0000157	no_significant_change		13130	0.6612	13130
53	PA_chr01_G000088	235369	5	2-C-methyl-D-erythritol 2,4-cyclodiphosphate synthase	ISPF	YgbB family	OG0007891	no_significant_change	1	22814	1.7941	3787	-2.0676	7989	-2.9643	5606	-3.0509	5432
54	PA_chr01_G000089	641	1	catalytic domain of ctd-like phosphatases		NLI interacting factor-like phosphatase	OG0012168	no_significant_change	1	12480	0.73	12480
55	PA_chr01_G000090	2931	1	RING-type E3 ubiquitin transferase		U-box domain	OG0000156	expanded	1	57390	1.2809	7417	0.5853	16951	1.7055	12665	0.3728	20357
56	PA_chr01_G000091	3784	1	Pentatricopeptide repeat-containing protein		DYW family of nucleic acid deaminases;PPR repeat family;PPR repeat	OG0019625	no_significant_change		52900	0.6476	13257	-1.5328	10367	1.3633	15075	1.4025	14201
57	PA_chr01_G000094	2739	1	Pentatricopeptide repeat-containing protein		DYW family of nucleic acid deaminases;PPR repeat family;PPR repeat	OG0031744	no_significant_change		48920	1.9247	3149	0.8692	14631	-0.9693	17759	1.5215	13381
58	PA_chr01_G000095	2167	1	DNA-binding domain in plant proteins such as APETALA2 and EREBPs			OG0013272	no_significant_change	1	14881	0.4715	14881
59	PA_chr01_G000097	3486	1	Pentatricopeptide repeat-containing protein		DYW family of nucleic acid deaminases;PPR repeat family;PPR repeat	OG0031745	no_significant_change		31279	2.247	2077	2.3111	7062	-1.2856	15626	2.8058	6514
60	PA_chr01_G000098	3885	1	Pentatricopeptide repeat-containing protein		DYW family of nucleic acid deaminases;PPR repeat family;PPR repeat	OG0000000	no_significant_change		33559	2.6543	1271	1.9236	8597	-1.5523	13711	-2.092	9980
61	PA_chr01_G000099	958	2	Heavy metal-associated isoprenylated plant protein		Heavy-metal-associated domain	OG0000178	no_significant_change	1	70895	0.8345	11484	0.3682	18668	-0.3195	20664	-0.4418	20079
62	PA_chr01_G000100	139874	30	DNA polymerase		DNA polymerase alpha subunit p180 N terminal;DNA Polymerase alpha zinc finger;DNA polymerase family B, exonuclease domain;DNA polymerase family B	OG0008110	no_significant_change	1	6060	2.0425	2697	-5.2871	1006	3.9365	1969	5.5102	388
63	PA_chr01_G000101	4181	1	Pentatricopeptide repeat-containing protein		DYW family of nucleic acid deaminases;Pentatricopeptide repeat domain;PPR repeat family;PPR repeat	OG0000000	no_significant_change		41634	1.602	4983	1.2387	11991	-1.3121	15432	2.2457	9228
64	PA_chr01_G000102	2388	3	positive regulation of cell-substrate adhesion		TIR domain;NB-ARC domain	OG0022457	no_significant_change	0.178707	21118	0.9089	10777	-1.9671	8404	-4.3631	1152	-4.9878	785
65	PA_chr01_G000103	2526	5	origin recognition complex	ORC6		OG0004698	no_significant_change	1	8331	1.1753	8331
66	PA_chr01_G000104	3792	2	Rop guanine nucleotide exchange factor		PRONE (Plant-specific Rop nucleotide exchanger)	OG0016222	no_significant_change	1	1943	2.3022	1943
67	PA_chr01_G000105	4295	2	positive regulation of cell-substrate adhesion		TIR domain;NB-ARC domain	OG0022457	no_significant_change	1	19504	2.4316	1678	1.7198	9444	-3.3916	3698	-3.2284	4684
68	PA_chr01_G000106	2054	2	TIR domain		Leucine rich repeat	OG0000157	no_significant_change		30746	2.4316	1678	0.7334	15728	2.3793	8656	-3.2284	4684
69	PA_chr01_G000107	1162	1				OG0020219	no_significant_change	0.272495	33912	2.4316	1678	0.5308	17392	2.1066	10158	-3.2284	4684
70	PA_chr01_G000108	61190	10	Nucleolar protein 56-like	NOP56	NOP5NT (NUC127) domain;snoRNA binding domain, fibrillarin	OG0004969	no_significant_change	0.39452	2989	3.6804	401	5.5102	861	-4.5797	887	-4.9294	840
71	PA_chr01_G000109	4678	1	DYW family of nucleic acid deaminases		DYW family of nucleic acid deaminases;PPR repeat family;PPR repeat	OG0000000	no_significant_change		35988	2.6977	1204	0.3004	19132	-2.8891	5979	2.1522	9673
72	PA_chr01_G000110	863	1	Type II intron maturase			OG0003522	no_significant_change	0.371788	2600	2.0676	2600
73	PA_chr01_G000111	333218	12	Glutaminyl-peptide		Glutamine cyclotransferase	OG0006028	no_significant_change		1988	2.9107	938	9.1073	34	4.8355	631	5.5157	385
74	PA_chr01_G000117	4563	7	Serine threonine-protein kinase		Protein kinase domain	OG0001161	no_significant_change	1	38969	0.929	10580	-0.4513	18029	3.3144	4017	2.8426	6343
75	PA_chr01_G000118	1964	1				OG0017202	no_significant_change	1	52008	0.8934	10923	-0.6644	16297	1.6259	13194	-1.8064	11594
76	PA_chr01_G000119	761	1				OG0017202	no_significant_change	0.692195	50111	1.494	5721	1.0535	13232	1.0955	16952	1.4016	14206
77	PA_chr01_G000120	3356	2				OG0003626	no_significant_change	1	45530	1.2941	7314	1.7831	9174	-1.6276	13180	-1.1558	15862
78	PA_chr01_G000121	3334	5	40s ribosomal protein		Plectin/S10 domain	OG0002660	no_significant_change	1	39534	0.9172	10696	1.4135	10994	2.0572	10442	2.6116	7402
79	PA_chr01_G000123	837	2	Cupin domain		Cupin	OG0000022	expanded	1	16957	0	16957
80	PA_chr01_G000124	332	1				OG0012999	no_significant_change	0.00901754	16957	0	16957
81	PA_chr01_G000125	35301	2	Cupin domain		Cupin	OG0000022	expanded	1	16957	0	16957
82	PA_chr01_G000126	950	2	Cupin domain		Cupin	OG0000022	expanded	1	16957	0	16957
83	PA_chr01_G000127	950	2	Cupin domain		Cupin	OG0000022	expanded	1	16957	0	16957
84	PA_chr01_G000128	22597	2	Cupin domain		Cupin	OG0000022	expanded	1	16957	0	16957
85	PA_chr01_G000130	145393	4	zinc finger			OG0009333	no_significant_change		18990	1.1589	8478	5.6058	810	-2.9939	5477	-3.351	4225
86	PA_chr01_G000132	76743	4	ribosome biogenesis protein RLP24		Ribosomal protein L24e	OG0003238	no_significant_change	1	18660	1.4248	6245	3.2293	4156	-4.1047	1608	-2.7732	6651
87	PA_chr01_G000134	17084	7	PI-PLC X domain-containing protein			OG0000785	no_significant_change	1	36295	1.4018	6437	2.2017	7464	2.0998	10196	1.7068	12198
88	PA_chr01_G000136	198749	19	,transcriptional activator		RRM in Demeter	OG0001459	no_significant_change		2716	2.1188	2410	-10.3365	13	-5.5964	197	-6.5536	96
89	PA_chr01_G000137	132441	2							12164	1.9433	3079	-4.745	1467	3.0278	5324	-3.9827	2294
90	PA_chr01_G000141	819	1							57608	1.4314	6192	-0.4655	17918	-0.9901	17642	1.1568	15856
91	PA_chr01_G000143	5151	4			Late embryogenesis abundant protein	OG0000858	no_significant_change	1	32766	1.6065	4953	2.2296	7364	2.0061	10741	2.144	9708
92	PA_chr01_G000146	2980	1	Pentatricopeptide repeat-containing protein		DYW family of nucleic acid deaminases;PPR repeat family;PPR repeat	OG0000000	no_significant_change		56845	1.2528	7648	0.7045	15970	-1.144	16618	1.0506	16609
93	PA_chr01_G000147	3155	1	Pentatricopeptide repeat-containing protein		DYW family of nucleic acid deaminases;PPR repeat family;PPR repeat	OG0000000	no_significant_change		41633	1.4408	6126	0.5715	17072	2.2567	9315	-2.2638	9120
94	PA_chr01_G000148	3278	1	Pentatricopeptide repeat-containing protein		DYW family of nucleic acid deaminases;Pentatricopeptide repeat domain;PPR repeat family;PPR repeat	OG0000000	no_significant_change		41915	1.4742	5860	0.8858	14499	-1.8559	11669	2.1091	9887
95	PA_chr01_G000149	5376	1	Pentatricopeptide repeat-containing protein		DYW family of nucleic acid deaminases;PPR repeat family;PPR repeat	OG0000000	no_significant_change		57184	0.772	12078	1.0035	13592	1.0281	17403	1.4152	14111
96	PA_chr01_G000150	1608	4	Jacalin-like lectin domain		Jacalin-like lectin domain	OG0000480	no_significant_change	1	58602	0.9112	10755	-0.4177	18285	-0.9851	17667	1.7563	11895
97	PA_chr01_G000151	974	2	Jacalin-like lectin domain		Jacalin-like lectin domain	OG0000480	no_significant_change	1	58517	0.6414	13316	-0.9298	14154	-1.1118	16839	-1.4014	14208
98	PA_chr01_G000152	3127	4	Jacalin-like lectin domain		Jacalin-like lectin domain	OG0000480	no_significant_change	1	12127	0.7671	12127
99	PA_chr01_G000153	1897	4	Pentatricopeptide repeat-containing protein		Jacalin-like lectin domain	OG0000480	no_significant_change	1	53447	1.5346	5442	0.3743	18624	-1.402	14801	1.3442	14580
100	PA_chr01_G000154	615	1	Pentatricopeptide repeat-containing protein At1g77360, mitochondrial-like			OG0015458	no_significant_change	0.0759273	7552	1.2654	7552
101	PA_chr01_G000155	5306	2	Belongs to the TRAFAC class dynamin-like GTPase superfamily. Dynamin Fzo YdjA family		Dynamin GTPase effector domain;Dynamin central region;Dynamin family	OG0000865	expanded	1	38724	1.0833	9148	2.6998	5697	1.9514	11061	1.6075	12818
102	PA_chr01_G000156	509	1	Heavy-metal-associated domain			OG0022459	no_significant_change	0.936544	13437	0.6285	13437
103	PA_chr01_G000157	14768	1	Belongs to the TRAFAC class dynamin-like GTPase superfamily. Dynamin Fzo YdjA family		Dynamin GTPase effector domain	OG0013662	no_significant_change	0.331577	45488	1.078	9197	2.2452	7315	0.8339	18573	2.0146	10403
104	PA_chr01_G000158	2968	2	Belongs to the TRAFAC class dynamin-like GTPase superfamily. Dynamin Fzo YdjA family		Dynamin GTPase effector domain;Dynamin central region;Dynamin family	OG0000865	expanded	1	58036	0.3462	15899	1.1321	12677	-1.4387	14538	-1.2948	14922
105	PA_chr01_G000159	1024	2	Belongs to the TRAFAC class dynamin-like GTPase superfamily. Dynamin Fzo YdjA family		Dynamin GTPase effector domain	OG0013662	no_significant_change	0.0837777	52876	1.1417	8631	0.4685	17895	1.4531	14438	1.7538	11912
106	PA_chr01_G000160	7047	9	Belongs to the glycosyltransferase 2 family		Cellulose synthase	OG0001215	no_significant_change		53278	1.2533	7646	0.6193	16672	-1.306	15477	1.5059	13483
107	PA_chr01_G000161	12788	5	Belongs to the glycosyltransferase 2 family		Cellulose synthase	OG0015870	no_significant_change		9500	1.162	8450	6.2895	467	-5.1046	443	-6.2448	140
108	PA_chr01_G000162	25351	9	Belongs to the glycosyltransferase 2 family		Cellulose synthase	OG0001215	no_significant_change		46221	1.3911	6519	0.4691	17889	-2.0808	10300	1.8206	11513
109	PA_chr01_G000163	681	1	Belongs to the glycosyltransferase 2 family		Cellulose synthase	OG0043654	no_significant_change		53027	0.4887	14727	-0.3878	18519	-0.5872	19781
110	PA_chr01_G000164	32866	9	Belongs to the glycosyltransferase 2 family		Cellulose synthase	OG0001215	no_significant_change		40115	1.4473	6071	1.4304	10909	1.9435	11116	1.7354	12019
111	PA_chr01_G000165	242942	7	Histidine--tRNA		Histidyl-tRNA synthetase;Anticodon binding domain;Aromatic amino acid lyase	OG0004731	no_significant_change	1	20146	1.4205	6280	-1.6818	9625	3.5413	3136	4.6932	1105
112	PA_chr01_G000168	3229	1	Pentatricopeptide repeat-containing protein		DYW family of nucleic acid deaminases;PPR repeat family;PPR repeat	OG0000000	no_significant_change		59104	1.066	9308	0.5074	17577	0.8703	18355	1.4498	13864
113	PA_chr01_G000169	621	1	Belongs to the TRAFAC class myosin-kinesin ATPase superfamily. Kinesin family			OG0018233	no_significant_change	0.0598664	8327	1.1757	8327
114	PA_chr01_G000170	6434	4	TMV resistance protein N-like		BspA type Leucine rich repeat region (6 copies);TIR domain;NB-ARC domain	OG0013000	no_significant_change	0.196369	69080	1.0459	9495	-0.2953	19165	-0.4753	20202	-0.4086	20218
115	PA_chr01_G000172	79769	3	Histidine--tRNA		Histidyl-tRNA synthetase;Anticodon binding domain	OG0004731	no_significant_change	3.17121e-09	54558	1.0094	9832	1.1175	12777	-0.6537	19493	1.6636	12456
116	PA_chr01_G000173	3216	1	Pentatricopeptide repeat-containing protein		DYW family of nucleic acid deaminases;PPR repeat family;PPR repeat	OG0000000	no_significant_change		13811	0.5889	13811
117	PA_chr01_G000174	3433	1			BspA type Leucine rich repeat region (6 copies)				7334	1.2913	7334
118	PA_chr01_G000175	2976	3	TMV resistance protein N-like		TIR domain;NB-ARC domain	OG0013000	no_significant_change	0.0254643	59755	1.2913	7334	0.6178	16683	0.9449	17905	0.865	17833
119	PA_chr01_G000176	682	1							13246	0.6489	13246
120	PA_chr01_G000177	1532	1				OG0018479	no_significant_change	1	8243	1.1848	8243
121	PA_chr01_G000181	2430	1	Belongs to the TRAFAC class dynamin-like GTPase superfamily. Dynamin Fzo YdjA family		Dynamin GTPase effector domain;Dynamin central region	OG0000865	expanded	1	9639	1.0306	9639
122	PA_chr01_G000182	2596	1	Belongs to the TRAFAC class dynamin-like GTPase superfamily. Dynamin Fzo YdjA family		Dynamin GTPase effector domain;Dynamin central region;Dynamin family	OG0000865	expanded	1	54657	0.8426	11405	0.1914	19760	-2.3914	8593	1.2975	14899
123	PA_chr01_G000183	1007	1	zinc-binding in reverse transcriptase		zinc-binding in reverse transcriptase	OG0000488	no_significant_change		48669	1.362	6744	0.9186	14239	1.7667	12254	1.2187	15432
124	PA_chr01_G000184	876	1				OG0000488	no_significant_change		47519	1.362	6744	0.7045	15970	1.7667	12254	1.6489	12551
125	PA_chr01_G000185	17771	19	Catalyzes the isomerization of citrate to isocitrate via cis-aconitate		Aconitase C-terminal domain;Aconitase family (aconitate hydratase)	OG0001302	no_significant_change	0.400898	26691	1.2322	7832	2.3459	6922	-2.8463	6198	-2.9762	5739
126	PA_chr01_G000187	545	1				OG0022460	no_significant_change	0.255707	55997	0.8439	11397	-0.5223	17457	-1.4095	14745	-1.6734	12398
127	PA_chr01_G000188	1446	1				OG0018480	no_significant_change	1	51360	0.8545	11296	-0.8999	14390	1.452	14445	-1.8724	11229
128	PA_chr01_G000189	3630	4	resistance protein		TIR domain;NB-ARC domain	OG0000157	no_significant_change		63188	0.8126	11697	0.4189	18277	-1.1181	16797	-1.0774	16417
129	PA_chr01_G000190	3954	4	TMV resistance protein N-like		TIR domain;NB-ARC domain	OG0000157	no_significant_change		28956	0.8397	11434	1.2396	11986	-3.3883	3707	-4.2113	1829
130	PA_chr01_G000192	1288	1	Benzyl alcohol		Transferase family	OG0000126	expanded	1	12908	0.685	12908
131	PA_chr01_G000194	1849	2	Benzyl alcohol		Transferase family	OG0000126	expanded	1	14109	0.5571	14109
132	PA_chr01_G000195	2095	1	Benzyl alcohol		Transferase family	OG0000126	expanded	1	14339	0.5319	14339
133	PA_chr01_G000196	721	1	Benzyl alcohol		Transferase family	OG0000126	expanded	1	70188	0.8636	11209	-0.1493	19942	-0.5246	20024	-0.6626	19013
134	PA_chr01_G000197	2209	2	Benzyl alcohol		Transferase family	OG0000126	expanded	1	62668	0.9124	10743	-0.2602	19397	-1.0694	17127	-1.2234	15401
135	PA_chr01_G000198	1914	2	Benzyl alcohol		Transferase family	OG0000126	expanded	1	69565	0.5859	13837	-0.742	15653	-0.5233	20030	-0.4491	20045
136	PA_chr01_G000200	2014	2	Benzyl alcohol		Transferase family	OG0000126	expanded	1	14226	0.5443	14226
137	PA_chr01_G000202	1616	2	Benzyl alcohol		Transferase family	OG0000126	expanded	1	14377	0.528	14377
138	PA_chr01_G000204	1821	2	Benzyl alcohol		Transferase family	OG0000126	expanded	1	12302	0.7489	12302
139	PA_chr01_G000205	4333	4	TMV resistance protein N-like		TIR domain;NB-ARC domain	OG0010966	no_significant_change	1	10338	0.9545	10338
140	PA_chr01_G000206	915	1	Removal of H(2)O(2), oxidation of toxic reductants, biosynthesis and degradation of lignin, suberization, auxin catabolism, response to environmental stresses such as wounding, pathogen attack and oxidative stress		Peroxidase	OG0005077	no_significant_change	5.45235e-11	10403	0.9475	10403
141	PA_chr01_G000207	1701	1	TMV resistance protein N-like		TIR domain	OG0026019	no_significant_change	0.823809	14481	0.5163	14481
142	PA_chr01_G000208	4344	4	TMV resistance protein N-like		TIR domain;NB-ARC domain	OG0010966	no_significant_change	1	11462	0.8368	11462
143	PA_chr01_G000210	690	1							10297	0.959	10297
144	PA_chr01_G000211	657	1				OG0031746	no_significant_change		10297	0.959	10297
145	PA_chr01_G000212	3941	3	TIR domain			OG0010966	no_significant_change	1.16573e-15	7609	1.258	7609
146	PA_chr01_G000213	4251	4	TMV resistance protein N-like		BspA type Leucine rich repeat region (6 copies);TIR domain;NB-ARC domain	OG0010966	no_significant_change	0.0485888	58698	0.8288	11539	1.1757	12387	-1.2303	15999	0.7099	18773
147	PA_chr01_G000214	1980	2	Benzyl alcohol		Transferase family	OG0000126	expanded	1	13671	0.6035	13671
148	PA_chr01_G000215	4613	4	TIR domain		BspA type Leucine rich repeat region (6 copies);TIR domain;NB-ARC domain	OG0010966	no_significant_change	1.07412e-06	10190	0.9707	10190
149	PA_chr01_G000216	3314	1	Zein-binding		Zein-binding	OG0002135	no_significant_change		10408	0.947	10408
150	PA_chr01_G000217	15737	5	Protein of unknown function (DUF3741)		DUF761-associated sequence motif;Domain of unknown function (DUF4378);Protein of unknown function (DUF3741)	OG0000830	no_significant_change	1	39563	1.6145	4897	1.0307	13393	2.1707	9795	1.8277	11478
151	PA_chr01_G000218	675	1							47986	1.6145	4897	0.4248	18237	1.6925	12750	1.7235	12102
152	PA_chr01_G000219	72163	3			F-box domain	OG0003996	no_significant_change	1	22302	1.7883	3826	2.4171	6646	-3.0343	5294	2.8009	6536
153	PA_chr01_G000220	1911	1				OG0043655	no_significant_change		38765	1.3398	6928	0.7834	15315	-3.3601	3827	-1.6266	12695
154	PA_chr01_G000222	4916	2	Kinase-like protein TMKL1		Protein tyrosine and serine/threonine kinase	OG0002070	no_significant_change	1	39195	1.4109	6364	-1.3672	11263	1.5087	14031	2.5826	7537
155	PA_chr01_G000223	5576	11	Provides the precursors necessary for DNA synthesis. Catalyzes the biosynthesis of deoxyribonucleotides from the corresponding ribonucleotides		ATP cone domain;Ribonucleotide reductase, barrel domain;Ribonucleotide reductase, all-alpha domain	OG0003401	no_significant_change	1	39636	1.4326	6184	-1.1869	12305	2.1338	9991	1.8836	11156
156	PA_chr01_G000224	780	2	Provides the precursors necessary for DNA synthesis. Catalyzes the biosynthesis of deoxyribonucleotides from the corresponding ribonucleotides			OG0015682	no_significant_change		49408	1.4326	6184	-0.5059	17588	2.0347	10574	1.2731	15062
157	PA_chr01_G000225	281341	13	DEAD-box ATP-dependent RNA helicase 13		Helicase conserved C-terminal domain;DEAD/DEAH box helicase	OG0009696	no_significant_change		12525	1.3885	6538	-4.0971	2351	3.8944	2061	4.3544	1575
158	PA_chr01_G000228	67435	7	Exostosin family		Exostosin family	OG0008382	no_significant_change		22417	1.5919	5060	3.0344	4692	2.6832	7048	3.0091	5617
159	PA_chr01_G000229	14154	3	Belongs to the glycosyltransferase 2 family		Cellulose synthase	OG0001215	no_significant_change		61057	1.2503	7672	0.3165	19030	-0.9859	17661	1.0379	16694
160	PA_chr01_G000231	13043	7	Belongs to the glycosyltransferase 2 family		Cellulose synthase	OG0001215	no_significant_change		1958	2.2949	1958
161	PA_chr01_G000233	7270	8	Belongs to the glycosyltransferase 2 family		Cellulose synthase	OG0001215	no_significant_change		68724	1.196	8143	0.0878	20160	-0.3196	20663	-0.5129	19758
162	PA_chr01_G000234	7585	9	Belongs to the glycosyltransferase 2 family		Cellulose synthase	OG0001215	no_significant_change		65148	1.2412	7755	0.2707	19331	-0.8665	18381	-0.5274	19681
163	PA_chr01_G000235	13509	7	Belongs to the glycosyltransferase 2 family		Cellulose synthase	OG0001215	no_significant_change		40671	1.514	5584	0.4113	18335	2.27	9252	-2.5904	7500
164	PA_chr01_G000236	892	1				OG0004281	no_significant_change	1	16957	0	16957
165	PA_chr01_G000237	3870	1	Belongs to the protein kinase superfamily. Ser Thr protein kinase family		Leucine rich repeat;Leucine rich repeat N-terminal domain	OG0000124	no_significant_change	0.0544261	36910	1.2648	7557	0.5199	17478	-3.6378	2809	2.2745	9066
166	PA_chr01_G000237	3870	1	Belongs to the protein kinase superfamily. Ser Thr protein kinase family		Leucine rich repeat;Leucine rich repeat N-terminal domain	OG0000124	no_significant_change	0.0544261	36910	1.2648	7557	-0.5199	17478	-3.6378	2809	2.2745	9066
167	PA_chr01_G000238	824	1				OG0043656	no_significant_change		43094	1.5069	5638	0.8294	14946	1.8902	11457	1.9002	11053
168	PA_chr01_G000239	1341	1	phosphatase 2C		Protein phosphatase 2C	OG0000391	expanded	1	51349	1.5069	5638	-0.6855	16129	-1.1884	16305	1.5368	13277
169	PA_chr01_G000241	1779	1	phosphatase 2C		Protein phosphatase 2C	OG0000391	expanded	1	71298	0.7932	11876	0.4367	18144	-0.3622	20547	-0.2489	20731
170	PA_chr01_G000242	671	1				OG0002979	no_significant_change	1	10827	0.9037	10827
171	PA_chr01_G000243	1278	1				OG0017203	no_significant_change	1	10827	0.9037	10827
172	PA_chr01_G000244	1283	1	phosphatase 2C		Protein phosphatase 2C	OG0000391	expanded	1	10471	0.9406	10471
173	PA_chr01_G000245	23732	2	phosphatase 2C		Protein phosphatase 2C	OG0000391	expanded	1	38779	1.0802	9179	-1.1726	12410	-2.6913	7013	-2.0528	10177
174	PA_chr01_G000246	1321	1	phosphatase 2C		Protein phosphatase 2C	OG0000391	expanded	1	13257	0.6476	13257
175	PA_chr01_G000247	1890	1	phosphatase 2C		Protein phosphatase 2C	OG0000391	expanded	1	11248	0.8597	11248
176	PA_chr01_G000248	144489	4	phosphatase 2C		Protein phosphatase 2C	OG0000391	expanded	1	35578	1.3212	7089	2.7381	5573	1.7521	12352	-1.9862	10564
177	PA_chr01_G000249	1606	1	phosphatase 2C		Protein phosphatase 2C	OG0000391	expanded	1	9052	1.0939	9052
178	PA_chr01_G000250	1525	1	phosphatase 2C		Protein phosphatase 2C	OG0000391	expanded	1	9692	1.0247	9692
179	PA_chr01_G000251	1463	1	Protein phosphatase 2C		Protein phosphatase 2C	OG0043657	no_significant_change		10995	0.886	10995
180	PA_chr01_G000252	1223	1	Protein phosphatase 2C		Protein phosphatase 2C	OG0043657	no_significant_change		11255	0.859	11255
181	PA_chr01_G000253	1455	1	phosphatase 2C		Protein phosphatase 2C	OG0000391	expanded	1	12430	0.7352	12430
182	PA_chr01_G000254	1660	1	phosphatase 2C		Protein phosphatase 2C	OG0000391	expanded	1	11367	0.847	11367
183	PA_chr01_G000256	1712	1	phosphatase 2C		Protein phosphatase 2C	OG0000391	expanded	1	68281	0.7037	12731	0.4028	18398	-0.9859	17661	-0.5686	19491
184	PA_chr01_G000257	1443	1	phosphatase 2C		Protein phosphatase 2C	OG0000391	expanded	1	11157	0.8689	11157
185	PA_chr01_G000258	45080	1				OG0043658	no_significant_change		18257	0.9628	10261	4.6231	1602	-3.3579	3840	-3.8808	2554
186	PA_chr01_G000259	1605	1	phosphatase 2C		Protein phosphatase 2C	OG0000391	expanded	1	63406	0.7587	12209	0.809	15110	-0.9991	17586	-0.7582	18501
187	PA_chr01_G000261	1764	1	phosphatase 2C		Protein phosphatase 2C	OG0000391	expanded	1	49351	0.7573	12221	0.3711	18647	-2.0178	10674	-2.5289	7809
188	PA_chr01_G000262	1680	1	phosphatase 2C		Protein phosphatase 2C	OG0000391	expanded	1	9875	1.0048	9875
189	PA_chr01_G000263	1505	1	phosphatase 2C		Protein phosphatase 2C	OG0000391	expanded	1	8524	1.1537	8524
190	PA_chr01_G000264	1648	1	phosphatase 2C		Protein phosphatase 2C	OG0000391	expanded	1	59876	1.2502	7673	0.1142	20080	-0.4066	20418	-1.7882	11705
191	PA_chr01_G000265	841	1	phosphatase 2C		Protein phosphatase 2C	OG0000391	expanded	1	11998	0.7803	11998
192	PA_chr01_G000266	1852	1	phosphatase 2C		Protein phosphatase 2C	OG0000391	expanded	1	66577	0.5345	14316	0.2677	19352	1.1061	16878	1.132	16031
193	PA_chr01_G000270	61073	2	phosphatase 2C		Protein phosphatase 2C	OG0000391	expanded	1	34785	0.9825	10082	1.008	13559	-2.8467	6195	3.1573	4949
194	PA_chr01_G000271	1821	1	phosphatase 2C		Protein phosphatase 2C	OG0000391	expanded	1	38169	2.0754	2574	0.8084	15115	2.2018	9629	-1.9365	10851
195	PA_chr01_G000272	1707	1	phosphatase 2C		Protein phosphatase 2C	OG0000391	expanded	1	1237	2.6734	1237
196	PA_chr01_G000276	1457	1	phosphatase 2C		Protein phosphatase 2C	OG0000391	expanded	1	41484	1.3029	7240	0.5655	17125	-2.4739	8141	-2.2915	8978
197	PA_chr01_G000277	2322	2	Belongs to the protein kinase superfamily. Ser Thr protein kinase family		Protein kinase domain	OG0000499	no_significant_change	1	15362	0.4146	15362
198	PA_chr01_G000278	1670	1	phosphatase 2C		Protein phosphatase 2C	OG0000391	expanded	1	9447	1.0509	9447
199	PA_chr01_G000279	1423	1	phosphatase 2C		Protein phosphatase 2C	OG0000391	expanded	1	9447	1.0509	9447
200	PA_chr01_G000280	1669	1	phosphatase 2C		Protein phosphatase 2C	OG0000391	expanded	1	7158	1.3127	7158
201	PA_chr01_G000281	1690	1	phosphatase 2C		Protein phosphatase 2C	OG0000391	expanded	1	11539	0.8288	11539
202	PA_chr01_G000282	1922	1	phosphatase 2C		Protein phosphatase 2C	OG0000391	expanded	1	11595	0.823	11595
203	PA_chr01_G000283	7479	1	phosphatase 2C		Protein phosphatase 2C	OG0000391	expanded	1	16957	0	16957
204	PA_chr01_G000285	1618	1	phosphatase 2C		Protein phosphatase 2C	OG0000391	expanded	1	16957	0	16957
205	PA_chr01_G000288	1747	1	phosphatase 2C		Protein phosphatase 2C	OG0000391	expanded	1	62961	1.0688	9285	-0.8639	14673	0.5358	19980	-0.6609	19023
206	PA_chr01_G000289	1540	1	phosphatase 2C		Protein phosphatase 2C	OG0000391	expanded	1	12549	0.723	12549
207	PA_chr01_G000290	4831	3	glycerol-3-phosphate transporter		Major Facilitator Superfamily	OG0001534	no_significant_change	1	11045	0.8807	11045
208	PA_chr01_G000291	1598	1	phosphatase 2C		Protein phosphatase 2C	OG0000391	expanded	1	12781	0.6985	12781
209	PA_chr01_G000292	3964	1				OG0012366	no_significant_change	1	37096	1.2795	7429	0.8252	14979	3.1368	4810	-2.1112	9878
210	PA_chr01_G000293	4002	3	Brefeldin A-inhibited guanine nucleotide-exchange protein		Dimerisation and cyclophilin-binding domain of Mon2;Guanine nucleotide exchange factor in Golgi transport N-terminal	OG0001922	no_significant_change	0.987156	69935	0.6156	13558	0.4538	18008	0.394	20460	-0.8526	17909
211	PA_chr01_G000294	5447	1	DYW family of nucleic acid deaminases		PPR repeat family;PPR repeat	OG0043659	no_significant_change		69935	0.6156	13558	0.4538	18008	0.394	20460	-0.8526	17909
212	PA_chr01_G000295	78210	8	GTP-BINDING protein		Ras family	OG0001111	no_significant_change	1	23056	1.6047	4966	3.095	4521	-2.6168	7390	-2.8786	6179
213	PA_chr01_G000299	722	2	gag-polypeptide of LTR copia-type		gag-polypeptide of LTR copia-type	OG0001654	expanded	1	12035	0.7764	12035
214	PA_chr01_G000300	4505	4	resistance protein		BspA type Leucine rich repeat region (6 copies);TIR domain;NB-ARC domain	OG0013000	no_significant_change	2.9976e-14	13856	0.584	13856
215	PA_chr01_G000302	3221	1				OG0043660	no_significant_change		16205	0.2972	16205
216	PA_chr01_G000303	1721	2	TMV resistance protein N-like		TIR domain	OG0013766	no_significant_change	2.8984e-05	10337	0.9546	10337
217	PA_chr01_G000304	4801	3	TMV resistance protein N-like		BspA type Leucine rich repeat region (6 copies);NB-ARC domain	OG0013000	no_significant_change	0.000150371	10337	0.9546	10337
218	PA_chr01_G000305	724	1				OG0031747	no_significant_change		5606	1.5107	5606
219	PA_chr01_G000306	2603	3	TMV resistance protein N-like		TIR domain;NB-ARC domain	OG0013000	no_significant_change	0.209068	13075	0.6671	13075
220	PA_chr01_G000308	1737	2	resistance protein		TIR domain;NB-ARC domain	OG0013766	no_significant_change	1	16957	0	16957
221	PA_chr01_G000309	773	1	resistance protein		TIR domain	OG0013766	no_significant_change	1	16957	0	16957
222	PA_chr01_G000310	1737	2	resistance protein		TIR domain;NB-ARC domain	OG0013766	no_significant_change	1	16957	0	16957
223	PA_chr01_G000311	773	1	RESISTANCE protein		TIR domain	OG0013766	no_significant_change	1	16957	0	16957
224	PA_chr01_G000312	2612	1				OG0043660	no_significant_change		16957	0	16957
225	PA_chr01_G000313	1753	2	TIR domain		Leucine Rich Repeat	OG0017204	no_significant_change	0.000898892	13819	0.5878	13819
226	PA_chr01_G000315	7303	4	TMV resistance protein N-like		BspA type Leucine rich repeat region (6 copies);TIR domain;NB-ARC domain	OG0013000	no_significant_change	1.85286e-07	13551	0.6163	13551
227	PA_chr01_G000316	6140	4	TMV resistance protein N-like		BspA type Leucine rich repeat region (6 copies);TIR domain;NB-ARC domain	OG0013000	no_significant_change	0.0762164	11109	0.874	11109
228	PA_chr01_G000318	7207	1	Belongs to the protein kinase superfamily. Ser Thr protein kinase family		Leucine rich repeat	OG0000408	no_significant_change	1	9280	1.0693	9280
229	PA_chr01_G000321	654	1	Ribonuclease H protein		TIR domain	OG0013766	no_significant_change	1	15917	0.3439	15917
230	PA_chr01_G000323	11584	3	RNA helicase		DEAD/DEAH box helicase			0.0716581	5125	1.5817	5125
231	PA_chr01_G000324	1038	1	TMV resistance protein N-like		TIR domain	OG0013766	no_significant_change	0.218464	9368	1.0594	9368
232	PA_chr01_G000325	3486	4	TMV resistance protein N-like		TIR domain;NB-ARC domain	OG0013000	no_significant_change	3.23138e-05	9216	1.0761	9216
233	PA_chr01_G000326	2198	1			BspA type Leucine rich repeat region (6 copies)	OG0005319	no_significant_change	1	11215	0.863	11215
234	PA_chr01_G000327	65826	5	psbP domain-containing protein 4		PsbP	OG0009992	no_significant_change		21598	1.5996	5002	-1.8604	8851	3.1034	4974	-3.8017	2771
235	PA_chr01_G000328	7309	9	Nucleolar protein		NOP5NT (NUC127) domain;snoRNA binding domain, fibrillarin	OG0004482	no_significant_change	0.0080262	28207	1.5404	5404	1.7305	9397	2.6108	7423	-2.9228	5983
236	PA_chr01_G000329	2305	3			tify domain	OG0001066	no_significant_change	1.34853e-06	54742	1.3303	7011	0.8151	15060	1.4185	14681	0.8396	17990
237	PA_chr01_G000330	2952	1	ammonium transporter		Ammonium Transporter Family	OG0001027	no_significant_change	0.146329	35294	1.1194	8820	1.223	12080	-2.4599	8212	-2.8775	6182
238	PA_chr01_G000331	157607	8	Tetratricopeptide repeat protein 4 homolog		Cns1/TTC4 Wheel domain	OG0008876	no_significant_change		16289	1.3199	7099	3.1236	4421	-3.9152	2018	3.8071	2751
239	PA_chr01_G000332	3047	1	Ammonium transporter		Ammonium Transporter Family	OG0001027	no_significant_change	1	47232	1.0712	9264	-1.1086	12841	1.8216	11886	1.5417	13241
240	PA_chr01_G000333	54607	1	ammonium transporter		Ammonium Transporter Family	OG0001027	no_significant_change	1	27650	1.6079	4944	1.7075	9504	-2.7025	6950	-2.8634	6252
241	PA_chr01_G000334	3244	1	Ammonium transporter		Ammonium Transporter Family	OG0001027	no_significant_change	1	54081	1.8442	3522	0.8005	15181	-1.1551	16535	0.697	18843
242	PA_chr01_G000335	300294	11				OG0012513	no_significant_change		14264	1.2663	7543	-4.2644	2072	-3.5791	3001	4.3161	1648
243	PA_chr01_G000337	362681	14	peptidase		PDZ domain;Peptidase family S41	OG0008123	no_significant_change		14320	1.349	6855	3.7942	2898	3.8045	2283	-3.9878	2284
244	PA_chr01_G000339	33404	2				OG0005491	no_significant_change	0.744099	70733	0.7765	12034	-0.3379	18886	0.5779	19821	-0.462	19992
245	PA_chr01_G000340	869	1							27229	1.2455	7716					-0.5643	19513
246	PA_chr01_G000343	88679	2				OG0005491	no_significant_change	1	42047	1.247	7702	-1.0021	13604	-1.5473	13749	-2.7027	6992
247	PA_chr01_G000344	854	2				OG0005319	no_significant_change	1	65091	0.8838	11015	0.7529	15563	-0.6422	19548	-0.6727	18965
248	PA_chr01_G000345	846	1				OG0031748	no_significant_change		10565	0.9307	10565
249	PA_chr01_G000346	7851	4	TMV resistance protein N-like		BspA type Leucine rich repeat region (6 copies);TIR domain;NB-ARC domain	OG0013000	no_significant_change	0.036284	37182	0.845	11386	1.9301	8569	-2.2379	9425	-2.53	7802
250	PA_chr01_G000347	771	1				OG0022461	no_significant_change	0.000877242	11386	0.845	11386
251	PA_chr01_G000348	299	1							7007	1.3311	7007
252	PA_chr01_G000349	685	1	RING-type zinc-finger		Ring finger domain	OG0014800	no_significant_change	8.08876e-06	14630	0.4999	14630
253	PA_chr01_G000350	1351	2	oleate hydratase activity		Uncharacterized protein conserved in bacteria (DUF2236)	OG0004040	no_significant_change	1	56535	0.7601	12195	-1.3063	11602	-0.5863	19787	-1.5881	12951
254	PA_chr01_G000351	1572	4	Belongs to the terpene synthase family		Terpene synthase, N-terminal domain	OG0000004	no_significant_change		13524	0.6194	13524
255	PA_chr01_G000353	1673	2	TMV resistance protein N-like		TIR domain;NB-ARC domain	OG0013766	no_significant_change	0.0154234	13653	0.6054	13653
256	PA_chr01_G000354	524	1	TMV resistance protein N-like						74661	0.6054	13653	-0.2909	19197	-0.1997	20905	-0.1789	20906
257	PA_chr01_G000355	1086	1				OG0005319	no_significant_change	0.0380786	13653	0.6054	13653
258	PA_chr01_G000356	1018	2				OG0005319	no_significant_change	1	12790	0.6976	12790
259	PA_chr01_G000357	799	2	Belongs to the terpene synthase family		Terpene synthase, N-terminal domain	OG0011348	no_significant_change	1	13386	0.6338	13386
260	PA_chr01_G000358	2042	2	TMV resistance protein N-like		TIR domain;NB-ARC domain	OG0013766	no_significant_change	1	71100	0.5451	14218	-0.3162	19033	-0.9852	17666	-0.4173	20183
261	PA_chr01_G000359	1220	2				OG0005319	no_significant_change	1	68472	0.6068	13640	0.882	14532	-0.4745	20204	-0.4367	20096
262	PA_chr01_G000360	1809	1	belongs to the protein kinase superfamily		PAN-like domain;Putative undecaprenyl diphosphate synthase	OG0002472	no_significant_change	2.23292e-06	13640	0.6068	13640
263	PA_chr01_G000361	2238	1				OG0043662	no_significant_change		11850	0.796	11850
264	PA_chr01_G000363	6625	1	At4g38062-like			OG0011349	no_significant_change	1	16198	0.2984	16198
265	PA_chr01_G000364	4485	4	TMV resistance protein N-like		TIR domain;NB-ARC domain				41817	1.4975	5699	-1.3278	11484	-1.4755	14277	2.0217	10357
266	PA_chr01_G000365	3822	4	TMV resistance protein N-like		Leucine rich repeat;TIR domain;NB-ARC domain;Leucine Rich Repeat	OG0017204	no_significant_change	0.0362251	74730	0.4885	14729	0.3819	18565	-0.1307	21011	-0.3524	20425
267	PA_chr01_G000366	20929	3	TIR domain		Leucine Rich Repeat	OG0026020	no_significant_change		48638	1.0041	9881	-1.2591	11872	-1.4163	14695	-1.708	12190
268	PA_chr01_G000367	775	1							12098	0.77	12098
269	PA_chr01_G000369	3690	3	TIR domain		NB-ARC domain	OG0000021	no_significant_change		11332	0.8508	11332
270	PA_chr01_G000370	21164	4	resistance protein		TIR domain;NB-ARC domain;Leucine Rich Repeat	OG0017205	no_significant_change	9.46904e-07	36730	0.7351	12431	1.894	8717	-2.6956	6989	-2.3667	8593
271	PA_chr01_G000372	20875	2	TMV resistance protein N-like		TIR domain;NB-ARC domain	OG0017205	no_significant_change	3.69473e-05	13550	0.6164	13550
272	PA_chr01_G000373	162856	5	Exosome component EXOSC1/CSL4		Exosome component EXOSC1/CSL4	OG0008353	no_significant_change	5.89565e-07	22439	0.7853	11952	-3.4735	3581	-3.1797	4615	-3.9842	2291
273	PA_chr01_G000375	3845	3	transcription factor		Helix-loop-helix DNA-binding domain	OG0015277	no_significant_change		51691	0.9795	10108	0.9174	14248	-1.2326	15982	1.8493	11353
274	PA_chr01_G000376	350504	16	ATP-dependent zinc metalloprotease		AAA+ lid domain;ATPase family associated with various cellular activities (AAA)	OG0006967	no_significant_change		23721	1.2255	7890	3.1707	4300	2.6793	7067	3.2851	4464
275	PA_chr01_G000377	4162	4	Belongs to the disease resistance NB-LRR family		TIR domain;NB-ARC domain	OG0005324	no_significant_change		15755	0.3659	15755
276	PA_chr01_G000379	101857	4	ribosomal protein		Ribosomal protein TL5, C-terminal domain;Ribosomal L25p family	OG0003271	no_significant_change	0.57581	24199	0.8355	11474	2.7507	5527	2.9851	5512	-4.2945	1686
277	PA_chr01_G000381	79410	2	Removal of H(2)O(2), oxidation of toxic reductants, biosynthesis and degradation of lignin, suberization, auxin catabolism, response to environmental stresses such as wounding, pathogen attack and oxidative stress		Peroxidase	OG0001311	no_significant_change	0.00304317	39655	1.0554	9407	1.295	11667	2.0686	10365	2.4463	8216
278	PA_chr01_G000382	1957	4	Removal of H(2)O(2), oxidation of toxic reductants, biosynthesis and degradation of lignin, suberization, auxin catabolism, response to environmental stresses such as wounding, pathogen attack and oxidative stress		Peroxidase	OG0001311	no_significant_change	1	67805	0.5064	14573	0.8242	14988	-0.8649	18389	-0.492	19855
279	PA_chr01_G000383	2212	4	Removal of H(2)O(2), oxidation of toxic reductants, biosynthesis and degradation of lignin, suberization, auxin catabolism, response to environmental stresses such as wounding, pathogen attack and oxidative stress		Peroxidase	OG0001311	no_significant_change	1	13770	0.5931	13770
280	PA_chr01_G000384	2102	4	Removal of H(2)O(2), oxidation of toxic reductants, biosynthesis and degradation of lignin, suberization, auxin catabolism, response to environmental stresses such as wounding, pathogen attack and oxidative stress		Peroxidase	OG0001311	no_significant_change	1	58773	0.8107	11714	0.6543	16380	-1.103	16901	-1.4612	13778
281	PA_chr01_G000385	1322	2	Protein of unknown function (DUF861)		Protein of unknown function (DUF861)	OG0001372	no_significant_change	1	59374	1.0313	9633	-0.2529	19441	1.4615	14377	1.1473	15923
282	PA_chr01_G000386	1013	2	Protein of unknown function (DUF861)		Protein of unknown function (DUF861)	OG0001372	no_significant_change	1	55867	0.7852	11953	0.2992	19139	-1.4168	14692	-2.0718	10083
283	PA_chr01_G000387	65498	4	resistance protein		NB-ARC domain;Leucine Rich Repeat	OG0017205	no_significant_change	1.11444e-11	19966	0.6323	13401	5.2424	1039	3.5087	3256	-3.9946	2270
284	PA_chr01_G000391	22911	4	TMV resistance protein N-like		TIR domain;NB-ARC domain;Leucine Rich Repeat	OG0017205	no_significant_change	0.0131439	13206	0.6531	13206
285	PA_chr01_G000393	178832	9	C2 domain		C2 domain	OG0006780	no_significant_change	5.12685e-09	24306	1.0718	9259	3.7305	3024	2.9232	5805	-2.8702	6218
286	PA_chr01_G000394	2268	1				OG0015279	no_significant_change	1	41117	1.1695	8381	1.2926	11680	-2.1601	9849	-1.8756	11207
287	PA_chr01_G000395	3434	2				OG0015279	no_significant_change	1	46948	0.9393	10483	1.1473	12566	-1.6752	12864	-1.9035	11035
288	PA_chr01_G000396	3965	6	Neprosin		Neprosin activation peptide;Neprosin	OG0001317	no_significant_change	1	60292	1.0372	9577	0.336	18897	1.2602	15790	1.1323	16028
289	PA_chr01_G000398	2357	3	mRNA processing	CSTF1	Membrane transport protein	OG0002127	no_significant_change	0.145335	15253	0.4284	15253
290	PA_chr01_G000399	4759	4	ADP binding		Leucine rich repeat;TIR domain;NB-ARC domain	OG0022462	no_significant_change	0.363145	14286	0.5377	14286
291	PA_chr01_G000400	6068	3	TIR domain		Leucine rich repeat;TIR domain;NB-ARC domain	OG0022462	no_significant_change	4.66294e-14	15025	0.455	15025
292	PA_chr01_G000401	1342	1			Leucine rich repeat	OG0022462	no_significant_change	1	13427	0.6296	13427
293	PA_chr01_G000402	5525	4	ADP binding		Leucine rich repeat;TIR domain;NB-ARC domain	OG0022462	no_significant_change	1	13065	0.6681	13065
294	PA_chr01_G000403	5232	4	ADP binding		Leucine rich repeat;TIR domain;NB-ARC domain	OG0022462	no_significant_change	1	16957	0	16957
295	PA_chr01_G000404	3734	1	E3 ubiquitin-protein ligase		HECT-domain (ubiquitin-transferase)	OG0004367	no_significant_change	1	57715	1.2434	7735	-0.4316	18186	-1.1325	16701	-1.2685	15093
296	PA_chr01_G000405	82891	12	receptor-like serine threonine-protein kinase		Protein tyrosine and serine/threonine kinase	OG0001815	no_significant_change	0.121283	23810	1.5353	5438	2.2146	7417	-2.9493	5684	3.0874	5271
297	PA_chr01_G000409	14761	4	beta-amylase		Glycosyl hydrolase family 14	OG0000201	no_significant_change	1	36032	0.8856	10999	2.1301	7732	-2.1567	9866	-2.6049	7435
298	PA_chr01_G000412	57325	9	Belongs to the glycosyltransferase 2 family		Cellulose synthase	OG0001215	no_significant_change		8554	1.1501	8554
299	PA_chr01_G000414	808	1	mediator of RNA polymerase II transcription subunit			OG0021822	no_significant_change	0.350387	11232	0.8613	11232
300	PA_chr01_G000416	2673	5	Belongs to the glycosyltransferase 2 family		Cellulose synthase	OG0001215	no_significant_change		59485	0.8645	11200	-1.0324	13379	1.3218	15363	-0.5584	19543
301	PA_chr01_G000418	741	1							54114	0.8635	11210	0.5744	17047	-1.436	14554	-1.86	11303
302	PA_chr01_G000419	5693	4	beta-amylase		Glycosyl hydrolase family 14	OG0000201	no_significant_change	0.567307	37922	0.8635	11210	-1.1648	12462	-3.2712	4211	2.0814	10039
303	PA_chr01_G000420	5062	4	beta-amylase		Glycosyl hydrolase family 14	OG0000201	no_significant_change	1	53457	1.0478	9477	1.0636	13160	-1.4378	14544	1.0978	16276
304	PA_chr01_G000421	5177	4	beta-amylase		Glycosyl hydrolase family 14	OG0000201	no_significant_change	1	49690	0.836	11470	0.9967	13650	-1.6145	13280	-1.8618	11290
305	PA_chr01_G000422	1167	2				OG0000660	no_significant_change	0.369838	56100	0.8629	11216	1.292	11684	-1.242	15918	0.9522	17282
306	PA_chr01_G000425	108181	16	serine threonine-protein phosphatase	BSL2	Calcineurin-like phosphoesterase	OG0001138	no_significant_change	0.0560781	30252	0.7625	12172	2.4899	6405	-3.1065	4956	-2.76	6719
307	PA_chr01_G000427	140524	14	Intron-binding protein aquarius N-terminus	AQR	Intron-binding protein aquarius N-terminus;AAA domain	OG0004254	no_significant_change		20326	1.542	5391	-2.9188	5034	-3.1622	4693	3.1005	5208
308	PA_chr01_G000428	94194	6	golgin candidate		GHMP kinases C terminal;GHMP kinases N terminal domain	OG0006345	no_significant_change		15908	1.3052	7222	4.811	1391	-3.4071	3649	-3.5123	3646
309	PA_chr01_G000430	6375	4				OG0007212	no_significant_change	1	40853	0.9082	10784	1.4788	10646	-2.0968	10217	2.2497	9206
310	PA_chr01_G000432	596	1				OG0013767	no_significant_change	1	16957	0	16957
311	PA_chr01_G000433	800	1				OG0005340	no_significant_change	1	61784	0.8588	11257	0.3746	18622	-1.3146	15411	-1.0665	16494
312	PA_chr01_G000434	516	1							45638	1.0134	9793	0.9883	13710	1.2825	15644	2.81	6491
313	PA_chr01_G000435	1347	1							41131	1.0134	9793	0.5918	16894	3.2943	4100	-2.0243	10344
314	PA_chr01_G000436	4292	4	Belongs to the disease resistance NB-LRR family		TIR domain;NB-ARC domain	OG0005324	no_significant_change		13185	0.6553	13185
315	PA_chr01_G000437	1084	1							13677	0.6029	13677
316	PA_chr01_G000440	2794	3	NB-ARC domain		TIR domain;NB-ARC domain	OG0005324	no_significant_change		16843	0.1534	16843
317	PA_chr01_G000441	1025	1				OG0020220	no_significant_change		11179	0.8667	11179
318	PA_chr01_G000442	126989	8	MADS-box transcription factor	AGL6	K-box region;SRF-type transcription factor (DNA-binding and dimerisation domain)	OG0000009	no_significant_change	1	10948	1.6136	4904	-3.5197	3474	-4.4107	1086	4.4114	1484
319	PA_chr01_G000443	669	1							37743	1.1373	8668	0.8904	14464	3.6666	2726	1.7576	11885
320	PA_chr01_G000444	141737	4				OG0007119	no_significant_change		8115	1.5115	5601	-5.8552	660	4.3219	1207	5.1371	647
321	PA_chr01_G000445	223729	7	Floral homeotic protein		K-box region;SRF-type transcription factor (DNA-binding and dimerisation domain)	OG0000009	no_significant_change	0.0375215	22478	1.1374	8667	3.5931	3311	-3.2499	4303	-2.8744	6197
322	PA_chr01_G000446	530	1				OG0012695	no_significant_change	1	11354	0.8485	11354
323	PA_chr01_G000448	227897	6	Floral homeotic protein		K-box region;SRF-type transcription factor (DNA-binding and dimerisation domain)	OG0000009	no_significant_change	1	19414	1.3319	7000	-3.0718	4581	3.2457	4324	-3.5572	3509
324	PA_chr01_G000451	316816	7	Floral homeotic protein		K-box region;SRF-type transcription factor (DNA-binding and dimerisation domain)	OG0000009	no_significant_change	1	13044	1.1805	8282	3.8657	2769	4.1591	1505	5.3476	488
325	PA_chr01_G000452	162051	7	MADS-box protein SOC1-like	SOC1	K-box region;SRF-type transcription factor (DNA-binding and dimerisation domain)	OG0000009	no_significant_change	1	10884	2.424	1694	-3.0832	4551	3.7705	2393	-4.0068	2246
326	PA_chr01_G000453	363	1							54331	2.0311	2740	-0.4113	18335	1.2676	15739	0.915	17517
327	PA_chr01_G000455	366165	8	MADS-box protein	SOC1	K-box region;SRF-type transcription factor (DNA-binding and dimerisation domain)	OG0000009	no_significant_change	0.0120559	9411	4.9814	126	-3.0941	4523	4.0981	1617	-3.6697	3145
328	PA_chr01_G000458	214472	8	MADS-box protein	SOC1	K-box region;SRF-type transcription factor (DNA-binding and dimerisation domain)	OG0000009	no_significant_change	1	32097	1.8643	3428	1.6372	9816	-2.2599	9296	-2.1749	9557
329	PA_chr01_G000460	305890	7	MADS-box protein	SOC1	K-box region;SRF-type transcription factor (DNA-binding and dimerisation domain)	OG0000009	no_significant_change	1	17549	4.5443	187	2.6397	5892	-2.9304	5773	2.9876	5697
330	PA_chr01_G000464	760	1							11834	0.7976	11834
331	PA_chr01_G000467	283223	7	MADS-box protein	SOC1	K-box region;SRF-type transcription factor (DNA-binding and dimerisation domain)	OG0000009	no_significant_change	1	6534	5.4989	76	-3.7114	3054	4.3233	1203	4.0235	2201
332	PA_chr01_G000470	3665	10				OG0004543	no_significant_change	1	15683	0.3751	15683
333	PA_chr01_G000471	1246	1	Belongs to the zinc-containing alcohol dehydrogenase family. Class-III subfamily		Alcohol dehydrogenase GroES-like domain	OG0012097	no_significant_change	1	15146	0.4407	15146
334	PA_chr01_G000472	129130	7	MADS-box protein SOC1-like	SOC1	K-box region;SRF-type transcription factor (DNA-binding and dimerisation domain)	OG0000009	no_significant_change	1	17770	2.9284	922	3.0782	4561	-2.4491	8271	3.4102	4016
335	PA_chr01_G000473	986	1				OG0001442	no_significant_change	1	59764	2.215	2157	0.2895	19208	0.8784	18302	-0.4366	20097
336	PA_chr01_G000476	398517	8	MADS-box protein SOC1-like	SOC1	K-box region;SRF-type transcription factor (DNA-binding and dimerisation domain)	OG0000009	no_significant_change	0.459724	15417	2.174	2269	-2.6112	5985	-3.1926	4555	-3.8622	2608
337	PA_chr01_G000484	209078	7	Floral homeotic protein		K-box region;SRF-type transcription factor (DNA-binding and dimerisation domain)	OG0000009	no_significant_change	1	10826	2.0263	2757	-3.8554	2787	-3.4925	3314	4.1284	1968
338	PA_chr01_G000485	491754	8	MADS-box protein	SOC1	K-box region;SRF-type transcription factor (DNA-binding and dimerisation domain)	OG0000009	no_significant_change	1	2322	3.0551	786	-6.8553	305	4.9763	526	5.0699	705
339	PA_chr01_G000487	1800	1							40545	1.7248	4191	0.8062	15135	1.7206	12567	2.3539	8652
340	PA_chr01_G000488	372637	7	MADS-box protein SOC1-like		K-box region;SRF-type transcription factor (DNA-binding and dimerisation domain)	OG0000009	no_significant_change	1	7779	1.8012	3749	5.7139	753	-3.6898	2652	-5.168	625
341	PA_chr01_G000490	276017	9	MADS-box protein	SOC1	K-box region;SRF-type transcription factor (DNA-binding and dimerisation domain)	OG0000009	no_significant_change	1	12980	1.7106	4277	-3.7438	2998	3.5117	3250	3.9204	2455
342	PA_chr01_G000496	164136	7	MADS-box protein	SOC1	K-box region;SRF-type transcription factor (DNA-binding and dimerisation domain)	OG0000009	no_significant_change	1	28630	2.125	2391	1.9639	8413	-2.4873	8066	2.1329	9760
343	PA_chr01_G000497	9051	1	Belongs to the protein kinase superfamily			OG0001193	no_significant_change	1	3451	1.8593	3451
344	PA_chr01_G000499	319682	4	MADS	DAL44	Terpene synthase, N-terminal domain;SRF-type transcription factor (DNA-binding and dimerisation domain)				9037	2.5241	1500	4.6266	1595	4.556	903	3.1368	5039
345	PA_chr01_G000502	131102	7	Ribonuclease P protein subunit		RNase P subunit p30	OG0007699	no_significant_change	1	20800	0.8859	10996	2.0122	8208	-4.4084	1089	-5.3262	507
346	PA_chr01_G000506	38926	3	Protein ALUMINUM SENSITIVE		Uncharacterised protein family (UPF0014)	OG0004259	no_significant_change	1	26992	1.9962	2882	2.1124	7807	-2.742	6747	2.1751	9556
347	PA_chr01_G000507	59300	4	1-aminocyclopropane-1-carboxylate synthase	ACS8	Aminotransferase class I and II	OG0000168	expanded	1	39022	1.5227	5524	-1.3924	11110	2.2281	9476	1.5943	12912
348	PA_chr01_G000519	4784	1	Protein of unknown function (DUF1191)		Protein of unknown function (DUF1191)	OG0000937	no_significant_change	1	49315	1.0039	9883	1.8049	9098	-1.5778	13535	-1.0231	16799
349	PA_chr01_G000520	1669	1							52410	1.2534	7645	-0.6002	16823	-1.5342	13842	1.4169	14100
350	PA_chr01_G000521	1758	2	TMV resistance protein N-like		TIR domain;NB-ARC domain	OG0010966	no_significant_change	1	54876	1.0893	9094	-0.4355	18154	1.6937	12741	1.2993	14887
351	PA_chr01_G000522	999	2	Pathogenesis-related protein		Barwin family	OG0002495	no_significant_change	1	49980	1.2193	7940	1.268	11818	-0.8633	18402	1.7675	11820
352	PA_chr01_G000523	875	2	Pathogenesis-related protein		Barwin family	OG0002495	no_significant_change	1	9232	1.0745	9232
353	PA_chr01_G000524	877	2	Pathogenesis-related protein		Barwin family	OG0002495	no_significant_change	1	10288	0.96	10288
354	PA_chr01_G000525	1095	2	Pathogenesis-related protein		Barwin family	OG0002495	no_significant_change	1	12679	0.7089	12679
355	PA_chr01_G000526	1119	1	Non-catalytic subunit		BURP domain	OG0005133	no_significant_change	1	61659	1.172	8361	0.4361	18150	0.9607	17814	0.944	17334
356	PA_chr01_G000527	2586	2	Non-catalytic subunit		BURP domain	OG0005133	no_significant_change	1	46223	0.8496	11343	-0.394	18471	2.1768	9767	2.7751	6642
357	PA_chr01_G000528	5835	5	CCT motif		CCT motif	OG0000883	no_significant_change	1	51588	1.4952	5716	0.443	18094	1.4195	14674	1.564	13104
358	PA_chr01_G000533	69255	5	Pentatricopeptide repeat-containing protein At3g18110		Pentacotripeptide-repeat region of PRORP;Pentatricopeptide repeat domain;PPR repeat family;PPR repeat	OG0007646	no_significant_change		6242	1.6051	4962	-6.4735	408	4.8081	665	5.9758	207
359	PA_chr01_G000535	3308	2	Embryo-specific protein 3, (ATS3)		Embryo-specific protein 3, (ATS3)	OG0006496	no_significant_change	1	40826	1.3901	6526	-1.6317	9849	1.5139	13990	2.0047	10461
360	PA_chr01_G000536	818	1	Protein LTV1 homolog			OG0043664	no_significant_change		12558	0.7219	12558
361	PA_chr01_G000537	122926	7	Ribosomal protein S24e family			OG0010051	no_significant_change	0.018263	24556	1.95	3056	-2.9412	4957	2.6926	7004	-2.179	9539
362	PA_chr01_G000538	695	1				OG0026021	no_significant_change	1	10354	0.9529	10354
363	PA_chr01_G000539	29127	6	Homeobox protein knotted-1-like		Homeobox KN domain;KNOX2 domain;KNOX1 domain;ELK domain	OG0001538	no_significant_change	1	35389	1.3036	7235	1.505	10505	-2.4446	8297	-2.2177	9352
364	PA_chr01_G000540	3621	2	Nitrilase-like protein 2		Embryo-specific protein 3, (ATS3)	OG0006496	no_significant_change	1	42666	1.2225	7914	0.9923	13681	2.0464	10511	1.987	10560
365	PA_chr01_G000543	4692	5	Zeaxanthin epoxidase, chloroplastic-like		FAD binding domain	OG0000324	no_significant_change	0.782449	36283	0.8188	11637	1.4926	10567	2.7305	6811	-2.6422	7268
366	PA_chr01_G000545	6455	2	Thylakoid lumenal protein			OG0007994	no_significant_change	0.711926	13315	0.6415	13315
367	PA_chr01_G000546	368	1				OG0026022	no_significant_change		13315	0.6415	13315
368	PA_chr01_G000547	6870	4	protein At3g15000, mitochondrial-like			OG0001893	no_significant_change	1	30962	0.9246	10623	-1.1499	12548	3.0375	5279	3.901	2512
369	PA_chr01_G000549	704	1							65419	0.5636	14046	0.8237	14992	0.5801	19816	-1.0569	16565
370	PA_chr01_G000550	1272	2	Myb-related protein	MYB4		OG0000001	no_significant_change		14496	0.5145	14496
371	PA_chr01_G000551	92383	10	Performs the first committed step in the biosynthesis of isoprene-containing compounds such as sterols and terpenoids		Mevalonate 5-diphosphate decarboxylase C-terminal domain;GHMP kinases N terminal domain	OG0005282	no_significant_change	0.844529	28685	0.7422	12364	1.887	8747	-2.6979	6976	-5.1934	598
372	PA_chr01_G000553	764	1							67590	0.6883	12876	0.3483	18818	-0.8823	18281	-0.9001	17615
373	PA_chr01_G000554	708	1	ribonuclease H protein At1g65750		zinc-binding in reverse transcriptase				56869	0.6883	12876	0.5906	16906	1.0139	17497	-2.1694	9590
374	PA_chr01_G000555	3035	6				OG0010447	no_significant_change	1	53485	0.4087	15408	0.2958	19161	2.4341	8350	1.9853	10566
375	PA_chr01_G000556	4015	6				OG0010447	no_significant_change	0.000874434	13107	0.6637	13107
376	PA_chr01_G000557	2324	5				OG0018483	no_significant_change	1	60615	0.5814	13878	-0.6757	16209	-0.8922	18221	1.6882	12307
377	PA_chr01_G000558	2636	3				OG0018483	no_significant_change	0.00832024	58802	0.6702	13044	0.9658	13885	-1.1014	16911	1.2888	14962
378	PA_chr01_G000559	143683	5				OG0010447	no_significant_change	1	31852	0.7969	11841	-2.2753	7196	2.8941	5955	2.729	6860
379	PA_chr01_G000560	681	1				OG0031750	no_significant_change		46757	0.7076	12692	1.4225	10951	1.8268	11853	1.8671	11261
380	PA_chr01_G000563	3658	5				OG0018483	no_significant_change	1	47023	0.9054	10812	0.5744	17047	2.4636	8191	1.9144	10973
381	PA_chr01_G000564	848	1				OG0031750	no_significant_change		51925	1.1718	8363	0.3704	18651	1.2081	16164	2.3338	8747
382	PA_chr01_G000565	3477	6				OG0010447	no_significant_change	0.17869	49918	1.1718	8363	-0.2774	19288	2.3627	8744	1.5006	13523
383	PA_chr01_G000566	4137	5				OG0010447	no_significant_change	1	49623	0.9693	10202	0.5534	17218	-2.1673	9812	1.6744	12391
384	PA_chr01_G000567	212634	4	protein UNUSUAL FLORAL		F-box domain	OG0020221	no_significant_change	1	19855	0.9747	10153	2.7228	5621	-4.8128	659	3.5851	3422
385	PA_chr01_G000568	1395	1	protein UNUSUAL FLORAL		F-box domain	OG0020221	no_significant_change	1	16957	0	16957
386	PA_chr01_G000569	4134	2	protein UNUSUAL FLORAL		F-box domain	OG0020221	no_significant_change	0.000351169	75736	0.552	14156	0.0345	20257	-0.2056	20897	-0.3523	20426
387	PA_chr01_G000570	1481	1	protein UNUSUAL FLORAL		F-box domain	OG0020221	no_significant_change	1	13066	0.668	13066
388	PA_chr01_G000571	870	1	F-box-like			OG0020221	no_significant_change	1	16914	0.1033	16914
389	PA_chr01_G000573	1405	1	protein UNUSUAL FLORAL		F-box domain	OG0020221	no_significant_change	1	16957	0	16957
390	PA_chr01_G000574	39406	13	Potassium channel		Ankyrin repeats (3 copies);KHA, dimerisation domain of potassium ion channel;Ion transport protein;Cyclic nucleotide-binding domain	OG0000384	no_significant_change	1	26233	1.4177	6306	-1.7126	9480	-2.8539	6164	3.3341	4283
391	PA_chr01_G000576	7862	4	Protein of unknown function (DUF674)		Protein of unknown function (DUF674)	OG0000253	no_significant_change	1	60429	0.7635	12162	-0.6577	16353	1.0573	17210	1.3252	14704
392	PA_chr01_G000577	2401	1	60S ribosomal protein L7a		Domain of unknown function (DUF4283);Ubiquitin family	OG0011938	no_significant_change	1	14551	0.5087	14551
393	PA_chr01_G000579	127099	1	Integral peroxisomal membrane peroxin		C2 domain	OG0013618	no_significant_change	0.47797	10034	1.0472	9482	7.2822	211	-5.9721	109	5.8863	232
394	PA_chr01_G000580	17769	6	Inactive rhomboid protein		Rhomboid family	OG0000746	no_significant_change	1	48149	1.9782	2943	-0.7542	15553	-1.3236	15349	-1.3868	14304
395	PA_chr01_G000581	84480	6	Inactive rhomboid protein		Rhomboid family	OG0000746	no_significant_change	1	67514	1.0472	9482	0.4701	17879	-0.3738	20511	-0.5363	19642
396	PA_chr01_G000585	2000	1	Integral peroxisomal membrane peroxin		C2 domain	OG0013618	no_significant_change		15243	0.4295	15243
397	PA_chr01_G000586	519	1							13795	0.5905	13795
398	PA_chr01_G000589	561	1							2943	1.9782	2943
399	PA_chr01_G000592	21811	3	Belongs to the GroES chaperonin family		Chaperonin 10 Kd subunit	OG0003020	no_significant_change	1	12378	1.0763	9214	4.1469	2276	4.9145	568	5.6678	320
400	PA_chr01_G000593	42785	8	Chaperone protein DNAj		DnaJ domain	OG0004829	no_significant_change		36860	1.454	6013	-1.4339	10885	1.9643	10983	2.2912	8979
401	PA_chr01_G000594	54696	2	expressed protein		Protein BYPASS1-related	OG0003262	no_significant_change	1	13547	2.7415	1150	1.9224	8603	4.0019	1818	-4.1258	1976
402	PA_chr01_G000595	1301	1				OG0043665	no_significant_change		47460	1.3091	7188	0.399	18429	1.6878	12782	2.2756	9061
403	PA_chr01_G000599	1539	1							51447	1.6124	4914	-0.7122	15908	1.4717	14302	1.0911	16323
404	PA_chr01_G000601	4213	4	TMV resistance protein N-like		TIR domain;NB-ARC domain	OG0000157	no_significant_change		19052	0.981	10094	3.0567	4626	-4.0019	1818	-3.9	2514
405	PA_chr01_G000602	1303	1	disease resistance protein			OG0000157	no_significant_change		9022	1.0971	9022
406	PA_chr01_G000605	52849	5	TMV resistance protein N-like		TIR domain;NB-ARC domain	OG0000157	no_significant_change		28270	0.9572	10314	-2.5446	6198	-2.6585	7175	-3.2531	4583
407	PA_chr01_G000607	284524	15	Nucleolar complex protein 4 homolog		CBF/Mak21 family	OG0004801	no_significant_change		22015	1.1121	8889	4.1666	2234	-2.8795	6031	-3.18	4861
408	PA_chr01_G000608	21137	5	Interconversion of serine and glycine		Serine hydroxymethyltransferase	OG0001918	no_significant_change	1	31834	0.7516	12275	-2.9233	5025	-2.5284	7851	-2.767	6683
409	PA_chr01_G000609	772	1				OG0014226	no_significant_change	1	45082	0.7188	12587	-1.8998	8688	2.0038	10758	1.572	13049
410	PA_chr01_G000612	681	1				OG0043666	no_significant_change		7087	1.3214	7087
411	PA_chr01_G000613	454	1	At4g38062-like			OG0002031	expanded	1	16339	0.277	16339
412	PA_chr01_G000614	1431	1				OG0016224	no_significant_change	1	16339	0.277	16339
413	PA_chr01_G000615	1367	1							60107	1.0059	9865	0.3693	18660	-1.2189	16087	-1.2107	15495
414	PA_chr01_G000618	4158	2							50442	0.7439	12347	1.0644	13154	1.4844	14215	1.9571	10726
415	PA_chr01_G000619	5359	4	TMV resistance protein N-like		TIR domain;NB-ARC domain	OG0003838	no_significant_change	1	60166	0.724	12539	0.8962	14418	-0.9062	18134	-1.2709	15075
416	PA_chr01_G000620	5038	4	TMV resistance protein N-like		TIR domain;NB-ARC domain	OG0003838	no_significant_change	0.00122107	18570	1.0893	9094	-3.2093	4204	3.3936	3694	-4.3528	1578
417	PA_chr01_G000622	63793	6	Transcription factor		Helix-loop-helix DNA-binding domain	OG0002367	no_significant_change	0.921828	19240	2.5624	1424	-1.93	8570	-2.9246	5795	-3.5748	3451
418	PA_chr01_G000624	5388	2	Leucine rich repeat		Leucine rich repeat;Protein tyrosine and serine/threonine kinase	OG0002507	no_significant_change	0.0131284	52009	0.5525	14151	0.5462	17276			-0.3052	20582
419	PA_chr01_G000625	1982	1	inactive receptor kinase		Leucine rich repeat;Leucine Rich Repeat	OG0016956	no_significant_change		14151	0.5525	14151
420	PA_chr01_G000626	15668	2	Leucine rich repeat		Protein tyrosine and serine/threonine kinase	OG0002507	no_significant_change	4.01299e-10	53498	0.928	10590	0.7095	15927	1.5543	13696	-1.5358	13285
421	PA_chr01_G000627	1881	1			Leucine rich repeat;Leucine Rich repeat	OG0026023	no_significant_change		72116	0.7392	12392	-0.2708	19330	-0.6406	19555	-0.2102	20839
422	PA_chr01_G000628	612656	4	Leucine rich repeat		Leucine rich repeat;Leucine rich repeat N-terminal domain;Protein tyrosine and serine/threonine kinase;Leucine Rich Repeat	OG0002507	no_significant_change	0.315628	10545	1.4864	5777	5.0882	1139	-4.066	1689	4.144	1940
423	PA_chr01_G000636	4874	3	Leucine-rich repeat		Leucine rich repeat;Leucine Rich Repeat;Protein kinase domain	OG0002507	no_significant_change	1	67953	0.9466	10412	-0.3656	18686	-0.4949	20124	-0.7178	18731
424	PA_chr01_G000637	5184	4	TMV resistance protein N-like		Leucine rich repeat;TIR domain;NB-ARC domain	OG0011145	no_significant_change	1.43394e-07	45653	1.5519	5325	1.2033	12208	1.2739	15692	1.6684	12428
425	PA_chr01_G000638	1135	2			Leucine Rich Repeat	OG0011145	no_significant_change	0.691945	12060	0.7738	12060
426	PA_chr01_G000645	5061	2	Leucine-rich repeat		Leucine rich repeat;Protein tyrosine and serine/threonine kinase;Leucine Rich Repeat	OG0002507	no_significant_change	1	67256	0.8023	11789	0.6199	16667	-0.5835	19800	-0.6652	19000
427	PA_chr01_G000646	586	1				OG0018484	no_significant_change	0.391532	16819	0.1637	16819
428	PA_chr01_G000647	335863	27	Pre-mRNA-splicing factor ATP-dependent RNA helicase		Oligonucleotide/oligosaccharide-binding (OB)-fold;Helicase associated domain (HA2);Helicase conserved C-terminal domain	OG0002725	no_significant_change		25789	0.847	11367	3.458	3621	2.8714	6067	3.2154	4734
429	PA_chr01_G000650	655	1				OG0043667	no_significant_change		12285	0.7506	12285
430	PA_chr01_G000651	3735	4	TMV resistance protein N-like		TIR domain;NB-ARC domain;Leucine Rich Repeat	OG0043668	no_significant_change		13194	0.6544	13194
431	PA_chr01_G000652	3803	1			BspA type Leucine rich repeat region (6 copies);Leucine Rich Repeat	OG0014803	no_significant_change	0.0433186	15449	0.4035	15449
432	PA_chr01_G000654	84686	2	TMV resistance protein N-like		TIR domain	OG0006182	no_significant_change	1	13669	0.6038	13669
433	PA_chr01_G000655	641	1							14093	0.5587	14093
434	PA_chr01_G000656	424	1							14835	0.4765	14835
435	PA_chr01_G000657	1581	1			Leucine rich repeat;Leucine Rich Repeat	OG0022464	no_significant_change	0.0251907	13669	0.6038	13669
436	PA_chr01_G000658	3420	4	TMV resistance protein N-like		TIR domain;NB-ARC domain;Leucine Rich Repeat	OG0011145	no_significant_change	1	16957	0	16957
437	PA_chr01_G000659	3386	4	TMV resistance protein N-like		Leucine rich repeat;TIR domain;NB-ARC domain	OG0011145	no_significant_change	1	16041	0.324	16041
438	PA_chr01_G000661	4704	4	TMV resistance protein N-like		TIR domain;NB-ARC domain;Leucine Rich Repeat	OG0000157	no_significant_change		41283	0.4198	15321	2.3037	7095	-2.1674	9811	-2.2772	9056
439	PA_chr01_G000662	690	1							76681	0.4198	15321	0.17	19863	-0.3413	20602	-0.1854	20895
440	PA_chr01_G000663	1432	1			Leucine rich repeat;Leucine Rich Repeat	OG0011145	no_significant_change	1	16482	0.2505	16482
441	PA_chr01_G000664	2270	1	Splicing factor, suppressor of white-apricot homolog		Alternative splicing regulator	OG0005660	no_significant_change	0.000899735	12564	0.7213	12564
442	PA_chr01_G000665	3581	4	TMV resistance protein N-like		TIR domain;NB-ARC domain;Leucine Rich Repeat	OG0011145	no_significant_change	0.000438916	74992	0.3589	15811	0.4572	17982	-0.3642	20542	0.2809	20657
443	PA_chr01_G000666	3796	4	TMV resistance protein N-like		Leucine Rich repeats (2 copies);TIR domain;NB-ARC domain;Leucine Rich Repeat	OG0043668	no_significant_change		69975	0.6023	13682	0.4282	18215	-0.8273	18606	-0.5728	19472
444	PA_chr01_G000667	4298	4	positive regulation of cell-substrate adhesion		BspA type Leucine rich repeat region (6 copies);TIR domain;NB-ARC domain	OG0011145	no_significant_change	1.18539e-06	74066	0.4984	14644	-0.4875	17734	-0.2789	20760	0.168	20928
445	PA_chr01_G000668	39777	4	TMV resistance protein N-like		Leucine rich repeat;TIR domain;NB-ARC domain;Leucine Rich Repeat	OG0022464	no_significant_change	0.986763	30393	0.5923	13778			-1.1445	16615
446	PA_chr01_G000669	4619	4	TMV resistance protein N-like		TIR domain;NB-ARC domain;Leucine Rich Repeat	OG0011145	no_significant_change	0.624053	10629	0.924	10629
447	PA_chr01_G000670	1325	3	Auxin-responsive GH3 family protein		GH3 auxin-responsive promoter				9337	1.0628	9337
448	PA_chr01_G000671	3472	4	TMV resistance protein N-like		Leucine rich repeat;TIR domain;NB-ARC domain;Leucine Rich Repeat	OG0011145	no_significant_change	1	12516	0.7263	12516
449	PA_chr01_G000672	4156	4	Belongs to the disease resistance NB-LRR family		TIR domain;NB-ARC domain	OG0000157	no_significant_change		71103	0.4027	15455	-0.1146	20079	-0.9956	17613	-0.8448	17956
450	PA_chr01_G000673	1375	1							15192	0.4353	15192
451	PA_chr01_G000674	378	1							70368	0.6855	12903	0.3708	18649	-0.6309	19599	-0.625	19217
452	PA_chr01_G000675	1699	4				OG0004543	no_significant_change	1	68640	0.5567	14113	0.4873	17736	-0.558	19894	-1.0098	16897
453	PA_chr01_G000676	566	1				OG0022466	no_significant_change	1	13473	0.6248	13473
454	PA_chr01_G000677	900	1				OG0011726	no_significant_change	1	14407	0.5247	14407
455	PA_chr01_G000678	6783	3	Structural maintenance of chromosomes			OG0005072	no_significant_change	0.000118447	42850	0.7406	12379	-1.3328	11459	-2.1364	9976	-2.2804	9036
456	PA_chr01_G000679	20150	2	GTP-BINDING protein		beta-glucosidase 2, glycosyl-hydrolase family 116 N-term;Ras family	OG0030623	no_significant_change		41166	0.7406	12379	-1.6472	9775	-2.1364	9976	-2.2804	9036
457	PA_chr01_G000680	1462	3			NB-ARC domain				58216	0.5792	13900	1.004	13589	-1.4278	14613	-1.1204	16114
458	PA_chr01_G000681	2466	1	disease resistance protein		Leucine Rich Repeat	OG0014803	no_significant_change	0.00387589	16184	0.3014	16184
459	PA_chr01_G000683	62670	3	TMV resistance protein N-like		TIR domain	OG0043669	no_significant_change		13772	0.5929	13772
460	PA_chr01_G000687	3468	3	TMV resistance protein N-like		Leucine Rich Repeat	OG0000157	no_significant_change		13772	0.5929	13772
461	PA_chr01_G000688	5229	3	TMV resistance protein N-like		BspA type Leucine rich repeat region (6 copies);NB-ARC domain	OG0005324	no_significant_change		70081	0.5924	13777	-0.3186	19018	-0.5802	19815	-0.9224	17471
462	PA_chr01_G000690	1838	3	Belongs to the class I-like SAM-binding methyltransferase superfamily. Cation-independent O- methyltransferase family		O-methyltransferase domain	OG0000032	no_significant_change	0.18972	14300	0.5362	14300
463	PA_chr01_G000691	50923	5	Belongs to the peptidase S10 family		O-methyltransferase domain;Serine carboxypeptidase	OG0010348	no_significant_change	1.77636e-14	45764	0.7213	12564	-0.9131	14282	-2.4418	8312	1.9788	10606
464	PA_chr01_G000692	6337	5				OG0011146	no_significant_change	0.113951	12564	0.7213	12564
465	PA_chr01_G000693	2212	1				OG0012697	no_significant_change	1	12564	0.7213	12564
466	PA_chr01_G000694	509	1	Glycosyltransferase like family 2			OG0014167	no_significant_change	1	12564	0.7213	12564
467	PA_chr01_G000696	4121	1			Leucine Rich Repeat	OG0000157	no_significant_change		15997	0.3311	15997
468	PA_chr01_G000697	3387	3	TMV resistance protein N-like		Leucine Rich Repeat	OG0014803	no_significant_change	0.884239	15105	0.4458	15105
469	PA_chr01_G000698	49376	6	acetyltransferase component of pyruvate dehydrogenase		e3 binding domain;Biotin-requiring enzyme;2-oxoacid dehydrogenases acyltransferase (catalytic domain)	OG0002824	no_significant_change	1	22708	0.9998	9924	3.4018	3755	-3.4578	3449	-3.0187	5580
470	PA_chr01_G000700	2291	1	Belongs to the UDP-glycosyltransferase family		UDP-glucoronosyl and UDP-glucosyl transferase	OG0000053	no_significant_change	1	64794	0.6825	12932	0.7238	15812	-1.2096	16152	0.4822	19898
471	PA_chr01_G000701	1899	1	UDP-glycosyltransferase 91C1-like		UDP-glucoronosyl and UDP-glucosyl transferase	OG0000053	no_significant_change	1	13948	0.5738	13948
472	PA_chr01_G000702	9716	2	UDP-glycosyltransferase 91C1-like		UDP-glucoronosyl and UDP-glucosyl transferase	OG0000053	no_significant_change	1	11779	0.8037	11779
473	PA_chr01_G000703	1085	1	gag-polypeptide of LTR copia-type		gag-polypeptide of LTR copia-type	OG0003131	no_significant_change	1	7013	1.33	7013
474	PA_chr01_G000704	1814	1	Belongs to the UDP-glycosyltransferase family			OG0000053	no_significant_change	1	13431	0.6291	13431
475	PA_chr01_G000705	1672	1	Belongs to the UDP-glycosyltransferase family		UDP-glucoronosyl and UDP-glucosyl transferase	OG0000053	no_significant_change	1	12512	0.7267	12512
476	PA_chr01_G000706	3049	1	UDP-glycosyltransferase 91C1-like		UDP-glucoronosyl and UDP-glucosyl transferase	OG0000053	no_significant_change	1	12824	0.6938	12824
477	PA_chr01_G000707	5379	1				OG0003948	no_significant_change	1	14394	0.5261	14394
478	PA_chr01_G000715	3582	1	PsaA and PsaB bind P700, the primary electron donor of photosystem I (PSI), as well as the electron acceptors A0, A1 and FX. PSI is a plastocyanin-ferredoxin oxidoreductase, converting photonic excitation into a charge separation, which transfers an electron from the donor P700 chlorophyll pair to the spectroscopically characterized acceptors A0, A1, FX, FA and FB in turn. Oxidized P700 is reduce…	psaB	Photosystem I psaA/psaB protein	OG0000231	expanded		14410	0.5243	14410
479	PA_chr01_G000716	1012	3				OG0018485	no_significant_change	1	16677	0.2074	16677
480	PA_chr01_G000717	1253	2				OG0012922	no_significant_change	5.32925e-10	16677	0.2074	16677
481	PA_chr01_G000718	1546	3	Belongs to the TRAFAC class myosin-kinesin ATPase superfamily. Kinesin family			OG0012922	no_significant_change	1	16677	0.2074	16677
482	PA_chr01_G000719	8547	10	Protein TIME FOR			OG0008606	no_significant_change	1	40878	1.0966	9026	1.041	13320	-2.2349	9442	-2.2704	9090
483	PA_chr01_G000720	191833	8	5'-methylthioadenosine S-adenosylhomocysteine nucleosidase		Phosphorylase superfamily	OG0006629	no_significant_change		13424	0.9694	10201	5.4366	900	-4.1474	1528	-4.978	795
484	PA_chr01_G000723	3463	1	DYW family of nucleic acid deaminases		DYW family of nucleic acid deaminases;PPR repeat family;PPR repeat	OG0000000	no_significant_change		52728	0.9317	10556	-0.6325	16561	-1.4621	14371	-1.871	11240
485	PA_chr01_G000724	3297	1				OG0014227	no_significant_change	1	13767	0.5934	13767
486	PA_chr01_G000725	116523	5	RESISTANCE protein		TIR domain;NB-ARC domain	OG0000021	no_significant_change		19939	1.4704	5882	-2.7405	5560	-3.3603	3826	-3.231	4671
487	PA_chr01_G000726	827	1				OG0043672	no_significant_change		8432	1.1639	8432
488	PA_chr01_G000727	1134	2							14409	0.5244	14409
489	PA_chr01_G000730	3312	1	Pentatricopeptide repeat-containing protein		DYW family of nucleic acid deaminases;PPR repeat family;PPR repeat	OG0000000	no_significant_change		57809	0.5973	13729	0.2894	19209	1.8145	11936	-1.5904	12935
490	PA_chr01_G000731	170035	2	Pentatricopeptide repeat-containing protein		DYW family of nucleic acid deaminases;PPR repeat family;PPR repeat	OG0000000	no_significant_change		31370	0.837	11460	-2.1055	7837	-2.805	6412	2.9964	5661
491	PA_chr01_G000732	3158	1	Pentatricopeptide repeat-containing protein		DYW family of nucleic acid deaminases;PPR repeat family;PPR repeat	OG0000000	no_significant_change		52868	0.6379	13349	-1.248	11936	-1.3902	14880	-1.6256	12703
492	PA_chr01_G000733	3151	1	Pentatricopeptide repeat-containing protein		DYW family of nucleic acid deaminases;Pentatricopeptide repeat domain;PPR repeat family;PPR repeat	OG0000000	no_significant_change		46454	0.6647	13097	-1.3988	11068	-1.735	12474	-2.1221	9815
493	PA_chr01_G000734	2906	1	Pentatricopeptide repeat-containing protein		DYW family of nucleic acid deaminases;PPR repeat family;PPR repeat	OG0000000	no_significant_change		59625	0.5965	13737	0.7044	15971	-1.2641	15764	-1.4098	14153
494	PA_chr01_G000735	3732	1	Pentatricopeptide repeat-containing protein		DYW family of nucleic acid deaminases;PPR repeat family;PPR repeat	OG0000000	no_significant_change		48992	0.7546	12247	0.8926	14447	1.818	11911	2.0165	10387
495	PA_chr01_G000736	2512	3	chalcone-flavanone isomerase family protein			OG0003562	no_significant_change	0.210667	62781	0.423	15296	0.3414	18856	1.5988	13383	1.2461	15246
496	PA_chr01_G000737	332753	18	UDP-sugar pyrophosphorylase	USP	UTP--glucose-1-phosphate uridylyltransferase	OG0008450	no_significant_change		28014	0.574	13946	3.1978	4227	3.0552	5193	3.2363	4648
497	PA_chr01_G000739	25546	5	GDSL esterase lipase		GDSL-like Lipase/Acylhydrolase	OG0000128	expanded		39670	0.6688	13058	1.1704	12425	2.2292	9471	-3.2198	4716
498	PA_chr01_G000741	173938	9	Protein of unknown function (DUF616)		Protein of unknown function (DUF616)	OG0002764	no_significant_change	1	16786	0.6814	12942	4.051	2438	5.6123	191	4.6034	1215
499	PA_chr01_G000742	85658	4	mTERF		mTERF	OG0011086	no_significant_change		34390	0.9335	10538	-1.5263	10403	2.7384	6766	2.767	6683
500	PA_chr01_G000745	1917	4	Gibberellin regulated protein		Gibberellin regulated protein	OG0000487	no_significant_change	1	55901	0.7645	12153	0.8588	14709	-1.5139	13990	-1.2749	15049
501	PA_chr01_G000746	2824	4	Gibberellin regulated protein		Gibberellin regulated protein	OG0000487	no_significant_change	1	40744	1.0471	9483	-2.1075	7825	1.8461	11733	1.7888	11703
502	PA_chr01_G000747	1746	3	Gibberellin-regulated protein		Gibberellin regulated protein	OG0000487	no_significant_change	1	60130	0.8754	11095	0.4595	17966	-1.1649	16464	-1.3407	14605
503	PA_chr01_G000748	2437	4	Gibberellin-regulated protein		Gibberellin regulated protein	OG0000487	no_significant_change	1	12768	0.7	12768
504	PA_chr01_G000749	2130	5	Gibberellin-regulated protein		Gibberellin regulated protein	OG0000487	no_significant_change	1	73710	0.7956	11854	0.0052	20311	-0.0917	21047	-0.3302	20498
505	PA_chr01_G000750	26452	4	Gibberellin-regulated protein		Gibberellin regulated protein	OG0000487	no_significant_change	1	65177	0.9356	10519	0.4789	17803	-0.8166	18663	-0.808	18192
506	PA_chr01_G000752	2130	1							70968	0.4003	15474	0.3556	18766	-0.8242	18625	-0.8227	18103
507	PA_chr01_G000754	1884	4	Gibberellin-regulated protein		Gibberellin regulated protein	OG0000487	no_significant_change	1	45259	0.7079	12689	-0.5318	17386	-2.4408	8318	-2.7276	6866
508	PA_chr01_G000755	2139	4	Gibberellin-regulated protein		Gibberellin regulated protein	OG0000487	no_significant_change	1	54187	0.6106	13606	-0.5378	17339	-1.8381	11781	1.8303	11461
509	PA_chr01_G000756	327526	16	E3 ubiquitin-protein ligase		Cysteine rich domain with multizinc binding regions;PBZ domain;Zinc finger, C3HC4 type (RING finger)	OG0006464	no_significant_change		16599	0.9937	9980	-4.6737	1555	3.982	1867	3.6506	3197
510	PA_chr01_G000759	1625	1	belongs to the protein kinase superfamily		Protein tyrosine and serine/threonine kinase	OG0001493	no_significant_change		13457	0.6264	13457
511	PA_chr01_G000760	25189	4	Alkaline neutral invertase		Alkaline and neutral invertase	OG0001085	no_significant_change	0.468873	39792	1.0348	9600	-0.7701	15424	-2.4878	8063	-2.7634	6705
512	PA_chr01_G000762	6929	1	transcription factor		TCP family transcription factor	OG0000220	no_significant_change	1	23640	1.4564	5995	1.5456	10293	-3.4456	3496	3.4521	3856
513	PA_chr01_G000763	559	1							40118	1.4564	5995	1.2896	11696	-0.9984	17592	3.1866	4835
514	PA_chr01_G000764	26549	1	Belongs to the ubiquitin-conjugating enzyme family		Ubiquitin-conjugating enzyme				13344	1.3496	6851	3.3314	3913	-4.2951	1249	-4.5124	1331
515	PA_chr01_G000765	442	1							63919	0.5336	14324	-0.2273	19584	-1.378	14966	1.2754	15045
516	PA_chr01_G000766	57429	2	ADP binding		Leucine Rich Repeat				16532	0.9209	10660	3.4379	3671	-4.6767	789	-4.4565	1412
517	PA_chr01_G000768	1265	1				OG0017208	no_significant_change	0.435317	51914	0.8519	11322	0.9239	14199	-1.3748	14991	-1.8413	11402
518	PA_chr01_G000769	3050	3	TMV resistance protein N-like		TIR domain;NB-ARC domain	OG0003577	no_significant_change	1.39498e-05	45762	0.8519	11322	0.9239	14199	-1.9717	10940	-2.2292	9301
519	PA_chr01_G000770	770	1				OG0022467	no_significant_change	1	11322	0.8519	11322
520	PA_chr01_G000771	5082	4	TMV resistance protein N-like		TIR domain;NB-ARC domain;Leucine Rich Repeat	OG0003577	no_significant_change	0.00379052	39112	0.8919	10938	2.3547	6888	-1.9184	11275	-2.0861	10011
521	PA_chr01_G000772	2328	1							39133	0.8919	10938	2.3508	6909	-1.9184	11275	-2.0861	10011
522	PA_chr01_G000773	574	1				OG0011525	no_significant_change		56772	0.8919	10938	0.7517	15575	-1.2198	16081	-1.4059	14178
523	PA_chr01_G000774	3789	4	TMV resistance protein N-like		TIR domain;NB-ARC domain	OG0016225	no_significant_change		55108	0.7484	12307	0.7936	15237	-1.4574	14409	-1.5563	13155
524	PA_chr01_G000775	1106	2							60178	0.7484	12307	0.7936	15237	0.9853	17665	1.2877	14969
525	PA_chr01_G000776	86207	3	Protein kinase superfamily protein			OG0003875	no_significant_change	1	24053	0.7323	12458	3.3626	3837	-3.5733	3020	-3.2145	4738
526	PA_chr01_G000779	2294	1			F-box domain	OG0012257	no_significant_change		51534	0.4994	14635	0.9186	14239	-2.4265	8395	-1.3926	14265
527	PA_chr01_G000782	2784	2	At4g38062-like			OG0002031	expanded	1	16957	0	16957
528	PA_chr01_G000783	936	1	At4g38062-like			OG0011939	no_significant_change	1	16957	0	16957
529	PA_chr01_G000784	3030	1	domain-containing protein			OG0012143	no_significant_change	1	16957	0	16957
530	PA_chr01_G000785	4731	3	TMV resistance protein N-like		Leucine rich repeat	OG0011727	no_significant_change	1	9332	1.0633	9332
531	PA_chr01_G000786	3255	3	RESISTANCE protein		TIR domain;NB-ARC domain	OG0011727	no_significant_change	1	28400	0.346	15901	3.2744	4051	-3.2792	4181	-3.3386	4267
532	PA_chr01_G000787	1115	1	regulation of response to stimulus			OG0011727	no_significant_change	1	57765	0.346	15901	-0.9868	13722	-1.1387	16659	1.8269	11483
533	PA_chr01_G000788	936	1	Auxin-induced protein		Auxin responsive protein	OG0000015	expanded	1	53290	0.5207	14442	0.5381	17337	1.5489	13735	2.5364	7776
534	PA_chr01_G000789	280	1				OG0031751	no_significant_change		15185	0.436	15185
535	PA_chr01_G000790	603	1	Auxin-induced protein		Auxin responsive protein	OG0000015	expanded	1	57762	0.5895	13805	0.8038	15156	-1.3454	15197	1.488	13604
536	PA_chr01_G000791	1460	1	auxin-induced protein		Auxin responsive protein	OG0000015	expanded	1	53377	1.0349	9599	0.5716	17071	-1.3474	15181	-1.8178	11526
537	PA_chr01_G000792	4490	1	Pentatricopeptide repeat-containing protein		DYW family of nucleic acid deaminases;PPR repeat family;PPR repeat	OG0000000	no_significant_change		34265	0.6995	12772	2.1118	7810	2.5676	7651	2.9123	6032
538	PA_chr01_G000793	3418	1	Pentatricopeptide repeat-containing protein		DYW family of nucleic acid deaminases;PPR repeat family;PPR repeat	OG0000000	no_significant_change		45713	0.7199	12577	1.4578	10758	1.5502	13726	2.3539	8652
539	PA_chr01_G000794	850	1	Auxin responsive protein		Auxin responsive protein	OG0000015	expanded	1	13958	0.5728	13958
540	PA_chr01_G000795	863	1	auxin-induced protein		Auxin responsive protein	OG0000015	expanded	1	14154	0.5522	14154
541	PA_chr01_G000796	856	1	Auxin responsive protein		Auxin responsive protein	OG0000015	expanded	1	15009	0.4568	15009
542	PA_chr01_G000797	1068	1	auxin-induced protein		Auxin responsive protein	OG0000015	expanded	1	56229	0.5858	13838	-0.5078	17574	-1.5812	13511	-1.8596	11306
543	PA_chr01_G000798	671	1				OG0002979	no_significant_change	1	16957	0	16957
544	PA_chr01_G000800	5498	2	Auxin responsive protein		Auxin responsive protein	OG0000015	expanded	1	32607	0.9572	10314	-2.3882	6747	3.1287	4852	-1.9622	10694
545	PA_chr01_G000804	472	1							57791	0.9273	10597	0.6877	16109	1.1478	16591	1.3579	14494
546	PA_chr01_G000806	944	1	Auxin-induced protein 15A-like		Auxin responsive protein	OG0000015	expanded	1	69530	0.7543	12249	0.189	19772	-0.9739	17737	-0.5089	19772
547	PA_chr01_G000807	629	1	auxin-induced protein		Auxin responsive protein	OG0000015	expanded	1	61892	0.5012	14618	0.6636	16304	-1.2148	16114	1.3038	14856
548	PA_chr01_G000808	970	1	auxin-induced protein		Auxin responsive protein	OG0000015	expanded	1	63585	1.0537	9420	0.423	18250	1.098	16934	-0.6693	18981
549	PA_chr01_G000812	1577	1	Auxin responsive protein		Auxin responsive protein	OG0000015	expanded	1	50286	1.4205	6280	-1.1307	12688	1.279	15662	1.1861	15656
550	PA_chr01_G000813	970	1	auxin-induced protein		Auxin responsive protein	OG0000015	expanded	1	48754	0.9251	10619	-1.4571	10760	-1.9213	11254	1.1192	16121
551	PA_chr01_G000814	626	1	auxin-induced protein		Auxin responsive protein	OG0000015	expanded	1	13177	0.6561	13177
552	PA_chr01_G000815	840	1	Auxin responsive protein		Auxin responsive protein	OG0000015	expanded	1	59370	1.4026	6430	-1.027	13423	0.8058	18732	-0.2315	20785
553	PA_chr01_G000819	725	1	Auxin responsive protein		Auxin responsive protein	OG0000015	expanded	1	69540	0.7784	12015	0.2896	19207	0.638	19570	0.7143	18748
554	PA_chr01_G000820	757	1	Auxin responsive protein		Auxin responsive protein	OG0000015	expanded	1	71884	0.7786	12014	0.3526	18785	-0.4494	20286	-0.226	20799
555	PA_chr01_G000821	664	1	auxin-induced protein		Auxin responsive protein	OG0000015	expanded	1	52164	0.8707	11140	-0.6013	16813	-1.719	12577	-1.7994	11634
556	PA_chr01_G000822	840	1	auxin-induced protein		Auxin responsive protein	OG0000015	expanded	1	66324	0.5875	13822	0.7151	15883	-0.8342	18571	-0.8309	18048
557	PA_chr01_G000823	1666	3	Belongs to the class I-like SAM-binding methyltransferase superfamily. Cation-independent O- methyltransferase family		O-methyltransferase domain	OG0000032	no_significant_change	1	11916	0.7891	11916
558	PA_chr01_G000824	687	1				OG0031753	no_significant_change		11916	0.7891	11916
559	PA_chr01_G000825	757	1	Belongs to the class I-like SAM-binding methyltransferase superfamily. Cation-independent O- methyltransferase family		O-methyltransferase domain	OG0000032	no_significant_change	0	14892	0.4702	14892
560	PA_chr01_G000826	1064	1				OG0022468	no_significant_change	1	14622	0.5008	14622
561	PA_chr01_G000827	11343	1				OG0014804	no_significant_change	1	14622	0.5008	14622
562	PA_chr01_G000828	4455	3	NB-ARC domain		TIR domain;NB-ARC domain	OG0026025	no_significant_change	0.00171862	55578	0.7344	12438	0.7658	15459	-1.369	15033	-1.6337	12648
563	PA_chr01_G000831	2654	4	TMV resistance protein N-like		TIR domain;NB-ARC domain	OG0031754	no_significant_change		32375	0.7701	12097	1.9631	8417	2.9649	5604	2.862	6257
564	PA_chr01_G000832	4179	2	TMV resistance protein N-like		TIR domain;NB-ARC domain	OG0026025	no_significant_change	9.71068e-06	41281	0.7149	12625	-1.0414	13317	-2.3993	8541	-2.7426	6798
565	PA_chr01_G000834	3444	9	TMV resistance protein N-like		TIR domain				43605	0.8958	10901	-1.5935	10049	-1.9029	11372	1.8632	11283
566	PA_chr01_G000836	1015	1	Auxin responsive protein		Auxin responsive protein	OG0000015	expanded	1	64720	0.8287	11540	0.5536	17216	1.1201	16783	0.6322	19181
567	PA_chr01_G000837	5093	1	Pentatricopeptide repeat-containing protein		DYW family of nucleic acid deaminases;PPR repeat family;PPR repeat	OG0000000	no_significant_change		48714	0.7506	12285	-0.8352	14896	-1.7261	12529	-2.2864	9004
568	PA_chr01_G000838	811	1	Aminoacyl-tRNA editing domain						64159	0.7506	12285	0.3805	18576	1.3723	15006	0.7911	18292
569	PA_chr01_G000839	3915	1	Pentatricopeptide repeat-containing protein		Pentatricopeptide repeat domain;PPR repeat family;PPR repeat	OG0000000	no_significant_change		61416	0.7475	12314	0.7568	15532	-1.2327	15981	-0.9045	17589
570	PA_chr01_G000840	993	1	Auxin responsive protein		Auxin responsive protein	OG0000015	expanded	1	68563	0.617	13544	-0.1811	19812	-0.7996	18767	-1.0738	16440
571	PA_chr01_G000841	1055	1	Auxin-induced protein		Auxin responsive protein	OG0000015	expanded	1	63142	0.8578	11266	0.552	17229	-0.5832	19801	1.3051	14846
572	PA_chr01_G000842	19097	2	Auxin responsive protein		Auxin responsive protein	OG0000015	expanded	1	40719	1.1304	8728	-1.4296	10915	1.9963	10797	-2.0361	10279
573	PA_chr01_G000843	1011	1	Auxin responsive protein		Auxin responsive protein	OG0000015	expanded	1	44197	1.1559	8505	0.446	18073	-2.4216	8430	2.2525	9189
574	PA_chr01_G000846	873	1	Auxin responsive protein		Auxin responsive protein	OG0000015	expanded	1	13400	0.6324	13400
575	PA_chr01_G000847	581	1	auxin-induced protein		Auxin responsive protein	OG0000015	expanded	1	11917	0.789	11917
576	PA_chr01_G000848	988	1	Auxin responsive protein		Auxin responsive protein	OG0000015	expanded	1	11725	0.8095	11725
577	PA_chr01_G000849	975	1	Auxin responsive protein		Auxin responsive protein	OG0000015	expanded	1	70397	0.959	10297	0.3484	18817	0.0904	21050	0.4045	20233
578	PA_chr01_G000850	1119	1	Auxin responsive protein		Auxin responsive protein	OG0000015	expanded	1	37368	0.9573	10313	-2.6122	5980	-1.9651	10979	-2.0688	10096
579	PA_chr01_G000851	459	1				OG0015460	no_significant_change	1	15087	0.4478	15087
580	PA_chr01_G000854	1103	1	Auxin responsive protein		Auxin responsive protein	OG0000015	expanded	1	45033	0.64	13329	-1.6082	9969	-1.7864	12117	-2.1639	9618
581	PA_chr01_G000855	1051	1	Auxin responsive protein		Auxin responsive protein	OG0000015	expanded	1	54441	1.3647	6722	0.2759	19299	-1.2085	16160	1.6966	12260
582	PA_chr01_G000856	1105	1	Auxin-induced protein 15A-like		Auxin responsive protein	OG0000015	expanded	1	51826	1.1496	8558	-0.2041	19694	-2.3136	9027	-1.3499	14547
583	PA_chr01_G000857	1070	1	Auxin-induced protein 15A-like		Auxin responsive protein	OG0000015	expanded	1	10139	0.9762	10139
584	PA_chr01_G000858	88993	1	Auxin responsive protein		Auxin responsive protein	OG0000015	expanded	1	23591	0.9761	10140	-3.0872	4541	2.9929	5481	-3.5824	3429
585	PA_chr01_G000859	1271	1	Auxin responsive protein		Auxin responsive protein	OG0000015	expanded	1	11129	0.872	11129
586	PA_chr01_G000860	166829	8	MADS-box protein SOC1-like	SOC1	K-box region;SRF-type transcription factor (DNA-binding and dimerisation domain)	OG0000009	no_significant_change	1	31794	0.9406	10471	3.0195	4732	-2.9111	5863	-1.9566	10728
587	PA_chr01_G000864	516	1	ranBP2-type zinc finger protein		Zn-finger in Ran binding protein and others	OG0005665	no_significant_change	1	12864	0.6895	12864
588	PA_chr01_G000865	192606	7	MADS-box protein SOC1-like	SOC1	K-box region;SRF-type transcription factor (DNA-binding and dimerisation domain)	OG0000009	no_significant_change	1	15777	1.4023	6432	3.1936	4239	-4.7651	706	-3.3015	4400
589	PA_chr01_G000866	473	1	ranBP2-type zinc finger protein		Zn-finger in Ran binding protein and others	OG0005665	no_significant_change	1	10585	0.9285	10585
590	PA_chr01_G000869	261863	7	K-box region		K-box region;SRF-type transcription factor (DNA-binding and dimerisation domain)	OG0000009	no_significant_change	1	25417	1.4607	5960	2.2995	7110	-2.906	5895	2.8205	6452
591	PA_chr01_G000870	1471	1	Auxin responsive protein		Auxin responsive protein	OG0000015	expanded	1	45652	1.1872	8224	0.2427	19499	-2.4692	8164	2.1322	9765
592	PA_chr01_G000871	454	1	Auxin responsive protein		Auxin responsive protein	OG0000015	expanded	1	12601	0.7174	12601
593	PA_chr01_G000872	580	1	Auxin responsive protein		Auxin responsive protein	OG0000015	expanded	1	10674	0.9194	10674
594	PA_chr01_G000875	2747	4	Serine threonine-protein kinase		Protein tyrosine and serine/threonine kinase	OG0002648	no_significant_change	1	70059	0.9773	10130	-0.1121	20088	-0.3074	20697	-0.6385	19144
595	PA_chr01_G000876	880	1	Cysteine-rich receptor-like protein kinase		Salt stress response/antifungal	OG0000063	no_significant_change		70059	0.9773	10130	-0.1121	20088	-0.3074	20697	-0.6385	19144
596	PA_chr01_G000877	1052	1	Auxin responsive protein		Auxin responsive protein	OG0000015	expanded	1	65514	1.2449	7721	0.4461	18072	0.6846	19341	0.3662	20380
597	PA_chr01_G000878	666	1	Auxin responsive protein		Auxin responsive protein	OG0000015	expanded	1	9551	1.04	9551
598	PA_chr01_G000879	937	1	Auxin responsive protein		Auxin responsive protein	OG0000015	expanded	1	10075	0.9834	10075
599	PA_chr01_G000880	786	1	Auxin responsive protein		Auxin responsive protein	OG0000015	expanded	1	11819	0.7993	11819
600	PA_chr01_G000881	1183	1	Auxin responsive protein		Auxin responsive protein	OG0000015	expanded	1	11487	0.8342	11487
601	PA_chr01_G000882	1135	1	Auxin responsive protein		Auxin responsive protein	OG0000015	expanded	1	14497	0.5144	14497
602	PA_chr01_G000883	967	1	Auxin responsive protein		Auxin responsive protein	OG0000015	expanded	1	38919	0.6506	13231	0.2343	19549	-4.2078	1406	-3.2155	4733
603	PA_chr01_G000884	41384	3	Glycosyltransferase family 10 (fucosyltransferase) C-term	FUT13	Glycosyltransferase family 10 (fucosyltransferase) C-term	OG0008502	no_significant_change		29103	1.2284	7865	2.4372	6570	-2.9715	5579	-2.2705	9089
604	PA_chr01_G000890	28675	5	Filament-like plant protein, long coiled-coil		Filament-like plant protein, long coiled-coil	OG0001837	no_significant_change	1	16922	1.6814	4466	-3.2878	4013	3.4648	3424	3.141	5019
605	PA_chr01_G000891	1675	1	RESISTANCE protein		BspA type Leucine rich repeat region (6 copies);Leucine Rich Repeat	OG0016024	no_significant_change	0.8074	14658	0.4968	14658
606	PA_chr01_G000892	2807	3	TMV resistance protein N-like		TIR domain;NB-ARC domain	OG0001375	no_significant_change	0.895638	10217	0.9677	10217
607	PA_chr01_G000895	2205	4	belongs to the protein kinase superfamily		Protein kinase domain	OG0002001	no_significant_change	1	16957	0	16957
608	PA_chr01_G000897	6272	5	TMV resistance protein N-like		Leucine rich repeat;BspA type Leucine rich repeat region (6 copies);TIR domain;NB-ARC domain;Leucine Rich Repeat	OG0001375	no_significant_change	0.00924462	9608	1.034	9608
609	PA_chr01_G000898	879	1	Armadillo/beta-catenin-like repeats			OG0002145	no_significant_change	1	13445	0.6277	13445
610	PA_chr01_G000899	1356	1			BspA type Leucine rich repeat region (6 copies)	OG0016024	no_significant_change	1.74988e-08	8852	1.1162	8852
611	PA_chr01_G000900	2733	2	TMV resistance protein N-like		TIR domain;NB-ARC domain	OG0001375	no_significant_change	0.000360356	8852	1.1162	8852
612	PA_chr01_G000901	2753	3	Purple acid phosphatase		Calcineurin-like phosphoesterase	OG0000798	no_significant_change	0.45194	15668	0.3771	15668
613	PA_chr01_G000904	6960	1			BspA type Leucine rich repeat region (6 copies);Leucine Rich Repeat	OG0016024	no_significant_change	1	12023	0.7776	12023
614	PA_chr01_G000905	2985	3	TMV resistance protein N-like		TIR domain;NB-ARC domain	OG0001375	no_significant_change	0.0872615	12023	0.7776	12023
615	PA_chr01_G000911	54134	5	TIR domain		BspA type Leucine rich repeat region (6 copies);TIR domain;NB-ARC domain;Leucine Rich Repeat	OG0001375	no_significant_change	0.256724	61956	0.7918	11889	0.6615	16321	-1.0696	17125	-1.0483	16621
616	PA_chr01_G000912	5788	2	Permease		Permease for cytosine/purines, uracil, thiamine, allantoin	OG0005155	no_significant_change	0.000289622	13922	0.5767	13922
617	PA_chr01_G000913	3653	3	TMV resistance protein N-like		NB-ARC domain;Leucine Rich Repeat	OG0001375	no_significant_change	0.000374585	15292	0.4235	15292
618	PA_chr01_G000914	910	1	TIR domain		TIR domain				15292	0.4235	15292
619	PA_chr01_G000915	1362	2				OG0024831	no_significant_change		14117	0.5563	14117
620	PA_chr01_G000916	1068	1	Serine threonine-protein kinase		PAN-like domain;Protein tyrosine and serine/threonine kinase	OG0031748	no_significant_change		14907	0.4686	14907
621	PA_chr01_G000918	24553	1			BspA type Leucine rich repeat region (6 copies)	OG0016226	no_significant_change		37822	1.0596	9366	1.2149	12136	-2.637	7277	-2.2795	9043
622	PA_chr01_G000919	6514	5	TIR domain		Leucine rich repeat;BspA type Leucine rich repeat region (6 copies);TIR domain;NB-ARC domain	OG0001375	no_significant_change	1	14176	0.5498	14176
623	PA_chr01_G000922	3806	1			BspA type Leucine rich repeat region (6 copies);Leucine Rich Repeat	OG0011727	no_significant_change	0.000889487	47882	0.9182	10686	1.5042	10509	1.5216	13932	1.6172	12755
624	PA_chr01_G000925	3880	2	TIR domain		Leucine Rich Repeat	OG0013764	no_significant_change	0.64689	10028	0.9886	10028
625	PA_chr01_G000926	1099	1	resistance protein		TIR domain	OG0026026	no_significant_change	1	10750	0.9117	10750
626	PA_chr01_G000929	1412	1	Auxin-induced protein		Auxin responsive protein	OG0001766	no_significant_change	1	44417	2.0298	2746	1.3208	11518	-1.3444	15204	1.2907	14949
627	PA_chr01_G000930	1427	1	Auxin-responsive family		Auxin responsive protein	OG0001766	no_significant_change	1	59631	0.9605	10284	0.9802	13771	0.9142	18094	0.9207	17482
628	PA_chr01_G000932	1077	2	Belongs to the tetraspanin (TM4SF) family		Tetraspanin family				53378	1.3108	7172	0.7295	15762	-1.2458	15894	-1.3492	14550
629	PA_chr01_G000933	3546	1	CorA-like Mg2+ transporter protein			OG0031755	no_significant_change		43137	0.7215	12562	-2.2738	7202	2.1974	9654	-1.4707	13719
630	PA_chr01_G000934	2149	1	E3 ubiquitin-protein ligase RF298			OG0001316	no_significant_change	9.48894e-09	73086	0.6802	12954	0.2212	19610	0.2709	20781	0.5152	19741
631	PA_chr01_G000935	2174	5	reductase		Aldo/keto reductase family	OG0000097	no_significant_change	1	12502	0.7278	12502
632	PA_chr01_G000936	54570	5	reductase		Aldo/keto reductase family	OG0000097	no_significant_change	1	9805	1.0122	9805
633	PA_chr01_G000937	2446	5	reductase		Aldo/keto reductase family	OG0000097	no_significant_change	1	11296	0.8545	11296
634	PA_chr01_G000938	549	1	oxidoreductase activity		Aldo/keto reductase family	OG0003340	no_significant_change	1	12061	0.7737	12061
635	PA_chr01_G000939	556	1	gag-polypeptide of LTR copia-type			OG0000072	no_significant_change		12061	0.7737	12061
636	PA_chr01_G000940	3259	5	reductase		Aldo/keto reductase family	OG0000097	no_significant_change	1	69785	1.0167	9760	0.3796	18584	-0.2253	20866	-0.3071	20575
637	PA_chr01_G000941	2718	1	Dirigent proteins impart stereoselectivity on the phenoxy radical-coupling reaction, yielding optically active lignans from two molecules of coniferyl alcohol in the biosynthesis of lignans, flavonolignans, and alkaloids and thus plays a central role in plant secondary metabolism		Dirigent-like protein	OG0043673	no_significant_change		13035	0.6713	13035
638	PA_chr01_G000942	853	2	aldo-keto reductase		Aldo/keto reductase family	OG0000097	no_significant_change	1	13035	0.6713	13035
639	PA_chr01_G000943	1177	2	oxidoreductase activity		Aldo/keto reductase family	OG0003340	no_significant_change	1	13035	0.6713	13035
640	PA_chr01_G000944	719	1	oxidoreductase activity		Aldo/keto reductase family	OG0003340	no_significant_change	1	55726	0.7936	11872	1.1529	12528	-1.0394	17324	-1.4302	14002
641	PA_chr01_G000945	1863	4	reductase		Aldo/keto reductase family	OG0000097	no_significant_change	1	55884	0.7936	11872	0.8363	14887	-1.7188	12579	-1.0595	16546
642	PA_chr01_G000946	2966	5	reductase		Aldo/keto reductase family	OG0000097	no_significant_change	1	73343	0.7586	12210	0.2766	19294	-0.2561	20815	0.1179	21024
643	PA_chr01_G000947	2722	2	Belongs to the bacterial ribosomal protein bL31 family						52483	0.7881	11926	0.2473	19472	0.0517	21085
644	PA_chr01_G000948	3764	5	reductase		Aldo/keto reductase family	OG0000097	no_significant_change	1	45696	0.8934	10923	0.7787	15357	-2.5018	7996	-1.8384	11420
645	PA_chr01_G000949	2547	2	Belongs to the bacterial ribosomal protein bL31 family		Ribosomal protein L31	OG0008764	no_significant_change		10911	0.8947	10911
646	PA_chr01_G000950	726	1	Auxin responsive protein		Auxin responsive protein	OG0000654	expanded	1	56105	1.1273	8754	1.7134	9476	1.0319	17376	-0.33	20499
647	PA_chr01_G000951	1108	1				OG0001299	no_significant_change	1	14641	0.4988	14641
648	PA_chr01_G000952	715	1	SAUR-like auxin-responsive protein family		Auxin responsive protein	OG0000654	expanded	1	14641	0.4988	14641
649	PA_chr01_G000953	503	1	auxin-responsive protein		Auxin responsive protein	OG0000654	expanded	1	13063	0.6683	13063
650	PA_chr01_G000954	605	1	Auxin responsive protein		Auxin responsive protein	OG0000654	expanded	1	60024	0.5814	13878	-0.4099	18343	1.4481	14473	1.5288	13330
651	PA_chr01_G000955	1243	1	SAUR-like auxin-responsive protein family		Auxin responsive protein	OG0000654	expanded	1	46893	0.7871	11936	-1.5914	10061	1.4279	14612	2.0354	10284
652	PA_chr01_G000956	508	1	SAUR-like auxin-responsive protein family		Auxin responsive protein	OG0000654	expanded	1	13058	0.6688	13058
653	PA_chr01_G000957	508	1	SAUR-like auxin-responsive protein family		Auxin responsive protein	OG0000654	expanded	1	13647	0.6061	13647
654	PA_chr01_G000958	1137	1	Auxin-induced protein		Auxin responsive protein	OG0000654	expanded	1	52027	1.0312	9634	0.4956	17669	1.6616	12957	1.7763	11767
655	PA_chr01_G000959	623	1	SAUR-like auxin-responsive protein family		Auxin responsive protein	OG0000654	expanded	1	15591	0.386	15591
656	PA_chr01_G000960	500	1				OG0021780	no_significant_change	1	15591	0.386	15591
657	PA_chr01_G000961	645	1	ribonuclease H protein			OG0031756	no_significant_change		14337	0.5321	14337
658	PA_chr01_G000962	699	1				OG0022470	no_significant_change	1	76168	0.5437	14232	0.1667	19877	0.0769	21062	-0.1362	20997
659	PA_chr01_G000963	1986	2				OG0026027	no_significant_change		65710	0.5437	14232	0.9537	13974	-0.6204	19641	0.86	17863
660	PA_chr01_G000964	858	1	Disease resistance protein		TIR domain	OG0010927	no_significant_change		14232	0.5437	14232
661	PA_chr01_G000965	733	1	TIR domain			OG0031757	no_significant_change		71973	0.5567	14113	0.6212	16655	-0.507	20088	-0.0394	21117
662	PA_chr01_G000966	2870	2	TMV resistance protein N-like		NB-ARC domain				63230	0.5567	14113	0.7294	15763	-1.3756	14984	-0.7783	18370
663	PA_chr01_G000967	542	1	SAUR-like auxin-responsive protein family		Auxin responsive protein	OG0000654	expanded	1	63346	0.9784	10119	0.93	14153	-0.7776	18879	0.4137	20195
664	PA_chr01_G000968	716	1	SAUR-like auxin-responsive protein family		Auxin responsive protein	OG0000654	expanded	1	55551	0.8138	11685	0.8647	14665	1.9335	11173	-0.8335	18028
665	PA_chr01_G000969	589	1	auxin-induced protein		Auxin responsive protein	OG0000654	expanded	1	61678	0.7808	11993	0.9693	13859	1.0586	17199	0.738	18627
666	PA_chr01_G000970	637	1	auxin-induced protein		Auxin responsive protein	OG0000654	expanded	1	63278	0.861	11235	0.4869	17740	-0.9618	17808	1.0664	16495
667	PA_chr01_G000971	545	1	Auxin-induced protein		Auxin responsive protein	OG0000654	expanded	1	63476	0.6764	12990	-1.3058	11605	0.9025	18157	-0.2512	20724
668	PA_chr01_G000972	626	1	Auxin-induced protein		Auxin responsive protein	OG0000654	expanded	1	73633	0.6764	12990	0.3014	19126	-0.4151	20390	0.0309	21127
669	PA_chr01_G000973	507	1	auxin-induced protein		Auxin responsive protein	OG0000654	expanded	1	12257	0.7535	12257
670	PA_chr01_G000974	570	1	auxin-induced protein		Auxin responsive protein	OG0014228	no_significant_change	1	12037	0.7762	12037
671	PA_chr01_G000975	497	1	auxin-induced protein		Auxin responsive protein	OG0014228	no_significant_change	1	15055	0.4516	15055
672	PA_chr01_G000976	493	1	auxin-induced protein		Auxin responsive protein	OG0014228	no_significant_change	1	14148	0.5528	14148
673	PA_chr01_G000984	519	1	phosphoribosylformylglycinamidine synthase		Auxin responsive protein	OG0014228	no_significant_change	1	10950	0.8907	10950
674	PA_chr01_G000985	513	1	phosphoribosylformylglycinamidine synthase		Auxin responsive protein	OG0014228	no_significant_change	1	14403	0.5251	14403
675	PA_chr01_G000986	496	1	Auxin responsive protein		Auxin responsive protein	OG0014228	no_significant_change	1	15207	0.4338	15207
676	PA_chr01_G000987	935	1				OG0013001	no_significant_change	1	10224	0.9669	10224
677	PA_chr01_G000988	612	1				OG0013001	no_significant_change	1	16957	0	16957
678	PA_chr01_G000989	837	1	Auxin responsive protein		Auxin responsive protein	OG0014228	no_significant_change	0.310472	54167	0.9995	9927	0.9362	14111	-1.5883	13457	-1.0407	16672
679	PA_chr01_G000993	554	1	auxin-induced protein		Auxin responsive protein	OG0014228	no_significant_change	1	61666	1.0162	9765	0.8024	15165	-0.6639	19445	0.9507	17291
680	PA_chr01_G000994	489	1	Auxin-induced protein		Auxin responsive protein	OG0014228	no_significant_change	1	61338	1.0598	9364	0.4572	17982	-1.1091	16859	-0.975	17133
681	PA_chr01_G000995	4003	4	TMV resistance protein N-like		TIR domain;NB-ARC domain;Leucine Rich Repeat	OG0000021	no_significant_change		16957	0	16957
682	PA_chr01_G000996	3897	4	TMV resistance protein N-like		TIR domain;NB-ARC domain;Leucine Rich Repeat	OG0000021	no_significant_change		16957	0	16957
683	PA_chr01_G000997	28627	5	TMV resistance protein N-like		Leucine rich repeat;BspA type Leucine rich repeat region (6 copies);TIR domain;NB-ARC domain;Leucine Rich Repeat	OG0000021	no_significant_change		15110	0.4453	15110
684	PA_chr01_G000998	6897	4	Toll - interleukin 1 - resistance		BspA type Leucine rich repeat region (6 copies);TIR domain;NB-ARC domain	OG0000021	no_significant_change		40726	0.5331	14327	-2.688	5740	-2.0651	10389	2.0374	10270
685	PA_chr01_G000999	989	2	Pathogen-related			OG0026028	no_significant_change		66659	1.0762	9215	0.3117	19063	0.6741	19398	0.6689	18983
686	PA_chr01_G001005	2080	4	receptor-like protein kinase		Protein tyrosine and serine/threonine kinase	OG0000008	no_significant_change		11510	0.8317	11510
687	PA_chr01_G001006	44321	5	receptor-like protein kinase		Protein tyrosine and serine/threonine kinase	OG0000008	no_significant_change		70236	0.8395	11436	0.2862	19228	-0.6359	19577	-0.461	19995
688	PA_chr01_G001008	3868	2	Belongs to the argonaute family	AGO7	N-terminal domain of argonaute;Argonaute linker 1 domain;Piwi domain;PAZ domain	OG0004103	no_significant_change	0.469651	56256	0.8652	11193	-1.0565	13209	-1.2803	15654	-1.109	16200
689	PA_chr01_G001009	3880	3	Belongs to the argonaute family	AGO7	N-terminal domain of argonaute;Argonaute linker 1 domain;Piwi domain;PAZ domain	OG0004103	no_significant_change	0.548985	50406	0.94	10476	-1.0182	13484	1.626	13193	1.5405	13253
690	PA_chr01_G001010	4888	4	Belongs to the argonaute family	AGO7	N-terminal domain of argonaute;Argonaute linker 1 domain;Piwi domain;PAZ domain	OG0004103	no_significant_change	0	38620	1.5674	5219	1.0937	12949	-2.2934	9124	-1.855	11328
691	PA_chr01_G001011	184637	3	ribosome-binding factor A		Ribosome-binding factor A	OG0009844	no_significant_change		24923	1.3765	6627	2.7559	5507	2.8297	6283	2.807	6506
692	PA_chr01_G001012	834	1							55083	1.1318	8716	0.4292	18205	1.4226	14653	-1.5024	13509
693	PA_chr01_G001013	117096	15	Auxin response factors (ARFs) are transcriptional factors that bind specifically to the DNA sequence 5'-TGTCTC-3' found in the auxin-responsive promoter elements (AuxREs)		Auxin response factor;B3 DNA binding domain;AUX/IAA family	OG0002482	no_significant_change	0.0434195	22672	1.3286	7025	-3.369	3829	-2.9079	5882	-2.9331	5936
694	PA_chr01_G001014	1087	1				OG0043655	no_significant_change		47054	1.0676	9294	1.2107	12167	-2.0682	10369	1.25	15224
695	PA_chr01_G001016	643	1				OG0043674	no_significant_change		70015	0.8191	11634	0.178	19828	-0.8621	18409	-0.4264	20144
696	PA_chr01_G001018	463469	21	Leucine rich repeat N-terminal domain		Protein kinase domain	OG0009885	no_significant_change	1	12652	2.4893	1562	-3.9187	2663	-3.0968	5003	3.5846	3424
697	PA_chr01_G001019	585	1	GPI anchor metabolic process	PGAP3	Reverse transcriptase-like	OG0012169	no_significant_change	1	10934	0.8923	10934
698	PA_chr01_G001021	109776	2	Auxin response factors (ARFs) are transcriptional factors that bind specifically to the DNA sequence 5'-TGTCTC-3' found in the auxin-responsive promoter elements (AuxREs)		AUX/IAA family	OG0011389	no_significant_change		60324	1.8327	3583	0.4528	18018	-0.6778	19378	0.599	19345
699	PA_chr01_G001022	766	1				OG0003663	no_significant_change	1	10975	0.8882	10975
700	PA_chr01_G001023	617080	20	Leucine-rich repeat receptor-like protein kinase		Protein kinase domain	OG0009885	no_significant_change	1	8834	3.0524	789	4.0546	2431	3.5101	3255	3.9577	2359
701	PA_chr01_G001024	841	1				OG0002979	no_significant_change	1	14779	0.4828	14779
702	PA_chr01_G001027	513715	20	Leucine-rich repeat receptor-like protein kinase		Protein kinase domain	OG0009885	no_significant_change	0.82833	21015	1.0663	9306	-3.2898	4007	-3.2661	4237	3.5709	3465
703	PA_chr01_G001028	611	1							34706	1.682	4462	0.7499	15593	-2.361	8753	-2.9413	5898
704	PA_chr01_G001029	1700	1	E3 ubiquitin-protein ligase that mediates ubiquitination and subsequent proteasomal degradation of target proteins. E3 ubiquitin ligases accept ubiquitin from an E2 ubiquitin- conjugating enzyme in the form of a thioester and then directly transfers the ubiquitin to targeted substrates		Seven in absentia protein family	OG0022471	no_significant_change	1	1845	2.3421	1845
705	PA_chr01_G001030	1171	1				OG0031759	no_significant_change		67699	0.7275	12505	-0.3579	18751	-0.8053	18735	-0.886	17708
706	PA_chr01_G001031	22689	14	Belongs to the beta-ketoacyl-ACP synthases family		Beta-ketoacyl synthase, C-terminal domain;Beta-ketoacyl synthase, N-terminal domain	OG0003686	no_significant_change	1	42649	1.6021	4982	1.5654	10182	1.3461	15192	-1.6908	12293
707	PA_chr01_G001032	14635	1				OG0003294	no_significant_change	1	41176	2.7247	1174	-0.9818	13758	-2.163	9832	-1.0779	16412
708	PA_chr01_G001033	150000	15	FAD synthase-like		Phosphoadenosine phosphosulfate reductase family;Probable molybdopterin binding domain	OG0006508	no_significant_change	0.0357137	9563	2.1115	2431	-5.8608	654	-4.7005	763	2.9821	5715
709	PA_chr01_G001036	201175	4	methionine sulfoxide reductase	MSRA5	Peptide methionine sulfoxide reductase	OG0009342	no_significant_change		23567	1.4499	6046	-2.104	7843	-3.7481	2466	-2.6548	7212
710	PA_chr01_G001037	19533	3	Transcriptional regulator STERILE			OG0026029	no_significant_change		34235	1.4098	6374	-1.1587	12498	-3.113	4926	-2.0087	10437
711	PA_chr01_G001038	70125	2							14282	0.8589	11256	-4.3291	1987	6.794	24	4.7589	1015
712	PA_chr01_G001039	48419	3	TMV resistance protein N-like		TIR domain	OG0022472	no_significant_change		21315	1.428	6221	2.9504	4928	-3.4093	3640	2.8023	6526
713	PA_chr01_G001040	474	1	Legume lectin domain			OG0014015	no_significant_change		12057	0.7741	12057
714	PA_chr01_G001041	2702	3	TMV resistance protein		TIR domain	OG0026030	no_significant_change	1	14652	0.4975	14652
715	PA_chr01_G001048	10669	3	TIR domain		TIR domain	OG0026030	no_significant_change	0.206883	50419	1.0966	9026	0.9366	14108	-1.3854	14916	1.6779	12369
716	PA_chr01_G001051	2099	3			Leucine rich repeat				55996	1.0242	9697	1.1471	12568	-1.3431	15215	-0.7559	18516
717	PA_chr01_G001052	7316	2	Peptidyl-prolyl cis-trans isomerase		PPIC-type PPIASE domain	OG0009646	no_significant_change		52584	1.9872	2909	0.4919	17698	1.2152	16111	-1.1551	15866
718	PA_chr01_G001053	4971	4	TMV resistance protein N-like		TIR domain;NB-ARC domain	OG0000157	no_significant_change		13666	1.2679	7528	-4.7424	1471	-4.8538	615	-3.4001	4052
719	PA_chr01_G001054	259620	8	exosome complex		KH domain	OG0006186	no_significant_change		13533	2.1702	2283	2.979	4845	-3.6612	2747	3.5089	3658
720	PA_chr01_G001055	600	1							39765	1.226	7886	1.2052	12194	-1.9996	10777	-2.3041	8908
721	PA_chr01_G001058	60985	3	At5g49945-like		Protein of unknown function (DUF1682)	OG0005922	no_significant_change		28560	2.1138	2425	-1.1776	12372	-2.8473	6191	2.5743	7572
722	PA_chr01_G001059	575	1				OG0022473	no_significant_change	1	51899	1.8332	3580	-0.1102	20096	-1.829	11838	-1.0818	16385
723	PA_chr01_G001060	74893	8	domain in TBC and LysM domain containing proteins		TLD	OG0006281	no_significant_change	1	32591	1.3777	6617	1.5576	10226	2.7058	6933	-2.3217	8815
724	PA_chr01_G001061	2682	5	Belongs to the ubiquitin-conjugating enzyme family	UBC23	Ubiquitin-conjugating enzyme	OG0001345	no_significant_change	8.33023e-12	12893	0.6866	12893
725	PA_chr01_G001062	3235	3	Belongs to the ubiquitin-activating E1 family	UBA1	Ubiquitin-activating enzyme active site;ThiF family	OG0031760	no_significant_change		16957	0	16957
726	PA_chr01_G001064	1899	2	Hydroxyproline-rich glycoprotein family protein		Raffinose synthase or seed imbibition protein Sip1	OG0012386	no_significant_change	1	16957	0	16957
727	PA_chr01_G001065	601	1	endonuclease activity		PPR repeat family	OG0013285	no_significant_change	1	16957	0	16957
728	PA_chr01_G001066	854	1	Raffinose synthase or seed imbibition protein Sip1	STS	Raffinose synthase or seed imbibition protein Sip1	OG0012386	no_significant_change	1	16957	0	16957
729	PA_chr01_G001067	719	1	endonuclease activity		PPR repeat family	OG0013285	no_significant_change	1	16957	0	16957
730	PA_chr01_G001068	663	2	Universal stress protein		Universal stress protein family	OG0000971	no_significant_change	1	16957	0	16957
731	PA_chr01_G001069	1846	1	Galactose oxidase-like		Domain of unknown function (DUF1929);Glyoxal oxidase N-terminus	OG0000282	expanded	1	55185	1.0264	9677	0.4004	18419	-1.666	12925	-1.4082	14164
732	PA_chr01_G001070	4039	5	Cell division cycle 20.2, cofactor of APC complex-like		Anaphase-promoting complex subunit 4 WD40 domain;WD domain, G-beta repeat	OG0000442	no_significant_change	1	9523	1.043	9523
733	PA_chr01_G001071	5446	5	Cell division cycle 20.2, cofactor of APC complex-like		Anaphase-promoting complex subunit 4 WD40 domain;WD domain, G-beta repeat	OG0000442	no_significant_change	1	6622	1.377	6622
734	PA_chr01_G001072	5334	6	Anaphase-promoting complex subunit 4 WD40 domain		Anaphase-promoting complex subunit 4 WD40 domain;WD domain, G-beta repeat				66245	1.2916	7331	0.2505	19451	-0.6115	19677	-0.5064	19786
735	PA_chr01_G001073	3552	5				OG0010447	no_significant_change	1	47606	1.1975	8128	1.1139	12802	1.3734	15000	1.7932	11676
736	PA_chr01_G001074	3500	3				OG0018483	no_significant_change	0.217213	35696	0.9932	9984	2.9733	4861	1.7304	12502	2.4197	8349
737	PA_chr01_G001076	3531	5				OG0018483	no_significant_change	1	47360	1.3591	6770	1.4014	11053	-1.3091	15454	1.419	14083
738	PA_chr01_G001077	3786	1				OG0007859	no_significant_change	1	54834	1.4073	6392	0.6832	16148	1.1104	16848	-1.2169	15446
739	PA_chr01_G001078	57652	10	Performs the first committed step in the biosynthesis of isoprene-containing compounds such as sterols and terpenoids		Mevalonate 5-diphosphate decarboxylase C-terminal domain;GHMP kinases N terminal domain	OG0005282	no_significant_change	1	21238	2.1662	2293	2.9172	5038	2.5003	8002	2.9393	5905
740	PA_chr01_G001079	625	1				OG0013768	no_significant_change	1	49930	1.5309	5468	-0.7793	15352	1.974	10929	0.8097	18181
741	PA_chr01_G001080	454	1							60439	1.5309	5468	0.2536	19436	-1.0538	17230	-0.7886	18305
742	PA_chr01_G001081	4065	1	Piriformospora indica-insensitive protein		Leucine rich repeat	OG0003173	no_significant_change	1	42378	1.0988	9007	0.8422	14838	-2.7441	6736	-1.7719	11797
743	PA_chr01_G001082	108523	8	SANTA (SANT Associated)		SANTA (SANT Associated)	OG0003422	no_significant_change	1	21818	0.9785	10118	3.2412	4125	3.2709	4212	3.6003	3363
744	PA_chr01_G001084	2994	1	TMV resistance protein N-like		NB-ARC domain				12106	0.7692	12106
745	PA_chr01_G001085	46386	15	histone acetyl-transferase		Histone acetylation protein;TAZ zinc finger;PHD-finger;Zinc finger, ZZ type	OG0001788	no_significant_change	1	2599	2.6098	1343	-6.2165	497	4.9262	560	6.0041	199
746	PA_chr01_G001086	1160	1				OG0004281	no_significant_change	1	355	3.8809	355
747	PA_chr01_G001087	3764	1							31176	2.2882	1979	-1.9349	8543	2.4273	8392	1.6962	12262
748	PA_chr01_G001088	651	1							41048	3.4825	496	-0.951	13996	-2.3245	8966	0.9044	17590
749	PA_chr01_G001093	2210	1	DNA-dependent RNA polymerase catalyzes the transcription of DNA into RNA using the four ribonucleoside triphosphates as substrates		DNA-dependent RNA polymerase	OG0009864	no_significant_change	0.5	551	3.3917	551
750	PA_chr01_G001094	728	1							4011	1.757	4011
751	PA_chr01_G001095	6316	1				OG0043675	no_significant_change		2431	2.1115	2431
752	PA_chr01_G001097	859	1							121	5.0323	121
753	PA_chr01_G001099	1235	1	ATP synthase	atp1		OG0025370	no_significant_change		1123	2.758	1123
754	PA_chr01_G001100	4020	1							834	3.0162	834
755	PA_chr01_G001101	1501	2							53837	1.1504	8551	0.6531	16390	-1.525	13913	-1.2859	14983
756	PA_chr01_G001102	7172	4	Belongs to the NPH3 family		NPH3 family;BTB/POZ domain	OG0001140	no_significant_change	1	34867	4.0343	311	-1.3438	11398	1.9093	11329	1.7656	11829
757	PA_chr01_G001107	88838	6	IQ-domain	IQD29	Protein of unknown function (DUF4005);IQ calmodulin-binding motif	OG0005350	no_significant_change		19470	3.0393	807	-2.3227	7022	2.5252	7874	-3.4776	3767
758	PA_chr01_G001108	643	1	4-hydroxy-3-methylbut-2-en-1-yl diphosphate synthase			OG0031762	no_significant_change		70745	0.9457	10421	0.195	19746	0.3145	20677	-0.481	19901
759	PA_chr01_G001109	483	1							53942	1.1832	8258	0.2978	19150	-2.1251	10042	-1.0667	16492
760	PA_chr01_G001110	78112	4	Regulator of nonsense transcripts 1 homolog			OG0031762	no_significant_change		26701	1.6324	4786	-2.5735	6103	2.1324	10001	-2.9595	5811
761	PA_chr01_G001111	620	1				OG0004766	no_significant_change	0.00274723	62710	0.9181	10687	-0.2292	19574	-1.0818	17041	-1.2224	15408
762	PA_chr01_G001113	111080	16	Protein RCC2 homolog		Regulator of chromosome condensation (RCC1) repeat	OG0007901	no_significant_change		20755	1.5914	5064	3.0387	4674	3.0234	5339	2.992	5678
763	PA_chr01_G001114	156935	11	tRNA-dihydrouridine(47) synthase NAD(P)( )		Dihydrouridine synthase (Dus)	OG0004564	no_significant_change		18289	2.061	2624	-2.8165	5336	-3.0285	5320	-3.1427	5009
764	PA_chr01_G001116	1659	1							19323	3.9905	326	-1.281	11746	3.2944	4099	3.668	3152
765	PA_chr01_G001117	10555	1				OG0000480	no_significant_change	1	69943	0.992	9996	0.2695	19338	-0.5993	19729	-0.1916	20880
766	PA_chr01_G001118	430	1				OG0011726	no_significant_change	1.75714e-05	9996	0.992	9996
767	PA_chr01_G001119	67195	2	Protein BASIC PENTACYSTEINE6-like		GAGA binding protein-like family	OG0000966	no_significant_change	0.693455	29196	2.0719	2584	-1.4772	10654	2.169	9803	-2.885	6155
768	PA_chr01_G001122	4673	4	40s ribosomal protein		Ribosomal protein S19e	OG0003079	no_significant_change	1	49206	1.2282	7867	-1.0027	13600	1.2406	15928	1.7691	11811
769	PA_chr01_G001123	75813	5	Speckle-type POZ protein-like protein		BTB/POZ domain	OG0000663	no_significant_change	1	36281	1.4496	6049	-1.5471	10284	-2.1716	9794	-2.0575	10154
770	PA_chr01_G001127	1717	1				OG0022474	no_significant_change		57374	0.7375	12408	-1.3758	11202	-1.1326	16700	-0.9845	17064
771	PA_chr01_G001128	3439	3	WUSCHEL-related homeobox		Homeodomain	OG0001965	no_significant_change	1	36613	0.9373	10502	-1.9084	8655	-1.9122	11310	2.887	6146
772	PA_chr01_G001129	2699	4	WUSCHEL-related homeobox		Homeodomain	OG0001965	no_significant_change	1	4624	1.6558	4624
773	PA_chr01_G001130	2825	3	WUSCHEL-related homeobox		Homeodomain	OG0001965	no_significant_change	1	7961	1.2164	7961
774	PA_chr01_G001131	3131	3	WUSCHEL-related homeobox		Homeodomain	OG0001965	no_significant_change	1	12686	0.7082	12686
775	PA_chr01_G001132	2762	3	WUSCHEL-related homeobox		Homeodomain	OG0001965	no_significant_change	1	16957	0	16957
776	PA_chr01_G001134	2961	2	WUSCHEL-related homeobox			OG0001965	no_significant_change	1	9546	1.0406	9546
777	PA_chr01_G001135	2413	4	WUSCHEL-related homeobox		Homeodomain	OG0001965	no_significant_change	1	8435	1.1636	8435
778	PA_chr01_G001136	2547	4	WUSCHEL-related homeobox		Homeodomain	OG0001965	no_significant_change	1	10992	0.8863	10992
779	PA_chr01_G001137	2687	3	WUSCHEL-related homeobox		Homeodomain	OG0001965	no_significant_change	1	11810	0.8002	11810
780	PA_chr01_G001138	1027	1	Belongs to the UDP-glycosyltransferase family			OG0031763	no_significant_change		10882	0.8979	10882
781	PA_chr01_G001139	2483	3	WUSCHEL-related homeobox		Homeodomain	OG0001965	no_significant_change	1	11721	0.81	11721
782	PA_chr01_G001140	1591	1	Belongs to the UDP-glycosyltransferase family		UDP-glucoronosyl and UDP-glucosyl transferase	OG0012699	no_significant_change		71644	0.9296	10574	0.2816	19259	0.1966	20912	-0.1828	20899
783	PA_chr01_G001141	1600	1	Belongs to the UDP-glycosyltransferase family		UDP-glucoronosyl and UDP-glucosyl transferase	OG0012699	no_significant_change		64406	0.7853	11952	0.4877	17732	-1.298	15540	-0.6321	19182
784	PA_chr01_G001142	2910	3	Belongs to the TUB family		F-box domain	OG0011298	no_significant_change	1	14742	0.4871	14742
785	PA_chr01_G001143	1693	1	Belongs to the UDP-glycosyltransferase family	UGT73B5	UDP-glucoronosyl and UDP-glucosyl transferase	OG0012699	no_significant_change		62411	1.1868	8227	0.2489	19462	1.3152	15408	0.6045	19314
786	PA_chr01_G001144	1891	1	Belongs to the UDP-glycosyltransferase family	UGT73B5	UDP-glucoronosyl and UDP-glucosyl transferase	OG0012699	no_significant_change		47929	1.2438	7732	-1.126	12717	1.1431	16624	1.9357	10856
787	PA_chr01_G001145	1578	1	Belongs to the UDP-glycosyltransferase family		UDP-glucoronosyl and UDP-glucosyl transferase	OG0012699	no_significant_change		16957	0	16957
788	PA_chr01_G001146	46097	1				OG0029227	no_significant_change		36197	0.9554	10331	-2.8173	5331	-2.1347	9986	1.9893	10549
789	PA_chr01_G001147	1675	1	Belongs to the UDP-glycosyltransferase family		UDP-glucoronosyl and UDP-glucosyl transferase	OG0043676	no_significant_change		57136	0.8324	11504	0.7733	15397	1.3811	14944	1.2401	15291
790	PA_chr01_G001150	1748	1	Belongs to the UDP-glycosyltransferase family		UDP-glucoronosyl and UDP-glucosyl transferase	OG0043676	no_significant_change		51927	1.1828	8260	0.4734	17851	-1.579	13525	-1.691	12291
791	PA_chr01_G001151	2061	1	Belongs to the UDP-glycosyltransferase family		UDP-glucoronosyl and UDP-glucosyl transferase	OG0012699	no_significant_change		59322	0.7726	12072	0.4154	18305	-0.891	18230	-1.9587	10715
792	PA_chr01_G001152	1517	1	Belongs to the UDP-glycosyltransferase family	DOGT1	UDP-glucoronosyl and UDP-glucosyl transferase	OG0012699	no_significant_change		63033	0.9243	10626	0.3146	19043	1.1857	16324	0.9883	17040
793	PA_chr01_G001153	1647	1	Belongs to the UDP-glycosyltransferase family	UGT73B5	UDP-glucoronosyl and UDP-glucosyl transferase	OG0012699	no_significant_change		13507	0.6212	13507
794	PA_chr01_G001154	2321	1				OG0015316	no_significant_change	0.305788	52806	0.9945	9972	0.8537	14745	-2.1023	10181	-0.8528	17908
795	PA_chr01_G001155	5030	4	transcription factor		bZIP transcription factor	OG0003324	no_significant_change	1	42310	1.357	6789	1.2915	11687	1.898	11407	1.6686	12427
796	PA_chr01_G001156	6050	3				OG0009780	no_significant_change		41501	0.6602	13140	1.145	12578	-1.9868	10855	3.1621	4928
797	PA_chr01_G001159	4677	3	TMV resistance protein N-like			OG0001375	no_significant_change	0.000104894	52574	1.0739	9238	-0.7702	15423	1.5966	13396	1.3541	14517
798	PA_chr01_G001160	619	1							16957	0	16957
799	PA_chr01_G001163	1869	2	Belongs to the multi antimicrobial extrusion (MATE) (TC 2.A.66.1) family		MatE	OG0012086	no_significant_change		9049	1.0942	9049
800	PA_chr01_G001165	3987	3	TMV resistance protein N-like		NB-ARC domain	OG0031765	no_significant_change		9361	1.0601	9361
801	PA_chr01_G001166	675	1	TMV resistance protein N-like		TIR domain	OG0026026	no_significant_change	1	9361	1.0601	9361
802	PA_chr01_G001167	3065	3				OG0031765	no_significant_change		65882	1.0112	9815	0.3673	18677	-0.8966	18191	-0.629	19199
803	PA_chr01_G001168	593	1				OG0014805	no_significant_change	0.271108	13617	0.6094	13617
804	PA_chr01_G001169	743	1			Cotton fibre expressed protein	OG0007161	no_significant_change	1	63190	0.9781	10122	0.456	17994	1.1708	16428	-0.735	18646
805	PA_chr01_G001170	728	1			Cotton fibre expressed protein	OG0007161	no_significant_change	1	8596	1.1454	8596
806	PA_chr01_G001171	672	1			Cotton fibre expressed protein	OG0007161	no_significant_change	1	10561	0.9311	10561
807	PA_chr01_G001172	688	1			Cotton fibre expressed protein	OG0007161	no_significant_change	1	11760	0.8058	11760
808	PA_chr01_G001173	860	2			Cotton fibre expressed protein	OG0007161	no_significant_change	1	64031	1.5259	5500	-0.2942	19172	-0.6517	19505	-0.4922	19854
809	PA_chr01_G001174	707	1			Cotton fibre expressed protein	OG0007161	no_significant_change	1	42881	1.8205	3647	0.489	17724	2.6925	7005	1.3559	14505
810	PA_chr01_G001175	140272	2			Cotton fibre expressed protein	OG0007161	no_significant_change	1	18697	1.3456	6881	3.9668	2582	-2.7108	6911	3.9725	2323
811	PA_chr01_G001176	12695	1			Cotton fibre expressed protein	OG0007161	no_significant_change	1	48892	0.8431	11402	1.1578	12502	1.859	11648	-1.5272	13340
812	PA_chr01_G001177	2171	6	Cinnamoyl-CoA reductase	CCR2	NAD dependent epimerase/dehydratase family	OG0000330	no_significant_change	1	12119	0.7679	12119
813	PA_chr01_G001178	759	1			Cotton fibre expressed protein	OG0007161	no_significant_change	1	62869	1.0117	9810	0.8665	14651	-0.7587	18979	-0.5818	19429
814	PA_chr01_G001179	1047	1	Subtilisin-like protease			OG0011326	no_significant_change	5.16348e-08	61497	1.0117	9810	-0.4682	17896	-1.0179	17469	-1.0912	16322
815	PA_chr01_G001180	1096	1				OG0031766	no_significant_change		52919	1.0117	9810	1.1808	12347	1.2721	15705	1.2737	15057
816	PA_chr01_G001181	488996	3	TMV resistance protein N-like		TIR domain;NB-ARC domain	OG0002074	no_significant_change	1	21773	0.9886	10028	3.4943	3528	-2.8412	6222	-4.1176	1995
817	PA_chr01_G001182	1714	1			Leucine Rich Repeat				42690	0.6689	13057	-1.9816	8341	-1.9884	10843	-2.0067	10449
818	PA_chr01_G001183	1744	1	Phospholipase A1-Igamma1		Lipase (class 3)	OG0010363	no_significant_change	0.68328	63788	0.8709	11139	-0.263	19380	-1.5674	13612	0.5331	19657
819	PA_chr01_G001184	1073	1	Phospholipase A1-Igamma1		Lipase (class 3)	OG0000332	no_significant_change	1	2455	2.105	2455
820	PA_chr01_G001185	1804	1	phospholipase		Lipase (class 3)	OG0000332	no_significant_change	1	16957	0	16957
821	PA_chr01_G001186	1664	1	phospholipase		Lipase (class 3)	OG0000332	no_significant_change	1	16957	0	16957
822	PA_chr01_G001187	1787	1	phospholipase		Lipase (class 3)	OG0000332	no_significant_change	1	16957	0	16957
823	PA_chr01_G001188	1746	1	phospholipase		Lipase (class 3)	OG0000332	no_significant_change	1	15827	0.3567	15827
824	PA_chr01_G001189	1701	1	phospholipase		Lipase (class 3)	OG0000332	no_significant_change	1	16957	0	16957
825	PA_chr01_G001190	1701	1	phospholipase		Lipase (class 3)	OG0000332	no_significant_change	1	10098	0.9805	10098
826	PA_chr01_G001192	1391	2	lob domain-containing protein		Lateral organ boundaries (LOB) domain	OG0000027	no_significant_change	1	56295	1.3047	7225	-0.8104	15099	1.0017	17567	-1.0794	16404
827	PA_chr01_G001193	48176	3	LOB domain-containing protein		Lateral organ boundaries (LOB) domain	OG0000027	no_significant_change	1	31133	0.685	12908	-2.7014	5691	-2.6167	7391	3.1148	5143
828	PA_chr01_G001194	1118	2	LOB domain-containing protein		Lateral organ boundaries (LOB) domain	OG0000027	no_significant_change	1	14835	0.4765	14835
829	PA_chr01_G001195	791	2	LOB domain-containing protein		Lateral organ boundaries (LOB) domain	OG0000027	no_significant_change	1	14062	0.5619	14062
830	PA_chr01_G001196	792	2	lob domain-containing protein		Lateral organ boundaries (LOB) domain	OG0000027	no_significant_change	1	13345	0.6384	13345
831	PA_chr01_G001197	853	1			Cotton fibre expressed protein	OG0007161	no_significant_change	1	57237	1.7337	4137	-0.4289	18208	0.9854	17664	-0.9609	17228
832	PA_chr01_G001200	717	1			Cotton fibre expressed protein	OG0007161	no_significant_change	1	55613	1.1666	8408	0.2697	19337	-2.3923	8586	0.6113	19282
833	PA_chr01_G001201	7441	3	TMV resistance protein N-like		Leucine rich repeat	OG0014803	no_significant_change	6.65646e-06	27081	0.8919	10938	2.9487	4932	-2.433	8355	-3.7697	2856
834	PA_chr01_G001202	591	1			Cotton fibre expressed protein	OG0007161	no_significant_change	1	13781	0.592	13781
835	PA_chr01_G001203	764	1			Cotton fibre expressed protein	OG0007161	no_significant_change	1	15523	0.3945	15523
836	PA_chr01_G001204	701	1				OG0043677	no_significant_change		40453	0.7157	12618	2.7076	5667	-1.9475	11085	-1.8953	11083
837	PA_chr01_G001205	2950	1	NADH dehydrogenase (quinone) activity			OG0009385	no_significant_change	0.393839	29494	1.0601	9361	0.0956	20133
838	PA_chr01_G001207	1626	1	cysteine-rich repeat secretory protein		Salt stress response/antifungal	OG0000209	no_significant_change	0.0104138	58339	0.767	12128	-0.6174	16687	-1.4583	14403	1.2647	15121
839	PA_chr01_G001208	2117	3	G-type lectin S-receptor-like serine threonine-protein kinase		Protein tyrosine and serine/threonine kinase	OG0017123	no_significant_change	0.0708571	61731	0.767	12128	0.7299	15759	-0.8514	18474	1.2285	15370
840	PA_chr01_G001210	4301	6	Salt stress response/antifungal		Salt stress response/antifungal;Protein kinase domain	OG0000014	expanded		63697	0.6874	12885	0.9794	13778	-0.9523	17862	0.6338	19172
841	PA_chr01_G001211	4088	6	Cysteine-rich receptor-like protein kinase		Salt stress response/antifungal;Protein kinase domain	OG0000014	expanded		67828	0.763	12167	-0.3389	18876	0.3547	20563	-1.1059	16222
842	PA_chr01_G001212	1703	3	Belongs to the 'GDSL' lipolytic enzyme family		GDSL-like Lipase/Acylhydrolase				13915	0.5776	13915
843	PA_chr01_G001213	5019	4	RESISTANCE protein		Leucine rich repeat;TIR domain;NB-ARC domain;Leucine Rich Repeat	OG0001375	no_significant_change	1	48980	0.9295	10575	-0.8214	15010	1.71	12635	-1.9513	10760
844	PA_chr01_G001214	4396	1	RNase H		Reverse transcriptase-like	OG0004544	no_significant_change	1	13056	0.669	13056
845	PA_chr01_G001215	1285	1	ATP-dependent DNA helicase		PIF1-like helicase	OG0002582	no_significant_change	1	13056	0.669	13056
846	PA_chr01_G001216	3333	1	Belongs to the disease resistance NB-LRR family		Leucine rich repeat;NB-ARC domain	OG0011728	no_significant_change	0.0847113	14653	0.4974	14653
847	PA_chr01_G001217	727	1							13649	0.6059	13649
848	PA_chr01_G001218	2202	4	TMV resistance protein N-like		TIR domain	OG0014230	no_significant_change	0.0078364	16957	0	16957
849	PA_chr01_G001219	2234	4	TMV resistance protein N-like		TIR domain	OG0014230	no_significant_change	0.0178847	13202	0.6535	13202
850	PA_chr01_G001221	2326	4	resistance protein		TIR domain	OG0014230	no_significant_change	2.15161e-13	13873	0.5819	13873
851	PA_chr01_G001222	2025	3	TMV resistance protein N-like		TIR domain	OG0014230	no_significant_change	0.550291	14097	0.5583	14097
852	PA_chr01_G001223	2204	3	TMV resistance protein N-like		TIR domain	OG0020222	no_significant_change	1.11056e-05	16957	0	16957
853	PA_chr01_G001224	107582	2	RESISTANCE protein		TIR domain	OG0020222	no_significant_change	1	40871	1.6515	4649	-2.0513	8049	1.2588	15798	1.6769	12375
854	PA_chr01_G001225	803	1				OG0026031	no_significant_change	1	11500	0.8329	11500
855	PA_chr01_G001226	1453	2	TMV resistance protein N-like		TIR domain	OG0020222	no_significant_change	1	11524	0.8303	11524
856	PA_chr01_G001228	26668	3				OG0010130	no_significant_change	1	15498	0.3978	15498
857	PA_chr01_G001229	985	1				OG0043678	no_significant_change		9505	1.0449	9505
858	PA_chr01_G001231	1170	1				OG0022475	no_significant_change	1	66255	0.8449	11387	-0.309	19080	-0.9854	17664	0.8192	18124
859	PA_chr01_G001232	3823	1	Core-2/I-Branching enzyme		Core-2/I-Branching enzyme				56339	0.9016	10847	0.5447	17287	-1.2622	15778	-1.6686	12427
860	PA_chr01_G001233	1853	2	TMV resistance protein N-like		TIR domain	OG0020222	no_significant_change	1	11965	0.7839	11965
861	PA_chr01_G001234	912	1				OG0026031	no_significant_change	1	11965	0.7839	11965
862	PA_chr01_G001235	936	1				OG0043678	no_significant_change		11965	0.7839	11965
863	PA_chr01_G001236	136570	1				OG0026031	no_significant_change	1	26126	1.0991	9006	2.7797	5440	-2.776	6559	-3.1195	5121
864	PA_chr01_G001237	1050	1							68541	0.7258	12521	0.7131	15901	0.5366	19978	0.4272	20141
865	PA_chr01_G001238	4888	2	RESISTANCE protein		TIR domain	OG0020222	no_significant_change	1.56875e-13	72289	0.7871	11936	-0.2722	19318	0.0647	21077	-0.4688	19958
866	PA_chr01_G001239	1538	2	RESISTANCE protein		TIR domain	OG0020222	no_significant_change	1	13143	0.6598	13143
867	PA_chr01_G001240	932	1				OG0026031	no_significant_change	1	13143	0.6598	13143
868	PA_chr01_G001241	2333	1	methionine	MGL	Cys/Met metabolism PLP-dependent enzyme	OG0005447	no_significant_change	1	40077	1.3977	6470	-1.3004	11634	-1.8658	11613	-2.0209	10360
869	PA_chr01_G001242	2809	1	methionine	MGL	Cys/Met metabolism PLP-dependent enzyme	OG0005447	no_significant_change	1	35244	2.054	2651	-0.6134	16711	-2.9124	5856	-2.0836	10026
870	PA_chr01_G001243	112289	4	Inorganic H+ pyrophosphatase	AVP1	Inorganic H+ pyrophosphatase	OG0010723	no_significant_change		17620	1.7319	4148	2.8338	5277	-3.9425	1955	-2.8657	6240
871	PA_chr01_G001245	19773	2							29643	2.2313	2115	-1.8641	8838	-2.4199	8438	-2.0412	10252
872	PA_chr01_G001246	688	1							45671	1.5694	5206	-1.1057	12863	-1.167	16454	-1.8848	11148
873	PA_chr01_G001247	3886	2	Cytochrome p450		Cytochrome P450	OG0000305	no_significant_change	1	29061	3.781	380	-2.9409	4960	1.9179	11277	1.6654	12444
874	PA_chr01_G001271	3241	3	Nucleotide-diphospho-sugar transferase		Nucleotide-diphospho-sugar transferase	OG0000234	no_significant_change	1	49569	1.3235	7070	0.784	15309	1.6212	13231	1.4358	13959
875	PA_chr01_G001272	2549	1	expressed protein		Protein BYPASS1-related	OG0003262	no_significant_change	1	47015	0.8848	11007	-0.8674	14644	-1.9567	11027	-2.0253	10337
876	PA_chr01_G001275	5618	3	Belongs to the GroES chaperonin family		Chaperonin 10 Kd subunit	OG0003020	no_significant_change	1	51365	1.4076	6390	-0.5283	17412	1.6597	12972	1.3428	14591
877	PA_chr01_G001276	8438	5	ubiquitin-60S ribosomal protein		Ribosomal L40e family;Ubiquitin family	OG0000078	no_significant_change	1	23902	1.4485	6059	3.1625	4323	2.5243	7879	3.0017	5641
878	PA_chr01_G001281	1574	1				OG0002048	no_significant_change	1	45435	1.7378	4117	0.9821	13756	-1.7382	12452	-1.266	15110
879	PA_chr01_G001282	958	1				OG0002048	no_significant_change	0.275033	51241	1.4049	6410	0.8736	14595	-1.0518	17243	-1.5824	12993
880	PA_chr01_G001283	1076	1				OG0002048	no_significant_change	1	51716	2.7584	1121	0.6336	16550	1.2083	16162	0.8567	17883
881	PA_chr01_G001284	1669	1				OG0002048	no_significant_change	1	47007	1.0763	9214	0.7864	15292	2.1559	9871	-1.6368	12630
882	PA_chr01_G001285	121366	5	Alpha/beta hydrolase family		Alpha/beta hydrolase family	OG0008263	no_significant_change		12684	2.1717	2278	4.796	1406	-3.3352	3932	3.1306	5068
883	PA_chr01_G001286	4853	4	TMV resistance protein N-like		TIR domain;NB-ARC domain	OG0001375	no_significant_change	0.00174898	33386	0.9497	10383	1.315	11556	-3.0631	5154	2.8531	6293
884	PA_chr01_G001287	3928	4	TMV resistance protein N-like		TIR domain;NB-ARC domain	OG0013770	no_significant_change	1	16957	0	16957
885	PA_chr01_G001288	841	1	Toll - interleukin 1 - resistance		TIR domain	OG0043679	no_significant_change		16957	0	16957
886	PA_chr01_G001289	2472	2	isoform X1						16957	0	16957
887	PA_chr01_G001290	1212	1	polyadenylate-binding protein		RNA recognition motif. (a.k.a. RRM, RBD, or RNP domain)				60933	0.572	13965	0.3199	19009	-1.5227	13927	-1.4265	14032
888	PA_chr01_G001291	4032	4	TMV resistance protein N-like		TIR domain;NB-ARC domain	OG0013770	no_significant_change	1	14844	0.4756	14844
889	PA_chr01_G001292	772	1	disease resistance protein			OG0013770	no_significant_change	1	15113	0.4447	15113
890	PA_chr01_G001293	3912	4	TMV resistance protein N-like		TIR domain;NB-ARC domain	OG0013770	no_significant_change	1	14714	0.49	14714
891	PA_chr01_G001294	1076	1	Belongs to the peptidase S10 family		Serine carboxypeptidase	OG0002241	no_significant_change	0.000880858	12316	0.7472	12316
892	PA_chr01_G001295	4102	3	NB-ARC domain			OG0013770	no_significant_change	0.000131904	69143	0.6505	13232	-0.2975	19151	-0.4703	20222	1.0606	16538
893	PA_chr01_G001296	3453	2	TMV resistance protein N-like		TIR domain;NB-ARC domain	OG0013770	no_significant_change	0.00457496	69143	0.6505	13232	-0.2975	19151	-0.4703	20222	1.0606	16538
894	PA_chr01_G001298	16272	5	TMV resistance protein N-like		TIR domain;NB-ARC domain	OG0013770	no_significant_change	0.248827	55090	0.6479	13254	0.4211	18263	-2.1609	9843	-1.4685	13730
895	PA_chr01_G001299	410	1	TMV resistance protein N-like		NB-ARC domain	OG0025523	no_significant_change		46967	0.5269	14387	0.9924	13680	2.3988	8544	-2.0218	10356
896	PA_chr01_G001301	4199	4	TMV resistance protein N-like		TIR domain;NB-ARC domain	OG0013770	no_significant_change	0	39822	0.7052	12716	-0.9189	14236	-2.5938	7511	-3.0678	5359
897	PA_chr01_G001303	6751	4	TMV resistance protein N-like		TIR domain;NB-ARC domain	OG0013770	no_significant_change	0.243749	65520	0.5061	14575	0.4838	17763	-1.1217	16772	-1.0784	16410
898	PA_chr01_G001307	596	1	Belongs to the MIP aquaporin (TC 1.A.8) family		Major intrinsic protein				12814	0.6949	12814
899	PA_chr01_G001308	3853	3	TMV resistance protein N-like		TIR domain;NB-ARC domain	OG0013770	no_significant_change	1	54573	0.6437	13293	-1.311	11576	-1.472	14299	-1.2229	15405
900	PA_chr01_G001309	29972	4	membrane protein At1g16860-like			OG0012570	no_significant_change		35341	1.2176	7953	-1.6914	9578	1.841	11763	2.909	6047
901	PA_chr01_G001310	2048	4	Phosphoglycerate mutase family		Histidine phosphatase superfamily (branch 1)	OG0002789	no_significant_change	0.610632	63334	0.7077	12691	0.3603	18731	0.634	19585	1.6848	12327
902	PA_chr01_G001311	853	1	F-box kelch-repeat protein			OG0043680	no_significant_change		8070	1.2041	8070
903	PA_chr01_G001313	995	1				OG0043680	no_significant_change		8422	1.1651	8422
904	PA_chr01_G001315	1179	1	Tubulin is the major constituent of microtubules. It binds two moles of GTP, one at an exchangeable site on the beta chain and one at a non-exchangeable site on the alpha chain		Tubulin C-terminal domain;Tubulin/FtsZ family, GTPase domain	OG0000198	no_significant_change	1	10309	0.9578	10309
905	PA_chr01_G001317	473543	8	reductase		Aldo/keto reductase family	OG0008992	no_significant_change		14618	1.3193	7104	-4.9047	1300	3.259	4268	-4.1421	1946
906	PA_chr01_G001318	1062	1	Protein of unknown function (DUF 659)		hAT family C-terminal dimerisation region	OG0000797	expanded	1	11009	0.8846	11009
907	PA_chr01_G001321	1960	1			Domain of unknown function (DUF4283)	OG0000780	no_significant_change	1	40175	0.6649	13096	-0.4167	18293	-2.8045	6414	-3.9534	2372
908	PA_chr01_G001322	2754	4	Mediator of RNA polymerase II transcription subunit 10b-like		Transcription factor subunit Med10 of Mediator complex	OG0006570	no_significant_change	5.66246e-08	28359	0.762	12177	-2.9524	4925	-2.696	6987	-3.3377	4270
909	PA_chr01_G001324	1315	1	Toll - interleukin 1 - resistance			OG0043681	no_significant_change		70214	0.622	13500	-0.2355	19539	-0.7429	19063	-0.8213	18112
910	PA_chr01_G001327	51092	2	positive regulation of protein exit from endoplasmic reticulum		TIR domain	OG0043681	no_significant_change		39375	1.2022	8088	-1.2841	11730	-1.8667	11605	2.5005	7952
911	PA_chr01_G001328	7342	11	Nucleolin-like isoform X1		RNA recognition motif. (a.k.a. RRM, RBD, or RNP domain)	OG0000742	no_significant_change		54393	1.3393	6931	-0.7117	15912	1.1074	16871	1.3294	14679
912	PA_chr01_G001331	5182	1							46934	1.2043	8068	1.4042	11042	1.8348	11805	1.1333	16019
913	PA_chr01_G001333	1539	1	Catalyzes the phosphorylation of ribose at O-5 in a reaction requiring ATP and magnesium. The resulting D-ribose-5- phosphate can then be used either for sythesis of nucleotides, histidine, and tryptophan, or as a component of the pentose phosphate pathway		Glutathione S-transferase, N-terminal domain	OG0026032	no_significant_change	0.000654065	8644	1.1404	8644
914	PA_chr01_G001335	5401	3	homeobox-leucine zipper protein		Homeobox associated leucine zipper;Homeodomain	OG0017210	no_significant_change		46803	1.4706	5880	-0.5368	17345	-1.578	13533	-2.08	10045
915	PA_chr01_G001336	614	1				OG0011147	no_significant_change	1	11472	0.8358	11472
916	PA_chr01_G001337	330139	16	embryogenesis-associated protein		Serine aminopeptidase, S33	OG0004783	no_significant_change		12374	0.8262	11564	-6.9743	269	6.145	90	-5.3892	451
917	PA_chr01_G001338	1050	1							45229	0.6189	13528	-0.3568	18758	-5.4057	274	1.6307	12669
918	PA_chr01_G001344	24506	5	TMV resistance protein N-like		BspA type Leucine rich repeat region (6 copies);TIR domain;NB-ARC domain	OG0013000	no_significant_change	1	16957	0	16957
919	PA_chr01_G001345	6220	4	TMV resistance protein N-like		BspA type Leucine rich repeat region (6 copies);TIR domain;NB-ARC domain	OG0013000	no_significant_change	1	16957	0	16957
920	PA_chr01_G001348	2990	1			BspA type Leucine rich repeat region (6 copies)				12256	0.7536	12256
921	PA_chr01_G001349	1943	2	TMV resistance protein N-like		TIR domain;NB-ARC domain	OG0013000	no_significant_change	1	12256	0.7536	12256
922	PA_chr01_G001351	1816	2				OG0012429	no_significant_change	1	16957	0	16957
923	PA_chr01_G001352	5537	3	TMV resistance protein N-like		NB-ARC domain	OG0011730	no_significant_change	1	14051	0.5631	14051
924	PA_chr01_G001353	3551	2	Cyclin-dependent kinase		Protein kinase domain	OG0039127	no_significant_change		16957	0	16957
925	PA_chr01_G001354	2275	1				OG0031768	no_significant_change		16957	0	16957
926	PA_chr01_G001356	831	1	RNA-binding protein	Y14		OG0003857	no_significant_change	1	16957	0	16957
927	PA_chr01_G001357	1013	1	resistance protein		TIR domain	OG0017200	no_significant_change	1	16957	0	16957
928	PA_chr01_G001358	3367	1	TMV resistance protein N-like			OG0011730	no_significant_change	1	12006	0.7794	12006
929	PA_chr01_G001360	36921	1	Cyclin-dependent kinase		Protein kinase domain	OG0011051	no_significant_change	0.160125	16957	0	16957
930	PA_chr01_G001361	1067	1	resistance protein		TIR domain	OG0017200	no_significant_change	1	16957	0	16957
931	PA_chr01_G001362	1272	3	Cyclin-dependent kinase		Protein kinase domain	OG0002001	no_significant_change	1	14826	0.4776	14826
932	PA_chr01_G001363	784	1				OG0013771	no_significant_change	1	13270	0.6462	13270
933	PA_chr01_G001364	576	1	PFAM ribonuclease H			OG0000241	no_significant_change	1	13270	0.6462	13270
934	PA_chr01_G001365	1644	1	regulation of multicellular organismal development			OG0043683	no_significant_change		14902	0.4692	14902
935	PA_chr01_G001366	3074	1	TMV resistance protein N-like			OG0031769	no_significant_change		11192	0.8653	11192
936	PA_chr01_G001369	2311	2	TMV resistance protein N-like		Leucine Rich Repeat	OG0017211	no_significant_change	0.145654	47075	0.9111	10756	0.9183	14242	-1.8403	11770	-2.0312	10307
937	PA_chr01_G001370	3846	1							11702	0.812	11702
938	PA_chr01_G001371	5149	3	TMV resistance protein N-like		Leucine Rich repeats (2 copies);TIR domain;NB-ARC domain	OG0011730	no_significant_change	0.118725	33391	0.994	9977	2.6555	5837	-2.3374	8890	2.3462	8687
939	PA_chr01_G001373	4468	4	TMV resistance protein N-like		TIR domain;NB-ARC domain	OG0020224	no_significant_change	1	48180	0.9352	10523	-0.7346	15717	-1.9407	11131	-1.943	10809
940	PA_chr01_G001374	2376	1				OG0017212	no_significant_change		36560	1.524	5511	1.1342	12661	-2.5587	7695	-1.9623	10693
941	PA_chr01_G001375	6941	7	TMV resistance protein N-like		TIR domain;NB-ARC domain	OG0000157	no_significant_change		29426	1.9699	2974	-0.8211	15013	2.7082	6922	-3.2705	4517
942	PA_chr01_G001377	654	1				OG0031770	no_significant_change		48424	1.6423	4716	0.6708	16243	1.5314	13865	1.4887	13600
943	PA_chr01_G001378	2388	1							29246	1.4657	5922	2.752	5521	2.2189	9528	2.4345	8275
944	PA_chr01_G001381	1386	1	TIR domain		TIR domain	OG0020225	no_significant_change	1	9911	1.0011	9911
945	PA_chr01_G001382	1059	1			Leucine Rich repeats (2 copies)	OG0018487	no_significant_change	0.126275	3500	1.8501	3500
946	PA_chr01_G001383	3657	3	RESISTANCE protein		TIR domain;NB-ARC domain	OG0013772	no_significant_change	0.000118863	48589	1.2682	7525	0.9075	14327	-1.7925	12076	-1.3321	14661
947	PA_chr01_G001384	2365	3	TIR domain		Leucine rich repeat	OG0017211	no_significant_change	1	7936	1.2202	7936
948	PA_chr01_G001385	3876	4	TMV resistance protein N-like		TIR domain;NB-ARC domain;Leucine Rich Repeat	OG0017211	no_significant_change	0.0409453	52111	0.857	11272	0.9718	13840	-1.5215	13933	1.5696	13066
949	PA_chr01_G001386	3757	3	TMV resistance protein N-like		TIR domain;NB-ARC domain	OG0017198	no_significant_change	0.000915118	15198	0.4347	15198
950	PA_chr01_G001387	4671	4	TMV resistance protein N-like		Leucine rich repeat;TIR domain;NB-ARC domain	OG0017211	no_significant_change	0.147265	16338	0.2771	16338
951	PA_chr01_G001388	4059	4	TMV resistance protein N-like		TIR domain;NB-ARC domain	OG0017198	no_significant_change	0.00250903	13953	0.5733	13953
952	PA_chr01_G001389	225570	12	Belongs to the MICOS complex subunit Mic60 family		Mitochondrial inner membrane protein	OG0005159	no_significant_change		18078	1.3079	7199	2.6959	5714	-4.1725	1475	-3.4999	3690
953	PA_chr01_G001392	152964	5	Conserved gene of		AAA domain	OG0000582	no_significant_change	0.54849	24461	0.7165	12610	-2.4125	6661	-3.5469	3114	-4.0816	2076
954	PA_chr01_G001393	185445	7	superfamily. Protein		AAA domain;Alba	OG0000582	no_significant_change	1	16836	0.9431	10446	4.5086	1736	4.1024	1610	-3.7039	3044
955	PA_chr01_G001396	824	1				OG0002979	no_significant_change	1	16957	0	16957
956	PA_chr01_G001397	504649	14	superfamily. Protein		UvrD-like helicase C-terminal domain;AAA domain;UvrD/REP helicase N-terminal domain	OG0001136	no_significant_change		17927	1.1025	8975	3.4473	3650	-3.5452	3124	4.0344	2178
957	PA_chr01_G001398	11667	1	Reverse transcriptase (RNA-dependent DNA polymerase)		RNase H-like domain found in reverse transcriptase;Reverse transcriptase (RNA-dependent DNA polymerase)	OG0004162	no_significant_change	1	42235	0.9045	10820	1.1943	12260	2.5395	7795	1.8483	11360
958	PA_chr01_G001400	1289	1				OG0026033	no_significant_change	1	64477	0.4291	15247	0.292	19189	-1.4365	14553	-1.2114	15488
959	PA_chr01_G001402	502012	13	superfamily. Protein		UvrD-like helicase C-terminal domain;AAA domain;UvrD/REP helicase N-terminal domain	OG0001136	no_significant_change		6714	3.625	431	3.6621	3151	-3.6936	2641	5.3423	491
960	PA_chr01_G001403	90591	4	superfamily. Protein		UvrD-like helicase C-terminal domain;UvrD/REP helicase N-terminal domain	OG0001136	no_significant_change		20052	1.2635	7567	-4.466	1804	-2.6775	7078	3.5258	3603
961	PA_chr01_G001405	476	1							50688	0.9672	10222	-0.7137	15896	-1.55	13728	-1.9379	10842
962	PA_chr01_G001406	2616	3	L-gulonolactone		D-arabinono-1,4-lactone oxidase;FAD binding domain	OG0000569	no_significant_change	1	50804	0.6199	13520	-1.1575	12504	1.1366	16673	2.4683	8107
963	PA_chr01_G001407	1730	3	TPR and ankyrin repeat-containing protein			OG0000582	no_significant_change	0.0104763	66101	1.3657	6715	-0.1971	19733	-0.7034	19262	-0.3637	20391
964	PA_chr01_G001408	1914	1	Phospholipase A1-Igamma1		Lipase (class 3)	OG0020226	no_significant_change	1	64768	1.0424	9529	-0.5302	17397	0.8425	18519	0.6032	19323
965	PA_chr01_G001409	430	1				OG0010769	no_significant_change	1	10713	0.9155	10713
966	PA_chr01_G001410	2196	1	Lipase (class 3)		Lipase (class 3)	OG0020226	no_significant_change	2.90364e-05	71924	0.8597	11248	-0.3502	18804	-0.1707	20949	-0.1691	20923
967	PA_chr01_G001411	1700	1	Phospholipase A1-Igamma1		Lipase (class 3)	OG0020226	no_significant_change	1	54474	1.1624	8447	-0.9957	13658	1.0282	17402	-1.2881	14967
968	PA_chr01_G001412	2503	1	Phospholipase A1-Igamma1		Lipase (class 3)	OG0020226	no_significant_change	0.980193	73313	0.7318	12462	0.2207	19613	-0.3421	20599	-0.2872	20639
969	PA_chr01_G001413	2547	3	L-gulonolactone		D-arabinono-1,4-lactone oxidase;FAD binding domain	OG0000569	no_significant_change	1	12452	0.733	12452
970	PA_chr01_G001414	2564	3	L-gulonolactone		D-arabinono-1,4-lactone oxidase;FAD binding domain	OG0000569	no_significant_change	1	71141	0.9251	10619	0.2123	19658	-0.4433	20301	-0.3111	20563
971	PA_chr01_G001415	13223	3	L-gulonolactone		D-arabinono-1,4-lactone oxidase;FAD binding domain	OG0000569	no_significant_change	1	29996	0.8115	11706	1.931	8563	-3.04	5267	-3.2864	4460
972	PA_chr01_G001416	14063	3	L-gulonolactone		D-arabinono-1,4-lactone oxidase;FAD binding domain	OG0000569	no_significant_change	1	12091	1.2308	7844	5.0474	1170	3.873	2113	-4.8017	964
973	PA_chr01_G001417	13659	3	L-gulonolactone		D-arabinono-1,4-lactone oxidase;FAD binding domain	OG0000569	no_significant_change	1	69962	0.9796	10107	0.285	19238	-0.4673	20233	-0.3653	20384
974	PA_chr01_G001418	2494	3	L-gulonolactone		D-arabinono-1,4-lactone oxidase;FAD binding domain	OG0000569	no_significant_change	1	8334	1.175	8334
975	PA_chr01_G001419	2971	3	L-gulonolactone		D-arabinono-1,4-lactone oxidase;FAD binding domain	OG0000569	no_significant_change	1	66231	1.0366	9583	0.6278	16600	-0.632	19593	-0.3435	20455
976	PA_chr01_G001420	2374	1	phospholipase		Lipase (class 3)	OG0020226	no_significant_change	7.51023e-06	49822	0.6253	13468	0.6852	16132	-1.798	12046	-2.4549	8176
977	PA_chr01_G001421	194028	18	Large proline-rich protein		Ubiquitin family	OG0002187	no_significant_change	1	31913	1.5269	5494	1.5928	10053	-2.4028	8521	-2.5216	7845
978	PA_chr01_G001424	5150	1	DYW family of nucleic acid deaminases		PPR repeat family;PPR repeat	OG0031771	no_significant_change		56461	0.9568	10318	0.8974	14411	1.5436	13773	0.8443	17959
979	PA_chr01_G001425	3920	4	TMV resistance protein N-like		TIR domain;NB-ARC domain	OG0013770	no_significant_change	1	9157	1.0824	9157
980	PA_chr01_G001426	61097	10	Neutral ceramidase-like		Neutral/alkaline non-lysosomal ceramidase, C-terminal;Neutral/alkaline non-lysosomal ceramidase, N-terminal	OG0002181	no_significant_change	0.519661	24445	1.1685	8390	2.8674	5188	3.2131	4469	2.832	6398
981	PA_chr01_G001427	17565	2	Neutral ceramidase-like		Neutral/alkaline non-lysosomal ceramidase, C-terminal;Neutral/alkaline non-lysosomal ceramidase, N-terminal	OG0002181	no_significant_change	1	42536	0.949	10389	0.8164	15049	2.4738	8142	2.2956	8956
982	PA_chr01_G001428	4404	4	TMV resistance protein N-like		TIR domain;NB-ARC domain;Leucine Rich Repeat	OG0002074	no_significant_change	0.00512346	13740	0.5962	13740
983	PA_chr01_G001429	314338	11	Plays a central role in 2-thiolation of mcm(5)S(2)U at tRNA wobble positions of tRNA(Lys), tRNA(Glu) and tRNA(Gln). Directly binds tRNAs and probably acts by catalyzing adenylation of tRNAs, an intermediate required for 2-thiolation. It is unclear whether it acts as a sulfurtransferase that transfers sulfur from thiocarboxylated URM1 onto the uridine of tRNAs at wobble position	CTU1	Zinc-ribbon;PP-loop family	OG0007890	no_significant_change		20580	1.1835	8255	3.2783	4042	3.2856	4146	3.3772	4137
984	PA_chr01_G001434	60338	3	Lil3 protein			OG0003439	no_significant_change	1	20790	1.1996	8110	2.8633	5203	3.7643	2409	3.1306	5068
985	PA_chr01_G001435	377709	4	Ubiquitin family		Ubiquitin family	OG0000078	no_significant_change	1	20676	1.3509	6838	3.0024	4776	-3.0866	5051	3.4111	4011
986	PA_chr01_G001436	4583	1	Belongs to the protein kinase superfamily. Ser Thr protein kinase family		Leucine rich repeat;Leucine Rich repeats (2 copies);Leucine Rich Repeat;Protein kinase domain	OG0018489	no_significant_change	0.523215	42804	1.3509	6838	1.1833	12330	1.9083	11337	1.6893	12299
987	PA_chr01_G001437	1514	1	Ubiquitin exists either covalently attached to another protein, or free (unanchored). When covalently bound, it is conjugated to target proteins via an isopeptide bond either as a monomer (monoubiquitin), a polymer linked via different Lys residues of the ubiquitin (polyubiquitin chains) or a linear polymer linked via the initiator Met of the ubiquitin (linear polyubiquitin chains). Polyubiquitin…		Ubiquitin family	OG0000078	no_significant_change	1	11553	0.8274	11553
988	PA_chr01_G001438	1555	1	Ubiquitin exists either covalently attached to another protein, or free (unanchored). When covalently bound, it is conjugated to target proteins via an isopeptide bond either as a monomer (monoubiquitin), a polymer linked via different Lys residues of the ubiquitin (polyubiquitin chains) or a linear polymer linked via the initiator Met of the ubiquitin (linear polyubiquitin chains). Polyubiquitin…		Ubiquitin family	OG0000078	no_significant_change	1	53702	1.4895	5756	-0.6142	16706	1.0304	17386	1.4509	13854
989	PA_chr01_G001440	2337	1	Ubiquitin exists either covalently attached to another protein, or free (unanchored). When covalently bound, it is conjugated to target proteins via an isopeptide bond either as a monomer (monoubiquitin), a polymer linked via different Lys residues of the ubiquitin (polyubiquitin chains) or a linear polymer linked via the initiator Met of the ubiquitin (linear polyubiquitin chains). Polyubiquitin…		Ubiquitin family	OG0000078	no_significant_change	0.0313388	44704	1.1473	8578	-0.6399	16497	3.1357	4818	-1.3098	14811
990	PA_chr01_G001441	817	2				OG0003996	no_significant_change	1	11357	0.8482	11357
991	PA_chr01_G001442	1769	1				OG0003310	no_significant_change		16957	0	16957
992	PA_chr01_G001444	44431	4				OG0012365	no_significant_change	0.00480755	29749	1.1116	8894	-2.0955	7878	-2.7508	6698	-2.8561	6279
993	PA_chr01_G001445	398	1							46795	1.0811	9170	-0.4297	18201	-1.7864	12117	-2.6327	7307
994	PA_chr01_G001450	36175	9	receptor-like protein kinase		SPARK;Protein kinase domain	OG0004784	no_significant_change	1	23004	1.249	7683	4.094	2357	2.8268	6298	2.7703	6666
995	PA_chr01_G001451	195898	10	Neutral ceramidase-like		Neutral/alkaline non-lysosomal ceramidase, C-terminal;Neutral/alkaline non-lysosomal ceramidase, N-terminal	OG0002181	no_significant_change	1	7583	1.2728	7483	11.558	6	7.7095	8	-6.6146	86
996	PA_chr01_G001452	22226	2	Belongs to the RuvB family		TIP49 AAA-lid domain;TIP49 P-loop domain	OG0004053	no_significant_change	1	25305	1.0546	9414	-2.8965	5114	-2.873	6058	3.2187	4719
997	PA_chr01_G001453	8956	1				OG0002711	no_significant_change	1	51267	0.8596	11249	0.5907	16905	-1.666	12925	2.0513	10188
998	PA_chr01_G001454	4782	4	TMV resistance protein N-like		TIR domain;NB-ARC domain;Leucine Rich Repeat	OG0022477	no_significant_change		50768	0.7452	12335	0.8457	14810	-1.7064	12658	-1.9161	10965
999	PA_chr01_G001457	18077	4							44025	0.6058	13650	-1.1966	12243	2.4751	8133	2.0887	9999
1000	PA_chr01_G001461	1233	1	regulation of response to stimulus			OG0011730	no_significant_change	0.000839165	55241	0.7778	12021	0.5746	17045	-1.4324	14579	-1.8062	11596
1001	PA_chr01_G001462	2608	1			Leucine Rich Repeat				62010	1.2883	7358	0.5376	17341	0.7794	18870	-0.7672	18441
1002	PA_chr01_G001463	67270	3	APO protein		APO RNA-binding	OG0001128	no_significant_change	1	20106	1.3193	7104	-2.076	7956	-4.8846	597	3.2888	4449
1003	PA_chr01_G001464	792	2	Cinnamoyl-CoA reductase	CCR2		OG0019440	no_significant_change		53800	1.5531	5315	1.135	12655	0.9602	17818	0.8366	18012
1004	PA_chr01_G001465	2414	3	Taurine catabolism dioxygenase TauD, TfdA family		Taurine catabolism dioxygenase TauD, TfdA family	OG0000562	no_significant_change	1	48680	1.5435	5380	1.5449	10296	1.216	16105	-1.0095	16899
1005	PA_chr01_G001466	2449	3	Taurine catabolism dioxygenase TauD, TfdA family		Taurine catabolism dioxygenase TauD, TfdA family	OG0000562	no_significant_change	1	48223	1.8943	3279	0.8887	14479	-1.425	14633	1.1606	15832
1006	PA_chr01_G001467	76730	4	Mediates both low-affinity uptake and efflux of sugar across the membrane		Sugar efflux transporter for intercellular exchange	OG0001329	no_significant_change	1	21372	2.109	2441	-1.8875	8745	-2.5937	7512	-3.835	2674
1007	PA_chr01_G001469	3930	3	Taurine catabolism dioxygenase TauD, TfdA family		Taurine catabolism dioxygenase TauD, TfdA family	OG0000562	no_significant_change	1	2531	2.0847	2531
1008	PA_chr01_G001470	5076	4	Taurine catabolism dioxygenase TauD, TfdA family		Taurine catabolism dioxygenase TauD, TfdA family	OG0000562	no_significant_change	1	33078	1.3807	6594	0.9548	13968	-3.7133	2581	-2.1002	9935
1009	PA_chr01_G001471	7666	3	Taurine catabolism dioxygenase TauD, TfdA family		Taurine catabolism dioxygenase TauD, TfdA family	OG0000562	no_significant_change	1	41159	1.7434	4085	-1.2789	11758	1.6962	12727	-1.6429	12589
1010	PA_chr01_G001473	2159	3	Taurine catabolism dioxygenase TauD, TfdA family		Taurine catabolism dioxygenase TauD, TfdA family	OG0000562	no_significant_change	1	51783	1.7464	4066	-0.8246	14984	1.0393	17325	1.2224	15408
1011	PA_chr01_G001474	233046	17	DNA topoisomerase 2-binding protein		BRCT domain, a BRCA1 C-terminus domain;twin BRCT domain	OG0005760	no_significant_change		25889	1.1788	8299	2.7688	5473	3.197	4537	-2.5727	7580
1012	PA_chr01_G001475	98685	7	Belongs to the DHHC palmitoyltransferase family		DHHC palmitoyltransferase	OG0004560	no_significant_change	5.40627e-05	24023	1.7305	4160	2.6291	5929	2.3954	8563	3.0641	5371
1013	PA_chr01_G001476	25863	6	Regulator of Vps4 activity in the MVB pathway protein		Regulator of Vps4 activity in the MVB pathway	OG0000595	no_significant_change	1	29001	1.2265	7881	-3.1274	4411	2.2953	9114	2.5699	7595
1014	PA_chr01_G001477	60667	2				OG0005444	no_significant_change	1	29866	0.912	10747	2.3155	7048	-3.3327	3941	2.4651	8130
1015	PA_chr01_G001478	21311	1				OG0012636	no_significant_change	1	33708	1.0642	9323	1.3551	11339	2.5116	7941	3.1228	5105
1016	PA_chr01_G001479	133132	11	Myb-related protein		Myb-like DNA-binding domain	OG0016919	no_significant_change		19369	1.6973	4364	2.8917	5125	2.6969	6981	3.7569	2899
1017	PA_chr01_G001480	1013	1	ribonuclease H protein			OG0031756	no_significant_change		15514	0.3955	15514
1018	PA_chr01_G001481	4419	4	TMV resistance protein N-like		TIR domain;NB-ARC domain;Leucine Rich Repeat	OG0002074	no_significant_change	1.25585e-09	15133	0.4423	15133
1019	PA_chr01_G001482	4637	4				OG0013674	no_significant_change	1	34852	1.6851	4440	-0.9189	14236	-3.588	2972	1.5482	13204
1020	PA_chr01_G001483	2266	1				OG0008205	no_significant_change	1	43406	1.1862	8233	1.469	10692	-1.9545	11045	-1.5134	13436
1021	PA_chr01_G001485	1622	1			Tetratricopeptide repeat	OG0008205	no_significant_change	1	51000	1.1749	8335	0.7327	15735	1.5234	13923	-1.5796	13007
1022	PA_chr01_G001486	355884	8	NAD kinase 2		ATP-NAD kinase	OG0006751	no_significant_change	1	16756	1.2298	7854	4.6103	1616	-3.7526	2450	-3.1864	4836
1023	PA_chr01_G001491	29627	6	4-coumarate--CoA ligase-like	OPCL1	AMP-binding enzyme C-terminal domain;AMP-binding enzyme	OG0000277	no_significant_change	1	20876	1.3173	7120	4.2465	2105	-2.4883	8059	3.529	3592
1024	PA_chr01_G001497	5452	3	TMV resistance protein N-like		NB-ARC domain	OG0005523	no_significant_change	8.10679e-05	30690	1.0774	9203	0.7831	15318	-3.9248	1998	-3.3641	4171
1025	PA_chr01_G001498	771	1							62376	1.0774	9203	-0.2692	19341	1.0083	17530	1.0942	16302
1026	PA_chr01_G001499	30723	6	4-coumarate--CoA ligase-like	OPCL1	AMP-binding enzyme C-terminal domain;AMP-binding enzyme	OG0000277	no_significant_change	1	30572	1.7443	4081	-1.2176	12116	-2.494	8034	-2.8428	6341
1027	PA_chr01_G001500	856	1							46771	1.8923	3293	-1.0305	13395	1.304	15494	-1.343	14589
1028	PA_chr01_G001501	33021	6	4-coumarate--CoA ligase-like	OPCL1	AMP-binding enzyme C-terminal domain;AMP-binding enzyme	OG0000277	no_significant_change	1	20063	1.7873	3833	1.9618	8426	-3.5923	2960	3.1846	4844
1029	PA_chr01_G001502	972	1				OG0014226	no_significant_change	0.717415	36589	1.2124	7998	-0.4262	18228	-3.5458	3121	2.6475	7242
1030	PA_chr01_G001503	4298	2				OG0043686	no_significant_change		14266	0.5401	14266
1031	PA_chr01_G001504	2123	2	Cytochrome p450		Cytochrome P450	OG0000006	no_significant_change	1	4372	1.6958	4372
1032	PA_chr01_G001505	1721	2	Cytochrome p450		Cytochrome P450	OG0000006	no_significant_change	1	9649	1.0295	9649
1033	PA_chr01_G001506	2400	2	Belongs to the cytochrome P450 family		Cytochrome P450	OG0000006	no_significant_change	1	67007	0.8721	11128	0.3558	18764	-0.8893	18242	0.6907	18873
1034	PA_chr01_G001507	2105	2	Belongs to the cytochrome P450 family		Cytochrome P450	OG0000006	no_significant_change	1	67844	1.0157	9770	-0.467	17905	-0.5832	19801	-0.3697	20368
1035	PA_chr01_G001508	2223	2	Belongs to the cytochrome P450 family		Cytochrome P450	OG0000006	no_significant_change	1	4896	1.6149	4896
1036	PA_chr01_G001510	2203	2	Benzyl alcohol O-benzoyltransferase-like		Transferase family	OG0020227	no_significant_change	1	7823	1.2334	7823
1037	PA_chr01_G001514	2398	2	cytochrome P450		Cytochrome P450	OG0000006	no_significant_change	1	67874	0.7125	12646	0.4464	18069	-0.6812	19360	-0.8705	17799
1038	PA_chr01_G001515	2178	2	cytochrome P450		Cytochrome P450	OG0000006	no_significant_change	1	13179	0.6559	13179
1039	PA_chr01_G001516	2010	2	cytochrome P450		Cytochrome P450	OG0000006	no_significant_change	1	60041	1.4089	6381	0.2209	19611	-0.7141	19210	-1.3063	14839
1040	PA_chr01_G001521	2243	2	Benzyl alcohol O-benzoyltransferase-like		Transferase family	OG0020227	no_significant_change	1	34709	1.0248	9691	-3.0529	4637	-1.7029	12683	-2.5507	7698
1041	PA_chr01_G001522	2144	2	Belongs to the cytochrome P450 family		Cytochrome P450	OG0000006	no_significant_change	1	66541	0.8183	11642	-0.6003	16822	0.5152	20057	-0.8356	18020
1042	PA_chr01_G001523	2675	3	Cytochrome p450		Cytochrome P450	OG0000006	no_significant_change	1	52845	1.0243	9696	1.0445	13293	-1.3602	15096	-1.318	14760
1043	PA_chr01_G001524	625	1	cytochrome P450		Cytochrome P450				10653	0.9216	10653
1044	PA_chr01_G001525	1701	2	Cytochrome p450		Cytochrome P450	OG0000006	no_significant_change	1	10494	0.9382	10494
1045	PA_chr01_G001526	1905	1	Cytochrome p450		Cytochrome P450	OG0000006	no_significant_change	1	12950	0.6806	12950
1046	PA_chr01_G001527	1989	2	cytochrome P450		Cytochrome P450	OG0000006	no_significant_change	1	8831	1.1183	8831
1047	PA_chr01_G001528	2033	2	cytochrome P450		Cytochrome P450	OG0000006	no_significant_change	0.560034	8355	1.1726	8355
1048	PA_chr01_G001529	1952	2	Benzyl alcohol O-benzoyltransferase-like		Transferase family	OG0020227	no_significant_change	1	4797	1.6308	4797
1049	PA_chr01_G001530	1887	2	Benzyl alcohol O-benzoyltransferase-like		Transferase family	OG0020227	no_significant_change	1	6471	1.3976	6471
1050	PA_chr01_G001531	946	1	Benzyl alcohol O-benzoyltransferase-like		Transferase family	OG0043687	no_significant_change		57508	1.1252	8772	-0.5359	17352	0.8534	18465	1.5932	12919
1051	PA_chr01_G001532	1037	1	Benzyl alcohol O-benzoyltransferase-like		Transferase family	OG0043687	no_significant_change		11770	0.8046	11770
1052	PA_chr01_G001533	5855	4	TMV resistance protein N-like		TIR domain;NB-ARC domain;Leucine Rich Repeat	OG0005523	no_significant_change	1	54252	1.365	6720	0.7683	15439	1.0775	17067	-1.2794	15026
1053	PA_chr01_G001535	156451	6	4-coumarate--CoA ligase-like	OPCL1	AMP-binding enzyme C-terminal domain;AMP-binding enzyme	OG0000277	no_significant_change	1	10007	1.7131	4262	-3.549	3414	4.4948	975	4.4968	1356
1054	PA_chr01_G001536	59155	8	RNA recognition motif. (a.k.a. RRM, RBD, or RNP domain)		RNA recognition motif. (a.k.a. RRM, RBD, or RNP domain)	OG0007027	no_significant_change	1	25477	1.5617	5260	1.8242	9006	-3.1966	4539	2.7692	6672
1055	PA_chr01_G001538	2142	1	Zinc finger CCCH domain-containing protein		Zinc finger C-x8-C-x5-C-x3-H type (and similar)	OG0018367	no_significant_change		53588	1.3442	6890	0.9353	14119	-1.1202	16782	1.1654	15797
1056	PA_chr01_G001539	36188	2	Pentatricopeptide repeat-containing protein		DYW family of nucleic acid deaminases;PPR repeat family;PPR repeat	OG0000000	no_significant_change		32212	1.431	6194	1.6172	9925	-2.3918	8590	-2.59	7503
1057	PA_chr01_G001541	9745	3	Protein root UVB sensitive 1		Vitamin B6 photo-protection and homoeostasis	OG0006381	no_significant_change	1.78604e-07	39350	1.0861	9122	-1.011	13537	3.0418	5258	-1.8361	11433
1058	PA_chr01_G001543	454826	11	acyltransferase-like protein			OG0031774	no_significant_change		7045	1.959	3024	-5.353	964	-3.8927	2064	-4.7751	993
1059	PA_chr01_G001553	382975	13	Acyltransferase-like protein At1g54570		BAAT / Acyl-CoA thioester hydrolase C terminal;Diacylglycerol acyltransferase	OG0001228	no_significant_change	1	21336	1.0647	9318	-2.8693	5182	-3.5732	3021	3.4646	3815
1060	PA_chr01_G001555	1025	1				OG0001442	no_significant_change	1	14014	0.5671	14014
1061	PA_chr01_G001560	96450	1	Ubiquitin exists either covalently attached to another protein, or free (unanchored). When covalently bound, it is conjugated to target proteins via an isopeptide bond either as a monomer (monoubiquitin), a polymer linked via different Lys residues of the ubiquitin (polyubiquitin chains) or a linear polymer linked via the initiator Met of the ubiquitin (linear polyubiquitin chains). Polyubiquitin…		Ubiquitin family	OG0000078	no_significant_change	1	31640	0.8269	11557	1.9319	8559	2.9568	5644	-2.9447	5880
1062	PA_chr01_G001561	12525	6	4-coumarate--CoA ligase-like	OPCL1	AMP-binding enzyme C-terminal domain;AMP-binding enzyme	OG0000277	no_significant_change	0.448015	16957	0	16957
1063	PA_chr01_G001564	2558	6	AMP-binding enzyme C-terminal domain	OPCL1	AMP-binding enzyme C-terminal domain;AMP-binding enzyme	OG0004955	no_significant_change	1	16957	0	16957
1064	PA_chr01_G001572	7051	6	4-coumarate--CoA ligase-like	OPCL1	AMP-binding enzyme C-terminal domain;AMP-binding enzyme	OG0000277	no_significant_change	1	37005	1.2557	7626	-1.8749	8793	1.981	10889	2.1459	9697
1065	PA_chr01_G001574	41325	7	Protein GAMETE EXPRESSED			OG0003694	no_significant_change	1	29937	0.6557	13181	3.1283	4409	2.8688	6086	2.8613	6261
1066	PA_chr01_G001575	2867	3	disease resistance		Leucine Rich Repeat	OG0003577	no_significant_change	0.432692	41308	1.0631	9334	1.5776	10120	-2.0687	10364	1.8255	11490
1067	PA_chr01_G001576	4332	4	TMV resistance protein N-like		TIR domain;NB-ARC domain;Leucine Rich Repeat	OG0002074	no_significant_change	0.0206805	13042	0.6705	13042
1068	PA_chr01_G001577	398	1				OG0022470	no_significant_change	1	13042	0.6705	13042
1069	PA_chr01_G001578	535	1	Ribonuclease H protein			OG0026034	no_significant_change	1	13042	0.6705	13042
1070	PA_chr01_G001579	940	2	glutathione synthetase	GSH2	Eukaryotic glutathione synthase, ATP binding domain	OG0014807	no_significant_change	1	13624	0.6085	13624
1071	PA_chr01_G001580	4387	4	TMV resistance protein N-like		TIR domain;NB-ARC domain;Leucine Rich Repeat	OG0002074	no_significant_change	0.340195	14594	0.5038	14594
1072	PA_chr01_G001581	697	1	ribonuclease H protein			OG0031756	no_significant_change		14594	0.5038	14594
1073	PA_chr01_G001582	414	1				OG0018491	no_significant_change	1	15553	0.3912	15553
1074	PA_chr01_G001584	2806	3	TMV resistance protein N-like		TIR domain;NB-ARC domain	OG0002074	no_significant_change	0	14244	0.5424	14244
1075	PA_chr01_G001585	559	1	Ribonuclease H protein			OG0026034	no_significant_change	1	15339	0.4178	15339
1076	PA_chr01_G001586	1189	2				OG0043689	no_significant_change		14394	0.5261	14394
1077	PA_chr01_G001587	1006	1	F-box kelch-repeat protein			OG0018492	no_significant_change	1	14394	0.5261	14394
1078	PA_chr01_G001589	4097	4	TMV resistance protein N-like		Leucine rich repeat;TIR domain;NB-ARC domain;Leucine Rich Repeat	OG0002074	no_significant_change	1.40106e-05	53277	0.7985	11826	3.5234	3470	-0.5525	19913	-0.8276	18068
1079	PA_chr01_G001590	563	1				OG0022470	no_significant_change	0.515134	13886	0.5806	13886
1080	PA_chr01_G001591	1407	2				OG0018491	no_significant_change	2.93759e-05	13886	0.5806	13886
1081	PA_chr01_G001592	3087	3	TMV resistance protein N-like		TIR domain;NB-ARC domain	OG0002074	no_significant_change	0.320309	14007	0.5678	14007
1082	PA_chr01_G001593	373	1				OG0016229	no_significant_change	4.83617e-05	14912	0.468	14912
1083	PA_chr01_G001594	1063	2	PDDEXK-like family of unknown function			OG0016229	no_significant_change	1	14168	0.5507	14168
1084	PA_chr01_G001595	4318	4	TMV resistance protein N-like		Leucine rich repeat;TIR domain;NB-ARC domain	OG0002074	no_significant_change	0.000763169	15111	0.4451	15111
1085	PA_chr01_G001596	537	1				OG0022470	no_significant_change	1	10319	0.9566	10319
1086	PA_chr01_G001598	659	1	ribonuclease H protein			OG0012637	no_significant_change	1	12927	0.683	12927
1087	PA_chr01_G001599	3988	4	TMV resistance protein N-like		TIR domain;NB-ARC domain;Leucine Rich Repeat	OG0002074	no_significant_change	0.00516773	13020	0.6729	13020
1088	PA_chr01_G001601	83402	3	Pentatricopeptide repeat-containing protein		PPR repeat family;PPR repeat	OG0006566	no_significant_change	1	21371	1.1566	8498	3.6757	3123	-3.1507	4748	3.144	5002
1089	PA_chr01_G001602	1760	1			TCP family transcription factor	OG0015463	no_significant_change	0.0183319	59934	0.5446	14223	0.6128	16714	-1.553	13704	1.2399	15293
1090	PA_chr01_G001603	65795	18	homeobox-leucine zipper protein		MEKHLA domain;START domain;Homeodomain				19614	1.2282	7867	4.7062	1523	2.455	8239	-4.1209	1985
1091	PA_chr01_G001605	431	1				OG0043690	no_significant_change		59526	0.8805	11047	0.6071	16759	-1.5226	13928	0.8717	17792
1092	PA_chr01_G001606	28847	4	Photosystem I reaction center subunit IV		Photosystem I reaction centre subunit IV / PsaE	OG0005649	no_significant_change		30367	0.9174	10694	2.1157	7787	-2.896	5947	-2.9322	5939
1093	PA_chr01_G001607	1837	1				OG0004281	no_significant_change	1	39860	0.8529	11312	1.3441	11396	-2.2841	9174	-2.4959	7978
1094	PA_chr01_G001608	4250	6	Cytokinin-activating enzyme working in the direct activation pathway. Phosphoribohydrolase that converts inactive cytokinin nucleotides to the biologically active free-base forms		Possible lysine decarboxylase	OG0000290	no_significant_change	1	50417	0.8057	11761	-0.8324	14919	-1.8486	11718	-1.7354	12019
1095	PA_chr01_G001610	5905	7	Cytokinin-activating enzyme working in the direct activation pathway. Phosphoribohydrolase that converts inactive cytokinin nucleotides to the biologically active free-base forms		Possible lysine decarboxylase	OG0000290	no_significant_change	1	45496	1.6581	4608	0.8416	14843	-1.5484	13740	-1.6884	12305
1096	PA_chr01_G001611	732	1				OG0031775	no_significant_change		69412	0.4241	15288	-0.6507	16412	-0.7374	19090	-0.7386	18622
1097	PA_chr01_G001612	168064	6				OG0007896	no_significant_change		24152	0.5117	14523	3.569	3372	-4.1843	1456	-3.1949	4801
1098	PA_chr01_G001613	279065	24	serine threonine-protein kinase		Protein kinase domain	OG0000501	no_significant_change	1	18219	0.6966	12798	3.6751	3124	4.5851	880	4.4543	1417
1099	PA_chr01_G001614	261041	10	ABC transporter B family member 29		ABC transporter transmembrane region;ABC transporter	OG0009644	no_significant_change		17156	0.8828	11025	3.388	3783	4.1847	1454	-4.8635	894
1100	PA_chr01_G001616	70255	3	RING-H2 finger protein		Ring finger domain	OG0003373	no_significant_change	1	35295	0.7335	12447	-1.3188	11530	-2.3867	8619	-3.8274	2699
1101	PA_chr01_G001617	44309	3	RESISTANCE protein		TIR domain;NB-ARC domain	OG0000021	no_significant_change		49741	1.2904	7339	1.1773	12375	1.3649	15064	-1.2887	14963
1102	PA_chr01_G001618	993	1				OG0005984	no_significant_change	1	55635	0.8608	11237	-0.5782	17015	1.5692	13597	1.4603	13786
1103	PA_chr01_G001619	4739	4	TMV resistance protein N-like		TIR domain;NB-ARC domain	OG0020228	no_significant_change	1	39117	0.6421	13309	1.568	10169	2.5566	7709	-2.5049	7930
1104	PA_chr01_G001620	4863	10	glycerophosphodiester phosphodiesterase		Glycerophosphoryl diester phosphodiesterase family	OG0011701	no_significant_change	1	49033	0.8527	11314	-0.6231	16641	1.9533	11049	2.0829	10029
1105	PA_chr01_G001623	350923	15	DNA-directed primase polymerase		Herpesviridae UL52/UL70 DNA primase	OG0009338	no_significant_change		22072	1.2088	8029	3.6447	3193	3.19	4569	2.8555	6281
1106	PA_chr01_G001625	83210	3	RING-H2 zinc finger domain		Ring finger domain	OG0006022	no_significant_change	1	24605	1.0412	9541	2.7988	5382	3.061	5162	3.2699	4520
1107	PA_chr01_G001626	1262	1	Family of unknown function (DUF716)		Family of unknown function (DUF716)	OG0001149	no_significant_change		66794	0.9499	10381	0.3114	19064	0.7263	19143	-0.8058	18206
1108	PA_chr01_G001627	2284	1	Family of unknown function (DUF716)		Family of unknown function (DUF716)	OG0001149	no_significant_change		55590	0.5156	14486	1.1722	12412	-1.1949	16259	-1.6674	12433
1109	PA_chr01_G001628	1516	2	NB-ARC domain			OG0020229	no_significant_change	0.000214267	44052	0.759	12206	1.5871	10084	1.7402	12437	2.223	9325
1110	PA_chr01_G001629	1464	1	Family of unknown function (DUF716)		Family of unknown function (DUF716)	OG0001149	no_significant_change		56748	0.5187	14459	1.7558	9298	-1.3876	14902	0.8246	18089
1111	PA_chr01_G001630	1674	1	Family of unknown function (DUF716)		Family of unknown function (DUF716)	OG0001149	no_significant_change		68056	0.7512	12279	0.3794	18586	0.8652	18387	0.7046	18804
1112	PA_chr01_G001631	8232	2							53266	0.7512	12279	0.6412	16488	-1.6822	12817	-1.7923	11682
1113	PA_chr01_G001632	1218	1	Transmembrane protein 45A-like		Family of unknown function (DUF716)	OG0001149	no_significant_change		68796	0.6602	13140	0.3856	18536	-0.6259	19626	0.9185	17494
1114	PA_chr01_G001633	1255	1	Family of unknown function (DUF716)		Family of unknown function (DUF716)	OG0001149	no_significant_change		59482	0.5699	13986	0.6307	16576	-1.6002	13372	1.2024	15548
1115	PA_chr01_G001634	1540	1	Transmembrane protein 45A-like		Family of unknown function (DUF716)	OG0001149	no_significant_change		54746	0.5562	14118	1.0493	13259	-1.173	16413	1.9176	10956
1116	PA_chr01_G001635	511	1							63184	0.5562	14118	1.0291	13405	-1.173	16413	-0.6182	19248
1117	PA_chr01_G001636	1451	1	Transmembrane protein 45A-like		Family of unknown function (DUF716)	OG0001149	no_significant_change		66813	0.8304	11523	0.4724	17860	0.8012	18755	0.7293	18675
1118	PA_chr01_G001637	1556	3	Proteinase inhibitor			OG0004805	no_significant_change	1	8659	1.1382	8659
1119	PA_chr01_G001638	941	3	Proteinase inhibitor		Potato type II proteinase inhibitor family	OG0004805	no_significant_change	1	12529	0.725	12529
1120	PA_chr01_G001639	773	1				OG0017213	no_significant_change	0.00469442	12719	0.7049	12719
1121	PA_chr01_G001640	1370	1	Family of unknown function (DUF716)		Family of unknown function (DUF716)	OG0001149	no_significant_change		57558	1.1086	8918	-0.8771	14567	1.169	16440	-0.897	17633
1122	PA_chr01_G001641	1347	1	Family of unknown function (DUF716)		Family of unknown function (DUF716)	OG0001149	no_significant_change		70884	0.8143	11680	-0.3991	18428	-0.3733	20514	0.3982	20262
1123	PA_chr01_G001644	1719	1	Family of unknown function (DUF716)		Family of unknown function (DUF716)	OG0001149	no_significant_change		56331	1.222	7918	0.8732	14599	-0.9488	17884	1.1464	15930
1124	PA_chr01_G001645	23042	1	Transmembrane protein 45A-like		Family of unknown function (DUF716)	OG0001149	no_significant_change		48865	0.8135	11688	1.0318	13385	-2.017	10681	-1.5627	13111
1125	PA_chr01_G001646	1516	1	Transmembrane protein 45A-like		Family of unknown function (DUF716)	OG0001149	no_significant_change		73315	0.8135	11688	-0.2504	19452	-0.0436	21096	0.0759	21079
1126	PA_chr01_G001647	1584	1	Transmembrane protein 45A-like		Family of unknown function (DUF716)	OG0001149	no_significant_change		56051	1.1296	8736	0.8006	15180	-1.2521	15844	-1.096	16291
1127	PA_chr01_G001648	1434	1	Transmembrane protein 45A-like		Family of unknown function (DUF716)	OG0001149	no_significant_change		59868	0.5078	14559	0.938	14099	1.3194	15378	1.1606	15832
1128	PA_chr01_G001649	1370	1	Transmembrane protein 45A-like		Family of unknown function (DUF716)	OG0001149	no_significant_change		53150	1.3876	6543	-1.3307	11471	0.6363	19576	-1.2002	15560
1129	PA_chr01_G001650	1219	1	Family of unknown function (DUF716)		Family of unknown function (DUF716)	OG0001149	no_significant_change		62108	1.0137	9790	0.5674	17107	1.3277	15323	0.4841	19888
1130	PA_chr01_G001651	12961	3	Belongs to the mitochondrial carrier (TC 2.A.29) family		Mitochondrial carrier protein				33802	0.6865	12894	2.8253	5304	-2.8928	5960	-2.1575	9644
1131	PA_chr01_G001652	1643	1	Family of unknown function (DUF716)		Family of unknown function (DUF716)	OG0001149	no_significant_change		57238	1.0566	9395	0.4844	17759	1.3675	15041	-1.2757	15043
1132	PA_chr01_G001653	1533	1	Family of unknown function (DUF716)		Family of unknown function (DUF716)	OG0001149	no_significant_change		53956	1.0741	9236	0.7176	15860	-1.8137	11941	-1.0063	16919
1133	PA_chr01_G001654	49896	3	Protein of unknown function (DUF1218)		Protein of unknown function (DUF1218)	OG0001670	no_significant_change	1	28638	0.833	11499	1.7792	9189	2.9972	5460	3.9095	2490
1134	PA_chr01_G001657	13225	1							44824	0.8945	10913	0.9976	13643	2.3084	9045	1.8732	11223
1135	PA_chr01_G001658	53118	5				OG0006267	no_significant_change	0.00817788	40167	0.831	11517	-1.1599	12490	-3.1861	4589	1.8102	11571
1136	PA_chr01_G001661	69458	4	synthase			OG0006267	no_significant_change	1	42137	0.6073	13635	1.4414	10844	-2.5851	7557	-2.0678	10101
1137	PA_chr01_G001663	5449	1	disease resistance protein		BspA type Leucine rich repeat region (6 copies)	OG0016024	no_significant_change	0.0590938	38207	0.6309	13414	2.4381	6567	-2.5983	7490	1.9552	10736
1138	PA_chr01_G001666	472	1							41288	1.412	6353	2.31	7067	0.9972	17600	2.0378	10268
1139	PA_chr01_G001667	5924	4	growth-regulating factor		QLQ;WRC	OG0000683	no_significant_change	1	53850	1.1481	8570	1.1247	12725	-1.3939	14851	-0.8865	17704
1140	PA_chr01_G001668	966	1	TATA-box-binding protein		Transcription factor TFIID (or TATA-binding protein, TBP)				65289	0.7999	11813	-0.7571	15530	0.7871	18822	-0.6421	19124
1141	PA_chr01_G001669	792	1				OG0002979	no_significant_change	1	10875	0.8987	10875
1142	PA_chr01_G001670	56596	8	RRNA-processing protein		rRNA-processing protein Efg1	OG0007348	no_significant_change		38946	1.1233	8788	0.936	14113	-2.5012	7999	-2.4803	8046
1143	PA_chr01_G001671	825	1				OG0004670	no_significant_change	0.0472614	59505	1.034	9608	-0.196	19741	1.9002	11393	0.7123	18763
1144	PA_chr01_G001672	5084	1	Subtilisin-like protease		Fibronectin type-III domain;Peptidase inhibitor I9;PA domain;Subtilase family	OG0000005	no_significant_change		58412	1.3661	6712	0.7778	15366	0.8772	18307	0.8336	18027
1145	PA_chr01_G001673	121206	8	Ribosome biogenesis protein SLX9		Ribosome biogenesis protein SLX9	OG0008371	no_significant_change		39713	0.5163	14481	-1.6904	9581	-2.5242	7880	-2.5372	7771
1146	PA_chr01_G001674	399	1							67362	0.4664	14926	0.1505	19937	-1.3564	15122	-0.9374	17377
1147	PA_chr01_G001675	3761	2	Mitochondrial ribosomal protein L31			OG0011423	no_significant_change		57755	0.3363	15969	-0.9406	14078	-1.4188	14678	-1.5758	13030
1148	PA_chr01_G001676	1210	2				OG0002405	no_significant_change	1	53859	1.052	9436	-0.7045	15970	1.2421	15917	1.6508	12536
1149	PA_chr01_G001677	3777	4	TMV resistance protein N-like		TIR domain;NB-ARC domain	OG0005523	no_significant_change	0.42122	58977	0.8135	11688	-1.1961	12247	0.9215	18049	0.9956	16993
1150	PA_chr01_G001679	19356	4	Cen-like protein	TFL1	Phosphatidylethanolamine-binding protein	OG0011940	no_significant_change	1	16847	0.15	16847
1151	PA_chr01_G001680	1736	4	Cen-like protein	TFL1		OG0011940	no_significant_change	1	67477	1.0135	9792	0.3483	18818	-0.4864	20156	-0.7227	18711
1152	PA_chr01_G001681	51918	3	Protein MOTHER of FT and TF			OG0011940	no_significant_change	1	27309	0.9561	10324	-2.0258	8153	-3.0714	5115	-3.4917	3717
1153	PA_chr01_G001682	1836	4	Cen-like protein	TFL1	Phosphatidylethanolamine-binding protein	OG0011940	no_significant_change	1	55629	1.0692	9281	-0.8351	14897	-1.2057	16179	-1.2423	15272
1154	PA_chr01_G001683	1456	4	Cen-like protein	TFL1		OG0011940	no_significant_change	0.0982393	43247	1.5955	5034	1.2628	11848	-2.335	8902	0.9237	17463
1155	PA_chr01_G001684	1231	2				OG0002405	no_significant_change	1	73116	0.8461	11376	0.245	19485	-0.0249	21107	0.002	21148
1156	PA_chr01_G001685	38744	1				OG0002405	no_significant_change	1	62350	1.2027	8083	0.6044	16784	-0.6525	19499	-0.8407	17984
1157	PA_chr01_G001686	1148	2				OG0002405	no_significant_change	1	11201	0.8644	11201
1158	PA_chr01_G001687	1386	1				OG0002405	no_significant_change	1	65605	1.5744	5174	-0.1814	19810	-0.1098	21033	-0.5485	19588
1159	PA_chr01_G001688	1340	1				OG0002405	no_significant_change	1	64786	0.7193	12583	0.7409	15662	-1.0749	17085	-0.5754	19456
1160	PA_chr01_G001689	694	1				OG0002405	no_significant_change	1	73421	0.6491	13244	0.4474	18059	0.0018	21130	-0.14	20988
1161	PA_chr01_G001690	1132	1				OG0002405	no_significant_change	1	12566	0.7211	12566
1162	PA_chr01_G001691	364	1				OG0031777	no_significant_change		8828	1.1186	8828
1163	PA_chr01_G001692	1597	1	This b-type cytochrome is tightly associated with the reaction center of photosystem II (PSII). PSII is a light-driven water plastoquinone oxidoreductase that uses light energy to abstract electrons from H(2)O, generating O(2) and a proton gradient subsequently used for ATP formation. It consists of a core antenna complex that captures photons, and an electron transfer chain that converts photoni…	psbE	Lumenal portion of Cytochrome b559, alpha (gene psbE) subunit;Cytochrome b559, alpha (gene psbE) and beta (gene psbF)subunits	OG0004428	no_significant_change		8828	1.1186	8828
1164	PA_chr01_G001695	3361	1	ATP-dependent Clp protease proteolytic subunit	clpP	Clp protease	OG0003939	no_significant_change	1	16957	0	16957
1165	PA_chr01_G001698	1688	1	Component of the dark-operative protochlorophyllide reductase (DPOR) that uses Mg-ATP and reduced ferredoxin to reduce ring D of protochlorophyllide (Pchlide) to form chlorophyllide a (Chlide). This reaction is light-independent. The NB-protein (ChlN-ChlB) is the catalytic component of the complex	chlB	Proto-chlorophyllide reductase 57 kD subunit;Nitrogenase component 1 type Oxidoreductase	OG0011315	no_significant_change		16957	0	16957
1166	PA_chr01_G001699	1787	1	Usually encoded in the trnK tRNA gene intron. Probably assists in splicing its own and other chloroplast group II introns	matK	MatK/TrnK amino terminal region	OG0003652	no_significant_change		12546	0.7233	12546
1167	PA_chr01_G001700	1194	1	Usually encoded in the trnK tRNA gene intron. Probably assists in splicing its own and other chloroplast group II introns	matK	MatK/TrnK amino terminal region;Type II intron maturase	OG0003652	no_significant_change		12546	0.7233	12546
1168	PA_chr01_G001701	1224	1				OG0002405	no_significant_change	1	12070	0.7728	12070
1169	PA_chr01_G001702	870	1							7686	1.2487	7686
1170	PA_chr01_G001703	9683	2				OG0002405	no_significant_change	1	42884	1.0945	9046	-1.5231	10419	-1.8728	11563	1.7619	11856
1171	PA_chr01_G001704	841	1				OG0020230	no_significant_change	1	52856	0.9234	10635	-1.449	10801	1.4737	14289	-0.9752	17131
1172	PA_chr01_G001707	1140	1				OG0002405	no_significant_change	1	48630	1.2561	7622	-1.4965	10550	-0.8985	18180	-1.6932	12278
1173	PA_chr01_G001708	1174	1				OG0002405	no_significant_change	1	49470	1.2561	7622	-0.9603	13930	2.0549	10454	-0.9236	17464
1174	PA_chr01_G001709	951	1			NPR1 interacting	OG0002405	no_significant_change	1	65354	0.9265	10605	0.3555	18767	1.1372	16668	0.6045	19314
1175	PA_chr01_G001714	1222	1				OG0002405	no_significant_change	1	36659	0.9152	10716	2.5475	6189	-2.1097	10140	2.1651	9614
1176	PA_chr01_G001715	1084	1				OG0002405	no_significant_change	1	56090	1.0969	9024	0.7677	15444	-1.4555	14421	-0.9657	17201
1177	PA_chr01_G001716	1022	1				OG0002405	no_significant_change	1	11406	0.8425	11406
1178	PA_chr01_G001717	714	1				OG0002405	no_significant_change	1	69790	0.9788	10115	-0.2018	19706	0.7356	19102	0.199	20867
1179	PA_chr01_G001719	5409	1							33011	1.0573	9388	-2.2129	7421	1.9553	11039	3.1094	5163
1180	PA_chr01_G001720	687	1				OG0017214	no_significant_change	1	58104	0.8154	11670	-0.5716	17071	-1.2332	15977	-1.5209	13386
1181	PA_chr01_G001721	1202	1				OG0002405	no_significant_change	1	58872	0.6933	12828	0.8771	14567	1.1785	16373	1.267	15104
1182	PA_chr01_G001722	1173	1			NPR1 interacting	OG0002405	no_significant_change	0.0173285	57166	1.6768	4494	0.9077	14325	0.8882	18248	0.4364	20099
1183	PA_chr01_G001723	95298	2	OTU domain-containing protein		OTU-like cysteine protease	OG0007352	no_significant_change		27383	0.8269	11557	2.0782	7949	-3.2576	4273	-3.5257	3604
1184	PA_chr01_G001724	4168	4	Alpha/beta hydrolase family		alpha/beta hydrolase fold	OG0001797	no_significant_change	1	52650	1.1827	8261	-0.7788	15356	1.2208	16075	1.5872	12958
1185	PA_chr01_G001725	3634	1			PPR repeat family;PPR repeat	OG0000647	expanded		13016	0.6733	13016
1186	PA_chr01_G001727	872	1			PPR repeat family;PPR repeat	OG0022480	no_significant_change	1	14194	0.5477	14194
1187	PA_chr01_G001728	613	1			PPR repeat family;PPR repeat	OG0000647	expanded		9465	1.049	9465
1188	PA_chr01_G001730	63993	3			PPR repeat family;PPR repeat	OG0000647	expanded		10789	0.9077	10789
1189	PA_chr01_G001731	947	1	Pentatricopeptide repeat-containing protein		PPR repeat family;PPR repeat	OG0002438	no_significant_change	1	13825	0.5872	13825
1190	PA_chr01_G001732	754	1	Belongs to the 'GDSL' lipolytic enzyme family			OG0025535	no_significant_change		15343	0.4172	15343
1191	PA_chr01_G001733	1898	1			PPR repeat family;PPR repeat	OG0002438	no_significant_change	1	15032	0.4542	15032
1192	PA_chr01_G001734	4678	1			PPR repeat family;PPR repeat	OG0000647	expanded		11363	0.8474	11363
1193	PA_chr01_G001735	1245	1			PPR repeat family;PPR repeat	OG0002438	no_significant_change	0	11363	0.8474	11363
1194	PA_chr01_G001740	1076	1							63121	0.6213	13506	0.4809	17785	-0.9392	17945	-1.447	13885
1195	PA_chr01_G001741	1834	2	Raffinose synthase or seed imbibition protein Sip1	STS	Raffinose synthase or seed imbibition protein Sip1	OG0012386	no_significant_change	1	8774	1.125	8774
1196	PA_chr01_G001742	752	1	endonuclease activity		PPR repeat family	OG0013285	no_significant_change	1	16537	0.2376	16537
1197	PA_chr01_G001743	4522	3	NAC domain-containing protein	NAC5	No apical meristem (NAM) protein	OG0000118	no_significant_change	1	53655	1.2668	7538	0.6166	16691	-1.5092	14029	-1.2238	15397
1198	PA_chr01_G001744	3735	2	TMV resistance protein N-like		Leucine Rich Repeat	OG0005523	no_significant_change	0.407023	75199	0.5323	14335	0.1178	20066	-0.4209	20374	-0.3526	20424
1199	PA_chr01_G001745	3061	1	ABC transporter G family member		ABC transporter	OG0025285	no_significant_change	1	35885	0.7609	12187	2.547	6191	-2.0868	10272	-2.649	7235
1200	PA_chr01_G001747	3244	2	ABC transporter G family member		ABC transporter	OG0025285	no_significant_change	2.10041e-05	57156	0.8161	11663	0.4127	18324	-1.4552	14423	-1.6184	12746
1201	PA_chr01_G001748	2499	1	ABC transporter G family member		ABC transporter	OG0025285	no_significant_change	0.363447	12783	0.6983	12783
1202	PA_chr01_G001749	2007	4	Cen-like protein	TFL1		OG0011940	no_significant_change	1	59895	0.8401	11430	0.6322	16564	-0.8608	18417	-1.5057	13484
1203	PA_chr01_G001750	4792	3	TMV resistance protein N-like		NB-ARC domain;Leucine Rich Repeat	OG0005523	no_significant_change	0.00568729	10670	0.9198	10670
1204	PA_chr01_G001752	5396	4	TMV resistance protein N-like		NB-ARC domain;Leucine Rich Repeat	OG0005523	no_significant_change	0.114327	13197	0.6541	13197
1205	PA_chr01_G001754	2936	1	Belongs to the disease resistance NB-LRR family			OG0012171	no_significant_change	1	14203	0.5467	14203
1206	PA_chr01_G001755	1302	3	Belongs to the peptidase S10 family		Serine carboxypeptidase	OG0010348	no_significant_change	1	10971	0.8886	10971
1207	PA_chr01_G001757	1891	5	High mobility group B protein			OG0011146	no_significant_change	1	16250	0.2903	16250
1208	PA_chr01_G001758	6121	4	TMV resistance protein N-like		TIR domain;NB-ARC domain;Leucine Rich Repeat	OG0005523	no_significant_change	1	15649	0.3792	15649
1209	PA_chr01_G001759	7668	3	TMV resistance protein N-like		NB-ARC domain;Leucine Rich Repeat	OG0005523	no_significant_change	8.05358e-07	16298	0.2836	16298
1210	PA_chr01_G001760	20397	1	ADP binding		NB-ARC domain	OG0012171	no_significant_change	1	12759	0.7009	12759
1211	PA_chr01_G001761	7856	4	TMV resistance protein N-like		TIR domain;NB-ARC domain;Leucine Rich Repeat	OG0005523	no_significant_change	1.57008e-06	13950	0.5736	13950
1212	PA_chr01_G001762	20136	2	beta-galactosidase		Beta-sandwich domain in beta galactosidase	OG0008592	no_significant_change		12780	0.6986	12780
1213	PA_chr01_G001763	1936	3	Protein ALWAYS EARLY			OG0001795	no_significant_change	1	16520	0.2423	16520
1214	PA_chr01_G001764	1875	3	Belongs to the glycosyl hydrolase 17 family		X8 domain	OG0000150	no_significant_change	1	11521	0.8306	11521
1215	PA_chr01_G001765	5503	3	TMV resistance protein N-like		NB-ARC domain;Leucine Rich Repeat	OG0005523	no_significant_change	0.00181783	11947	0.7858	11947
1216	PA_chr01_G001766	43442	4	Belongs to the peptidase S10 family		Serine carboxypeptidase	OG0010348	no_significant_change	1	10212	0.9682	10212
1217	PA_chr01_G001768	18099	1	Belongs to the disease resistance NB-LRR family			OG0012171	no_significant_change	1	11900	0.7907	11900
1218	PA_chr01_G001769	329118	19	beta-galactosidase	BGAL10	Beta-sandwich domain in beta galactosidase;Galactose binding lectin domain;Glycosyl hydrolases family 35	OG0000223	no_significant_change	0.998006	20874	0.9529	10354	3.1101	4470	-3.4962	3297	-3.8067	2753
1219	PA_chr01_G001770	263725	12	beta-galactosidase		Galactose binding lectin domain;Glycosyl hydrolases family 35	OG0015464	no_significant_change	1	5770	1.5564	5292	7.4392	180	6.3703	58	5.8703	240
1220	PA_chr01_G001773	66979	3	N-glycosylase DNA lyase	OGG1	8-oxoguanine DNA glycosylase, N-terminal domain;HhH-GPD superfamily base excision DNA repair protein	OG0008802	no_significant_change		36523	1.0463	9491	1.5115	10470	-2.393	8581	-2.4954	7981
1221	PA_chr01_G001774	5907	1	DYW family of nucleic acid deaminases		DYW family of nucleic acid deaminases;PPR repeat family;PPR repeat	OG0000315	expanded	1	40614	1.3401	6925	-0.3735	18629	2.6702	7118	2.5025	7942
1222	PA_chr01_G001775	4103	1	Pentatricopeptide repeat-containing protein		DYW family of nucleic acid deaminases;PPR repeat family;PPR repeat	OG0026035	no_significant_change		55330	0.4135	15370	-0.3717	18641	2.2792	9203	-1.7212	12116
1223	PA_chr01_G001776	101100	19	beta-galactosidase	BGAL8	Beta-sandwich domain in beta galactosidase;Galactose binding lectin domain;Glycosyl hydrolases family 35	OG0000223	no_significant_change	0.0590169	31196	1.2293	7858	1.5936	10048	2.9912	5487	2.5299	7803
1224	PA_chr01_G001777	673	1							56320	1.0582	9379	0.6207	16660	1.3182	15388	1.2985	14893
1225	PA_chr01_G001779	2734	1	Pentatricopeptide repeat-containing protein		PPR repeat family;PPR repeat	OG0043691	no_significant_change		41346	1.3233	7071	0.507	17579	-2.5213	7895	-2.3245	8801
1226	PA_chr01_G001780	1031	1							7071	1.3233	7071
1227	PA_chr01_G001781	11583	3	Dicarboxylate transporter 1		Sodium:sulfate symporter transmembrane region	OG0005353	no_significant_change	1	36598	1.1833	8257	1.0834	13022	-2.8566	6152	2.2562	9167
1228	PA_chr01_G001782	227838	11	Protein EI24 homolog		Etoposide-induced protein 2.4 (EI24)	OG0007694	no_significant_change		6830	2.1877	2233	-5.6855	774	4.2691	1295	-3.8941	2528
1229	PA_chr01_G001783	726	1							51472	1.6059	4957	-1.3658	11270	-0.7257	19148	-1.1227	16097
1230	PA_chr01_G001787	619	1							41969	2.038	2715	-1.2184	12112	1.1143	16821	2.0283	10321
1231	PA_chr01_G001788	113358	11	belongs to the protein kinase superfamily		Protein kinase domain	OG0003199	no_significant_change	0.0891433	19004	2.0177	2798	3.0972	4510	-2.2798	9200	3.9075	2496
1232	PA_chr01_G001790	44360	3	E3 ubiquitin-protein ligase that mediates ubiquitination and subsequent proteasomal degradation of target proteins. E3 ubiquitin ligases accept ubiquitin from an E2 ubiquitin- conjugating enzyme in the form of a thioester and then directly transfers the ubiquitin to targeted substrates		Seven in absentia protein family	OG0000575	no_significant_change	1	22464	2.0693	2595	2.5879	6050	2.7674	6611	2.6554	7208
1233	PA_chr01_G001791	243375	5				OG0009197	no_significant_change	1	10795	2.1097	2440	4.2294	2127	3.8486	2173	-3.3992	4055
1234	PA_chr01_G001793	503	1							56177	0.5757	13931	-0.3681	18669	2.0448	10518	1.5709	13059
1235	PA_chr01_G001795	3464	1	Pentatricopeptide repeat-containing protein		DYW family of nucleic acid deaminases;PPR repeat family;PPR repeat	OG0000000	no_significant_change		32181	1.437	6155	3.1126	4459	1.8437	11745	2.1209	9822
1236	PA_chr01_G001796	10982	6	ATP-dependent zinc metalloprotease FTSH, chloroplastic		AAA+ lid domain;Peptidase family M41;ATPase family associated with various cellular activities (AAA)	OG0006562	no_significant_change		37714	1.6375	4750	1.2945	11671	2.2549	9324	1.7446	11969
1237	PA_chr01_G001797	84054	4	Protein of unknown function (DUF632)		Protein of unknown function (DUF630);Protein of unknown function (DUF632)	OG0001666	no_significant_change	1	3415	2.5274	1495	7.6596	142	4.4975	974	4.9709	804
1238	PA_chr01_G001798	783	1							56766	1.9269	3140	1.2128	12154	-0.3177	20668	-0.2232	20804
1239	PA_chr01_G001799	1191	1				OG0004984	no_significant_change	1	8629	1.1419	8629
1240	PA_chr01_G001802	737	1				OG0012479	no_significant_change		47332	1.1568	8496	0.6265	16609	1.623	13215	2.2847	9012
1241	PA_chr01_G001803	13223	3	Type I inositol-1,4,5-trisphosphate 5-phosphatase CVP2		Glycosyl hydrolase family 9	OG0002412	no_significant_change	1	25784	0.7436	12350	1.7122	9483	-4.4698	1014	-3.7412	2937
1242	PA_chr01_G001804	639	1				OG0014649	no_significant_change	0.220815	41318	1.1406	8642	0.3305	18934	-2.4433	8303	-3.0484	5439
1243	PA_chr01_G001806	256267	17	Component of the origin recognition complex (ORC) that binds origins of replication	ORC4	Origin recognition complex (ORC) subunit 4 C-terminus;AAA ATPase domain	OG0008374	no_significant_change		22631	1.4861	5780	2.893	5122	2.8587	6139	3.016	5590
1244	PA_chr01_G001807	605485	30	Belongs to the histidine acid phosphatase family		Diphosphoinositol pentakisphosphate kinase 2 N-terminal domain;Histidine phosphatase superfamily (branch 2)	OG0003445	no_significant_change	1	8086	1.8517	3494	5.3003	998	-3.8102	2271	4.5165	1323
1245	PA_chr01_G001813	975	1	NB-ARC domain		NB-ARC domain	OG0043693	no_significant_change		9856	1.0068	9856
1246	PA_chr01_G001814	541	1	Belongs to the disease resistance NB-LRR family			OG0043693	no_significant_change		71769	0.7702	12096	0.3957	18461	-0.4512	20279	0.1661	20933
1247	PA_chr01_G001815	6743	4	PCO_ADO		PCO_ADO	OG0000682	no_significant_change	5.15538e-12	28636	1.5318	5462	-1.402	11049	-3.4429	3506	-2.3613	8619
1248	PA_chr01_G001816	163659	11	3'-phosphoinositide-dependent protein kinase		PH domain;Protein kinase domain	OG0004294	no_significant_change	1	32436	1.5434	5381	1.5421	10314	2.4757	8128	-2.3623	8613
1249	PA_chr01_G001821	8403	4	domain-containing protein		Domain of unknown function (DUF4187);G-patch domain	OG0006301	no_significant_change	1	44569	1.1593	8474	0.9759	13806	1.473	14294	-2.493	7995
1250	PA_chr01_G001824	109675	8	Belongs to the pyruvate kinase family		Pyruvate kinase, alpha/beta domain;Pyruvate kinase, barrel domain	OG0002274	no_significant_change	1	8505	1.64	4734	4.8639	1340	4.2109	1403	4.7493	1028
1251	PA_chr01_G001825	70473	4	late embryogenesis abundant protein		Seed maturation protein	OG0001626	no_significant_change	1	20058	2.3324	1873	3.4106	3732	-2.7257	6836	-2.5661	7617
1252	PA_chr01_G001826	1389	1				OG0017216	no_significant_change	1	29513	1.7436	4084	3.4106	3732	1.5208	13938	2.5392	7759
1253	PA_chr01_G001827	6493	12	vacuolar amino acid transporter		PQ loop repeat	OG0001571	no_significant_change	1	32164	1.5935	5045	-0.9973	13646	-2.7198	6867	-2.7842	6606
1254	PA_chr01_G001828	6539	3	L-gulonolactone		D-arabinono-1,4-lactone oxidase;FAD binding domain	OG0000569	no_significant_change	1	48170	1.7636	3973	-1.1035	12879	-1.51	14023	-0.9501	17295
1255	PA_chr01_G001830	4790	3	L-gulonolactone		D-arabinono-1,4-lactone oxidase;FAD binding domain	OG0000569	no_significant_change	1	34588	1.4364	6159	1.6098	9963	2.5091	7954	1.9964	10512
1256	PA_chr01_G001831	1878	1				OG0003310	no_significant_change		15233	0.4308	15233
1257	PA_chr01_G001832	1315	1	At4g38062-like			OG0002031	expanded	1	15233	0.4308	15233
1258	PA_chr01_G001833	1059	1				OG0020231	no_significant_change	1	15233	0.4308	15233
1259	PA_chr01_G001835	8853	12	Repeated motif present between transmembrane helices in cystinosin, yeast ERS1p, mannose-P-dolichol utilization defect 1, and other hypothetical proteins.		PQ loop repeat	OG0001571	no_significant_change	0.818705	42008	1.5116	5600	1.7539	9306	-1.5163	13973	-1.5599	13129
1260	PA_chr01_G001837	7116	12	vacuolar amino acid transporter		PQ loop repeat	OG0001571	no_significant_change	1	33609	1.3292	7020	1.5554	10239	-2.8952	5952	-2.0152	10398
1261	PA_chr01_G001838	8083	12	vacuolar amino acid transporter		PQ loop repeat	OG0001571	no_significant_change	1	14540	1.8968	3271	-3.3128	3950	-2.9724	5575	-4.2583	1744
1262	PA_chr01_G001839	7802	12	vacuolar amino acid transporter		PQ loop repeat	OG0001571	no_significant_change	1	47290	1.5988	5008	-1.7159	9463	-1.237	15954	1.0141	16865
1263	PA_chr01_G001840	4556	11	vacuolar amino acid transporter		PQ loop repeat	OG0001571	no_significant_change	1	42245	1.8021	3742	-1.0654	13147	1.5086	14032	-1.8559	11324
1264	PA_chr01_G001841	723	1	Auxin responsive protein		Auxin responsive protein	OG0000015	expanded	1	50116	1.394	6498	0.5346	17363	-1.6248	13203	-1.5716	13052
1265	PA_chr01_G001842	605	1	Subtilisin-like protease		Subtilase family	OG0043696	no_significant_change		5631	1.5077	5631
1266	PA_chr01_G001843	2172	6	Cinnamoyl-CoA reductase		NAD dependent epimerase/dehydratase family	OG0000330	no_significant_change	1	48090	1.3833	6576	0.8909	14459	-1.9295	11203	-1.1575	15852
1267	PA_chr01_G001845	3748	1	NB-ARC domain		Rx N-terminal domain;Leucine rich repeat;NB-ARC domain	OG0000012	no_significant_change	0.617565	37001	1.1003	8995	-2.0076	8231	-1.9123	11309	-2.3926	8466
1268	PA_chr01_G001846	82682	1	ADP binding		Rx N-terminal domain;Leucine rich repeat;NB-ARC domain	OG0000012	no_significant_change	1	22388	2.0099	2825	-3.0252	4715	-2.6192	7376	-2.5961	7472
1269	PA_chr01_G001847	4458	1	disease resistance protein		Rx N-terminal domain;Leucine rich repeat;NB-ARC domain	OG0000012	no_significant_change	0.0666449	58650	0.8863	10992	0.9904	13694	-1.132	16705	-0.9551	17259
1270	PA_chr01_G001848	4777	1	Belongs to the disease resistance NB-LRR family		Rx N-terminal domain;NB-ARC domain	OG0000012	no_significant_change	0.0471956	46778	0.953	10353	1.5359	10349	-2.133	9996	-1.125	16080
1271	PA_chr01_G001849	67539	4	Protein of unknown function (DUF632)		Protein of unknown function (DUF630);Protein of unknown function (DUF632)	OG0001666	no_significant_change	1	25586	1.1978	8125	3.6084	3274	2.6401	7264	2.7169	6923
1272	PA_chr01_G001850	1656	3	DDB1- and CUL4-associated factor homolog			OG0025812	no_significant_change		68901	1.1441	8609	-0.3005	19131	-0.4616	20250	-0.1764	20911
1273	PA_chr01_G001851	1576	2				OG0017213	no_significant_change	1	5135	1.58	5135
1274	PA_chr01_G001852	705	1	Protein translation factor SUI1 homolog			OG0014232	no_significant_change	1	11963	0.7842	11963
1275	PA_chr01_G001853	714	1	Protein translation factor SUI1 homolog			OG0014232	no_significant_change	1	9105	1.0879	9105
1276	PA_chr01_G001854	4111	3	TMV resistance protein		TIR domain;NB-ARC domain	OG0010131	no_significant_change	1	48322	2.1083	2446	-0.8157	15055	-1.2694	15725	1.2681	15096
1277	PA_chr01_G001855	3905	1				OG0014808	no_significant_change	1.66737e-08	48322	2.1083	2446	-0.8157	15055	-1.2694	15725	1.2681	15096
1278	PA_chr01_G001856	3044	2	TIR domain		NB-ARC domain	OG0010131	no_significant_change	1	45351	1.2879	7361	1.4674	10704	1.639	13095	1.4038	14191
1279	PA_chr01_G001857	2277	2	TMV resistance protein N-like		NB-ARC domain	OG0010131	no_significant_change	0.702041	60503	2.0107	2823	0.4535	18011	-0.4494	20286	-0.5921	19383
1280	PA_chr01_G001858	52674	4	Nodulin-like		Nodulin-like	OG0002618	no_significant_change	1	18663	2.3292	1880	3.2362	4137	2.733	6792	-2.9508	5854
1281	PA_chr01_G001859	31453	3	Major Facilitator Superfamily protein		Major Facilitator Superfamily;Nodulin-like	OG0002618	no_significant_change	1	21318	1.9525	3049	3.0459	4654	-2.6289	7330	2.8547	6285
1282	PA_chr01_G001861	138755	7	E3 ubiquitin-protein ligase RNF170-like		Protein of unknown function (DUF1232)	OG0007012	no_significant_change	1	13218	2.018	2796	-2.4408	6558	-4.2391	1346	3.8984	2518
1283	PA_chr01_G001862	810	1	LRR receptor-like serine threonine-protein kinase		Leucine rich repeat;Leucine rich repeat N-terminal domain	OG0000856	no_significant_change	4.56361e-10	11311	0.853	11311
1284	PA_chr01_G001864	5293	4	TMV resistance protein N-like		Leucine rich repeat;TIR domain;NB-ARC domain	OG0002074	no_significant_change	0.00146215	14079	0.5602	14079
1285	PA_chr01_G001866	5670	1							3899	1.776	3899
1286	PA_chr01_G001867	1822	3	Protein of unknown function (DUF674)		Protein of unknown function (DUF674)	OG0000253	no_significant_change	0.00216626	8509	1.1553	8509
1287	PA_chr01_G001894	3050	1	Cytochrome c biogenesis protein CcsA	ccsA	Cytochrome C assembly protein	OG0008566	no_significant_change	1	5005	1.5991	5005
1288	PA_chr01_G001895	4616	1	essential for photochemical activity. FB is the terminal electron acceptor of PSI, donating electrons to ferredoxin. The C-terminus interacts with PsaA B D and helps assemble the protein into the PSI complex. Required for binding of PsaD and PsaE to PSI. PSI is a plastocyanin cytochrome c6- ferredoxin oxidoreductase, converting photonic excitation into a charge separation, which transfers an elec…	psaC	4Fe-4S dicluster domain	OG0014448	no_significant_change	1	5005	1.5991	5005
1289	PA_chr01_G001906	945	1				OG0026037	no_significant_change		69865	0.7736	12062	-0.5355	17356	-0.5236	20028	-0.3539	20419
1290	PA_chr01_G001907	4571	3	TIR domain			OG0003577	no_significant_change	0.00471994	8876	1.1136	8876
1291	PA_chr01_G001908	2877	2	TMV resistance protein N-like		TIR domain;NB-ARC domain	OG0043697	no_significant_change		8876	1.1136	8876
1292	PA_chr01_G002214	2232	9	Repeated motif present between transmembrane helices in cystinosin, yeast ERS1p, mannose-P-dolichol utilization defect 1, and other hypothetical proteins.			OG0001571	no_significant_change	1	8936	1.1068	8936
1293	PA_chr01_G002218	726	1				OG0020232	no_significant_change	1	16957	0	16957
1294	PA_chr01_G002221	6287	12	Repeated motif present between transmembrane helices in cystinosin, yeast ERS1p, mannose-P-dolichol utilization defect 1, and other hypothetical proteins.		PQ loop repeat	OG0001571	no_significant_change	1	25363	1.6421	4718	2.3303	6985	-3.2474	4316	-2.2194	9344
1295	PA_chr01_G002225	6214	12	vacuolar amino acid transporter		PQ loop repeat	OG0001571	no_significant_change	1	50087	1.198	8123	0.8168	15045	-2.1293	10021	-1.0096	16898
1296	PA_chr01_G002257	3616	1	AAA-type ATPase family protein		DNA polymerase III, delta subunit;DNA polymerase III subunits gamma and tau domain III	OG0001540	no_significant_change	1	13005	0.6744	13005
1297	PA_chr01_G002277	1219	3	Inorganic pyrophosphatase		Putative Phosphatase	OG0026038	no_significant_change	0.597217	14944	0.4645	14944
1298	PA_chr01_G002278	491	1	Cytochrome p450			OG0015375	no_significant_change	1	14944	0.4645	14944
1299	PA_chr01_G002280	344	1	DNA-dependent RNA polymerase catalyzes the transcription of DNA into RNA using the four ribonucleoside triphosphates as substrates	RPB2	RNA polymerase Rpb2, domain 2	OG0018493	no_significant_change	1	13671	0.6035	13671
1300	PA_chr01_G002302	2877	3				OG0008034	no_significant_change		33843	1.6582	4607	1.0974	12919	1.691	12763	3.5389	3554
1301	PA_chr01_G002304	758	1	protein homooligomerization		BTB/POZ domain	OG0002716	no_significant_change	0.718113	55436	1.4596	5968	0.2068	19681	1.2118	16136	-1.4812	13651
1302	PA_chr01_G002306	1691	1	BTB/POZ domain		BTB/POZ domain	OG0002716	no_significant_change	1	52206	0.5465	14205	0.9509	13997	2.2216	9512	1.3581	14492
1303	PA_chr01_G002307	1724	6	RING-box protein	RBX1	RING-H2 zinc finger domain	OG0043698	no_significant_change		62963	1.1464	8586	-0.3684	18666	-1.1471	16596	-0.6437	19115
1304	PA_chr01_G002308	1568	6	RING-box protein	RBX1	Anaphase-promoting complex subunit 11 RING-H2 finger;RING-H2 zinc finger domain	OG0043698	no_significant_change		66364	1.6149	4896	-0.1583	19904	0.1633	20958	-0.2966	20606
1305	PA_chr01_G002309	446	1	Pentatricopeptide repeat-containing protein		DYW family of nucleic acid deaminases				15874	0.3497	15874
1306	PA_chr01_G002310	770	1				OG0007616	no_significant_change	1	59822	0.6214	13505	0.3101	19073	1.3856	14914	-1.6842	12330
1307	PA_chr01_G002311	4543	1							41732	1.0184	9744	0.9042	14353	2.3318	8923	2.3409	8712
1308	PA_chr01_G002312	161380	13	CW-type Zinc Finger	HSI2	CW-type Zinc Finger;B3 DNA binding domain	OG0001261	no_significant_change	0.042341	25337	1.3429	6900	3.8927	2709	-2.5557	7716	2.4874	8012
1309	PA_chr01_G002314	14989	4	ABC transporter G family member		ABC-2 type transporter	OG0015093	no_significant_change	0.322521	42077	1.3739	6650	-1.1656	12456	1.6198	13241	-2.1394	9730
1310	PA_chr01_G002316	2448	1	GNS1 SUR4 membrane family protein		GNS1/SUR4 family	OG0001242	no_significant_change	1	47204	1.3879	6542	1.0105	13542	-1.625	13201	1.4421	13919
1311	PA_chr01_G002318	465	1				OG0017218	no_significant_change		56412	0.9374	10501	-1.0631	13163	-1.4752	14280	-0.7631	18468
1312	PA_chr01_G002319	569	1							62581	1.0612	9353	-0.6876	16110	-0.5867	19785	-0.9441	17333
1313	PA_chr01_G002320	29785	8	Serine/threonine phosphatases, family 2C, catalytic domain		Protein phosphatase 2C	OG0001245	no_significant_change	1	44113	1.1301	8731	-0.6577	16353	2.4234	8419	1.9781	10610
1314	PA_chr01_G002321	609	1							72785	0.7197	12579	-0.3828	18559	0.3682	20529	0.0381	21118
1315	PA_chr01_G002322	7372	10	ABC transporter G family member		ABC-2 type transporter;ABC transporter	OG0031781	no_significant_change		44627	1.2072	8043	0.8418	14841	-2.1092	10144	-1.8051	11599
1316	PA_chr01_G002324	34969	6	ABC-2 type transporter		ABC-2 type transporter;ABC transporter				13196	1.5997	5001	5.044	1172	-3.2141	4464	3.8789	2559
1317	PA_chr01_G002325	25887	1	Protein kinase C conserved region 2 (CalB)		C2 domain	OG0014067	no_significant_change		26181	1.158	8487	4.3172	2007	-2.4446	8297	2.6136	7390
1318	PA_chr01_G002326	4777	1				OG0011079	no_significant_change		37261	1.3661	6712	2.7002	5696	1.3377	15254	-2.168	9599
1319	PA_chr01_G002327	2734	8	Beta-carotene isomerase D27	D27	Domain of unknown function (DUF4033)	OG0002741	no_significant_change	1	44548	1.2411	7756	0.6872	16114	-2.0625	10407	-2.0373	10271
1320	PA_chr01_G002328	4195	9	Hydrolyzes acetyl esters in homogalacturonan regions of pectin. In type I primary cell wall, galacturonic acid residues of pectin can be acetylated at the O-2 and O-3 positions. Decreasing the degree of acetylation of pectin gels in vitro alters their physical properties		Pectinacetylesterase	OG0000188	no_significant_change	1	46943	0.6201	13518	1.9562	8451	1.718	12584	-1.6745	12390
1321	PA_chr01_G002329	2966	1	Pentatricopeptide repeat-containing protein		DYW family of nucleic acid deaminases;Pentatricopeptide repeat domain;PPR repeat family;PPR repeat	OG0000000	no_significant_change		44478	1.2082	8034	1.5451	10295	-1.5656	13624	1.653	12525
1322	PA_chr01_G002330	3134	4	Universal stress protein family		Universal stress protein family	OG0002626	no_significant_change	0.438867	51669	0.8728	11121	1.0193	13473	1.5619	13644	1.5144	13431
1323	PA_chr01_G002331	2428	4	Universal stress protein		Universal stress protein family	OG0002626	no_significant_change	1	45018	0.8274	11553	-0.96	13932	-2.2418	9406	-2.0622	10127
1324	PA_chr01_G002335	28979	1	CAX-interacting protein		Zinc knuckle	OG0007025	no_significant_change	0.0695124	32738	1.0095	9831	-2.3544	6890	-2.5654	7664	-2.4189	8353
1325	PA_chr01_G002338	5060	4	negative regulation of Rho guanyl-nucleotide exchange factor activity		TIR domain;NB-ARC domain	OG0015465	no_significant_change	0.487735	13981	0.5704	13981
1326	PA_chr01_G002339	3693	2	GDP-fucose protein O-fucosyltransferase			OG0005587	no_significant_change	1	68795	0.7705	12093	0.8022	15166	-0.3275	20643	0.1859	20893
1327	PA_chr01_G002340	1051	2	glycerophosphodiester phosphodiesterase			OG0043699	no_significant_change		8823	1.1191	8823
1328	PA_chr01_G002341	1099	3				OG0014234	no_significant_change	1	15799	0.3607	15799
1329	PA_chr01_G002342	4252	2	TMV resistance protein N-like		TIR domain;NB-ARC domain	OG0026039	no_significant_change	2.85024e-08	11559	0.8267	11559
1330	PA_chr01_G002343	1479	1			Leucine Rich Repeat	OG0026039	no_significant_change	0.137858	12012	0.7788	12012
1331	PA_chr01_G002344	1691	1	Pfam:UBN2			OG0011148	no_significant_change	1	13521	0.6198	13521
1332	PA_chr01_G002345	3200	3	RESISTANCE protein		TIR domain;NB-ARC domain	OG0026039	no_significant_change	0.282473	53594	1.301	7257	1.0042	13588	1.1289	16727	-1.133	16022
1333	PA_chr01_G002348	9521	1							52631	0.5421	14247	0.474	17845	1.7535	12342	-2.4502	8197
1334	PA_chr01_G002349	14799	1				OG0043700	no_significant_change		74614	0.5305	14352	-0.2477	19470	-0.3433	20593	-0.4127	20199
1335	PA_chr01_G002352	5207	3	TMV resistance protein N-like		TIR domain;NB-ARC domain	OG0015465	no_significant_change	4.64523e-06	39505	0.7235	12544	1.8934	8722	1.9279	11213	2.6948	7026
1336	PA_chr01_G002354	3666	4	negative regulation of Rho guanyl-nucleotide exchange factor activity		TIR domain;NB-ARC domain	OG0015465	no_significant_change	1	12792	0.6973	12792
1337	PA_chr01_G002355	885	1	PIF1-like helicase	PIF1		OG0001246	no_significant_change	1	11638	0.8187	11638
1338	PA_chr01_G002356	3162	1							68037	0.7615	12182	0.4071	18364	-0.5487	19930	0.9082	17561
1339	PA_chr01_G002357	3816	4	TMV resistance protein N-like		TIR domain;NB-ARC domain	OG0026039	no_significant_change	1	9810	1.0117	9810
1340	PA_chr01_G002361	6254	1							73032	0.5411	14257	0.1517	19932	-0.7533	19004	-0.4958	19839
1341	PA_chr01_G002364	2766	4	Boron transporter	BOR4		OG0043701	no_significant_change		14285	0.5379	14285
1342	PA_chr01_G002365	2996	4	TMV resistance protein N-like		TIR domain	OG0015465	no_significant_change	0.752374	74988	0.4919	14698	0.0776	20183	-0.6999	19281	-0.2151	20826
1343	PA_chr01_G002367	6929	1				OG0043702	no_significant_change		14392	0.5263	14392
1344	PA_chr01_G002368	1827	1				OG0043700	no_significant_change		57438	0.561	14071	0.3163	19032	1.4193	14676	2.155	9659
1345	PA_chr01_G002370	3577	1	Pentatricopeptide repeat-containing protein		DYW family of nucleic acid deaminases;PPR repeat family;PPR repeat	OG0000000	no_significant_change		39958	0.7257	12522	-0.753	15562	-2.8552	6158	-2.9817	5716
1346	PA_chr01_G002371	2943	4				OG0010673	no_significant_change		70434	0.8087	11733	0.5212	17466	-0.006	21123	-0.4336	20112
1347	PA_chr01_G002372	220876	16	Disulfide-isomerase	PDIL5-4	Endoplasmic Reticulum-Golgi Intermediate Compartment (ERGIC);Endoplasmic reticulum vesicle transporter;Thioredoxin	OG0007535	no_significant_change		12669	1.6435	4707	5.8858	644	3.3152	4014	3.6167	3304
1348	PA_chr01_G002375	3887	4	TMV resistance protein N-like		TIR domain;NB-ARC domain;Leucine Rich Repeat	OG0017219	no_significant_change	0.00271127	49789	0.7781	12018	1.4706	10681	1.4795	14249	1.6042	12841
1349	PA_chr01_G002376	3741	3	TMV resistance protein N-like		TIR domain;NB-ARC domain	OG0017219	no_significant_change		44254	0.8948	10910	2.0069	8236	-1.6922	12753	1.6805	12355
1350	PA_chr01_G002378	636	1				OG0021923	no_significant_change		13385	0.6339	13385
1351	PA_chr01_G002379	2592	2	60s ribosomal protein		60S ribosomal protein L4 C-terminal domain;Ribosomal protein L4/L1 family				42292	0.499	14639	2.3068	7080	-2.1648	9826	-1.9535	10747
1352	PA_chr01_G002380	715	1							49796	0.499	14639	1.0304	13396	2.1743	9782	1.7427	11979
1353	PA_chr01_G002381	759	1							13516	0.6203	13516
1354	PA_chr01_G002382	931	1	Belongs to the disease resistance NB-LRR family		TIR domain	OG0014235	no_significant_change	1	39864	0.5813	13879	0.9017	14375	-2.9773	5548	-2.906	6062
1355	PA_chr01_G002383	2449	2	TMV resistance protein N-like		NB-ARC domain				29465	0.5813	13879	3.044	4660	-2.9773	5548	3.0626	5378
1356	PA_chr01_G002384	26291	1			Leucine Rich Repeat				37993	0.6387	13342	-2.5737	6102	-2.0501	10484	-2.4766	8065
1357	PA_chr01_G002385	293099	14	Belongs to the glycosyl hydrolase 47 family		Glycosyl hydrolase family 47	OG0004253	no_significant_change	1	9091	1.3326	6993	6.2744	474	-4.3938	1112	5.3135	512
1358	PA_chr01_G002387	3194	6	Cysteine-rich receptor-like protein kinase		Salt stress response/antifungal;Protein kinase domain	OG0000014	expanded		11370	0.8467	11370
1359	PA_chr01_G002388	108279	6	Cysteine-rich receptor-like protein kinase		Salt stress response/antifungal;Protein kinase domain	OG0000014	expanded		11837	0.7973	11837
1360	PA_chr01_G002389	905	1	Belongs to the ATCase OTCase family	OTC	Aspartate/ornithine carbamoyltransferase, Asp/Orn binding domain	OG0007647	no_significant_change	1	13690	0.6015	13690
1361	PA_chr01_G002390	11090	3	TMV resistance protein N-like		TIR domain;NB-ARC domain	OG0012431	no_significant_change		12470	0.731	12470
1362	PA_chr01_G002392	3595	6	Cysteine-rich receptor-like protein kinase		Salt stress response/antifungal;Protein kinase domain	OG0000014	expanded		13520	0.6199	13520
1363	PA_chr01_G002393	533	1				OG0043703	no_significant_change		15189	0.4356	15189
1364	PA_chr01_G002394	3979	4	TMV resistance protein N-like		TIR domain;NB-ARC domain	OG0012431	no_significant_change		36586	1.007	9854	1.5638	10191	1.926	11225	3.0772	5316
1365	PA_chr01_G002395	247784	4	Acyl-coenzyme A thioesterase		Thioesterase superfamily	OG0004392	no_significant_change		8073	2.2059	2185	4.2849	2040	-3.9154	2017	4.2085	1831
1366	PA_chr01_G002399	6680	4	Belongs to the peptidase C1 family		Cathepsin propeptide inhibitor domain (I29);Papain family cysteine protease	OG0001340	no_significant_change	1	46509	1.0796	9184	-0.7497	15595	-2.1616	9839	-1.7567	11891
1367	PA_chr01_G002400	544	1				OG0012701	no_significant_change	1	46858	0.971	10187	0.5829	16970	2.0432	10525	2.2546	9176
1368	PA_chr01_G002402	2441	4				OG0004275	no_significant_change	1	39331	0.8557	11285	2.1884	7518	-2.1766	9768	1.9513	10760
1369	PA_chr01_G002403	2432	2				OG0004275	no_significant_change	1	11662	0.8162	11662
1370	PA_chr01_G002404	2133	3				OG0004275	no_significant_change	1	12540	0.7239	12540
1371	PA_chr01_G002405	2195	2				OG0004275	no_significant_change	1	6419	1.4039	6419
1372	PA_chr01_G002406	2234	2				OG0004275	no_significant_change	1	10123	0.978	10123
1373	PA_chr01_G002407	2233	3				OG0004275	no_significant_change	1	70028	1.0399	9552	-0.2513	19447	0.1447	20991	-0.4511	20038
1374	PA_chr01_G002408	12421	3				OG0004275	no_significant_change	0.0441323	20807	1.3394	6930	-2.7531	5517	3.0124	5393	3.7318	2967
1375	PA_chr01_G002412	2628	2				OG0004275	no_significant_change	1	56237	0.7626	12171	-1.2602	11863	1.202	16205	-1.1365	15998
1376	PA_chr01_G002414	7236	2				OG0004275	no_significant_change	1	46777	1.1208	8809	0.7165	15870	-2.3893	8604	1.5042	13494
1377	PA_chr01_G002415	2375	3				OG0004275	no_significant_change	1	41946	1.3055	7219	1.0327	13376	-2.0919	10244	-1.891	11107
1378	PA_chr01_G002416	1591	1				OG0004275	no_significant_change	1	51530	1.6403	4732	-0.6475	16437	-1.6164	13266	-0.9806	17095
1379	PA_chr01_G002417	1709	1				OG0004275	no_significant_change	1	49995	3.4157	541	-0.6827	16153	1.204	16191	0.9779	17110
1380	PA_chr01_G002418	1938	3				OG0004275	no_significant_change	1	54305	1.7359	4126	0.3465	18828	-1.4766	14269	-0.982	17082
1381	PA_chr01_G002419	436	1				OG0010593	no_significant_change	1	8149	1.1952	8149
1382	PA_chr01_G002420	1847	3				OG0004275	no_significant_change	1	63249	0.5479	14192	-0.8366	14884	-1.1307	16716	-0.9252	17457
1383	PA_chr01_G002421	8316	2				OG0004275	no_significant_change	1	54900	0.5908	13792	-1.1408	12608	1.3036	15496	-1.58	13004
1384	PA_chr01_G002422	2021	3				OG0004275	no_significant_change	1	65827	0.8142	11681	0.7352	15711	-0.7701	18917	-0.5631	19518
1385	PA_chr01_G002423	1048	1				OG0004275	no_significant_change	0.172752	61472	0.6234	13487	-1.1122	12816	-1.0342	17357	-0.8685	17812
1386	PA_chr01_G002424	3209	1	Pentatricopeptide repeat-containing protein		DYW family of nucleic acid deaminases;PPR repeat family;PPR repeat	OG0000000	no_significant_change		51646	1.0451	9503	-0.9905	13693	1.6588	12977	1.2133	15473
1387	PA_chr01_G002426	16748	7	Protein SUPPRESSOR OF FRI			OG0005214	no_significant_change		42398	1.232	7833	-1.5092	10483	1.906	11351	1.6212	12731
1388	PA_chr01_G002427	1920	1	Galactosyl transferase GMA12 MNN10 family protein	x34.3	galactosyl transferase GMA12/MNN10 family	OG0002054	no_significant_change	1	49316	0.9363	10512	-1.2141	12142	-1.863	11629	-1.2782	15033
1389	PA_chr01_G002428	1992	1	Galactomannan galactosyltransferase	x34.3	galactosyl transferase GMA12/MNN10 family	OG0002054	no_significant_change	1	67266	0.6502	13234	-0.6943	16055	0.6079	19695	0.793	18282
1390	PA_chr01_G002429	2831	1	Galactomannan galactosyltransferase	x34.3	galactosyl transferase GMA12/MNN10 family	OG0002054	no_significant_change	1	57473	1.072	9257	1.4237	10946	0.8574	18441	-0.6998	18829
1391	PA_chr01_G002430	744	2				OG0018494	no_significant_change	0.00399555	51890	0.9842	10067	0.7855	15299	-1.8145	11936	-1.3431	14588
1392	PA_chr01_G002431	655	2				OG0018494	no_significant_change	0.010739	66130	1.1232	8789	-0.2495	19458	0.9554	17843	-0.4509	20040
1393	PA_chr01_G002432	5677	4	plasmodesmata callose-binding protein		X8 domain	OG0000150	no_significant_change	1	26524	1.4545	6009	2.0094	8221	-3.0707	5119	-2.6626	7175
1394	PA_chr01_G002433	273971	17	TBC1 domain family member		Rab-GTPase-TBC domain	OG0002843	no_significant_change	1	15520	1.4598	5966	4.613	1612	3.9856	1859	2.9014	6083
1395	PA_chr01_G002438	2876	2	TMV resistance protein N-like		TIR domain;NB-ARC domain	OG0022482	no_significant_change	0.00538386	46188	0.9354	10521	1.2005	12222	-2.1315	10007	1.5131	13438
1396	PA_chr01_G002439	3029	1	TMV resistance protein N-like		NB-ARC domain	OG0020234	no_significant_change	1	45977	1.1398	8649	1.2265	12058	1.7246	12541	1.6216	12729
1397	PA_chr01_G002440	141714	3	UPF0548 protein		Domain of unknown function (DUF1990)	OG0007887	no_significant_change	0.725625	30615	0.8838	11015	3.1687	4308	2.3344	8905	-2.8342	6387
1398	PA_chr01_G002441	4387	4	domain-containing protein		Armadillo/beta-catenin-like repeat;C2 domain	OG0043704	no_significant_change		37073	1.141	8638	2.6946	5717	2.3273	8945	-1.4619	13773
1399	PA_chr01_G002442	4561	4	regulation of multicellular organismal development		Armadillo/beta-catenin-like repeat;C2 domain	OG0043704	no_significant_change		47676	0.7868	11939	1.3339	11453	2.3701	8705	-1.1975	15579
1400	PA_chr01_G002443	12619	3	TPLATE-like						40607	2.7918	1084	1.2786	11760	-1.8652	11617	-1.1159	16146
1401	PA_chr01_G002447	742	1				OG0043705	no_significant_change		13359	0.6367	13359
1402	PA_chr01_G002448	89342	3	Receptor-like protein 12		Leucine rich repeat;Leucine Rich Repeat	OG0001025	no_significant_change		29809	0.6111	13602	2.825	5306	-3.0667	5138	-2.9715	5763
1403	PA_chr01_G002449	933	1	Receptor-like protein 12		Leucine Rich repeat;Leucine Rich Repeat	OG0001025	no_significant_change		15150	0.4401	15150
1404	PA_chr01_G002450	772	1	Leucine Rich Repeat		Leucine rich repeat N-terminal domain;Leucine Rich Repeat	OG0001025	no_significant_change		14666	0.4958	14666
1405	PA_chr01_G002451	1711	1	receptor-like protein 12		Leucine Rich repeat;Leucine Rich Repeat	OG0001025	no_significant_change		49018	0.374	15691	0.8251	14980	-2.3595	8764	-2.1705	9583
1406	PA_chr01_G002452	2590	2	TMV resistance protein N-like		TIR domain;NB-ARC domain	OG0022482	no_significant_change	1	54854	0.6262	13459	0.5662	17118	-1.8758	11544	-1.6209	12733
1407	PA_chr01_G002453	2170	2	TMV resistance protein N-like		TIR domain;NB-ARC domain	OG0022482	no_significant_change	1	14529	0.5109	14529
1408	PA_chr01_G002454	704	1				OG0022482	no_significant_change	1	65054	0.3595	15808	0.2166	19636	1.4958	14125	1.2117	15485
1409	PA_chr01_G002455	734	1	TMV resistance protein N-like		TIR domain	OG0022482	no_significant_change	1	15538	0.3929	15538
1410	PA_chr01_G002456	3243	2	disease resistance protein		TIR domain;NB-ARC domain	OG0018495	no_significant_change	1	57430	1.0567	9394	1.2832	11737	0.6833	19348	1.0018	16951
1411	PA_chr01_G002457	969	1	Germin-like protein subfamily 1 member		Cupin	OG0000022	expanded	1	13425	0.6298	13425
1412	PA_chr01_G002458	492	1	germin-like protein			OG0026041	no_significant_change		13425	0.6298	13425
1413	PA_chr01_G002459	4846	4	TMV resistance protein N-like		BspA type Leucine rich repeat region (6 copies);TIR domain;NB-ARC domain	OG0018495	no_significant_change	5.62317e-11	13191	0.6547	13191
1414	PA_chr01_G002460	5302	4	RESISTANCE protein		Leucine rich repeat;TIR domain;NB-ARC domain	OG0018495	no_significant_change	0.000130098	9900	1.0022	9900
1415	PA_chr01_G002462	4186	4	RESISTANCE protein		Leucine rich repeat;TIR domain;NB-ARC domain	OG0018495	no_significant_change	0.000666592	15026	0.4549	15026
1416	PA_chr01_G002463	1171	1			BspA type Leucine rich repeat region (6 copies);Leucine Rich Repeat				9121	1.0862	9121
1417	PA_chr01_G002464	4806	4	TMV resistance protein N-like		BspA type Leucine rich repeat region (6 copies);TIR domain;NB-ARC domain	OG0018495	no_significant_change	8.67013e-09	15740	0.3678	15740
1418	PA_chr01_G002466	472	1	Belongs to the oxygen-dependent FAD-linked oxidoreductase family			OG0031784	no_significant_change		14971	0.4613	14971
1419	PA_chr01_G002467	5403	4	RESISTANCE protein		BspA type Leucine rich repeat region (6 copies);TIR domain;NB-ARC domain	OG0001848	no_significant_change	7.8535e-09	14485	0.5157	14485
1420	PA_chr01_G002468	4721	3	TMV resistance protein N-like		NB-ARC domain	OG0018495	no_significant_change	6.10623e-16	15136	0.4419	15136
1421	PA_chr01_G002469	18516	4	The pyruvate dehydrogenase complex catalyzes the overall conversion of pyruvate to acetyl-CoA and CO(2)		Dehydrogenase E1 component	OG0005639	no_significant_change	1	21329	0.7729	12069	5.4227	911	-2.8637	6115	4.0104	2234
1422	PA_chr01_G002470	482	1							42697	0.7729	12069	1.4627	10726	2.4281	8384	1.8192	11518
1423	PA_chr01_G002471	1404	1	E3 ubiquitin-protein ligase		Ring finger domain	OG0004890	no_significant_change	1	43068	0.8093	11727	1.24	11983	2.1502	9899	2.1954	9459
1424	PA_chr01_G002472	3618	1	DYW family of nucleic acid deaminases		DYW family of nucleic acid deaminases;PPR repeat family;PPR repeat	OG0043706	no_significant_change		40766	1.1297	8735	1.1185	12769	2.0265	10621	2.3565	8641
1425	PA_chr01_G002473	859	1				OG0016233	no_significant_change	1	10986	0.887	10986
1426	PA_chr01_G002474	566	1				OG0022466	no_significant_change	1	16957	0	16957
1427	PA_chr01_G002475	820	1	Conserved oligomeric Golgi complex subunit 1-like			OG0017220	no_significant_change	1	16957	0	16957
1428	PA_chr01_G002476	6802	7	receptor-like serine threonine-protein kinase At5g57670		Protein kinase domain	OG0000942	no_significant_change	1	33158	0.8979	10882	1.8081	9085	-3.0372	5280	-2.5081	7911
1429	PA_chr01_G002477	327723	17	Belongs to the PI3 PI4-kinase family		Phosphoinositide 3-kinase C2;Phosphoinositide 3-kinase family, accessory domain (PIK domain);Phosphatidylinositol 3- and 4-kinase	OG0006675	no_significant_change	0.523877	28034	0.7043	12725	2.8367	5269	-3.039	5273	3.2056	4767
1430	PA_chr01_G002480	3895	1	Pentatricopeptide repeat-containing protein		PPR repeat family;PPR repeat	OG0012916	no_significant_change	1	50984	0.7768	12031	0.8175	15040	1.787	12115	1.7717	11798
1431	PA_chr01_G002481	80973	11	Kinetochore protein Nuf2		Nuf2 family	OG0005145	no_significant_change		22339	1.0034	9888	3.4054	3746	3.089	5035	3.5051	3670
1432	PA_chr01_G002482	689	1							64363	0.6625	13118	0.1009	20118	1.0455	17285	1.4526	13842
1433	PA_chr01_G002483	141818	1	Double-stranded RNA-binding protein		Double-stranded RNA binding motif	OG0001148	no_significant_change	1	19301	1.1886	8210	3.3006	3978	3.3651	3804	3.6158	3309
1434	PA_chr01_G002484	9284	1				OG0001148	no_significant_change	0.800571	50738	1.0092	9834	0.76	15504	-1.7068	12656	-1.6189	12744
1435	PA_chr01_G002486	6175	2				OG0012378	no_significant_change	0.0046058	50493	0.7636	12161	1.41	11012	2.0731	10337	0.9969	16983
1436	PA_chr01_G002488	750	1	Belongs to the protein kinase superfamily			OG0018496	no_significant_change		67008	0.6683	13063	0.431	18190	1.2765	15678	-0.4421	20077
1437	PA_chr01_G002489	3401	4	Topless-related protein		TIR domain;NB-ARC domain	OG0010131	no_significant_change	0.00362944	71739	0.6428	13302	0.3294	18942	0.8009	18757	0.2472	20738
1438	PA_chr01_G002490	4146	3	TMV resistance protein N-like		TIR domain;NB-ARC domain	OG0010131	no_significant_change	9.79051e-06	69143	0.6051	13656	0.7833	15316	-0.5315	20000	-0.42	20171
1439	PA_chr01_G002491	4205	3	TMV resistance protein N-like		TIR domain;NB-ARC domain	OG0010131	no_significant_change	0.0264714	14349	0.5308	14349
1440	PA_chr01_G002493	905	2				OG0026042	no_significant_change	0.28031	12748	0.702	12748
1441	PA_chr01_G002494	59181	2							25623	1.7773	3893	2.7398	5562	-2.6069	7443	-2.3381	8725
1442	PA_chr01_G002495	1054	1	TMV resistance protein N-like		TIR domain				45985	1.0747	9230	2.1531	7645	-1.3301	15305	-1.4577	13805
1443	PA_chr01_G002496	596	1	RNA recognition motif		RNA recognition motif. (a.k.a. RRM, RBD, or RNP domain)	OG0000742	no_significant_change		3100	1.9385	3100
1444	PA_chr01_G002497	598	1				OG0043707	no_significant_change		15652	0.3789	15652
1445	PA_chr01_G002498	18879	2	Transcription elongation factor		TFIIS helical bundle-like domain;Transcription factor S-II (TFIIS), central domain;Transcription factor S-II (TFIIS)	OG0004132	no_significant_change	1	32766	1.6675	4550	2.24	7334	-1.6081	13323	-2.5776	7559
1446	PA_chr01_G002499	110999	19	MORC family CW-type zinc finger protein		Morc6 ribosomal protein S5 domain 2-like;Histidine kinase-, DNA gyrase B-, and HSP90-like ATPase	OG0000555	no_significant_change	1	13027	1.4748	5857	-2.7875	5412	-4.6299	837	-4.8387	921
1447	PA_chr01_G002501	36261	2	transcription factor		Myb/SANT-like DNA-binding domain	OG0005517	no_significant_change	1	11216	1.64	4734	5.0369	1180	3.762	2415	3.7592	2887
1448	PA_chr01_G002502	214066	12	Histone-lysine N-methyltransferase		AWS domain;SET domain	OG0007074	no_significant_change	1	18266	1.469	5893	2.9264	5013	3.475	3387	3.4237	3973
1449	PA_chr01_G002503	5082	3	TMV resistance protein N-like		BspA type Leucine rich repeat region (6 copies);TIR domain;NB-ARC domain;Leucine Rich Repeat	OG0031785	no_significant_change		48092	0.5197	14452	1.4098	11013	1.8374	11787	-1.9382	10840
1450	PA_chr01_G002504	2608	2	TMV resistance protein N-like		TIR domain;NB-ARC domain	OG0018495	no_significant_change	1	71908	0.8696	11150	0.1374	19984	-0.4019	20433	-0.377	20341
1451	PA_chr01_G002505	509	1							72042	0.8696	11150	0.1374	19984	-0.354	20567	-0.377	20341
1452	PA_chr01_G002506	1391	1	Toll - interleukin 1 - resistance			OG0018497	no_significant_change	0.0337449	12135	0.7663	12135
1453	PA_chr01_G002508	10838	3	RESISTANCE protein		TIR domain;NB-ARC domain	OG0001848	no_significant_change	0.00169769	15506	0.3966	15506
1454	PA_chr01_G002509	1165	2	resistance protein		TIR domain	OG0026043	no_significant_change	1	16957	0	16957
1455	PA_chr01_G002510	596	1				OG0043708	no_significant_change		15887	0.3476	15887
1456	PA_chr01_G002511	3882	3	TMV resistance protein N-like		TIR domain;NB-ARC domain	OG0001848	no_significant_change	1	13975	0.571	13975
1457	PA_chr01_G002512	648	1				OG0043708	no_significant_change		15887	0.3476	15887
1458	PA_chr01_G002513	806	2	resistance protein		TIR domain	OG0026043	no_significant_change	5.55112e-16	15452	0.4031	15452
1459	PA_chr01_G002514	926	2	TMV resistance protein N-like		TIR domain	OG0026043	no_significant_change	1	15497	0.3979	15497
1460	PA_chr01_G002515	46986	5	Glutaredoxin Grx1	TTR1	Glutaredoxin;Chitinase class I	OG0001705	no_significant_change	1.49652e-08	69780	0.7125	12646	0.5372	17343	-0.4701	20223	-0.5538	19568
1461	PA_chr01_G002516	5027	3	TMV resistance protein N		Leucine Rich Repeat	OG0001848	no_significant_change	0.00277279	70473	0.5405	14262	0.2103	19667	-0.9148	18090	-0.765	18454
1462	PA_chr01_G002517	3148	3	TMV resistance protein N-like		TIR domain;NB-ARC domain	OG0001848	no_significant_change	1	70473	0.5405	14262	0.2103	19667	-0.9148	18090	-0.765	18454
1463	PA_chr01_G002518	992	2	resistance protein		TIR domain	OG0026043	no_significant_change	0.335849	73773	0.6081	13628	0.1131	20083	-0.5164	20049	-0.4564	20013
1464	PA_chr01_G002519	110434	4	Glutaredoxin Grx1	TTR1	Glutaredoxin	OG0001705	no_significant_change	1	34040	0.9443	10435	1.7642	9255	2.7588	6665	-2.5531	7685
1465	PA_chr01_G002522	1299	1	Secretory protein		Peptidase of plants and bacteria	OG0000729	no_significant_change	1	50976	1.0356	9592	-1.1434	12589	1.5006	14091	-1.3252	14704
1466	PA_chr01_G002523	987	1	Secretory protein		Peptidase of plants and bacteria	OG0000729	no_significant_change	1	61737	1.0432	9521	0.7228	15821	-0.9572	17832	0.7476	18563
1467	PA_chr01_G002524	826	1	Peptidase of plants and bacteria		Peptidase of plants and bacteria	OG0000729	no_significant_change	1	12666	0.7103	12666
1468	PA_chr01_G002525	941	1	Peptidase of plants and bacteria		Peptidase of plants and bacteria	OG0000729	no_significant_change	1	11256	0.8589	11256
1469	PA_chr01_G002526	1066	1	Plant protein of unknown function (DUF825)		Plant protein of unknown function (DUF825)	OG0011718	no_significant_change		7310	1.2947	7310
1470	PA_chr01_G002530	1057	1	Secretory protein		Peptidase of plants and bacteria	OG0000729	no_significant_change	1	52371	1.0216	9718	0.6684	16263	-1.9607	11000	1.2248	15390
1471	PA_chr01_G002531	1302	1	Secretory protein		Peptidase of plants and bacteria	OG0000729	no_significant_change	1	61563	0.891	10947	-0.5711	17076	-0.9883	17649	-1.1515	15891
1472	PA_chr01_G002532	1579	1	Peptidase of plants and bacteria		Peptidase of plants and bacteria	OG0000729	no_significant_change	1	67719	0.4073	15416	0.653	16391	0.8181	18653	-0.9551	17259
1473	PA_chr01_G002533	1348	1	Secretory protein		Peptidase of plants and bacteria	OG0000729	no_significant_change	1	37952	0.8073	11747	2.5147	6312	-3.3598	3829	1.1271	16064
1474	PA_chr01_G002534	1038	1	Secretory protein		Peptidase of plants and bacteria	OG0000729	no_significant_change	0.0485117	13333	0.6396	13333
1475	PA_chr01_G002535	1305	1	Secretory protein		Peptidase of plants and bacteria	OG0000729	no_significant_change	1	68851	0.5925	13776	0.6882	16105	-0.6422	19548	-0.5842	19422
1476	PA_chr01_G002536	1017	1	Peptidase of plants and bacteria		Peptidase of plants and bacteria	OG0000729	no_significant_change	1	13197	0.6541	13197
1477	PA_chr01_G002537	5453	8	Cysteine-rich receptor-like protein kinase		TIR domain;NB-ARC domain;Protein kinase domain	OG0022483	no_significant_change	0.0540348	12929	0.6828	12929
1478	PA_chr01_G002538	729	1	transposition, RNA-mediated			OG0011941	no_significant_change	1	14787	0.4819	14787
1479	PA_chr01_G002539	5288	7	antiporter activity		TIR domain;Protein kinase domain	OG0022483	no_significant_change	0.000366717	14405	0.5249	14405
1480	PA_chr01_G002540	1126	1	Peptidase of plants and bacteria		Peptidase of plants and bacteria	OG0000729	no_significant_change	0.450507	14664	0.496	14664
1481	PA_chr01_G002541	4928	7	serine threonine-protein kinase		TIR domain;Protein kinase domain	OG0022483	no_significant_change	1	16957	0	16957
1482	PA_chr01_G002542	724	1				OG0031786	no_significant_change		16459	0.2554	16459
1483	PA_chr01_G002543	5431	7	receptor-like protein kinase		TIR domain;Protein kinase domain	OG0022483	no_significant_change	0.934541	34404	0.6217	13503					-0.1824	20901
1484	PA_chr01_G002544	22791	2				OG0002782	no_significant_change	0.00946667	33547	0.9179	10689	2.2838	7163	2.8395	6233	2.1945	9462
1485	PA_chr01_G002545	415735	23	DNA mismatch repair protein	MSH1	MutS domain I;MutS domain V	OG0006417	no_significant_change	1	14038	0.7453	12334	5.2796	1010	5.6398	183	-5.3154	511
1486	PA_chr01_G002551	3071	1							39125	0.8462	11375	-1.1294	12696	-2.305	9060	-2.9208	5994
1487	PA_chr01_G002562	132065	8	Ammonium transporter			OG0007120	no_significant_change		31568	0.9051	10815	-3.1499	4360	2.354	8801	2.5704	7592
1488	PA_chr01_G002564	209147	1							24671	0.6532	13205	3.2905	4003	4.0072	1810	2.9989	5653
1489	PA_chr01_G002573	3345	3	L-gulonolactone		D-arabinono-1,4-lactone oxidase;FAD binding domain	OG0000569	no_significant_change	1	47457	1.0525	9431	1.5922	10058	1.4497	14458	-1.5023	13510
1490	PA_chr01_G002575	707	1				OG0043710	no_significant_change		50647	0.7562	12232	1.4364	10871	1.5114	14012	1.4995	13532
1491	PA_chr01_G002576	1348	1				OG0008394	no_significant_change	1	60959	0.7562	12232	-0.396	18458	2.1294	10020	-0.4011	20249
1492	PA_chr01_G002577	539	1	PIF1-like helicase			OG0001246	no_significant_change	1	15093	0.4472	15093
1493	PA_chr01_G002578	621	1							12676	0.7092	12676
1494	PA_chr01_G002579	1218	1				OG0008394	no_significant_change	1	74070	0.5037	14595	0.479	17802	-0.3083	20694	-0.1438	20979
1495	PA_chr01_G002580	1349	1				OG0043710	no_significant_change		49337	0.6478	13255	-1.2106	12168	-1.5905	13443	-2.0033	10471
1496	PA_chr01_G002581	3912	1	Putative S-adenosyl-L-methionine-dependent methyltransferase		Putative S-adenosyl-L-methionine-dependent methyltransferase	OG0015878	no_significant_change	1	57421	0.7487	12304	0.7015	15996	-1.7116	12623	-1.0659	16498
1497	PA_chr01_G002582	2965	3	L-gulonolactone		D-arabinono-1,4-lactone oxidase;FAD binding domain	OG0000569	no_significant_change	1	43105	0.9574	10312	2.0979	7869	1.5648	13628	1.8611	11296
1498	PA_chr01_G002583	3581	4	L-gulonolactone		D-arabinono-1,4-lactone oxidase;FAD binding domain	OG0000569	no_significant_change	1	54240	0.9388	10488	1.2312	12032	-1.5517	13715	0.8375	18005
1499	PA_chr01_G002584	3969	3	L-gulonolactone		D-arabinono-1,4-lactone oxidase;FAD binding domain	OG0000569	no_significant_change	1	59565	0.9461	10417	0.8759	14576	1.1372	16668	-0.8532	17904
1500	PA_chr01_G002587	13367	9				OG0007057	no_significant_change		23851	1.6249	4836	3.6613	3154	-2.4311	8363	2.5906	7498
1501	PA_chr01_G002588	2718	1	zinc-ribbon		zinc-ribbon;Ring finger domain	OG0011092	no_significant_change	1	51565	4.353	219	-0.3508	18800	1.3285	15316	0.9606	17230
1502	PA_chr01_G002589	82403	8	Signal peptidase complex catalytic subunit		Peptidase S24-like	OG0003015	no_significant_change	1	13484	1.776	3899	4.4123	1869	-3.1413	4790	-3.7454	2926
1503	PA_chr01_G002590	3802	4				OG0014809	no_significant_change	0.00272972	16957	0	16957
1504	PA_chr01_G002591	574	1				OG0003663	no_significant_change	1	16957	0	16957
1505	PA_chr01_G002592	3941	4				OG0014809	no_significant_change	1	15850	0.353	15850
1506	PA_chr01_G002593	3631	3				OG0014809	no_significant_change	1	14515	0.5125	14515
1507	PA_chr01_G002594	4095	1							16957	0	16957
1508	PA_chr01_G002595	1227	1							11628	0.8197	11628
1509	PA_chr01_G002596	3278	3							56926	0.8444	11392	1.1071	12854	1.1885	16304	1.0829	16376
1510	PA_chr01_G002597	1079	1							47197	0.7749	12050	1.4325	10896	2.0909	10252	1.4306	13999
1511	PA_chr01_G002598	241472	6	4-coumarate--CoA ligase-like		AMP-binding enzyme C-terminal domain;AMP-binding enzyme	OG0002635	no_significant_change	1	13870	1.1879	8217	4.4213	1859	-4.1704	1477	-3.9736	2317
1512	PA_chr01_G002599	501	1							10042	0.9869	10042
1513	PA_chr01_G002600	100966	6	4-coumarate--CoA ligase-like		AMP-binding enzyme C-terminal domain;AMP-binding enzyme	OG0002635	no_significant_change	1	33600	0.723	12549	4.4745	1787	-2.0216	10655	2.3634	8609
1514	PA_chr01_G002603	6198	4	Belongs to the iron ascorbate-dependent oxidoreductase family		non-haem dioxygenase in morphine synthesis N-terminal;2OG-Fe(II) oxygenase superfamily	OG0000055	no_significant_change		34967	1.2406	7760	1.8308	8977	-1.9125	11307	2.7169	6923
1515	PA_chr01_G002604	765	2	Belongs to the iron ascorbate-dependent oxidoreductase family		non-haem dioxygenase in morphine synthesis N-terminal	OG0000055	no_significant_change		65857	0.7712	12086	0.4911	17705	-1.0455	17285	-0.7083	18781
1516	PA_chr01_G002605	7380	2	Belongs to the iron ascorbate-dependent oxidoreductase family		non-haem dioxygenase in morphine synthesis N-terminal	OG0000055	no_significant_change		56705	0.9648	10243	1.1073	12852	1.2278	16019	0.9042	17591
1517	PA_chr01_G002606	133946	2	Belongs to the iron ascorbate-dependent oxidoreductase family		2OG-Fe(II) oxygenase superfamily	OG0000055	no_significant_change		21898	1.908	3225	3.0699	4588	-3.0139	5382	-2.343	8703
1518	PA_chr01_G002609	24355	6	4-coumarate--CoA ligase-like		AMP-binding enzyme C-terminal domain;AMP-binding enzyme	OG0002635	no_significant_change	1	2760	2.0256	2760
1519	PA_chr01_G002610	26415	6	4-coumarate--CoA ligase-like		AMP-binding enzyme C-terminal domain;AMP-binding enzyme	OG0002635	no_significant_change	1	16957	0	16957
1520	PA_chr01_G002611	23994	6	4-coumarate--CoA ligase-like		AMP-binding enzyme C-terminal domain;AMP-binding enzyme	OG0002635	no_significant_change	1	16957	0	16957
1521	PA_chr01_G002612	24282	6	4-coumarate--CoA ligase-like		AMP-binding enzyme C-terminal domain;AMP-binding enzyme	OG0002635	no_significant_change	1	5297	1.5553	5297
1522	PA_chr01_G002613	10573	5	AMP-binding enzyme C-terminal domain		AMP-binding enzyme C-terminal domain;AMP-binding enzyme	OG0004955	no_significant_change	1	9654	1.0288	9654
1523	PA_chr01_G002614	892	1							10889	0.8972	10889
1524	PA_chr01_G002615	161839	3	Conserved region of unknown function on GLTSCR protein		Conserved region of unknown function on GLTSCR protein	OG0006190	no_significant_change	1	26371	1.2728	7483	2.9964	4794	-2.6701	7119	-2.706	6975
1525	PA_chr01_G002620	1883	4	Belongs to the iron ascorbate-dependent oxidoreductase family		non-haem dioxygenase in morphine synthesis N-terminal;2OG-Fe(II) oxygenase superfamily	OG0000055	no_significant_change		41208	0.7561	12233	2.3157	7046	-2.2318	9459	-1.6616	12470
1526	PA_chr01_G002621	1627	4	Belongs to the iron ascorbate-dependent oxidoreductase family		non-haem dioxygenase in morphine synthesis N-terminal;2OG-Fe(II) oxygenase superfamily	OG0000055	no_significant_change		33252	1.1518	8539	2.4234	6620	2.2597	9297	2.3253	8796
1527	PA_chr01_G002623	2005	1	receptor-like protein kinase		Protein kinase domain	OG0029532	no_significant_change		67242	0.978	10123	0.4696	17884	-0.7809	18858	0.3672	20377
1528	PA_chr01_G002624	2381	1	receptor-like protein kinase		SPARK;Protein kinase domain	OG0000426	expanded	1	70687	0.4649	14940	0.4695	17885	-0.6218	19637	0.8027	18225
1529	PA_chr01_G002625	3099	4	Belongs to the iron ascorbate-dependent oxidoreductase family		non-haem dioxygenase in morphine synthesis N-terminal;2OG-Fe(II) oxygenase superfamily	OG0000055	no_significant_change		38176	2.7411	1153	2.218	7401	-1.1601	16497	-1.5603	13125
1530	PA_chr01_G002627	87324	4	Phosphatidylglycerol phosphatidylinositol transfer						9510	1.7623	3980	5.1226	1119	-4.0681	1684	3.8151	2727
1531	PA_chr01_G002630	5602	1				OG0020217	no_significant_change	1	14980	0.4604	14980
1532	PA_chr01_G002631	20142	5	Protein sel-1 homolog			OG0004457	no_significant_change	1	14799	0.4807	14799
1533	PA_chr01_G002632	423	1							14799	0.4807	14799
1534	PA_chr01_G002634	2256	4	Belongs to the iron ascorbate-dependent oxidoreductase family		non-haem dioxygenase in morphine synthesis N-terminal;2OG-Fe(II) oxygenase superfamily	OG0000055	no_significant_change		45124	1.5431	5384	-1.035	13363	-1.681	12825	1.4968	13552
1535	PA_chr01_G002635	3178	3	gag-polypeptide of LTR copia-type		gag-polypeptide of LTR copia-type	OG0001654	expanded	1	22251	1.9687	2980	-1.9448	8498	-2.9701	5584	-3.1035	5189
1536	PA_chr01_G002636	2815	4	Protein phosphatase 2C		Protein phosphatase 2C				34438	1.939	3096	-2.3392	6950	-1.9805	10892	1.5034	13500
1537	PA_chr01_G002637	4967	2	Kinase-like protein TMKL1		Protein tyrosine and serine/threonine kinase	OG0002070	no_significant_change	1	33037	2.733	1164	0.7754	15383	3.2193	4442	1.7316	12048
1538	PA_chr01_G002638	429	1				OG0010769	no_significant_change	1	6403	1.4062	6403
1539	PA_chr01_G002639	3709	1	CSC1-like protein At4g35870		Cytosolic domain of 10TM putative phosphate transporter;Late exocytosis, associated with Golgi transport;Calcium-dependent channel, 7TM region, putative phosphate	OG0007893	no_significant_change		30345	2.9913	856	-1.1736	12401	-2.3884	8609	-2.39	8479
1540	PA_chr01_G002641	3205	2	Subtilisin-like protease		Fibronectin type-III domain;Peptidase inhibitor I9;PA domain;Subtilase family	OG0010461	no_significant_change		32356	1.2457	7714	1.9365	8535	2.4764	8121	2.4945	7986
1541	PA_chr01_G002642	141727	3	Protein of unknown function (DUF1639)		Protein of unknown function (DUF1639)	OG0001154	no_significant_change	5.7515e-08	19244	1.2223	7915	3.073	4578	-3.7216	2554	-3.3582	4197
1542	PA_chr01_G002646	987	2				OG0018498	no_significant_change	1	11475	0.8354	11475
1543	PA_chr01_G002650	5289	2	Folate-Biopterin Transporter		BT1 family	OG0002373	no_significant_change	1	38675	1.6071	4949	1.3557	11335	-1.7963	12053	2.0252	10338
1544	PA_chr01_G002651	1672	2				OG0013351	no_significant_change		44535	1.6273	4819	-0.8353	14895	-1.8628	11631	-1.5506	13190
1545	PA_chr01_G002652	339962	10	Hydrolyzes glycerol-phospholipids at the terminal phosphodiesteric bond		PLD-like domain;Phospholipase D C terminal;Phospholipase D Active site motif;C2 domain	OG0000617	no_significant_change	1	1150	2.9095	941	9.0641	40	-6.2287	79	-6.5701	90
1546	PA_chr01_G002658	5917	1			PPR repeat family;PPR repeat	OG0000647	expanded		46870	1.6686	4544	-1.4878	10595	-1.1231	16763	1.2878	14968
1547	PA_chr01_G002661	4454	1	Pentatricopeptide repeat-containing protein		DYW family of nucleic acid deaminases;PPR repeat family;PPR repeat	OG0021723	no_significant_change		45607	2.5132	1517	-1.0808	13041	-1.5165	13971	-0.9827	17078
1548	PA_chr01_G002662	7283	5	Protein ALWAYS EARLY			OG0001795	no_significant_change	8.81073e-08	61252	0.49	14714	0.4177	18285	-0.7898	18812	-2.1986	9441
1549	PA_chr01_G002664	546	1							60784	1.0278	9664	-1.0873	12993	0.7078	19238	-0.6875	18889
1550	PA_chr01_G002667	188091	12	DNA polymerase		3'-5' exonuclease;DNA polymerase family A	OG0004085	no_significant_change	0.00053814	19327	1.1071	8933	-2.3224	7024	-4.307	1230	-4.0507	2140
1551	PA_chr01_G002668	419	1							43150	0.9814	10092	1.1805	12350	0.3018	20708
1552	PA_chr01_G002672	20932	1	AAA-type ATPase family protein		DNA polymerase III, delta subunit;DNA polymerase III subunits gamma and tau domain III	OG0001540	no_significant_change	1	8786	1.1235	8786
1553	PA_chr01_G002673	1595	1	AAA-type ATPase family protein		DNA polymerase III, delta subunit;DNA polymerase III subunits gamma and tau domain III	OG0001540	no_significant_change	1	16714	0.1977	16714
1554	PA_chr01_G002675	12137	1							29031	1.4368	6156	-1.1181	12772	-3.923	2001	2.469	8102
1555	PA_chr01_G002676	4458	1	Pentatricopeptide repeat-containing protein		DYW family of nucleic acid deaminases;Pentatricopeptide repeat domain;PPR repeat family;PPR repeat	OG0000000	no_significant_change		37995	1.3135	7151	-0.5903	16908	2.8667	6097	2.5228	7839
1556	PA_chr01_G002680	3721	3	TMV resistance protein N-like		NB-ARC domain	OG0000157	no_significant_change		52364	0.5012	14618	1.2671	11824	-1.8135	11943	-1.4329	13979
1557	PA_chr01_G002681	455	1				OG0018106	no_significant_change	1	58348	1.0244	9695	-0.419	18276	-1.3606	15094	-1.2411	15283
1558	PA_chr01_G002682	3376	3	TMV resistance protein N-like			OG0022484	no_significant_change	5.50695e-05	10596	0.9274	10596
1559	PA_chr01_G002683	174295	9	DNA-binding domain in plant proteins such as APETALA2 and EREBPs		Potential DNA-binding domain;B3 DNA binding domain;AP2 domain	OG0013272	no_significant_change	0.0779545	34448	1.3505	6842	-1.9631	8417	-2.1191	10076	2.2653	9113
1560	PA_chr01_G002684	300322	9	TOM1-like protein		GAT domain;VHS domain	OG0000965	no_significant_change	1	11175	2.83	1033	3.8521	2789	-3.8596	2141	3.0998	5212
1561	PA_chr01_G002687	557	1	Reverse transcriptase (RNA-dependent DNA polymerase)			OG0007852	no_significant_change	1	65863	0.39	15562	0.9258	14187	-0.471	20217	1.1508	15897
1562	PA_chr01_G002689	7147	1							36320	0.948	10398	1.5523	10254	-2.7262	6835	-2.3192	8833
1563	PA_chr01_G002690	6989	1				OG0043713	no_significant_change		38836	1.2857	7380	-1.4056	11031	2.3166	9011	1.8397	11414
1564	PA_chr01_G002691	2268	1				OG0020236	no_significant_change	1	52715	0.4787	14817	0.9482	14019	1.6502	13031	-1.9369	10848
1565	PA_chr01_G002692	2538	1	Ribosomal L28e protein family		Ribosomal L28e protein family	OG0003859	no_significant_change	0.0147651	49601	0.7097	12671	1.0932	12952	2.1093	10143	1.4536	13835
1566	PA_chr01_G002693	6093	7	disease resistance protein		NB-ARC domain;Leucine Rich Repeat	OG0000258	no_significant_change		45517	0.6556	13182	-1.1404	12612	2.4407	8319	1.841	11404
1567	PA_chr01_G002694	2279	1	E3 ubiquitin-protein ligase			OG0009279	no_significant_change	0.0312317	54120	0.7604	12192	1.5234	10417	-1.3075	15465	-1.1298	16046
1568	PA_chr01_G002695	732	1	Belongs to the CRISP family			OG0022485	no_significant_change	1	11368	0.8469	11368
1569	PA_chr01_G002697	1698	1	F-box only protein			OG0043714	no_significant_change		35887	1.0189	9739	-2.1897	7513	-2.0211	10659	-2.4961	7976
1570	PA_chr01_G002698	1668	1	F-box kelch-repeat protein			OG0043714	no_significant_change		64476	0.6335	13389	-0.8462	14805	1.1612	16487	0.505	19795
1571	PA_chr01_G002699	6043	2							36226	1.8084	3705	1.4093	11015	-2.2809	9192	1.6867	12314
1572	PA_chr01_G002700	11632	3				OG0039148	no_significant_change		27369	0.6074	13634	1.6777	9644	-3.7516	2454	-4.3246	1637
1573	PA_chr01_G002702	876	1	Reverse transcriptase-like		Reverse transcriptase-like	OG0003738	no_significant_change	1	37864	0.7357	12425	0.2315	19563	-3.2228	4425	-4.4339	1451
1574	PA_chr01_G002703	30986	10	thiamine biosynthetic bifunctional enzyme		Phosphomethylpyrimidine kinase;Thiamine monophosphate synthase	OG0008774	no_significant_change		34809	1.695	4377	-1.311	11576	1.8508	11700	2.6656	7156
1575	PA_chr01_G002704	233836	13	Zinc finger CCCH domain-containing protein 28		RNA-binding, Nab2-type zinc finger;Zinc finger C-x8-C-x5-C-x3-H type (and similar)	OG0016918	no_significant_change		19301	1.075	9227	3.998	2529	3.1571	4716	-3.7786	2829
1576	PA_chr01_G002705	3535	1				OG0001946	no_significant_change	1	45896	0.6397	13332	-0.9921	13683	1.9018	11380	-2.5902	7501
1577	PA_chr01_G002706	60275	16	Pyruvate kinase		Pyruvate kinase, alpha/beta domain;Pyruvate kinase, barrel domain	OG0001929	no_significant_change	1	29921	1.1786	8301	1.6206	9908	2.478	8115	-3.5279	3597
1578	PA_chr01_G002707	36540	7	TENA/THI-4/PQQC family		TENA/THI-4/PQQC family	OG0005244	no_significant_change		22063	1.2624	7574	3.743	3001	2.9768	5550	2.9325	5938
1579	PA_chr01_G002709	693	1							45581	0.7586	12210	1.8426	8927	1.3641	15070	2.2139	9374
1580	PA_chr01_G002710	374136	12	Rad17 cell cycle checkpoint protein		Rad17 P-loop domain	OG0008518	no_significant_change	0.5	7268	1.4742	5860	6.5684	380	4.7438	723	5.7092	305
1581	PA_chr01_G002711	2210	1	receptor-like protein kinase		SPARK;Protein kinase domain	OG0000426	expanded	3.43966e-07	13061	0.6685	13061
1582	PA_chr01_G002712	1777	1	receptor-like protein kinase		Protein kinase domain	OG0000426	expanded	1	12762	0.7006	12762
1583	PA_chr01_G002713	798	1	receptor-like protein kinase		Protein kinase domain	OG0000426	expanded	1	10735	0.9133	10735
1584	PA_chr01_G002714	2417	1	receptor-like protein kinase		SPARK;Protein kinase domain	OG0000426	expanded	1	71619	0.5156	14486	0.3177	19023	-0.7171	19191	-0.6816	18919
1585	PA_chr01_G002715	1223	1	receptor-like protein kinase		SPARK	OG0000426	expanded	0.925055	59899	0.6576	13164	0.702	15991	1.0827	17035	1.472	13709
1586	PA_chr01_G002717	614	2	Formate--tetrahydrofolate	THFS	Formate--tetrahydrofolate ligase				14768	0.484	14768
1587	PA_chr01_G002718	8234	4	TMV resistance protein N-like		NB-ARC domain;Leucine Rich Repeat	OG0005523	no_significant_change	3.21506e-08	39662	0.6327	13397	2.818	5328	2.2128	9561	1.8456	11376
1588	PA_chr01_G002719	2182	3	Pectinesterase		Pectinesterase	OG0009695	no_significant_change	1	41056	0.6327	13397	2.3941	6722	2.2128	9561	1.8456	11376
1589	PA_chr01_G002720	1231	1	Pentatricopeptide repeat-containing protein		PPR repeat family;PPR repeat				56447	0.6505	13232	0.3215	18995	1.6962	12727	1.8252	11493
1590	PA_chr01_G002721	1130	1	Pentatricopeptide repeat-containing protein		PPR repeat				51309	1.0294	9650	0.5863	16942	1.9238	11239	1.5068	13478
1591	PA_chr01_G002722	601	1							56451	1.0294	9650	0.4404	18115	1.5847	13484	1.2535	15202
1592	PA_chr01_G002723	642	1							53132	1.0294	9650	0.2008	19711	1.7594	12302	1.8293	11469
1593	PA_chr01_G002724	2697	1	receptor-like protein kinase		SPARK;Protein kinase domain	OG0000426	expanded	0.0113141	10877	0.8985	10877
1594	PA_chr01_G002725	2035	1	receptor-like protein kinase		Protein kinase domain	OG0000426	expanded	1	14475	0.517	14475
1595	PA_chr01_G002726	2022	1	receptor-like protein kinase		SPARK;Protein kinase domain	OG0000426	expanded	1	6883	1.3452	6883
1596	PA_chr01_G002727	2504	1	receptor-like protein kinase		SPARK;Protein kinase domain	OG0000426	expanded	0.335997	60885	0.676	12994	0.8552	14733	1.0558	17217	1.1446	15941
1597	PA_chr01_G002728	2645	2	receptor-like protein kinase		SPARK;Protein kinase domain	OG0000426	expanded	0.657252	51888	0.6371	13355	1.2012	12218	1.3654	15060	1.8686	11255
1598	PA_chr01_G002729	3040	1	receptor-like protein kinase		SPARK;Protein kinase domain	OG0000426	expanded	1	49366	1.6132	4908	1.0586	13195	1.4189	14677	-1.054	16586
1599	PA_chr01_G002731	2487	2	Belongs to the cytochrome P450 family		Cytochrome P450	OG0005181	no_significant_change	1	68607	1.0443	9511	-0.1731	19848	-0.292	20730	0.7554	18518
1600	PA_chr01_G002732	2178	1				OG0011505	no_significant_change	1	45804	1.2126	7996	2.4385	6566	-0.8628	18404	-1.6046	12838
1601	PA_chr01_G002733	2474	1	receptor-like protein kinase		Protein kinase domain	OG0000426	expanded	1.33625e-10	45804	1.2126	7996	2.4385	6566	-0.8628	18404	-1.6046	12838
1602	PA_chr01_G002735	2432	2	Belongs to the cytochrome P450 family		Cytochrome P450	OG0005181	no_significant_change	0.368911	7236	1.3035	7236
1603	PA_chr01_G002736	4758	1	Splicing factor 3B subunit		Splicing factor 3B subunit 1	OG0001659	no_significant_change		60323	0.5949	13752	0.6092	16743	-1.7319	12493	-0.9439	17335
1604	PA_chr01_G002738	7382	1							38361	0.7562	12232	1.8604	8851	-2.3343	8906	-2.4146	8372
1605	PA_chr01_G002739	466	1	Ras-related protein		Ras family	OG0014720	no_significant_change		56004	1.4525	6025	0.8112	15092	-1.2143	16118	0.7106	18769
1606	PA_chr01_G002740	130909	9	peroxidase		Peroxidase	OG0000991	no_significant_change	1	15868	1.4551	6003	3.0927	4525	-3.5382	3148	-4.0267	2192
1607	PA_chr01_G002742	140817	7	Amino-acid permease		Amino acid permease	OG0005923	no_significant_change	1	23745	1.3018	7249	-3.0254	4713	-3.0771	5087	2.7647	6696
1608	PA_chr01_G002744	36568	4				OG0004543	no_significant_change	0.00259855	42131	0.7275	12505	-1.9961	8278	-1.9472	11088	-2.0397	10260
1609	PA_chr01_G002745	92641	7	Amino-acid permease		Amino acid permease	OG0005923	no_significant_change	0.145371	22753	1.6016	4986	-2.3801	6782	2.9089	5876	-3.1218	5109
1610	PA_chr01_G002746	470	2	gag-polypeptide of LTR copia-type			OG0001654	expanded	1	11923	0.7884	11923
1611	PA_chr01_G002747	861	1	TMV resistance protein N-like		TIR domain	OG0020115	no_significant_change	0.569839	62334	0.7673	12125	-1.2247	12067	-0.892	18223	-0.4775	19919
1612	PA_chr01_G002748	1154	1	TMV resistance protein N-like		NB-ARC domain	OG0026046	no_significant_change		61661	0.7568	12226	-1.1413	12606	-0.9134	18098	0.7178	18731
1613	PA_chr01_G002751	5038	5	Amino-acid permease		zinc-binding in reverse transcriptase;Amino acid permease			0	58759	0.7043	12725	-0.5778	17017	-1.5624	13641	-1.2278	15376
1614	PA_chr01_G002752	357573	11	ultraviolet-B receptor UVR8	UVR8	Regulator of chromosome condensation (RCC1) repeat	OG0007764	no_significant_change		25502	1.1518	8539	-2.7156	5645	-3.0375	5279	-2.9101	6039
1615	PA_chr01_G002756	188882	1	DYW family of nucleic acid deaminases		DYW family of nucleic acid deaminases;PPR repeat family;PPR repeat	OG0024759	no_significant_change		16918	1.4874	5769	3.7445	2996	-3.4123	3626	-3.2681	4527
1616	PA_chr01_G002758	1716	3	Myb-related protein	MYB4	Myb-like DNA-binding domain	OG0000001	no_significant_change		46744	2.1414	2348	-0.7092	15930	-1.3093	15452	-1.5785	13014
1617	PA_chr01_G002759	1512	3	transcription regulator recruiting activity		Myb-like DNA-binding domain	OG0000001	no_significant_change		11558	0.8268	11558
1618	PA_chr01_G002760	955	2	transcription		Myb-like DNA-binding domain	OG0020237	no_significant_change	1	7486	1.2725	7486
1619	PA_chr01_G002761	721	1				OG0000001	no_significant_change		56927	1.0004	9918	-0.5177	17493	-2.1248	10045	-0.573	19471
1620	PA_chr01_G002762	1599	3	transcription regulator recruiting activity		Myb-like DNA-binding domain	OG0000001	no_significant_change		72514	0.9692	10203	0.0717	20193	-0.0751	21065	-0.1002	21053
1621	PA_chr01_G002763	28243	11	synthase		Terpene synthase family, metal binding domain;Terpene synthase, N-terminal domain	OG0000184	no_significant_change	1	17265	1.0634	9331	3.5132	3486	-3.7622	2414	4.0996	2034
1622	PA_chr01_G002764	24854	2	synthase		Terpene synthase family, metal binding domain	OG0000004	no_significant_change		17265	1.0634	9331	3.5132	3486	-3.7622	2414	4.0996	2034
1623	PA_chr01_G002765	782	1	synthase		Terpene synthase family 2, C-terminal metal binding	OG0000004	no_significant_change		56285	1.0634	9331	1.1424	12598	-1.3909	14875	-0.5715	19481
1624	PA_chr01_G002766	1956	3	Myb-related protein	MYB4	Myb-like DNA-binding domain	OG0000001	no_significant_change		36988	2.3851	1762	1.1309	12686	-2.5383	7800	1.3207	14740
1625	PA_chr01_G002769	2070	3	Myb-related protein	MYB4	Myb-like DNA-binding domain	OG0000001	no_significant_change		56246	1.3714	6671	-1.0228	13445	-1.097	16942	-0.6311	19188
1626	PA_chr01_G002774	620	2				OG0024868	no_significant_change		46088	2.022	2776	-0.9342	14125	1.5655	13625	-1.2	15562
1627	PA_chr01_G002777	1668	2	Myb-like DNA-binding domain		Myb-like DNA-binding domain	OG0020238	no_significant_change		56403	1.2768	7451	-0.4692	17888	-1.3138	15419	-1.1879	15645
1628	PA_chr01_G002778	1666	3	Myb-related protein	MYB4	Myb-like DNA-binding domain	OG0000001	no_significant_change		47808	2.0951	2495	-1.0788	13054	1.4154	14701	-0.909	17558
1629	PA_chr01_G002779	1815	3	transcription		Myb-like DNA-binding domain	OG0000001	no_significant_change		52645	2.1136	2426	-1.2155	12131	-0.8506	18477	-0.5445	19611
1630	PA_chr01_G002780	1472	2	transcription regulator recruiting activity		Myb-like DNA-binding domain	OG0000001	no_significant_change		45811	1.7719	3919	-0.7206	15838	-1.6683	12909	-1.5576	13145
1631	PA_chr01_G002782	1374	3	transcription		Myb-like DNA-binding domain	OG0000001	no_significant_change		59616	0.8583	11261	-1.0852	13011	-0.9376	17956	-0.9355	17388
1632	PA_chr01_G002783	1602	3	Myb-related protein	MYB4	Myb-like DNA-binding domain	OG0000001	no_significant_change		50859	1.4934	5725	0.5453	17283	2.0702	10352	-0.9179	17499
1633	PA_chr01_G002784	1686	3	transcription regulator recruiting activity		Myb-like DNA-binding domain	OG0000001	no_significant_change		51390	1.2827	7403	-0.74	15669	-2.3144	9021	-0.6085	19297
1634	PA_chr01_G002785	765	2	Belongs to the cation transport ATPase (P-type) (TC 3.A.3) family		E1-E2 ATPase	OG0018499	no_significant_change	1	16503	0.2457	16503
1635	PA_chr01_G002786	1432	3	Myb-related protein		Myb-like DNA-binding domain	OG0000001	no_significant_change		53735	2.2801	1998	-0.4906	17710	-1.317	15397	-0.7375	18630
1636	PA_chr01_G002787	4203	2	belongs to the protein kinase superfamily			OG0026047	no_significant_change	0.000325914	35797	1.5456	5368	-3.6851	3104	-1.9022	11378	-1.1439	15947
1637	PA_chr01_G002790	3976	1	Pentatricopeptide repeat-containing protein		DYW family of nucleic acid deaminases;Pentatricopeptide repeat domain;PPR repeat family;PPR repeat	OG0000000	no_significant_change		46577	1.222	7918	-0.6121	16719	1.5943	13416	2.3817	8524
1638	PA_chr01_G002792	6034	4	Tetratricopeptide repeat		Tetratricopeptide repeat	OG0000543	no_significant_change	1	52473	1.1315	8718	-0.7015	15996	-1.4641	14354	1.5181	13405
1639	PA_chr01_G002795	14708	8	domain-containing protein		Armadillo/beta-catenin-like repeat;C2 domain	OG0002114	no_significant_change	1	50928	1.0676	9294	0.8826	14526	-1.9638	10985	1.1188	16123
1640	PA_chr01_G002796	682	1				OG0018500	no_significant_change	1	16957	0	16957
1641	PA_chr01_G002797	640	1				OG0018500	no_significant_change	1	12343	0.7443	12343
1642	PA_chr01_G002798	640	1				OG0018500	no_significant_change	1	16957	0	16957
1643	PA_chr01_G002808	342897	24	Belongs to the TRAFAC class myosin-kinesin ATPase superfamily. Kinesin family		MyTH4 domain;FERM central domain;Kinesin motor domain	OG0003503	no_significant_change	1	20202	1.9723	2963	-1.6767	9650	-2.9127	5853	-4.2619	1736
1644	PA_chr01_G002810	244788	10	cleavage stimulation factor		Hinge domain of cleavage stimulation factor subunit 2;RNA recognition motif. (a.k.a. RRM, RBD, or RNP domain)	OG0009334	no_significant_change	1	14937	1.5525	5320	3.2883	4010	-3.5216	3204	3.9416	2403
1645	PA_chr01_G002812	83437	1				OG0026049	no_significant_change	0.119395	23655	1.3304	7010	2.3947	6718	-3.2314	4393	-3.0281	5534
1646	PA_chr01_G002813	7545	3	BONZAI 1-like		Development and cell death domain	OG0014649	no_significant_change	1	55040	1.0403	9548	-1.075	13082	-1.3514	15151	-0.9551	17259
1647	PA_chr01_G002814	23349	11	ABC transporter B family member		ABC transporter transmembrane region;ABC transporter	OG0001328	no_significant_change	1	31115	1.1998	8108	3.272	4057	2.648	7224	1.7832	11726
1648	PA_chr01_G002816	839	1							56692	0.3149	16098	1.0869	12997	2.3331	8913	0.7282	18684
1649	PA_chr01_G002818	4231	4	positive regulation of cell-substrate adhesion		TIR domain;NB-ARC domain;Leucine Rich Repeat	OG0031787	no_significant_change		45184	0.7057	12711	0.746	15627	-2.5342	7822	-2.2823	9024
1650	PA_chr01_G002819	4785	3	TMV resistance protein N-like		BspA type Leucine rich repeat region (6 copies)	OG0014803	no_significant_change	6.21692e-07	28129	3.3473	580	2.3411	6940	-1.7922	12079	-2.3807	8530
1651	PA_chr01_G002822	584	1				OG0020239	no_significant_change	1	14990	0.4594	14990
1652	PA_chr01_G002823	3416	7	Cysteine-rich receptor-like protein kinase		Salt stress response/antifungal;Protein kinase domain	OG0000063	no_significant_change		52889	0.7607	12189	0.6982	16023	-1.6583	12982	-1.7904	11695
1653	PA_chr01_G002824	3043	5	Cysteine-rich receptor-like protein kinase		Salt stress response/antifungal;Protein kinase domain	OG0000063	no_significant_change		40892	0.6671	13075	2.638	5895	1.9129	11305	1.9768	10617
1654	PA_chr01_G002825	3250	4	TMV resistance protein N-like		TIR domain;NB-ARC domain	OG0013003	no_significant_change	0.120556	51976	0.9875	10037	0.877	14568	-1.687	12788	-1.3439	14583
1655	PA_chr01_G002826	1988	1	Disease resistance protein (TIR-NBS-LRR class)		Leucine Rich Repeat	OG0013764	no_significant_change	1	16957	0	16957
1656	PA_chr01_G002827	1507	2	TMV resistance protein N-like						9154	1.0827	9154
1657	PA_chr01_G002828	2202	1	Disease resistance protein (TIR-NBS-LRR class)		Leucine Rich Repeat	OG0013764	no_significant_change	1	9154	1.0827	9154
1658	PA_chr01_G002829	4724	4	positive regulation of cell-substrate adhesion		TIR domain;NB-ARC domain	OG0031787	no_significant_change		53541	0.7957	11853	1.3508	11363	1.6281	13175	-0.9725	17150
1659	PA_chr01_G002830	6710	1							59579	0.7277	12503	0.7789	15355	1.2375	15949	-1.1696	15772
1660	PA_chr01_G002831	7067	1				OG0017222	no_significant_change	1	7779	1.2381	7779
1661	PA_chr01_G002832	10188	5	Belongs to the cation transport ATPase (P-type) (TC 3.A.3) family. Type IV subfamily			OG0024857	no_significant_change		7779	1.2381	7779
1662	PA_chr01_G002834	791	1				OG0043715	no_significant_change		13193	0.6545	13193
1663	PA_chr01_G002835	19146	1							62333	0.6441	13289	1.1496	12550	-1.0882	16999	0.5676	19495
1664	PA_chr01_G002837	768	1				OG0022467	no_significant_change	1	12750	0.7018	12750
1665	PA_chr01_G002838	1041	2	ATP-citrate synthase beta chain protein	ACLB-1		OG0013359	no_significant_change	1	14913	0.4678	14913
1666	PA_chr01_G002840	1458	3	regulation of multicellular organismal development		C2 domain	OG0017908	no_significant_change	1	72418	0.6089	13620	0.2026	19702	-0.5515	19919	-0.6328	19177
1667	PA_chr01_G002841	18391	1							44612	0.7766	12033	1.4273	10926	-2.246	9380	-1.6939	12273
1668	PA_chr01_G002842	9770	2							46817	0.9975	9944	1.8229	9014	-1.5111	14015	-1.4523	13844
1669	PA_chr01_G002843	5314	1							61089	0.8134	11689	-0.4816	17779	1.6771	12851	0.7104	18770
1670	PA_chr01_G002844	195	1				OG0017223	no_significant_change		10306	0.9581	10306
1671	PA_chr01_G002845	1672	4	Belongs to the ubiquitin-conjugating enzyme family	UBC23	Ubiquitin-conjugating enzyme	OG0001345	no_significant_change	1	14638	0.4991	14638
1672	PA_chr01_G002850	1389	1	domain-containing protein			OG0011732	no_significant_change	1	15131	0.4426	15131
1673	PA_chr01_G002851	263033	9				OG0018105	no_significant_change		17991	0.8041	11775	5.441	897	-4.7233	742	3.2549	4577
1674	PA_chr01_G002854	1413	1	Protein BPS1, chloroplastic-like		Arabidopsis protein of unknown function	OG0000770	no_significant_change	1	49698	1.5637	5245	0.3637	18703	1.6404	13083	1.6309	12667
1675	PA_chr01_G002856	1504	1	Protein BPS1, chloroplastic-like		Arabidopsis protein of unknown function	OG0000770	no_significant_change	1	57036	0.5658	14025	1.6058	9981	-1.4422	14517	0.7563	18513
1676	PA_chr01_G002857	1468	1	Protein BPS1, chloroplastic-like		Arabidopsis protein of unknown function	OG0000770	no_significant_change	1	68729	0.3825	15620	-0.5084	17568	-1.1644	16468	0.6513	19073
1677	PA_chr01_G002858	530	1	Protein BPS1, chloroplastic-like			OG0000770	no_significant_change	1	73655	0.3825	15620	-0.5084	17568	0.5973	19737	0.249	20730
1678	PA_chr01_G002859	876	2	Nuclear transport factor		Nuclear transport factor 2 (NTF2) domain	OG0001950	no_significant_change	1	66724	0.5214	14436	-0.5388	17332	1.1009	16915	-0.8319	18041
1679	PA_chr01_G002860	1166	1				OG0031788	no_significant_change		55355	0.3801	15642	0.6992	16016	-2.4646	8186	1.2085	15511
1680	PA_chr01_G002861	545895	30	FATC		NUC194 domain;FATC domain;FAT domain;Phosphatidylinositol 3- and 4-kinase	OG0015275	no_significant_change		26565	0.4551	15024	3.1393	4387	-3.7101	2591	-3.2585	4563
1681	PA_chr01_G002862	1640	2	The light-harvesting complex (LHC) functions as a light receptor, it captures and delivers excitation energy to photosystems with which it is closely associated		Chlorophyll A-B binding protein	OG0004677	no_significant_change		59217	0.4645	14944	-0.8368	14882	1.3609	15092	1.3876	14299
1682	PA_chr01_G002867	185884	9	Required for peroxisome biogenesis and for PTS1- and PTS2-dependent protein import into peroxisomes		Pex2 / Pex12 amino terminal region	OG0005056	no_significant_change	1	30651	0.6136	13577	2.7305	5599	-2.953	5665	2.9599	5810
1683	PA_chr01_G002869	4759	4	TMV resistance protein N-like		TIR domain;NB-ARC domain	OG0002074	no_significant_change	6.91807e-06	75210	0.1913	16736	0.378	18595	-0.5047	20095	-0.5067	19784
1684	PA_chr01_G002870	43773	8	Redoxin		AhpC/TSA family	OG0004734	no_significant_change	0.216539	37481	0.2924	16237	3.403	3750	-2.1988	9644	2.5208	7850
1685	PA_chr01_G002871	376158	13	Mei2-like		RNA recognition motif 2;RNA recognition motif. (a.k.a. RRM, RBD, or RNP domain)	OG0000990	no_significant_change	1	17291	0.6302	13421	-5.9521	608	-4.018	1785	4.4164	1477
1686	PA_chr01_G002872	158602	9	Chromophore lyase CRL		CpeT/CpcT family (DUF1001)	OG0008185	no_significant_change	1	31479	0.4578	15002	2.9827	4832	2.9109	5864	2.9666	5781
1687	PA_chr01_G002873	5632	4	TMV resistance protein N-like		TIR domain;NB-ARC domain;Leucine Rich Repeat	OG0001848	no_significant_change	0.349937	16601	0.2244	16601
1688	PA_chr01_G002874	4457	2	NB-ARC domain		Leucine Rich Repeat	OG0001848	no_significant_change	0.708027	50039	0.5469	14201	2.2191	7398	0.766	18942	-2.1878	9498
1689	PA_chr01_G002875	1292	1				OG0017224	no_significant_change	0.026678	14201	0.5469	14201
1690	PA_chr01_G002876	136391	13	This protein promotes the GTP-dependent binding of aminoacyl-tRNA to the A-site of ribosomes during protein biosynthesis		Elongation factor Tu domain 2;Elongation factor Tu C-terminal domain;Elongation factor Tu GTP binding domain	OG0004615	no_significant_change	1	18266	0.7834	11970	-3.8514	2790	-3.7439	2481	-4.7511	1025
1691	PA_chr01_G002877	2795	1	Pentatricopeptide repeat-containing protein		DYW family of nucleic acid deaminases;PPR repeat family;PPR repeat	OG0031789	no_significant_change		50288	0.6243	13478	-0.9954	13660	1.1843	16334	2.7392	6816
1692	PA_chr01_G002878	93220	2	transcription factor		Myb/SANT-like DNA-binding domain	OG0005517	no_significant_change	1	28666	0.5919	13782	-3.8147	2856	-2.561	7684	-3.3165	4344
1693	PA_chr01_G002879	123797	7	Sec14p-like phosphatidylinositol transfer family protein		CRAL/TRIO domain	OG0008319	no_significant_change		37471	0.5301	14356	2.4463	6540	2.4903	8052	-2.3818	8523
1694	PA_chr01_G002886	2104	1	Belongs to the UDP-glycosyltransferase family		UDP-glucoronosyl and UDP-glucosyl transferase	OG0018038	no_significant_change	1	56194	0.4473	15092	0.015	20300	-0.2614	20802
1695	PA_chr01_G002892	166613	14	Nodulin-like		Nodulin-like	OG0012926	no_significant_change		27855	0.887	10986	3.1032	4486	-3.0264	5329	2.6891	7054
1696	PA_chr01_G002895	189557	20	Glycosyl hydrolases family 38 C-terminal domain		Glycosyl hydrolases family 38 C-terminal beta sandwich domain;Alpha mannosidase middle domain;Glycosyl hydrolases family 38 C-terminal domain	OG0001457	no_significant_change	1	21666	0.6954	12809	3.9585	2600	-3.2851	4148	-4.0672	2109
1697	PA_chr01_G002896	280168	25	Belongs to the TRAFAC class myosin-kinesin ATPase superfamily. Kinesin family		Kinesin motor domain	OG0008025	no_significant_change		20192	0.8636	11209	4.4429	1828	3.1505	4749	3.9397	2406
1698	PA_chr01_G002900	4536	4	TMV resistance protein N-like		TIR domain;NB-ARC domain	OG0002074	no_significant_change	1	61885	0.1742	16792	1.1516	12536	1.7039	12677	0.4856	19880
1699	PA_chr01_G002901	64338	9	SWI SNF complex subunit		SWIRM-associated region 1;SWIRM domain;Myb-like DNA-binding domain	OG0007263	no_significant_change	0.540587	41556	0.4763	14837	1.9785	8352	2.2941	9121	2.2412	9246
1700	PA_chr01_G002903	616	1				OG0026051	no_significant_change	1	16667	0.2093	16667
1701	PA_chr01_G002904	641	1				OG0026051	no_significant_change	1	16762	0.183	16762
1702	PA_chr01_G002905	1991	1	gag-polypeptide of LTR copia-type		gag-polypeptide of LTR copia-type	OG0003131	no_significant_change	1	16957	0	16957
1703	PA_chr01_G002909	2154	4	cell division cycle protein 48		Cell division protein 48 (CDC48), N-terminal domain	OG0001357	no_significant_change	1	16957	0	16957
1704	PA_chr01_G002910	1064	3	Magnesium-chelatase subunit ChlH			OG0003366	no_significant_change	1	15201	0.4344	15201
1705	PA_chr01_G002911	1937	3	GTP-binding GTPase Middle Region		Homeodomain	OG0031791	no_significant_change		16119	0.3119	16119
1706	PA_chr01_G002913	1535	3	Homeobox-leucine zipper protein		Homeodomain	OG0043716	no_significant_change		16221	0.2944	16221
1707	PA_chr01_G002914	980	3	Magnesium-chelatase subunit ChlH			OG0003366	no_significant_change	1	16147	0.3072	16147
1708	PA_chr01_G002915	26916	3				OG0003366	no_significant_change	1	14908	0.4685	14908
1709	PA_chr01_G002916	2067	3	GTP-binding GTPase Middle Region		Homeodomain	OG0031791	no_significant_change		15869	0.3502	15869
1710	PA_chr01_G002917	1603	3	Homeobox-leucine zipper protein		Homeodomain	OG0043716	no_significant_change		15404	0.4092	15404
1711	PA_chr01_G002918	1759	4	Homeobox-leucine zipper protein		Homeodomain	OG0031792	no_significant_change		59068	1.0412	9541	-0.5487	17257	0.9986	17590	-1.3291	14680
1712	PA_chr01_G002919	2158	4	Homeobox-leucine zipper protein		Homeobox associated leucine zipper;Homeodomain	OG0022487	no_significant_change		62828	0.9034	10829	-0.54	17322	-0.8139	18679	-1.1365	15998
1713	PA_chr01_G002920	73622	6	AhpC/TSA family		AhpC/TSA family	OG0004734	no_significant_change	1	39967	1.2106	8014	1.3616	11297	1.8629	11630	2.2819	9026
1714	PA_chr01_G002921	15349	2							51383	0.625	13471	-0.8199	15023	2.3308	8928	1.4356	13961
1715	PA_chr01_G002923	1205	2	Belongs to the ubiquitin-conjugating enzyme family	UBC23		OG0006804	expanded	1	16008	0.3294	16008
1716	PA_chr01_G002924	509	1	endonuclease activity		PPR repeat family	OG0013209	no_significant_change	1	16957	0	16957
1717	PA_chr01_G002925	125339	5	zinc finger CCCH domain-containing protein		SRI (Set2 Rpb1 interacting) domain;Surp module;Zinc finger C-x8-C-x5-C-x3-H type (and similar)	OG0006384	no_significant_change		25219	1.2361	7798	1.8206	9030	-3.3045	4063	-3.3202	4328
1718	PA_chr01_G002929	5075	1	repeat-containing protein		PPR repeat family;PPR repeat	OG0014810	no_significant_change	1	16820	0.1635	16820
1719	PA_chr01_G002930	204986	5			RimP N-terminal domain	OG0003153	no_significant_change	1	21481	0.8649	11196	-4.2682	2067	3.3128	4025	-3.359	4193
1720	PA_chr01_G002931	2243	3	NAC domain-containing protein 94		No apical meristem (NAM) protein	OG0000882	no_significant_change	1	12758	0.701	12758
1721	PA_chr01_G002932	1975	3	NAC domain-containing protein 94		No apical meristem (NAM) protein	OG0000882	no_significant_change	1	15042	0.453	15042
1722	PA_chr01_G002933	121889	5	NAC domain-containing protein 94		No apical meristem (NAM) protein	OG0000882	no_significant_change	1	70631	0.4465	15099	-0.2509	19448	-1.245	15899	-0.417	20185
1723	PA_chr01_G002934	2102	2	NAC domain-containing protein	NAC6		OG0000882	no_significant_change	1	15126	0.4431	15126
1724	PA_chr01_G002935	3477	3	No apical meristem (NAM) protein		No apical meristem (NAM) protein	OG0000882	no_significant_change	1	51290	0.5196	14453	-1.3208	11518	2.0981	10209	1.266	15110
1725	PA_chr01_G002936	1781	3	NAC domain-containing protein 94		No apical meristem (NAM) protein	OG0000882	no_significant_change	1	76356	0.4163	15350	-0.2966	19155	-0.0873	21051	-0.2253	20800
1726	PA_chr01_G002937	962	1	NAC domain-containing protein	NAC6		OG0000882	no_significant_change	1	15402	0.4095	15402
1727	PA_chr01_G002938	819	1				OG0000882	no_significant_change	1	13545	0.6169	13545
1728	PA_chr01_G002939	2577	3	(NAC) domain-containing protein		No apical meristem (NAM) protein	OG0000882	no_significant_change	1	33488	1.8617	3438	-1.3561	11333	-2.8765	6047	1.6306	12670
1729	PA_chr01_G002940	1642	3	NAC domain-containing protein 94		No apical meristem (NAM) protein	OG0000882	no_significant_change	1	60436	0.7408	12377	0.9506	13998	1.2281	16016	0.8314	18045
1730	PA_chr01_G002941	1641	3	No apical meristem (NAM) protein	NAC6	No apical meristem (NAM) protein	OG0000882	no_significant_change	1	52309	0.6741	13008	2.4274	6600	-1.2665	15746	1.0011	16955
1731	PA_chr01_G002942	22946	3	No apical meristem (NAM) protein	NAC6	No apical meristem (NAM) protein	OG0000882	no_significant_change	1	38604	0.5205	14444	2.542	6209	-2.2803	9196	-2.3323	8755
1732	PA_chr01_G002946	1802	3	NAC domain-containing protein 94		No apical meristem (NAM) protein	OG0000882	no_significant_change	1	50603	0.4244	15286	0.7012	15999	2.4274	8391	-1.9236	10927
1733	PA_chr01_G002947	2473	3	(NAC) domain-containing protein		No apical meristem (NAM) protein	OG0000882	no_significant_change	1	54738	1.0695	9278	-0.4496	18042	-1.3467	15186	-1.7013	12232
1734	PA_chr01_G002948	1420	3	NAC domain-containing protein 94		No apical meristem (NAM) protein	OG0000882	no_significant_change	1	44288	0.7966	11844	1.7726	9223	1.8736	11556	1.7947	11665
1735	PA_chr01_G002949	1935	3	Calcium-dependent protein	CPK15	Protein kinase domain	OG0020240	no_significant_change	1.93588e-06	68529	0.495	14673	0.4364	18147	-0.8837	18274	-0.9285	17435
1736	PA_chr01_G002950	1872	3	Calcium-dependent protein	CPK15	Protein kinase domain	OG0020240	no_significant_change	1	61022	0.8939	10918	-1.0295	13402	-0.984	17677	-0.6606	19025
1737	PA_chr01_G002951	1811	3	protein serine/threonine kinase activity		Protein kinase domain	OG0020240	no_significant_change	1.89141e-06	72405	0.473	14867	-0.3467	18827	-0.5867	19785	-0.6801	18926
1738	PA_chr01_G002952	2268	3	No apical meristem (NAM) protein		No apical meristem (NAM) protein	OG0000882	no_significant_change	1	45262	0.6155	13559	-1.1569	12507	3.0855	5058	1.4117	14138
1739	PA_chr01_G002953	1551	3	NAC domain-containing protein	NAC6	No apical meristem (NAM) protein	OG0000882	no_significant_change	1	47982	0.4676	14915	0.8622	14683	2.0132	10701	2.5533	7683
1740	PA_chr01_G002954	2259	3	NAC domain-containing protein	NAC6	No apical meristem (NAM) protein	OG0000882	no_significant_change	1	54013	0.5437	14232	1.0098	13547	-1.753	12344	-1.4463	13890
1741	PA_chr01_G002955	2210	2	NAC domain-containing protein	NAC6	No apical meristem (NAM) protein	OG0000882	no_significant_change	1	72967	0.3707	15716	0.1863	19787	-0.7807	18860	-0.7415	18604
1742	PA_chr01_G002956	1651	3	NAC domain-containing protein		No apical meristem (NAM) protein	OG0000882	no_significant_change	1	75615	0.3692	15728	-0.4157	18302	-0.1877	20926	-0.2791	20659
1743	PA_chr01_G002957	1415	2				OG0022488	no_significant_change	1	69782	0.4557	15018	0.3176	19024	-0.9778	17714	-0.8339	18026
1744	PA_chr01_G002958	2210	3	NAC domain-containing protein		No apical meristem (NAM) protein	OG0000882	no_significant_change	1	62239	0.4463	15101	0.6305	16578	-1.6436	13068	0.9187	17492
1745	PA_chr01_G002959	1392	3	NAC domain-containing protein 94		No apical meristem (NAM) protein	OG0000882	no_significant_change	1	42626	0.694	12823	0.6019	16808	2.9987	5452	2.5815	7543
1746	PA_chr01_G002960	1245	3	No apical meristem (NAM) protein		No apical meristem (NAM) protein	OG0000882	no_significant_change	1	12588	0.7187	12588
1747	PA_chr01_G002961	1948	3	No apical meristem (NAM) protein		No apical meristem (NAM) protein	OG0000882	no_significant_change	1	10389	0.949	10389
1748	PA_chr01_G002962	1345	3	NAC domain-containing protein 94		No apical meristem (NAM) protein	OG0000882	no_significant_change	1	15557	0.3905	15557
1749	PA_chr01_G002963	1324	3	NAC domain-containing protein 94		No apical meristem (NAM) protein	OG0000882	no_significant_change	1	16149	0.307	16149
1750	PA_chr01_G002964	1300	3	No apical meristem (NAM) protein		No apical meristem (NAM) protein	OG0000882	no_significant_change	1	68792	0.3977	15499	-0.2682	19348	-1.0586	17199	-1.0304	16746
1751	PA_chr01_G002965	244531	6	tRNA (Guanine(10)-N2)-methyltransferase homolog		Putative RNA methylase family UPF0020	OG0006383	no_significant_change		28139	0.8852	11003	-3.0323	4697	3.2289	4401	-2.4823	8038
1752	PA_chr01_G002968	183253	10	Pyrophosphatase that hydrolyzes non-canonical purine nucleotides such as inosine triphosphate (ITP), deoxyinosine triphosphate (dITP) or xanthosine 5'-triphosphate (XTP) to their respective monophosphate derivatives. The enzyme does not distinguish between the deoxy- and ribose forms. Probably excludes non-canonical purines from RNA and DNA precursor pools, thus preventing their incorporation int…		Ham1 family	OG0010053	no_significant_change		25501	0.9001	10862	2.9545	4921	-3.152	4744	-3.1514	4974
1753	PA_chr01_G002969	1954	1							53610	0.5151	14491	-1.2441	11959	-1.6883	12780	1.3746	14380
1754	PA_chr01_G002970	694	1	Belongs to the peptidase S8 family			OG0031793	no_significant_change		65648	0.5151	14491	-0.9839	13745	0.9866	17657	0.5132	19755
1755	PA_chr01_G002971	173231	3	RING-variant domain			OG0004144	no_significant_change	1	28377	0.6698	13048	-3.7023	3070	3.1804	4611	2.559	7648
1756	PA_chr01_G002973	232812	18	acyl-activating enzyme 16	AAE15	AMP-binding enzyme	OG0005810	no_significant_change	1	23993	0.6751	13000	-3.2247	4168	-3.2883	4134	-3.83	2691
1757	PA_chr01_G002975	5081	2	Belongs to the protein kinase superfamily. Ser Thr protein kinase family		Leucine rich repeat;Leucine rich repeat N-terminal domain;Leucine Rich Repeat;Protein kinase domain	OG0000747	no_significant_change	0.872432	55853	0.6853	12905	-0.9669	13878	-1.6038	13351	-1.1771	15719
1758	PA_chr01_G002978	70535	3	DUF218 domain		DUF218 domain	OG0007333	no_significant_change	1	29116	0.4271	15265	2.401	6699	-3.4028	3662	3.5628	3490
1759	PA_chr01_G002979	2566	1	Nodulin-like		Major Facilitator Superfamily;Nodulin-like	OG0000346	no_significant_change	1	54663	0.6021	13684	0.7724	15406	1.8958	11422	-1.4101	14151
1760	PA_chr01_G002980	2580	1	Nodulin-like		Nodulin-like	OG0000346	no_significant_change	1	45374	0.398	15496	-1.2564	11885	-2.057	10443	-2.5799	7550
1761	PA_chr01_G002981	2221	1	transmembrane transport		Major Facilitator Superfamily;Nodulin-like	OG0000346	no_significant_change	1	67782	0.8087	11733	0.1673	19874	-0.7633	18955	-0.9623	17220
1762	PA_chr01_G002983	3117	2	Belongs to the glycosyltransferase 8 family		Glycosyl transferase family 8	OG0001669	no_significant_change	1	63091	0.5092	14546	-0.7036	15977	-1.29	15594	0.9985	16974
1763	PA_chr01_G002984	2701	1	transmembrane transport		Nodulin-like	OG0000346	no_significant_change	1	49920	0.6986	12780	-1.1763	12382	2.0344	10575	-1.4051	14183
1764	PA_chr01_G002985	2166	1	transmembrane transport		Major Facilitator Superfamily;Nodulin-like	OG0000346	no_significant_change	1	68849	0.573	13956	0.5319	17385	-0.8249	18619	-0.6875	18889
1765	PA_chr01_G002986	5858	3	Cyclin-dependent kinase		Protein kinase domain	OG0002001	no_significant_change	1	15445	0.4039	15445
1766	PA_chr01_G002987	2224	1	transmembrane transport		Nodulin-like	OG0000346	no_significant_change	1	14641	0.4988	14641
1767	PA_chr01_G002988	2619	1	transmembrane transport		Major Facilitator Superfamily;Nodulin-like	OG0000346	no_significant_change	1	63212	0.5714	13971	0.6941	16057	-1.2433	15911	0.9534	17273
1768	PA_chr01_G002990	2607	1	transmembrane transport		Nodulin-like	OG0000346	no_significant_change	1	61785	0.7401	12383	0.4808	17786	1.2175	16098	-1.207	15518
1769	PA_chr01_G002991	505720	11	GDT1-like protein 2		Uncharacterized protein family UPF0016	OG0008044	no_significant_change	1	26621	0.4965	14660	3.1423	4380	-3.589	2968	-3.2456	4613
1770	PA_chr01_G002994	825	1				OG0016235	no_significant_change	1	59532	0.2447	16507	0.7153	15881	1.6553	13001	1.411	14143
1771	PA_chr01_G002996	5984	6				OG0000802	no_significant_change	0.0437684	54657	0.5327	14331	-0.9917	13686	1.3099	15447	1.8776	11193
1772	PA_chr01_G002997	13057	15	Belongs to the MCM family		MCM AAA-lid domain;MCM OB domain;MCM N-terminal domain;MCM P-loop domain	OG0008908	no_significant_change		31078	1.1983	8121	2.3649	6847	1.7982	12045	3.3973	4065
1773	PA_chr01_G002998	2868	3	rop guanine nucleotide exchange factor		PRONE (Plant-specific Rop nucleotide exchanger)	OG0016222	no_significant_change	1	12091	0.7707	12091
1774	PA_chr01_G002999	39014	10	Belongs to the aldehyde dehydrogenase family		Aldehyde dehydrogenase family	OG0003637	no_significant_change	1	14684	0.9403	10474	5.9126	630	-4.3074	1229	-3.9622	2351
1775	PA_chr01_G003000	136585	10	Belongs to the aldehyde dehydrogenase family		Aldehyde dehydrogenase family	OG0003637	no_significant_change	0.461008	12247	1.5406	5403	5.5728	823	-3.3808	3736	-3.9873	2285
1776	PA_chr01_G003002	47417	12	Belongs to the peroxidase family	APX7	Peroxidase	OG0007073	no_significant_change		25637	1.4809	5813	1.8175	9045	2.5632	7675	3.6856	3104
1777	PA_chr01_G003004	7786	10	Belongs to the peptidase A1 family		Xylanase inhibitor N-terminal;Xylanase inhibitor C-terminal	OG0001214	no_significant_change	0.030292	44436	1.8233	3634	-0.7952	15225	1.4308	14591	-1.9127	10986
1778	PA_chr01_G003005	8620	9	Belongs to the peptidase A1 family		Xylanase inhibitor N-terminal;Xylanase inhibitor C-terminal	OG0001214	no_significant_change	1	60083	0.9515	10368	-0.287	19224	1.2499	15865	1.3378	14626
1779	PA_chr01_G003006	9185	8	Belongs to the peptidase A1 family		Xylanase inhibitor N-terminal;Xylanase inhibitor C-terminal				39388	0.9232	10637	-1.8464	8909	2.7217	6858	1.5838	12984
1780	PA_chr01_G003007	8703	10	Belongs to the peptidase A1 family		Xylanase inhibitor N-terminal;Xylanase inhibitor C-terminal	OG0001214	no_significant_change	0.391195	47724	1.707	4303	0.7617	15491	-1.7929	12074	-1.1568	15856
1781	PA_chr01_G003008	3730	2				OG0026053	no_significant_change		30591	1.0503	9453	-3.0162	4739	2.53	7843	-2.3744	8556
1782	PA_chr01_G003010	1061	1				OG0001946	no_significant_change	1	13226	0.6511	13226
1783	PA_chr01_G003011	28733	10	Belongs to the peptidase A1 family		Xylanase inhibitor N-terminal;Xylanase inhibitor C-terminal	OG0001214	no_significant_change	1	18065	1.8175	3659	4.2846	2042	3.1139	4923	2.6035	7441
1784	PA_chr01_G003012	4155	2	At4g28440-like			OG0001017	no_significant_change	1	39524	1.1631	8440	-1.5078	10492	2.1412	9947	1.9711	10645
1785	PA_chr01_G003013	92100	6	Glutaredoxin		Glutaredoxin	OG0001705	no_significant_change	5.61045e-07	29087	1.1166	8848	1.5245	10412	-2.7057	6934	3.7581	2893
1786	PA_chr01_G003015	179664	10	Belongs to the peptidase S10 family		Serine carboxypeptidase	OG0003334	no_significant_change	1	11218	1.9018	3251	-3.7518	2982	-3.7963	2309	-3.8348	2676
1787	PA_chr01_G003016	25548	4	GDSL/SGNH-like Acyl-Esterase family found in Pmr5 and Cas1p		PMR5 N terminal Domain;GDSL/SGNH-like Acyl-Esterase family found in Pmr5 and Cas1p	OG0004350	no_significant_change	0.0829083	27541	1.7055	4314	2.0739	7962	-2.9336	5756	2.1856	9509
1788	PA_chr01_G003018	1465	1	PsaA and PsaB bind P700, the primary electron donor of photosystem I (PSI), as well as the electron acceptors A0, A1 and FX. PSI is a plastocyanin-ferredoxin oxidoreductase, converting photonic excitation into a charge separation, which transfers an electron from the donor P700 chlorophyll pair to the spectroscopically characterized acceptors A0, A1, FX, FA and FB in turn. Oxidized P700 is reduce…	psaB	Photosystem I psaA/psaB protein	OG0000231	expanded		9947	0.9972	9947
1789	PA_chr01_G003019	1568	1	copper transporter			OG0006466	no_significant_change	0.309287	30163	0.864	11205	3.0694	4591	-2.7663	6619	-2.5409	7748
1790	PA_chr01_G003020	1077	1	Thaumatin family		Thaumatin family	OG0000227	no_significant_change	9.31815e-05	10114	0.9789	10114
1791	PA_chr01_G003021	935	2	Thaumatin family		Thaumatin family	OG0000227	no_significant_change	1	7772	1.2392	7772
1792	PA_chr01_G003022	80633	3	thaumatin-like protein		Thaumatin family	OG0000227	no_significant_change	1	12323	1.3662	6711	4.9559	1247	-3.7774	2366	-4.1159	1999
1793	PA_chr01_G003023	293051	3	thaumatin-like protein		Thaumatin family	OG0000227	no_significant_change	1	23208	1.0521	9435	-4.2951	2030	2.4438	8301	3.5783	3442
1794	PA_chr01_G003024	48801	2	Thaumatin family		Thaumatin family	OG0000227	no_significant_change	1	40344	1.0521	9435	1.1604	12487	2.1222	10058	-2.4158	8364
1795	PA_chr01_G003025	1264	2	thaumatin-like protein		Thaumatin family	OG0000227	no_significant_change	1	12478	0.7302	12478
1796	PA_chr01_G003027	1332	2	thaumatin-like protein		Thaumatin family	OG0000227	no_significant_change	1	71746	0.7339	12443	0.2319	19561	0.5103	20073	-0.5308	19669
1797	PA_chr01_G003028	399710	8	RING-type zinc-finger		WD domain, G-beta repeat;Protein kinase domain	OG0010038	no_significant_change		20849	1.0007	9915	3.4592	3618	3.8457	2184	3.1177	5132
1798	PA_chr01_G003031	35677	2	Methyl-CpG-binding domain protein			OG0003876	no_significant_change	0.00831023	23971	1.5818	5124	1.9286	8579	3.2009	4524	-2.9746	5744
1799	PA_chr01_G003032	3966	4	Belongs to the peptidase A1 family		Xylanase inhibitor N-terminal	OG0000498	no_significant_change	0.029946	36715	1.5333	5452	1.3066	11600	2.6794	7066	1.6415	12597
1800	PA_chr01_G003033	6401	5	Belongs to the peptidase A1 family		Xylanase inhibitor N-terminal	OG0000498	no_significant_change	1	40788	0.9437	10441	1.5471	10284	-2.3434	8867	-1.8769	11196
1801	PA_chr01_G003034	4819	4	Belongs to the peptidase A1 family		Xylanase inhibitor N-terminal	OG0000498	no_significant_change	1	38555	2.1991	2203	1.4213	10956	-1.5022	14079	1.8578	11317
1802	PA_chr01_G003035	1067	2	Belongs to the peptidase A1 family			OG0012569	no_significant_change	1	57175	1.5522	5322	-0.3151	19040	0.9265	18013	1.3115	14800
1803	PA_chr01_G003036	774	1	Protein of unknown function (DUF 659)						32279	1.6083	4940	1.127	12711	1.8377	11785	3.7738	2843
1804	PA_chr01_G003037	24804	4	ubiquitin-conjugating enzyme		Ubiquitin-conjugating enzyme	OG0001961	no_significant_change	1	37887	1.4021	6434	0.7503	15589	-2.3905	8597	-2.6424	7267
1805	PA_chr01_G003039	261976	15	Histone-lysine N-methyltransferase ASHH2-like		AWS domain;SET domain	OG0003551	no_significant_change	1	12742	1.1585	8482	7.2969	206	3.4559	3457	5.1945	597
1806	PA_chr01_G003041	386772	11	isoform X1			OG0008636	no_significant_change		22035	1.0686	9287	-2.8834	5148	-2.9868	5502	-4.0727	2098
1807	PA_chr01_G003044	266439	7	Peptide chain release factor		PCRF domain;RF-1 domain	OG0007811	no_significant_change		10605	1.2306	7846	6.0192	579	-4.3559	1160	4.7564	1020
1808	PA_chr01_G003046	7908	3	Belongs to the universal ribosomal protein uS4 family		S4 domain;Ribosomal protein S4/S9 N-terminal domain	OG0002086	no_significant_change	1	42321	0.8386	11445	1.9724	8381	2.0403	10541	1.7472	11954
1809	PA_chr01_G003048	6201	6	Transcription factor ABORTED		bHLH-MYC and R2R3-MYB transcription factors N-terminal	OG0002138	no_significant_change	0.720479	45489	1.3324	6995	-0.7944	15232	1.4281	14611	2.354	8651
1810	PA_chr01_G003050	66949	3	3'-5' exonuclease domain-containing protein K homology domain-containing protein KH domain-containing protein			OG0031794	no_significant_change		8535	1.8626	3435	3.4981	3516	5.9871	106	-4.4158	1478
1811	PA_chr01_G003051	3540	1	Pentatricopeptide repeat-containing protein		DYW family of nucleic acid deaminases;PPR repeat family;PPR repeat	OG0031795	no_significant_change		46774	1.0199	9732	0.8407	14850	1.7566	12322	2.1127	9870
1812	PA_chr01_G003052	3598	1				OG0010560	no_significant_change	0.00398203	46774	1.0199	9732	0.8407	14850	1.7566	12322	2.1127	9870
1813	PA_chr01_G003054	67590	3	F-Box protein		F-box domain	OG0003240	no_significant_change		29647	1.4201	6284	2.8007	5375	2.2783	9208	2.3284	8780
1814	PA_chr01_G003056	9046	1	ABC transporter F family member		ABC transporter	OG0003987	no_significant_change		43756	1.4587	5977	0.9722	13836	1.6017	13362	-1.9829	10581
1815	PA_chr01_G003057	1437	1				OG0004281	no_significant_change	1	13255	0.6478	13255
1816	PA_chr01_G003058	2781	4	Belongs to the MIP aquaporin (TC 1.A.8) family		Major intrinsic protein	OG0000125	no_significant_change	1	49384	1.7431	4087	-0.4478	18056	-2.0177	10675	-1.0568	16566
1817	PA_chr01_G003059	159680	9	Belongs to the nucleosome assembly protein (NAP) family		Nucleosome assembly protein (NAP)	OG0003254	no_significant_change	1	21501	1.1144	8868	3.1152	4446	3.5713	3026	3.11	5161
1818	PA_chr01_G003061	1268	1				OG0004984	no_significant_change	1	4248	1.7158	4248
1819	PA_chr01_G003062	2120	1	Belongs to the UDP-glycosyltransferase family		UDP-glucoronosyl and UDP-glucosyl transferase	OG0000607	expanded	1	37410	1.7158	4248	1.5247	10411	-1.9276	11215	-1.8161	11536
1820	PA_chr01_G003063	233376	5	Belongs to the DHHC palmitoyltransferase family		DHHC palmitoyltransferase	OG0000716	no_significant_change	1	7435	1.9436	3077	-4.7896	1416	4.1846	1455	-4.4094	1487
1821	PA_chr01_G003064	329012	14	Mur ligase family, catalytic domain		Mur ligase middle domain;Mur ligase family, glutamate ligase domain;Mur ligase family, catalytic domain	OG0010727	no_significant_change		18823	1.3711	6673	-2.9154	5044	3.3355	3929	-3.6582	3177
1822	PA_chr01_G003065	2246	2	transcription factor		AP2 domain	OG0000003	no_significant_change		45489	2.1495	2326	-1.2641	11840	1.4308	14591	-1.0322	16732
1823	PA_chr01_G003071	24891	2				OG0043719	no_significant_change		21686	2.347	1830	2.2495	7297	-2.8681	6091	-2.8162	6468
1824	PA_chr01_G003072	805	1	RNase H						70935	0.2163	16634	0.398	18438	-1.3338	15280	0.305	20583
1825	PA_chr01_G003074	11548	2	nudC domain-containing protein		CS domain	OG0022489	no_significant_change	1	16635	0.2161	16635
1826	PA_chr01_G003075	63825	4	AP2-like ethylene-responsive transcription factor			OG0025186	no_significant_change	0.0991958	16957	0	16957
1827	PA_chr01_G003077	1031	1				OG0018170	no_significant_change		16957	0	16957
1828	PA_chr01_G003079	87979	3				OG0016236	no_significant_change	1	14692	0.4928	14692
1829	PA_chr01_G003081	11534	2	nudC domain-containing protein		CS domain	OG0022489	no_significant_change	1	9308	1.066	9308
1830	PA_chr01_G003082	1031	1				OG0018170	no_significant_change		16957	0	16957
1831	PA_chr01_G003083	120042	3				OG0016236	no_significant_change	1	16957	0	16957
1832	PA_chr01_G003085	11617	2	nudC domain-containing protein		CS domain	OG0022489	no_significant_change	1	16957	0	16957
1833	PA_chr01_G003087	98670	2				OG0016236	no_significant_change	1	16957	0	16957
1834	PA_chr01_G003088	78244	3				OG0018170	no_significant_change		16957	0	16957
1835	PA_chr01_G003090	107807	3				OG0016236	no_significant_change	0.000148435	13535	0.618	13535
1836	PA_chr01_G003091	1245	1				OG0018170	no_significant_change		15039	0.4533	15039
1837	PA_chr01_G003093	75715	2				OG0016236	no_significant_change	1	5611	1.51	5611
1838	PA_chr01_G003096	88200	1				OG0018170	no_significant_change		11915	0.7892	11915
1839	PA_chr01_G003098	538	1							11915	0.7892	11915
1840	PA_chr01_G003099	70795	1				OG0018170	no_significant_change		12742	0.7026	12742
1841	PA_chr01_G003100	108395	3				OG0016236	no_significant_change	1	16385	0.2688	16385
1842	PA_chr01_G003101	155824	1	pentatricopeptide repeat-containing protein At3g13770			OG0008270	no_significant_change	1	15012	1.893	3286	2.2504	7296	-4.1403	1544	-3.7593	2886
1843	PA_chr01_G003103	22976	3	AP2-like ethylene-responsive transcription factor			OG0025186	no_significant_change		41746	1.0537	9420	1.4765	10657	-2.3436	8866	1.6097	12803
1844	PA_chr01_G003105	28123	28	Cullin-associated NEDD8-dissociated protein	CAND1	TATA-binding protein interacting (TIP20)	OG0006753	no_significant_change		28359	1.6136	4904	-2.451	6522	3.0144	5381	-1.8131	11552
1845	PA_chr01_G003107	71369	4	Belongs to the NPH3 family		NPH3 family	OG0000970	no_significant_change	1	18310	1.3595	6766	-3.0208	4729	-3.186	4590	-4.0133	2225
1846	PA_chr01_G003110	2886	3	Salt tolerance-like protein		B-box zinc finger	OG0001456	no_significant_change	1	50991	1.3826	6580	0.9158	14260	1.7112	12626	0.9137	17525
1847	PA_chr01_G003111	1722	1	LRR receptor-like serine threonine-protein kinase		Leucine rich repeat	OG0001719	no_significant_change	1	55094	1.788	3828	0.6422	16480	1.2928	15576	0.6266	19210
1848	PA_chr01_G003112	458207	10	C2 and GRAM domain-containing protein		VAD1 Analog of StAR-related lipid transfer domain;GRAM domain;C2 domain	OG0002896	no_significant_change	1	2106	4.6014	181	-5.5946	815	5.059	475	-5.1589	635
1849	PA_chr01_G003113	215320	5				OG0009542	no_significant_change		6419	5.3821	86	-5.2201	1050	3.7816	2348	-3.7422	2935
1850	PA_chr01_G003116	98383	3	ABSCISIC ACID-INSENSITIVE 5-like protein		bZIP transcription factor	OG0015466	no_significant_change	1	3671	5.1346	109	-5.5407	847	4.5921	873	-4.1992	1842
1851	PA_chr01_G003120	5026	1	At4g38062-like			OG0011939	no_significant_change	1	1692	2.4246	1692
1852	PA_chr01_G003121	1313	1	At4g38062-like			OG0011349	no_significant_change	1	15033	0.4541	15033
1853	PA_chr01_G003122	1559	1				OG0020231	no_significant_change	1	15033	0.4541	15033
1854	PA_chr01_G003124	75855	3	Heavy metal-associated isoprenylated plant protein		Heavy-metal-associated domain	OG0000178	no_significant_change	1	19806	2.574	1396	-3.0732	4577	-2.3478	8839	3.1459	4994
1855	PA_chr01_G003126	1367	3	Heavy metal-associated isoprenylated plant protein		Heavy-metal-associated domain	OG0000178	no_significant_change	1	49346	1.1981	8122	1.2818	11743	1.1921	16278	1.5483	13203
1856	PA_chr01_G003128	1257	3	Heavy metal-associated isoprenylated plant protein		Heavy-metal-associated domain	OG0000178	no_significant_change	1	56479	0.5307	14350	-1.3948	11097	-1.5475	13747	-0.9517	17285
1857	PA_chr01_G003130	5134	5	Heavy metal-associated isoprenylated plant protein		Heavy-metal-associated domain	OG0000178	no_significant_change	1	27710	1.6003	4997	2.2755	7195	-2.6214	7364	-2.4605	8154
1858	PA_chr01_G003131	52600	2				OG0016236	no_significant_change	1	24376	1.6742	4510	2.6921	5728	-3.0442	5246	2.307	8892
1859	PA_chr01_G003132	1364	3	Heavy metal-associated isoprenylated plant protein		Heavy-metal-associated domain	OG0000178	no_significant_change	1	42347	2.1809	2249	-0.7749	15387	-1.5139	13990	-1.9576	10721
1860	PA_chr01_G003133	40259	13	Mitochondrial import inner membrane translocase subunit		Tim44-like domain	OG0005408	no_significant_change	1	17696	1.803	3737	3.305	3969	-2.6737	7099	-3.7585	2891
1861	PA_chr01_G003134	11630	1				OG0043721	no_significant_change		61754	1.0738	9239	-0.8506	14770	-0.6684	19419	-0.7848	18326
1862	PA_chr01_G003135	18755	5	B3 domain-containing protein		B3 DNA binding domain	OG0000079	no_significant_change	1	38311	0.9428	10449	-2.224	7379	-1.8208	11892	-2.3672	8591
1863	PA_chr01_G003136	1061	1				OG0043721	no_significant_change		45179	0.864	11205	-0.976	13805	-0.4828	20169
1864	PA_chr01_G003137	41862	2							29955	1.0708	9268	-3.4582	3620	-2.7981	6451	1.9771	10616
1865	PA_chr01_G003138	16183	3	B3 domain-containing transcription factor		B3 DNA binding domain	OG0000079	no_significant_change	1	31428	1.3014	7253	-5.0805	1147	2.0495	10489	1.6504	12539
1866	PA_chr01_G003139	1546	3	B3 domain-containing protein		B3 DNA binding domain	OG0000079	no_significant_change	1	38233	2.9963	851	-1.5315	10376	0.9856	17663	-2.2195	9343
1867	PA_chr01_G003140	1481	3	B3 domain-containing protein		B3 DNA binding domain	OG0000079	no_significant_change	1	53659	1.8251	3623	0.271	19329	-1.0414	17311	-1.5194	13396
1868	PA_chr01_G003141	42678	3	B3 domain-containing protein		B3 DNA binding domain	OG0000079	no_significant_change	1	27974	1.5755	5166	-2.7698	5469	-2.5039	7983	-2.2168	9356
1869	PA_chr01_G003142	163019	4	B3 domain-containing protein		B3 DNA binding domain	OG0000079	no_significant_change	1	15561	1.3631	6736	-4.6942	1532	-3.6702	2708	-3.2528	4585
1870	PA_chr01_G003143	270077	5	B3 domain-containing protein		B3 DNA binding domain	OG0000079	no_significant_change	8.90806e-05	7793	2.0839	2534	-5.5257	853	4.8031	670	3.4858	3736
1871	PA_chr01_G003145	5981	7	La-related protein		La domain	OG0002738	no_significant_change	0.0105534	41596	1.7455	4073	1.2121	12157	2.241	9410	1.143	15956
1872	PA_chr01_G003146	5920	1							41596	1.7455	4073	1.2121	12157	2.241	9410	1.143	15956
1873	PA_chr01_G003147	450665	14	Heparan-alpha-glucosaminide N-acetyltransferase-like		Protein of unknown function (DUF1624)	OG0001707	no_significant_change	0.189433	17764	1.2995	7270	-3.3558	3852	-3.4103	3638	-3.717	3004
1874	PA_chr01_G003153	842	1				OG0043722	no_significant_change		41223	3.4436	525	-2.0583	8023	1.5168	13968	-0.7233	18707
1875	PA_chr01_G003154	111385	1	Pentatricopeptide repeat-containing protein At5g64320		Pentatricopeptide repeat domain;PPR repeat family;PPR repeat	OG0016791	no_significant_change		3219	11.4428	4	-6.1749	514	4.8	674	-4.1023	2027
1876	PA_chr01_G003155	1343	1	Catalyzes the conversion of hemimercaptal, formed from methylglyoxal and glutathione, to S-lactoylglutathione		Glyoxalase/Bleomycin resistance protein/Dioxygenase superfamily	OG0039391	no_significant_change		71664	0.775	12049	-0.4654	17919	-0.1318	21009	-0.267	20687
1877	PA_chr01_G003156	1163	1	E3 ubiquitin-protein ligase RHA1B-like			OG0043723	no_significant_change		65138	0.7696	12102	-0.8458	14809	-0.5836	19799	-0.7693	18428
1878	PA_chr01_G003157	1050	1	RING-like zinc finger		Ring finger domain	OG0018501	no_significant_change	0.663199	9964	0.9953	9964
1879	PA_chr01_G003159	1109	1	E3 ubiquitin-protein ligase RHA1B-like			OG0043723	no_significant_change		10468	0.9409	10468
1880	PA_chr01_G003163	1444	1	E3 ubiquitin-protein ligase RHA1B-like		Ring finger domain	OG0018501	no_significant_change	1	50799	1.0774	9203	1.5954	10037	-1.4791	14250	0.9485	17309
1881	PA_chr01_G003164	1330	1	RING-like zinc finger		Ring finger domain	OG0018501	no_significant_change	4.20577e-09	12044	0.7755	12044
1882	PA_chr01_G003166	1403	1	RING-like zinc finger		Ring finger domain	OG0018501	no_significant_change	1	16957	0	16957
1883	PA_chr01_G003167	1599	2	E3 ubiquitin-protein ligase RHA1B-like		Ring finger domain	OG0031797	no_significant_change		52778	1.1798	8289	-0.8802	14546	-1.1648	16465	-1.5068	13478
1884	PA_chr01_G003168	218322	12	Belongs to the peptidase C19 family		Ubiquitin carboxyl-terminal hydrolase	OG0009183	no_significant_change	1	17493	1.6929	4388	-2.6533	5848	-4.1429	1537	2.9807	5720
1885	PA_chr01_G003169	3121	3	Transcription factor bHLH95-like		Helix-loop-helix DNA-binding domain	OG0003460	no_significant_change	1	54954	0.9186	10682	-0.558	17186	-2.1039	10173	1.0069	16913
1886	PA_chr01_G003170	31350	3	Trm112p-like protein		Trm112p-like protein	OG0011804	no_significant_change		29287	1.6439	4703	-1.2846	11727	-3.5243	3197	-2.1548	9660
1887	PA_chr01_G003172	376661	6	WD-40 repeat-containing protein	MSI1	Histone-binding protein RBBP4 or subunit C of CAF1 complex;WD domain, G-beta repeat	OG0001982	no_significant_change	1	20195	1.3135	7151	-4.0113	2508	-3.0371	5281	3.0905	5255
1888	PA_chr01_G003175	9646	3	Photosystem II 10 kDa polypeptide		Photosystem II 10 kDa polypeptide PsbR	OG0004690	no_significant_change		40264	0.8332	11497	1.4418	10842	2.2807	9194	-2.3365	8731
1889	PA_chr01_G003178	57184	6	Belongs to the aldehyde dehydrogenase family		Aldehyde dehydrogenase family	OG0022490	no_significant_change		13107	1.6824	4460	-3.8199	2847	3.4432	3505	3.9818	2295
1890	PA_chr01_G003179	40522	6	Belongs to the glycosyl hydrolase 31 family		Domain of unknown function (DUF5110);Galactose mutarotase-like;Glycosyl hydrolases family 31	OG0006315	no_significant_change		28998	1.3925	6508	-1.9421	8514	-2.6358	7282	-2.765	6694
1891	PA_chr01_G003180	2663	1	belongs to the protein kinase superfamily		Protein kinase domain	OG0009803	no_significant_change		61761	1.1321	8713	-0.6888	16100	0.6977	19289	-0.8932	17659
1892	PA_chr01_G003181	2430	1	RING-type E3 ubiquitin transferase			OG0002231	no_significant_change	1	59311	1.0256	9684	-0.5265	17427	1.0492	17258	1.2917	14942
1893	PA_chr01_G003182	96912	2				OG0016005	no_significant_change		23166	1.9478	3065	2.7651	5480	2.4209	8434	2.8766	6187
1894	PA_chr01_G003183	1669	1	DEAD-box ATP-dependent RNA helicase		Helicase conserved C-terminal domain;DEAD/DEAH box helicase	OG0003241	no_significant_change	1	45427	1.3282	7028	0.4726	17858	-2.313	9030	-1.821	11511
1895	PA_chr01_G003184	3802	7	Protein of unknown function (DUF3675)		RING-variant domain;Protein of unknown function (DUF3675)	OG0001371	no_significant_change	1	56337	1.1358	8681	-0.6251	16622	-1.0556	17218	-1.4565	13816
1896	PA_chr01_G003186	9103	8	receptor-like serine threonine-protein kinase At5g57670		Universal stress protein family;Protein kinase domain	OG0000942	no_significant_change	0.0123694	48936	1.3436	6894	-0.9922	13682	-1.4024	14799	1.4954	13561
1897	PA_chr01_G003189	1110	2				OG0031798	no_significant_change		53988	1.5383	5421	-0.5912	16900	1.3007	15518	-1.1155	16149
1898	PA_chr01_G003190	3106	1	DYW family of nucleic acid deaminases		DYW family of nucleic acid deaminases;PPR repeat family	OG0000000	no_significant_change		59163	1.4952	5716	-0.5004	17632	0.8892	18243	0.9065	17572
1899	PA_chr01_G003191	1512	2	Belongs to the 'GDSL' lipolytic enzyme family		GDSL-like Lipase/Acylhydrolase	OG0000093	no_significant_change	1	51882	1.9114	3208	0.4634	17935	1.1495	16577	-1.4085	14162
1900	PA_chr01_G003192	1456	2	glutathione s-transferase		Glutathione S-transferase, N-terminal domain;Glutathione S-transferase, C-terminal domain	OG0000054	no_significant_change	1	64292	0.8267	11559	-0.5633	17142	0.9654	17785	-0.8695	17806
1901	PA_chr01_G003194	312259	4				OG0007958	no_significant_change		17865	1.4812	5810	-3.8754	2749	-2.8086	6388	3.7497	2918
1902	PA_chr01_G003200	5379	2	RNA polymerase II transcriptional coactivator		Transcriptional Coactivator p15 (PC4)	OG0002435	no_significant_change	1	22850	0.9762	10139	-3.5286	3458	2.6922	7008	4.0069	2245
1903	PA_chr01_G003202	535873	18	Belongs to the TRAFAC class dynamin-like GTPase superfamily. Dynamin Fzo YdjA family		Dynamin family	OG0007003	no_significant_change	1	9438	1.837	3558	3.542	3432	-4.9477	545	-4.1625	1903
1904	PA_chr01_G003205	1762	1	Belongs to the peptidase A1 family		Xylanase inhibitor N-terminal;Xylanase inhibitor C-terminal	OG0000706	contracted	3.33858e-05	50426	2.0615	2621	-0.5558	17200	1.1397	16649	-1.4362	13956
1905	PA_chr01_G003206	1885	4	Reticulon-like protein		Reticulon	OG0000667	no_significant_change	0.000353638	7272	1.2992	7272
1906	PA_chr01_G003207	129799	2	High-affinity nickel-transport family protein		Cytochrome C biogenesis protein transmembrane region	OG0004123	no_significant_change	1	15464	1.434	6173	5.6072	809	-2.6019	7468	-4.7594	1014
1907	PA_chr01_G003209	1521	2	E3 ubiquitin-protein ligase		Zinc finger, C3HC4 type (RING finger)	OG0031800	no_significant_change		54038	1.7925	3800	0.6339	16547	-1.4172	14690	0.6651	19001
1908	PA_chr01_G003210	416049	14	Glucose-inhibited division family A protein		GidA associated domain;Glucose inhibited division protein A	OG0005835	no_significant_change	1	14866	1.7445	4079	-3.7988	2885	-3.0016	5439	-3.9184	2463
1909	PA_chr01_G003213	1122	2	glutathione s-transferase		Glutathione S-transferase, C-terminal domain;Glutathione S-transferase, N-terminal domain	OG0000054	no_significant_change	1	56220	1.0402	9549	-0.6343	16543	1.6601	12970	0.9712	17158
1910	PA_chr01_G003215	8905	2	Glutelin type-A			OG0001035	no_significant_change	0.00982128	26038	1.303	7239	2.3391	6951	-3.1811	4609	-2.6481	7239
1911	PA_chr01_G003216	5438	1	SWIM zinc finger family protein			OG0012704	no_significant_change	1	28320	1.303	7239	2.3391	6951	-3.1811	4609	-2.1832	9521
1912	PA_chr01_G003217	1310	2	Glutathione S-transferase, C-terminal domain		Glutathione S-transferase, C-terminal domain;Glutathione S-transferase, N-terminal domain	OG0000054	no_significant_change	0.715712	67555	0.9476	10402	0.6336	16550	-0.4314	20341	0.3982	20262
1913	PA_chr01_G003218	995	1	glutathione s-transferase		Glutathione S-transferase, N-terminal domain;Glutathione S-transferase, C-terminal domain	OG0000054	no_significant_change	1	22167	1.3872	6546	3.747	2991	3.52	3209	2.2028	9421
1914	PA_chr01_G003219	1293	2	glutathione s-transferase		Glutathione S-transferase, C-terminal domain;Glutathione S-transferase, N-terminal domain	OG0000054	no_significant_change	1	69023	0.6735	13014	-0.4898	17716	0.7881	18818	0.5724	19475
1915	PA_chr01_G003220	1303	2	Glutathione S-transferase, C-terminal domain		Glutathione S-transferase, C-terminal domain;Glutathione S-transferase, N-terminal domain	OG0000054	no_significant_change	1	47400	1.0725	9252	-2.1438	7680	-0.7483	19036	-1.8362	11432
1916	PA_chr01_G003221	585	1	Promotes mitochondrial protein synthesis. May act as a fidelity factor of the translation reaction, by catalyzing a one- codon backward translocation of tRNAs on improperly translocated ribosomes. Binds to mitochondrial ribosomes in a GTP-dependent manner						59680	0.6735	13014	-0.1485	19947	-1.7967	12051	1.3311	14668
1917	PA_chr01_G003222	1723	2	Glutathione S-transferase, N-terminal domain		Glutathione S-transferase, C-terminal domain	OG0000054	no_significant_change	1	71518	1.0272	9669	-0.0456	20236	-0.2661	20791	-0.2155	20822
1918	PA_chr01_G003223	298751	2	glutathione s-transferase		Glutathione S-transferase, C-terminal domain;Glutathione S-transferase, N-terminal domain	OG0000054	no_significant_change	1	22750	1.4464	6079	-2.9002	5102	-2.9755	5558	2.9168	6011
1919	PA_chr01_G003224	1510	2	glutathione s-transferase		Glutathione S-transferase, N-terminal domain;Glutathione S-transferase, C-terminal domain	OG0000054	no_significant_change	1	47470	0.7515	12276	1.5541	10245	-2.0956	10225	1.3231	14724
1920	PA_chr01_G003225	3124	3	Chaperone protein dnaJ 8			OG0001297	no_significant_change	1	51797	0.9057	10809	0.6509	16410	-2.087	10270	-1.3862	14308
1921	PA_chr01_G003226	1910	2	glutathione s-transferase		Glutathione S-transferase, N-terminal domain;Glutathione S-transferase, C-terminal domain	OG0000054	no_significant_change	1	11576	0.825	11576
1922	PA_chr01_G003227	1810	2	glutathione s-transferase		Glutathione S-transferase, N-terminal domain;Glutathione S-transferase, C-terminal domain	OG0000054	no_significant_change	1	5449	1.5338	5449
1923	PA_chr01_G003228	194140	2	Glutathione S-transferase, N-terminal domain		Glutathione S-transferase, N-terminal domain;Glutathione S-transferase, C-terminal domain	OG0000054	no_significant_change	1	16419	2.6442	1293	3.1013	4490	-3.202	4520	2.8938	6116
1924	PA_chr01_G003229	1411	2	glutathione s-transferase		Glutathione S-transferase, N-terminal domain;Glutathione S-transferase, C-terminal domain	OG0000054	no_significant_change	1	49239	1.9101	3214	0.8301	14940	1.3183	15387	1.1804	15698
1925	PA_chr01_G003230	1461	2	glutathione s-transferase		Glutathione S-transferase, N-terminal domain;Glutathione S-transferase, C-terminal domain	OG0000054	no_significant_change	1	58869	1.3109	7171	-0.3964	18454	-1.304	15494	0.8786	17750
1926	PA_chr01_G003231	1654	2	glutathione s-transferase		Glutathione S-transferase, N-terminal domain;Glutathione S-transferase, C-terminal domain	OG0000054	no_significant_change	1	68475	0.5379	14285	0.5136	17526	0.7101	19226	0.9281	17438
1927	PA_chr01_G003232	86126	3	glutathione s-transferase		Glutathione S-transferase, N-terminal domain;Glutathione S-transferase, C-terminal domain	OG0000054	no_significant_change	0.00438615	31320	1.1889	8207	-3.1674	4312	2.107	10156	2.355	8645
1928	PA_chr01_G003233	1347	2	glutathione s-transferase		Glutathione S-transferase, N-terminal domain;Glutathione S-transferase, C-terminal domain	OG0000054	no_significant_change	1	61540	0.9975	9944	-0.9527	13983	0.6082	19693	0.8504	17920
1929	PA_chr01_G003235	4851	1	F-box kelch-repeat protein			OG0020241	no_significant_change	1	44965	1.0826	9155	-1.0642	13155	-1.7169	12590	-2.0766	10065
1930	PA_chr01_G003236	1633	2	glutathione s-transferase		Glutathione S-transferase, N-terminal domain;Glutathione S-transferase, C-terminal domain	OG0000054	no_significant_change	1	61769	0.9682	10212	-0.4199	18269	0.7451	19051	-1.3967	14237
1931	PA_chr01_G003237	1105	1							45415	1.3411	6917	1.2258	12061	1.1753	16397	2.0809	10040
1932	PA_chr01_G003238	1166	2	Glutathione S-transferase, N-terminal domain		Glutathione S-transferase, N-terminal domain;Glutathione S-transferase, C-terminal domain	OG0000054	no_significant_change	1	49871	1.3411	6917	1.6254	9879	0.8718	18346	1.3223	14729
1933	PA_chr01_G003239	1202	2	glutathione s-transferase		Glutathione S-transferase, N-terminal domain;Glutathione S-transferase, C-terminal domain	OG0000054	no_significant_change	1	42487	1.0143	9784	-2.7929	5396	-1.1156	16811	-1.9989	10496
1934	PA_chr01_G003240	1595	2	glutathione s-transferase		Glutathione S-transferase, N-terminal domain;Glutathione S-transferase, C-terminal domain	OG0000054	no_significant_change	1	37257	1.3243	7063	1.2985	11647	-2.4842	8080	-2.0038	10467
1935	PA_chr01_G003241	4823	10	Subtilase family		Fibronectin type-III domain;Peptidase inhibitor I9;Subtilase family	OG0000005	no_significant_change		45817	1.5618	5259	1.8925	8726	-1.7914	12086	-0.5146	19746
1936	PA_chr01_G003242	956	2	Subtilisin-like protease		Subtilase family	OG0011326	no_significant_change	1	43398	1.1015	8984	2.7048	5677	-1.9465	11094	-0.8953	17643
1937	PA_chr01_G003243	6475	11	Subtilase family		Fibronectin type-III domain;Peptidase inhibitor I9;PA domain;Subtilase family	OG0000005	no_significant_change		49309	1.3094	7185	0.8821	14531	-1.8949	11429	-1.1136	16164
1938	PA_chr01_G003246	5854	11	subtilisin-like		Fibronectin type-III domain;Peptidase inhibitor I9;Subtilase family	OG0000005	no_significant_change		42326	0.6572	13167	1.4431	10833	-2.0462	10513	-2.528	7813
1939	PA_chr01_G003247	3666	1	DYW family of nucleic acid deaminases		DYW family of nucleic acid deaminases;PPR repeat family;PPR repeat	OG0000000	no_significant_change		46044	0.682	12937	2.1921	7504	1.2774	15675	2.1012	9928
1940	PA_chr01_G003249	7898	1	DYW family of nucleic acid deaminases		DYW family of nucleic acid deaminases;PPR repeat family;PPR repeat	OG0029702	no_significant_change		37750	0.6762	12992	-1.8505	8894	2.2712	9246	-2.7816	6618
1941	PA_chr01_G003250	1368	2							45287	1.1033	8968	-0.5065	17584	-2.2292	9471	-2.2367	9264
1942	PA_chr01_G003252	1830	1			TCP family transcription factor	OG0026054	no_significant_change	0.253179	48173	1.4782	5832	-0.871	14616	1.5694	13595	1.4128	14130
1943	PA_chr01_G003253	734	1	Methyltransferase domain			OG0012627	no_significant_change	6.68529e-11	46136	0.9459	10419	-1.0786	13056	-2.2546	9327	-1.5282	13334
1944	PA_chr01_G003254	1359	1			TCP family transcription factor				13649	0.6059	13649
1945	PA_chr01_G003255	4149	1	Pentatricopeptide repeat-containing protein		PPR repeat family;PPR repeat	OG0021467	no_significant_change	0.0259784	47424	1.1068	8936	0.7655	15461	1.7946	12063	1.9162	10964
1946	PA_chr01_G003256	33733	3	Myb-like protein X			OG0003946	no_significant_change	1	27604	0.9879	10034	-3.4498	3642	3.1733	4643	-2.2317	9285
1947	PA_chr01_G003259	679	1							48722	1.0789	9190	0.6689	16258	2.3273	8945	1.3831	14329
1948	PA_chr01_G003262	1346	1							63349	0.4284	15253	-0.8839	14515	0.8478	18489	-1.2686	15092
1949	PA_chr01_G003263	40691	7	Malate dehydrogenase		lactate/malate dehydrogenase, alpha/beta C-terminal domain;lactate/malate dehydrogenase, NAD binding domain	OG0001003	no_significant_change	1	15052	0.9058	10808	5.9352	616	-3.8514	2164	-4.4259	1464
1950	PA_chr01_G003265	215631	12	Pgr5-like			OG0005771	no_significant_change		17572	1.7209	4215	-3.0739	4573	-2.9823	5528	3.632	3256
1951	PA_chr01_G003268	30776	4	Ribosomal S17		Ribosomal S17	OG0002202	no_significant_change	1	19396	1.3831	6577	-2.8088	5360	-3.1819	4607	3.771	2852
1952	PA_chr01_G003269	3081	2	Benzyl alcohol		Transferase family	OG0022491	no_significant_change		54337	0.6718	13030	-0.8365	14885	-1.876	11542	-1.3002	14880
1953	PA_chr01_G003270	3523	1				OG0011276	no_significant_change	1	60165	0.906	10806	-0.6659	16284	1.3201	15374	-0.8868	17701
1954	PA_chr01_G003271	2735	2	Benzyl alcohol		Transferase family	OG0031802	no_significant_change		34415	0.9794	10109	1.8852	8754	2.7488	6707	-2.3167	8845
1955	PA_chr01_G003274	2898	2	Belongs to the ubiquitin-conjugating enzyme family		Ubiquitin-conjugating enzyme	OG0000360	no_significant_change	1	52968	1.213	7992	-0.5301	17398	1.0496	17255	-2.0279	10323
1956	PA_chr01_G003275	7646	5	Inorganic pyrophosphatase		Putative Phosphatase	OG0043724	no_significant_change		16957	0	16957
1957	PA_chr01_G003277	773	1	Cytochrome p450			OG0015375	no_significant_change	1	16957	0	16957
1958	PA_chr01_G003278	455	1				OG0020242	no_significant_change	1	16957	0	16957
1959	PA_chr01_G003279	4319	2	DYW family of nucleic acid deaminases		DYW family of nucleic acid deaminases;PPR repeat family;PPR repeat	OG0010711	no_significant_change		60629	0.8221	11604	-1.1147	12796	0.7662	18941	-0.9512	17288
1960	PA_chr01_G003280	3936	1	DYW family of nucleic acid deaminases		DYW family of nucleic acid deaminases;PPR repeat family;PPR repeat	OG0024752	no_significant_change		54500	0.9519	10364	-0.5935	16880	2.0734	10335	1.006	16921
1961	PA_chr01_G003281	47287	6	ankyrin repeat family protein		Ankyrin repeats (many copies);Ankyrin repeats (3 copies)	OG0005179	no_significant_change	1	29414	1.576	5163	-2.2516	7291	2.1851	9720	2.6477	7240
1962	PA_chr01_G003282	723	1							40373	1.576	5163	-1.5086	10486	1.4145	14709	2.0854	10015
1963	PA_chr01_G003283	73564	10	Belongs to the OSBP family		Oxysterol-binding protein	OG0005171	no_significant_change		29939	1.6343	4773	2.0011	8256	2.1532	9885	2.6954	7025
1964	PA_chr01_G003284	13149	10	zinc finger			OG0005432	no_significant_change	0.168146	40529	1.23	7852	1.2422	11968	2.647	7230	-1.5063	13479
1965	PA_chr01_G003285	3568	1	Pentatricopeptide repeat-containing protein		PPR repeat family;PPR repeat	OG0010284	no_significant_change		41326	1.3122	7163	1.7024	9526	-1.727	12523	1.7215	12114
1966	PA_chr01_G003286	2624	1	Pentatricopeptide repeat-containing protein		PPR repeat family;PPR repeat	OG0026055	no_significant_change	1	33005	1.1691	8385	1.1804	12351	3.1306	4843	-2.6067	7426
1967	PA_chr01_G003287	12008	4	Alcohol dehydrogenase GroES-like domain		Alcohol dehydrogenase GroES-like domain	OG0014640	no_significant_change		32391	0.9542	10341	1.6676	9691	-2.7003	6963	-3.0584	5396
1968	PA_chr01_G003288	1496	1	Pentatricopeptide repeat-containing protein		PPR repeat family;PPR repeat				16957	0	16957
1969	PA_chr01_G003289	31296	2	BTB POZ domain-containing protein	5	BTB/POZ domain	OG0002899	no_significant_change	0.917031	25518	1.0837	9144	-1.484	10617	-3.4294	3555	4.0233	2202
1970	PA_chr01_G003291	350212	9	NmrA-like family		NmrA-like family	OG0005344	no_significant_change		7596	1.584	5112	-6.3623	446	4.149	1521	5.3078	517
1971	PA_chr01_G003298	6473	2				OG0004991	no_significant_change	1	48735	0.9121	10746	0.5516	17232	2.0691	10360	-2.0153	10397
1972	PA_chr01_G003299	7180	2				OG0004991	no_significant_change	1	39442	1.7514	4044	1.5262	10404	1.834	11808	1.5514	13186
1973	PA_chr01_G003301	202211	10	Protein of unknown function (DUF3727)		Protein of unknown function (DUF3727)	OG0010215	no_significant_change		8586	2.4545	1637	4.4299	1845	3.5933	2957	-4.0492	2147
1974	PA_chr01_G003302	1181	1			Protein of unknown function (DUF 659)	OG0014811	no_significant_change	1	15230	0.4312	15230
1975	PA_chr01_G003303	891	1	Histone H3		Core histone H2A/H2B/H3/H4	OG0000094	no_significant_change	1	52664	0.6209	13510	1.4316	10902	1.7737	12203	-1.1295	16049
1976	PA_chr01_G003313	1050	1	Histone H3		Core histone H2A/H2B/H3/H4	OG0000094	no_significant_change	1	33704	1.14	8647	3.1098	4471	2.1722	9791	-1.9454	10795
1977	PA_chr01_G003314	1273	1	Histone H3		Core histone H2A/H2B/H3/H4	OG0000094	no_significant_change	1	35845	1.2144	7980	2.5422	6208	1.8353	11801	-2.1156	9856
1978	PA_chr01_G003316	1582	1	Histone H3		Core histone H2A/H2B/H3/H4	OG0000094	no_significant_change	1	24892	1.428	6221	2.5114	6321	-3.5272	3188	-2.257	9162
1979	PA_chr01_G003319	4611	7	ACT domain		ACT domain	OG0000299	no_significant_change	1	29814	1.0956	9036	2.6983	5705	-2.8143	6357	-2.3402	8716
1980	PA_chr01_G003323	605	1				OG0043725	no_significant_change		60870	0.893	10927	0.2613	19389	-1.2148	16114	-1.3664	14440
1981	PA_chr01_G003324	20061	14	E3 ubiquitin-protein ligase		HECT-domain (ubiquitin-transferase)	OG0004404	no_significant_change	0.131125	45591	0.9164	10704	1.4556	10770	1.6206	13237	-1.932	10880
1982	PA_chr01_G003360	242051	8	Pentatricopeptide repeat-containing protein		Pentatricopeptide repeat domain;PPR repeat family;PPR repeat	OG0007903	no_significant_change		18368	0.7944	11865	4.652	1572	-3.816	2255	-3.8348	2676
1983	PA_chr01_G003361	2072	1	Belongs to the universal ribosomal protein uS9 family		Ribosomal protein S9/S16	OG0002093	no_significant_change	1	46398	0.5602	14079	1.2311	12033	-1.7676	12246	-2.4819	8040
1984	PA_chr01_G003362	778	1				OG0022452	no_significant_change	0.216636	54777	0.8675	11171	2.2855	7156	-0.6594	19466	0.9967	16984
1985	PA_chr01_G003365	5248	2	Sugar (and other) transporter		Sugar (and other) transporter	OG0000678	no_significant_change	1	41743	1.0656	9312	1.5567	10231	-1.9893	10836	-1.8476	11364
1986	PA_chr01_G003366	7327	10	Polyamine oxidase		Flavin containing amine oxidoreductase	OG0002343	no_significant_change	1	48368	1.2301	7851	0.6432	16471	1.6569	12992	-1.9	11054
1987	PA_chr01_G003367	325233	13	WD repeat-containing protein		WD domain, G-beta repeat	OG0007544	no_significant_change		15919	0.7753	12046	5.3647	955	4.8332	637	3.9884	2281
1988	PA_chr01_G003370	489	1							51972	0.6341	13383	1.3953	11094	1.2735	15695	1.7708	11800
1989	PA_chr01_G003373	342119	13				OG0008260	no_significant_change		16725	1.5521	5323	4.223	2140	3.0877	5046	-3.3533	4216
1990	PA_chr01_G003374	721	1				OG0010594	no_significant_change	1	56811	1.582	5123	-0.5804	16993	0.941	17932	-1.0279	16763
1991	PA_chr01_G003377	9781	8	Belongs to the short-chain dehydrogenases reductases (SDR) family		short chain dehydrogenase	OG0000784	no_significant_change	1	48266	1.3205	7093	-1.2346	12013	-1.6192	13245	-1.1483	15915
1992	PA_chr01_G003381	248340	13				OG0006290	no_significant_change		21056	1.4514	6035	3.3501	3868	-2.8571	6149	3.1438	5004
1993	PA_chr01_G003385	1855	1	disease resistance protein		NB-ARC domain	OG0001157	no_significant_change		57178	0.6664	13082	1.1036	12878	-1.4385	14539	1.0396	16679
1994	PA_chr01_G003386	841	2	glutathione s-transferase		Glutathione S-transferase, N-terminal domain	OG0000054	no_significant_change	1	55288	0.7208	12569	0.8412	14846	1.9112	11317	-1.0581	16556
1995	PA_chr01_G003387	1659	1				OG0018480	no_significant_change	1	59446	0.5623	14059	1.1122	12816	-1.0768	17072	-1.21	15499
1996	PA_chr01_G003388	4548	4	TMV resistance protein N-like		Leucine rich repeat;TIR domain;NB-ARC domain	OG0002074	no_significant_change	0.000379599	62715	0.5623	14059	0.6944	16054	-0.8856	18263	-1.3814	14339
1997	PA_chr01_G003389	13203	11	Component of the eukaryotic translation initiation factor 3 (eIF-3) complex, which is involved in protein synthesis and, together with other initiation factors, stimulates binding of mRNA and methionyl-tRNAi to the 40S ribosome		Eukaryotic translation initiation factor eIF2A;RNA recognition motif. (a.k.a. RRM, RBD, or RNP domain)	OG0005021	no_significant_change	0.77216	22003	0.6316	13408	5.2664	1023	-3.1555	4724	3.772	2848
1998	PA_chr01_G003390	841	1	Ribonuclease H protein			OG0018502	no_significant_change	0.00186825	59964	0.6299	13424	0.9797	13775	0.7845	18837	1.4407	13928
[truncated: 37,513 more rows]
