# Supplementary material for: 1000 conifer genomes: Genome innovation, organisation and diversity
Source: Research Square preprint supplement (doi:10.21203/rs.3.rs-6502828/v1), 2025-05-26
Supplement: Supplementary file 3 [file b8ef225de341e2e979efcc72.xlsx]

## Sheet: Sheet3
8995 set: Gene ids for genes with signs of positive selection
====================================================
This file contains the combined set of genes under positive selection	either contrasting or similar between the north and south samples set.
To separate into the two gene sets:
- contrasting selection signal between north and south (4202 genes) extract rows where the second column == either `xpehh` or `xpehh	ihs`
- similar selection signal for north and south (7769 genes) extract rows where the second column == either `ihs` or `xpehh	ihs`
Code document classifying genes as contrasting or similar: `code/notebooks/classify_selected_xpehh-ihs_genes.html`
679 set: Gene ids for selected genes all ~1000 P.abies samples
====================================================
This file contains the gene ids for the selected genes in the PCadapt analysis.
Selection method: PCadapt
Type of selection: Local adaptation
Number of selected genes: 679
Genes were classified as under selection if they contained a 10kb window with a average score >= 3.23 selection score in the top 1% of the distribution (one sided)
319 set: Gene ids for genes intersecting gene between the 679 and 8995 gene sets
========================================================================
This file contains the gene ids for the selected genes in the PCadapt (set of 679 genes) and XP-EHH/iHS analysis (set of 8995 genes).
Number of selected genes: 319

## Sheet: gene-id_selected-genes_set-8995
PA_chr01_G000009	ihs
PA_chr01_G000012	xpehh
PA_chr01_G000016	xpehh
PA_chr01_G000021	xpehh,ihs
PA_chr01_G000050	xpehh
PA_chr01_G000057	xpehh,ihs
PA_chr01_G000061	xpehh,ihs
PA_chr01_G000065	xpehh,ihs
PA_chr01_G000066	xpehh,ihs
PA_chr01_G000077	ihs
PA_chr01_G000099	ihs
PA_chr01_G000100	xpehh,ihs
PA_chr01_G000102	ihs
PA_chr01_G000103	ihs
PA_chr01_G000105	ihs
PA_chr01_G000108	xpehh,ihs
PA_chr01_G000111	xpehh,ihs
PA_chr01_G000117	ihs
PA_chr01_G000130	ihs
PA_chr01_G000136	xpehh,ihs
PA_chr01_G000137	xpehh,ihs
PA_chr01_G000148	ihs
PA_chr01_G000161	ihs
PA_chr01_G000165	ihs
PA_chr01_G000190	ihs
PA_chr01_G000225	ihs
PA_chr01_G000258	xpehh,ihs
PA_chr01_G000264	ihs
PA_chr01_G000270	ihs
PA_chr01_G000327	ihs
PA_chr01_G000331	ihs
PA_chr01_G000335	ihs
PA_chr01_G000337	xpehh,ihs
PA_chr01_G000373	ihs
PA_chr01_G000376	ihs
PA_chr01_G000379	ihs
PA_chr01_G000393	xpehh
PA_chr01_G000405	ihs
PA_chr01_G000427	ihs
PA_chr01_G000428	xpehh,ihs
PA_chr01_G000434	ihs
PA_chr01_G000435	ihs
PA_chr01_G000442	ihs
PA_chr01_G000444	xpehh,ihs
PA_chr01_G000448	ihs
PA_chr01_G000451	xpehh,ihs
PA_chr01_G000452	ihs
PA_chr01_G000455	ihs
PA_chr01_G000467	ihs
PA_chr01_G000476	ihs
PA_chr01_G000484	ihs
PA_chr01_G000485	xpehh,ihs
PA_chr01_G000488	xpehh,ihs
PA_chr01_G000490	xpehh,ihs
PA_chr01_G000499	xpehh,ihs
PA_chr01_G000533	xpehh,ihs
PA_chr01_G000538	xpehh,ihs
PA_chr01_G000547	ihs
PA_chr01_G000551	ihs
PA_chr01_G000567	ihs
PA_chr01_G000568	ihs
PA_chr01_G000574	ihs
PA_chr01_G000579	xpehh,ihs
PA_chr01_G000592	ihs
PA_chr01_G000593	ihs
PA_chr01_G000594	ihs
PA_chr01_G000601	ihs
PA_chr01_G000620	ihs
PA_chr01_G000628	xpehh,ihs
PA_chr01_G000647	ihs
PA_chr01_G000690	ihs
PA_chr01_G000698	ihs
PA_chr01_G000720	ihs
PA_chr01_G000725	ihs
PA_chr01_G000737	ihs
PA_chr01_G000741	xpehh,ihs
PA_chr01_G000747	ihs
PA_chr01_G000749	xpehh
PA_chr01_G000750	ihs
PA_chr01_G000756	xpehh,ihs
PA_chr01_G000762	ihs
PA_chr01_G000764	ihs
PA_chr01_G000766	ihs
PA_chr01_G000786	ihs
PA_chr01_G000793	ihs
PA_chr01_G000834	ihs
PA_chr01_G000855	ihs
PA_chr01_G000865	ihs
PA_chr01_G000875	ihs
PA_chr01_G000883	ihs
PA_chr01_G000890	ihs
PA_chr01_G000958	ihs
PA_chr01_G001023	xpehh,ihs
PA_chr01_G001027	ihs
PA_chr01_G001033	xpehh,ihs
PA_chr01_G001036	ihs
PA_chr01_G001037	ihs
PA_chr01_G001038	xpehh,ihs
PA_chr01_G001053	xpehh,ihs
PA_chr01_G001054	ihs
PA_chr01_G001082	ihs
PA_chr01_G001085	xpehh,ihs
PA_chr01_G001102	ihs
PA_chr01_G001114	ihs
PA_chr01_G001116	ihs
PA_chr01_G001127	ihs
PA_chr01_G001147	ihs
PA_chr01_G001156	ihs
PA_chr01_G001173	ihs
PA_chr01_G001174	ihs
PA_chr01_G001201	ihs
PA_chr01_G001247	xpehh
PA_chr01_G001276	ihs
PA_chr01_G001285	xpehh
PA_chr01_G001286	xpehh
PA_chr01_G001317	xpehh,ihs
PA_chr01_G001321	ihs
PA_chr01_G001322	ihs
PA_chr01_G001335	ihs
PA_chr01_G001337	xpehh,ihs
PA_chr01_G001338	ihs
PA_chr01_G001375	ihs
PA_chr01_G001378	xpehh
PA_chr01_G001385	ihs
PA_chr01_G001389	xpehh,ihs
PA_chr01_G001392	ihs
PA_chr01_G001393	xpehh,ihs
PA_chr01_G001397	ihs
PA_chr01_G001402	ihs
PA_chr01_G001403	xpehh
PA_chr01_G001416	xpehh,ihs
PA_chr01_G001429	ihs
PA_chr01_G001434	ihs
PA_chr01_G001435	ihs
PA_chr01_G001440	xpehh
PA_chr01_G001450	xpehh
PA_chr01_G001451	xpehh,ihs
PA_chr01_G001452	ihs
PA_chr01_G001463	ihs
PA_chr01_G001467	ihs
PA_chr01_G001470	ihs
PA_chr01_G001479	ihs
PA_chr01_G001482	ihs
PA_chr01_G001486	xpehh
PA_chr01_G001491	xpehh
PA_chr01_G001497	ihs
PA_chr01_G001501	ihs
PA_chr01_G001521	xpehh,ihs
PA_chr01_G001535	ihs
PA_chr01_G001536	ihs
PA_chr01_G001543	xpehh,ihs
PA_chr01_G001553	ihs
PA_chr01_G001601	xpehh,ihs
PA_chr01_G001603	xpehh,ihs
PA_chr01_G001612	ihs
PA_chr01_G001613	ihs
PA_chr01_G001614	ihs
PA_chr01_G001616	ihs
PA_chr01_G001625	ihs
PA_chr01_G001650	ihs
PA_chr01_G001681	ihs
PA_chr01_G001723	ihs
PA_chr01_G001769	ihs
PA_chr01_G001770	xpehh,ihs
PA_chr01_G001776	ihs
PA_chr01_G001782	xpehh,ihs
PA_chr01_G001788	ihs
PA_chr01_G001791	xpehh,ihs
PA_chr01_G001795	ihs
PA_chr01_G001797	xpehh,ihs
PA_chr01_G001799	ihs
PA_chr01_G001803	ihs
PA_chr01_G001807	xpehh,ihs
PA_chr01_G001815	ihs
PA_chr01_G001824	xpehh,ihs
PA_chr01_G001830	ihs
PA_chr01_G001838	ihs
PA_chr01_G001843	xpehh
PA_chr01_G001861	ihs
PA_chr01_G002302	ihs
PA_chr01_G002306	ihs
PA_chr01_G002307	ihs
PA_chr01_G002308	ihs
PA_chr01_G002312	xpehh
PA_chr01_G002324	xpehh
PA_chr01_G002371	ihs
PA_chr01_G002372	xpehh,ihs
PA_chr01_G002383	ihs
PA_chr01_G002385	xpehh,ihs
PA_chr01_G002395	xpehh,ihs
PA_chr01_G002408	ihs
PA_chr01_G002418	ihs
PA_chr01_G002419	ihs
PA_chr01_G002432	xpehh
PA_chr01_G002433	xpehh,ihs
PA_chr01_G002440	xpehh,ihs
PA_chr01_G002448	ihs
PA_chr01_G002469	xpehh,ihs
PA_chr01_G002472	ihs
PA_chr01_G002477	ihs
PA_chr01_G002481	ihs
PA_chr01_G002483	ihs
PA_chr01_G002499	ihs
PA_chr01_G002501	xpehh,ihs
PA_chr01_G002502	ihs
PA_chr01_G002533	xpehh,ihs
PA_chr01_G002534	ihs
PA_chr01_G002544	ihs
PA_chr01_G002545	xpehh,ihs
PA_chr01_G002564	ihs
PA_chr01_G002589	xpehh
PA_chr01_G002598	xpehh,ihs
PA_chr01_G002600	xpehh
PA_chr01_G002620	xpehh,ihs
PA_chr01_G002627	xpehh,ihs
PA_chr01_G002635	xpehh,ihs
PA_chr01_G002637	ihs
PA_chr01_G002642	ihs
PA_chr01_G002652	xpehh,ihs
PA_chr01_G002667	ihs
PA_chr01_G002675	ihs
PA_chr01_G002684	xpehh,ihs
PA_chr01_G002692	ihs
PA_chr01_G002700	ihs
PA_chr01_G002702	ihs
PA_chr01_G002704	xpehh,ihs
PA_chr01_G002707	xpehh,ihs
PA_chr01_G002710	xpehh,ihs
PA_chr01_G002724	ihs
PA_chr01_G002736	ihs
PA_chr01_G002740	ihs
PA_chr01_G002747	xpehh,ihs
PA_chr01_G002756	ihs
PA_chr01_G002763	ihs
PA_chr01_G002764	ihs
PA_chr01_G002766	ihs
PA_chr01_G002783	ihs
PA_chr01_G002787	ihs
PA_chr01_G002790	xpehh
PA_chr01_G002810	ihs
PA_chr01_G002819	xpehh
PA_chr01_G002829	ihs
PA_chr01_G002851	xpehh,ihs
PA_chr01_G002861	xpehh,ihs
PA_chr01_G002862	ihs
PA_chr01_G002871	xpehh,ihs
PA_chr01_G002875	ihs
PA_chr01_G002876	xpehh,ihs
PA_chr01_G002878	xpehh
PA_chr01_G002895	xpehh,ihs
PA_chr01_G002896	xpehh,ihs
PA_chr01_G002925	ihs
PA_chr01_G002930	ihs
PA_chr01_G002959	ihs
PA_chr01_G002968	ihs
PA_chr01_G002971	xpehh,ihs
PA_chr01_G002973	ihs
PA_chr01_G002978	ihs
PA_chr01_G002991	ihs
PA_chr01_G002997	ihs
PA_chr01_G002998	ihs
PA_chr01_G002999	xpehh,ihs
PA_chr01_G003000	ihs
PA_chr01_G003002	ihs
PA_chr01_G003011	xpehh
PA_chr01_G003013	ihs
PA_chr01_G003015	ihs
PA_chr01_G003020	ihs
PA_chr01_G003021	ihs
PA_chr01_G003022	xpehh
PA_chr01_G003023	ihs
PA_chr01_G003028	ihs
PA_chr01_G003032	ihs
PA_chr01_G003033	ihs
PA_chr01_G003036	ihs
PA_chr01_G003039	xpehh,ihs
PA_chr01_G003041	ihs
PA_chr01_G003044	xpehh,ihs
PA_chr01_G003050	ihs
PA_chr01_G003063	xpehh,ihs
PA_chr01_G003064	ihs
PA_chr01_G003072	ihs
PA_chr01_G003101	ihs
PA_chr01_G003107	ihs
PA_chr01_G003112	xpehh,ihs
PA_chr01_G003113	xpehh,ihs
PA_chr01_G003116	xpehh,ihs
PA_chr01_G003124	ihs
PA_chr01_G003132	ihs
PA_chr01_G003133	ihs
PA_chr01_G003138	xpehh
PA_chr01_G003142	xpehh,ihs
PA_chr01_G003143	xpehh,ihs
PA_chr01_G003147	ihs
PA_chr01_G003153	ihs
PA_chr01_G003154	xpehh,ihs
PA_chr01_G003168	ihs
PA_chr01_G003172	xpehh
PA_chr01_G003178	xpehh,ihs
PA_chr01_G003179	xpehh,ihs
PA_chr01_G003182	xpehh
PA_chr01_G003194	xpehh,ihs
PA_chr01_G003200	ihs
PA_chr01_G003202	ihs
PA_chr01_G003206	ihs
PA_chr01_G003207	xpehh
PA_chr01_G003210	ihs
PA_chr01_G003218	xpehh,ihs
PA_chr01_G003220	ihs
PA_chr01_G003239	xpehh,ihs
PA_chr01_G003249	ihs
PA_chr01_G003259	ihs
PA_chr01_G003263	xpehh
PA_chr01_G003265	ihs
PA_chr01_G003268	ihs
PA_chr01_G003286	xpehh
PA_chr01_G003287	xpehh,ihs
PA_chr01_G003288	ihs
PA_chr01_G003289	ihs
PA_chr01_G003291	xpehh,ihs
PA_chr01_G003301	xpehh,ihs
PA_chr01_G003314	xpehh
PA_chr01_G003319	xpehh
PA_chr01_G003360	xpehh
PA_chr01_G003367	xpehh,ihs
PA_chr01_G003373	xpehh,ihs
PA_chr01_G003381	ihs
PA_chr01_G003389	xpehh
PA_chr01_G003401	ihs
PA_chr01_G003410	ihs
PA_chr01_G003420	ihs
PA_chr01_G003422	xpehh,ihs
PA_chr01_G003426	xpehh,ihs
PA_chr01_G003462	ihs
PA_chr01_G003466	xpehh,ihs
PA_chr01_G003488	ihs
PA_chr01_G003490	ihs
PA_chr01_G003491	xpehh,ihs
PA_chr01_G003497	ihs
PA_chr01_G003502	ihs
PA_chr01_G003503	ihs
PA_chr01_G003504	ihs
PA_chr01_G003505	xpehh,ihs
PA_chr01_G003506	ihs
PA_chr01_G003507	ihs
PA_chr01_G003508	ihs
PA_chr01_G003513	xpehh
PA_chr01_G003515	xpehh,ihs
PA_chr01_G003520	xpehh,ihs
PA_chr01_G003524	ihs
PA_chr01_G003525	ihs
PA_chr01_G003526	ihs
PA_chr01_G003535	ihs
PA_chr01_G003550	ihs
PA_chr01_G003567	xpehh
PA_chr01_G003571	xpehh
PA_chr01_G003572	xpehh
PA_chr01_G003581	xpehh
PA_chr01_G003585	ihs
PA_chr01_G003588	xpehh,ihs
PA_chr01_G003594	ihs
PA_chr01_G003607	ihs
PA_chr01_G003609	ihs
PA_chr01_G003610	xpehh,ihs
PA_chr01_G003635	xpehh,ihs
PA_chr01_G003638	xpehh,ihs
PA_chr01_G003654	ihs
PA_chr01_G003656	xpehh,ihs
PA_chr01_G003660	xpehh,ihs
PA_chr01_G003666	xpehh,ihs
PA_chr01_G003669	xpehh,ihs
PA_chr01_G003672	xpehh,ihs
PA_chr01_G003675	xpehh,ihs
PA_chr01_G003677	ihs
PA_chr01_G003679	xpehh
PA_chr01_G003687	xpehh
PA_chr01_G003691	xpehh
PA_chr01_G003693	xpehh,ihs
PA_chr01_G003695	xpehh,ihs
PA_chr01_G003702	ihs
PA_chr01_G003709	xpehh
PA_chr01_G003711	xpehh,ihs
PA_chr01_G003714	xpehh,ihs
PA_chr01_G003715	ihs
PA_chr01_G003727	xpehh,ihs
PA_chr01_G003730	xpehh,ihs
PA_chr01_G003738	ihs
PA_chr01_G003743	xpehh,ihs
PA_chr01_G003745	xpehh
PA_chr01_G003752	ihs
PA_chr01_G003761	xpehh,ihs
PA_chr01_G003765	ihs
PA_chr01_G003767	ihs
PA_chr01_G003774	xpehh,ihs
PA_chr01_G003776	xpehh
PA_chr01_G003780	ihs
PA_chr01_G003786	xpehh,ihs
PA_chr01_G003794	xpehh,ihs
PA_chr01_G003798	xpehh,ihs
PA_chr01_G003803	xpehh,ihs
PA_chr01_G003804	xpehh,ihs
PA_chr01_G003816	xpehh,ihs
PA_chr01_G003821	xpehh,ihs
PA_chr01_G003824	xpehh,ihs
PA_chr01_G003856	xpehh
PA_chr01_G003857	xpehh,ihs
PA_chr01_G003862	ihs
PA_chr01_G003866	xpehh,ihs
PA_chr01_G003872	xpehh,ihs
PA_chr01_G003885	xpehh,ihs
PA_chr01_G003886	xpehh,ihs
PA_chr01_G003888	xpehh,ihs
PA_chr01_G003891	xpehh,ihs
PA_chr01_G003899	xpehh,ihs
PA_chr01_G003904	xpehh
PA_chr01_G003906	xpehh
PA_chr01_G003910	xpehh,ihs
PA_chr01_G003924	xpehh
PA_chr01_G003925	ihs
PA_chr01_G003938	ihs
PA_chr01_G003939	ihs
PA_chr01_G003940	ihs
PA_chr01_G003941	ihs
PA_chr01_G003944	ihs
PA_chr01_G003949	ihs
PA_chr01_G003954	ihs
PA_chr01_G003956	ihs
PA_chr01_G003959	ihs
PA_chr01_G003979	xpehh,ihs
PA_chr01_G003993	xpehh,ihs
PA_chr01_G003997	xpehh,ihs
PA_chr01_G004002	xpehh,ihs
PA_chr01_G004007	xpehh
PA_chr01_G004010	xpehh
PA_chr01_G004012	xpehh,ihs
PA_chr01_G004019	ihs
PA_chr01_G004021	xpehh
PA_chr01_G004026	xpehh
PA_chr01_G004029	ihs
PA_chr01_G004044	xpehh,ihs
PA_chr01_G004054	xpehh,ihs
PA_chr01_G004063	ihs
PA_chr01_G004064	xpehh,ihs
PA_chr01_G004069	xpehh
PA_chr01_G004071	ihs
PA_chr01_G004072	ihs
PA_chr01_G004075	ihs
PA_chr01_G004077	xpehh,ihs
PA_chr01_G004081	ihs
PA_chr01_G004084	xpehh,ihs
PA_chr01_G004085	ihs
PA_chr01_G004088	xpehh,ihs
PA_chr01_G004090	xpehh,ihs
PA_chr01_G004095	ihs
PA_chr01_G004098	ihs
PA_chr01_G004102	ihs
PA_chr01_G004105	xpehh,ihs
PA_chr01_G004106	ihs
PA_chr01_G004107	ihs
PA_chr01_G004139	ihs
PA_chr01_G004147	xpehh
PA_chr01_G004156	xpehh,ihs
PA_chr01_G004161	ihs
PA_chr01_G004188	ihs
PA_chr01_G004189	ihs
PA_chr01_G004206	xpehh,ihs
PA_chr01_G004207	ihs
PA_chr01_G004209	ihs
PA_chr01_G004213	xpehh,ihs
PA_chr01_G004216	xpehh,ihs
PA_chr01_G004217	ihs
PA_chr01_G004219	xpehh,ihs
PA_chr01_G004228	ihs
PA_chr01_G004229	ihs
PA_chr01_G004248	xpehh
PA_chr01_G004272	xpehh,ihs
PA_chr01_G004276	ihs
PA_chr01_G004280	xpehh,ihs
PA_chr01_G004281	xpehh,ihs
PA_chr01_G004283	xpehh
PA_chr01_G004286	xpehh,ihs
PA_chr01_G004302	ihs
PA_chr01_G004304	ihs
PA_chr01_G004306	ihs
PA_chr01_G004311	xpehh,ihs
PA_chr01_G004317	ihs
PA_chr01_G004320	xpehh
PA_chr01_G004322	xpehh,ihs
PA_chr01_G004325	xpehh,ihs
PA_chr01_G004335	ihs
PA_chr01_G004336	xpehh,ihs
PA_chr01_G004341	xpehh,ihs
PA_chr01_G004345	xpehh
PA_chr01_G004350	xpehh,ihs
PA_chr01_G004353	ihs
PA_chr01_G004357	xpehh,ihs
PA_chr01_G004366	ihs
PA_chr01_G004376	ihs
PA_chr01_G004385	xpehh,ihs
PA_chr01_G004388	ihs
PA_chr01_G004389	xpehh,ihs
PA_chr01_G004396	ihs
PA_chr01_G004398	xpehh,ihs
PA_chr01_G004400	ihs
PA_chr01_G004403	ihs
PA_chr01_G004442	xpehh,ihs
PA_chr01_G004447	xpehh
PA_chr01_G004449	ihs
PA_chr01_G004455	xpehh,ihs
PA_chr01_G004457	xpehh,ihs
PA_chr01_G004462	xpehh,ihs
PA_chr01_G004463	ihs
PA_chr01_G004464	ihs
PA_chr01_G004547	ihs
PA_chr01_G004549	ihs
PA_chr01_G004550	xpehh,ihs
PA_chr01_G004576	ihs
PA_chr01_G004588	ihs
PA_chr01_G004589	ihs
PA_chr01_G004593	xpehh
PA_chr01_G004598	ihs
PA_chr01_G004618	ihs
PA_chr01_G004620	xpehh,ihs
PA_chr01_G004621	xpehh
PA_chr01_G004633	ihs
PA_chr01_G004634	ihs
PA_chr01_G004638	xpehh,ihs
PA_chr01_G004646	xpehh,ihs
PA_chr01_G004649	xpehh,ihs
PA_chr01_G004653	xpehh,ihs
PA_chr01_G004655	xpehh,ihs
PA_chr01_G004656	xpehh
PA_chr01_G004660	xpehh,ihs
PA_chr01_G004665	ihs
PA_chr01_G004672	ihs
PA_chr01_G004681	xpehh,ihs
PA_chr01_G004688	xpehh,ihs
PA_chr01_G004689	xpehh,ihs
PA_chr01_G004694	xpehh,ihs
PA_chr01_G004705	xpehh,ihs
PA_chr01_G004706	ihs
PA_chr01_G004727	xpehh
PA_chr01_G004731	ihs
PA_chr01_G004755	ihs
PA_chr01_G004759	xpehh,ihs
PA_chr01_G004767	ihs
PA_chr01_G004768	xpehh,ihs
PA_chr01_G004769	xpehh
PA_chr01_G004779	xpehh,ihs
PA_chr01_G004787	xpehh
PA_chr01_G004790	ihs
PA_chr01_G004793	xpehh,ihs
PA_chr01_G004811	xpehh,ihs
PA_chr01_G004828	ihs
PA_chr01_G004831	ihs
PA_chr01_G004832	xpehh,ihs
PA_chr01_G004837	xpehh
PA_chr01_G004843	xpehh,ihs
PA_chr01_G004849	ihs
PA_chr01_G004852	xpehh,ihs
PA_chr01_G004858	ihs
PA_chr01_G004859	ihs
PA_chr01_G004881	ihs
PA_chr01_G004883	ihs
PA_chr01_G004911	xpehh,ihs
PA_chr01_G004912	ihs
PA_chr01_G004920	xpehh
PA_chr01_G004934	ihs
PA_chr01_G004936	xpehh,ihs
PA_chr01_G004948	xpehh,ihs
PA_chr01_G004952	xpehh,ihs
PA_chr01_G004983	xpehh,ihs
PA_chr01_G004984	xpehh
PA_chr01_G004986	ihs
PA_chr01_G005004	xpehh,ihs
PA_chr01_G005017	xpehh,ihs
PA_chr01_G005023	ihs
PA_chr01_G005029	xpehh,ihs
PA_chr01_G005042	ihs
PA_chr01_G005043	ihs
PA_chr01_G005046	xpehh
PA_chr01_G005054	ihs
PA_chr01_G005057	xpehh,ihs
PA_chr01_G005061	ihs
PA_chr01_G005067	ihs
PA_chr01_G005068	xpehh,ihs
PA_chr01_G005074	xpehh,ihs
PA_chr01_G005075	xpehh,ihs
PA_chr01_G005085	ihs
PA_chr01_G005086	ihs
PA_chr01_G005089	ihs
PA_chr01_G005095	xpehh,ihs
PA_chr01_G005096	ihs
PA_chr01_G005097	ihs
PA_chr01_G005098	ihs
PA_chr01_G005104	ihs
PA_chr01_G005119	xpehh
PA_chr01_G005124	xpehh,ihs
PA_chr01_G005125	ihs
PA_chr01_G005126	xpehh,ihs
PA_chr01_G005129	ihs
PA_chr01_G005134	ihs
PA_chr01_G005176	xpehh,ihs
PA_chr01_G005178	xpehh,ihs
PA_chr01_G005183	ihs
PA_chr01_G005204	ihs
PA_chr01_G005210	xpehh,ihs
PA_chr01_G005217	xpehh
PA_chr01_G005229	ihs
PA_chr01_G005320	xpehh,ihs
PA_chr01_G005323	ihs
PA_chr01_G005324	xpehh,ihs
PA_chr01_G005327	ihs
PA_chr01_G005331	ihs
PA_chr01_G005406	ihs
PA_chr01_G005440	ihs
PA_chr01_G005441	ihs
PA_chr01_G005455	ihs
PA_chr01_G005501	xpehh,ihs
PA_chr01_G005556	xpehh
PA_chr01_G005588	ihs
PA_chr01_G005597	xpehh,ihs
PA_chr01_G005600	ihs
PA_chr01_G005601	xpehh,ihs
PA_chr01_G005604	xpehh
PA_chr01_G005609	ihs
PA_chr01_G005619	ihs
PA_chr01_G005623	xpehh,ihs
PA_chr01_G005649	ihs
PA_chr01_G005655	xpehh,ihs
PA_chr01_G005656	xpehh,ihs
PA_chr01_G005730	ihs
PA_chr01_G005732	xpehh,ihs
PA_chr01_G005742	ihs
PA_chr01_G005753	ihs
PA_chr01_G005765	ihs
PA_chr01_G005770	ihs
PA_chr01_G005778	xpehh,ihs
PA_chr01_G005780	xpehh
PA_chr01_G005784	ihs
PA_chr01_G005786	ihs
PA_chr01_G005788	ihs
PA_chr01_G005794	ihs
PA_chr01_G005796	ihs
PA_chr01_G005820	ihs
PA_chr01_G005822	xpehh,ihs
PA_chr01_G005823	ihs
PA_chr01_G005825	ihs
PA_chr01_G005838	xpehh
PA_chr01_G005876	ihs
PA_chr01_G005883	ihs
PA_chr01_G005918	xpehh,ihs
PA_chr01_G005924	xpehh
PA_chr01_G005931	ihs
PA_chr01_G005934	xpehh,ihs
PA_chr01_G005937	xpehh,ihs
PA_chr01_G005965	ihs
PA_chr01_G005979	xpehh,ihs
PA_chr01_G005982	xpehh,ihs
PA_chr01_G005987	xpehh,ihs
PA_chr01_G005989	ihs
PA_chr01_G005996	ihs
PA_chr01_G006012	ihs
PA_chr01_G006027	xpehh,ihs
PA_chr01_G006031	ihs
PA_chr01_G006038	xpehh
PA_chr01_G006065	ihs
PA_chr01_G006067	xpehh,ihs
PA_chr01_G006071	ihs
PA_chr01_G006072	ihs
PA_chr01_G006105	xpehh,ihs
PA_chr01_G006108	xpehh,ihs
PA_chr01_G006111	xpehh,ihs
PA_chr01_G006122	xpehh,ihs
PA_chr01_G006132	ihs
PA_chr01_G006142	ihs
PA_chr01_G006148	ihs
PA_chr01_G006152	xpehh,ihs
PA_chr01_G006187	xpehh,ihs
PA_chr01_G006202	ihs
PA_chr01_G006203	xpehh,ihs
PA_chr01_G006206	xpehh
PA_chr01_G006245	xpehh
PA_chr01_G006247	ihs
PA_chr01_G006255	ihs
PA_chr01_G006259	ihs
PA_chr01_G006268	xpehh,ihs
PA_chr01_G006269	ihs
PA_chr01_G006282	ihs
PA_chr01_G006296	ihs
PA_chr01_G006318	ihs
PA_chr01_G006327	ihs
PA_chr01_G006342	ihs
PA_chr01_G006345	ihs
PA_chr01_G006353	ihs
PA_chr01_G006354	xpehh,ihs
PA_chr01_G006364	xpehh,ihs
PA_chr01_G006366	ihs
PA_chr01_G006367	xpehh,ihs
PA_chr01_G006388	ihs
PA_chr01_G006400	ihs
PA_chr01_G006401	xpehh
PA_chr01_G006405	ihs
PA_chr01_G006406	ihs
PA_chr01_G006410	xpehh
PA_chr01_G006414	ihs
PA_chr01_G006426	ihs
PA_chr01_G006427	xpehh
PA_chr01_G006435	xpehh,ihs
PA_chr01_G006445	xpehh,ihs
PA_chr01_G006449	ihs
PA_chr01_G006455	xpehh,ihs
PA_chr01_G006457	xpehh,ihs
PA_chr01_G006466	ihs
PA_chr01_G006469	ihs
PA_chr01_G006472	xpehh
PA_chr01_G006473	ihs
PA_chr01_G006476	xpehh
PA_chr01_G006477	xpehh
PA_chr01_G006478	xpehh
PA_chr01_G006479	xpehh
PA_chr01_G006481	xpehh,ihs
PA_chr01_G006483	xpehh
PA_chr01_G006485	xpehh,ihs
PA_chr01_G006486	xpehh,ihs
PA_chr01_G006491	xpehh
PA_chr01_G006499	ihs
PA_chr01_G006504	xpehh
PA_chr01_G006507	ihs
PA_chr01_G006514	ihs
PA_chr01_G006517	xpehh,ihs
PA_chr01_G006522	ihs
PA_chr01_G006527	ihs
PA_chr01_G006531	ihs
PA_chr01_G006532	ihs
PA_chr01_G006541	ihs
PA_chr01_G006551	ihs
PA_chr01_G006552	xpehh,ihs
PA_chr01_G006557	xpehh,ihs
PA_chr01_G006581	ihs
PA_chr01_G006585	ihs
PA_chr01_G006587	xpehh
PA_chr01_G006588	xpehh
PA_chr01_G006593	xpehh,ihs
PA_chr01_G006596	ihs
PA_chr01_G006599	ihs
PA_chr01_G006608	xpehh,ihs
PA_chr01_G006609	xpehh,ihs
PA_chr01_G006612	ihs
PA_chr01_G006614	xpehh,ihs
PA_chr01_G006617	ihs
PA_chr01_G006618	xpehh,ihs
PA_chr01_G006630	ihs
PA_chr01_G006638	ihs
PA_chr01_G006641	xpehh,ihs
PA_chr01_G006642	xpehh,ihs
PA_chr01_G006647	xpehh,ihs
PA_chr01_G006650	xpehh,ihs
PA_chr01_G006660	xpehh
PA_chr01_G006661	xpehh
PA_chr01_G006662	xpehh,ihs
PA_chr01_G006669	ihs
PA_chr01_G006671	ihs
PA_chr01_G006674	ihs
PA_chr01_G006692	xpehh,ihs
PA_chr01_G006699	xpehh
PA_chr01_G006702	ihs
PA_chr01_G006743	ihs
PA_chr01_G006745	ihs
PA_chr01_G006761	ihs
PA_chr01_G006765	ihs
PA_chr01_G006766	ihs
PA_chr01_G006782	xpehh,ihs
PA_chr01_G006786	ihs
PA_chr01_G006788	ihs
PA_chr01_G006790	ihs
PA_chr01_G006801	xpehh
PA_chr01_G006803	ihs
PA_chr01_G006819	ihs
PA_chr01_G006820	ihs
PA_chr01_G006822	xpehh,ihs
PA_chr01_G006824	ihs
PA_chr01_G006825	ihs
PA_chr01_G006826	ihs
PA_chr01_G006832	ihs
PA_chr01_G006836	xpehh,ihs
PA_chr01_G006837	ihs
PA_chr01_G006841	xpehh,ihs
PA_chr01_G006847	ihs
PA_chr01_G006867	ihs
PA_chr01_G006868	ihs
PA_chr01_G006875	ihs
PA_chr01_G006889	ihs
PA_chr01_G006893	ihs
PA_chr01_G006898	ihs
PA_chr01_G006900	ihs
PA_chr01_G006909	ihs
PA_chr01_G006911	ihs
PA_chr01_G006917	ihs
PA_chr01_G006918	ihs
PA_chr01_G006920	ihs
PA_chr01_G006921	xpehh,ihs
PA_chr01_G006922	xpehh,ihs
PA_chr01_G006926	xpehh,ihs
PA_chr01_G006930	xpehh
PA_chr01_G006946	ihs
PA_chr01_G006973	ihs
PA_chr01_G006978	ihs
PA_chr01_G006979	xpehh,ihs
PA_chr01_G006982	ihs
PA_chr01_G006988	ihs
PA_chr01_G006990	xpehh,ihs
PA_chr01_G007004	xpehh,ihs
PA_chr01_G007005	xpehh
PA_chr01_G007006	xpehh
PA_chr01_G007014	xpehh
PA_chr01_G007016	ihs
PA_chr01_G007028	ihs
PA_chr01_G007033	ihs
PA_chr01_G007034	ihs
PA_chr01_G007038	ihs
PA_chr01_G007041	xpehh
PA_chr01_G007046	ihs
PA_chr01_G007059	ihs
PA_chr01_G007070	xpehh
PA_chr01_G007071	xpehh
PA_chr01_G007074	xpehh
PA_chr01_G007086	xpehh,ihs
PA_chr01_G007087	ihs
PA_chr01_G007093	ihs
PA_chr01_G007096	xpehh
PA_chr01_G007099	ihs
PA_chr01_G007103	ihs
PA_chr01_G007105	xpehh,ihs
PA_chr01_G007116	ihs
PA_chr01_G007117	xpehh,ihs
PA_chr01_G007122	xpehh,ihs
PA_chr01_G007127	xpehh,ihs
PA_chr01_G007132	xpehh,ihs
PA_chr01_G007134	ihs
PA_chr01_G007147	ihs
PA_chr01_G007148	xpehh,ihs
PA_chr01_G007151	xpehh,ihs
PA_chr01_G007167	ihs
PA_chr01_G007174	ihs
PA_chr01_G007180	ihs
PA_chr01_G007188	ihs
PA_chr01_G007190	xpehh,ihs
PA_chr01_G007191	ihs
PA_chr01_G007200	ihs
PA_chr01_G007203	xpehh,ihs
PA_chr01_G007211	xpehh,ihs
PA_chr01_G007214	xpehh,ihs
PA_chr01_G007220	xpehh,ihs
PA_chr01_G007226	xpehh,ihs
PA_chr01_G007227	ihs
PA_chr01_G007228	ihs
PA_chr01_G007231	ihs
PA_chr01_G007232	ihs
PA_chr01_G007236	xpehh,ihs
PA_chr01_G007239	ihs
PA_chr01_G007243	xpehh,ihs
PA_chr01_G007251	xpehh
PA_chr01_G007266	xpehh,ihs
PA_chr01_G007268	ihs
PA_chr01_G007270	xpehh
PA_chr01_G007271	xpehh,ihs
PA_chr01_G007273	xpehh,ihs
PA_chr01_G007291	ihs
PA_chr01_G007317	ihs
PA_chr02_G000326	ihs
PA_chr02_G000327	ihs
PA_chr02_G000329	ihs
PA_chr02_G000330	ihs
PA_chr02_G000332	xpehh
PA_chr02_G000335	xpehh,ihs
PA_chr02_G000338	ihs
PA_chr02_G000345	ihs
PA_chr02_G000351	ihs
PA_chr02_G000352	ihs
PA_chr02_G000354	ihs
PA_chr02_G000355	ihs
PA_chr02_G000358	ihs
PA_chr02_G000369	xpehh,ihs
PA_chr02_G000376	ihs
PA_chr02_G000382	ihs
PA_chr02_G000387	xpehh,ihs
PA_chr02_G000398	ihs
PA_chr02_G000407	ihs
PA_chr02_G000409	xpehh,ihs
PA_chr02_G000423	ihs
PA_chr02_G000429	xpehh,ihs
PA_chr02_G000438	ihs
PA_chr02_G000442	ihs
PA_chr02_G000446	ihs
PA_chr02_G000459	xpehh,ihs
PA_chr02_G000465	ihs
PA_chr02_G000466	xpehh
PA_chr02_G000477	xpehh,ihs
PA_chr02_G000481	ihs
PA_chr02_G000493	ihs
PA_chr02_G000495	ihs
PA_chr02_G000496	ihs
PA_chr02_G000498	xpehh,ihs
PA_chr02_G000501	ihs
PA_chr02_G000509	xpehh,ihs
PA_chr02_G000513	ihs
PA_chr02_G000514	ihs
PA_chr02_G000527	ihs
PA_chr02_G000528	ihs
PA_chr02_G000540	xpehh,ihs
PA_chr02_G000542	ihs
PA_chr02_G000547	ihs
PA_chr02_G000552	xpehh,ihs
PA_chr02_G000562	ihs
PA_chr02_G000563	ihs
PA_chr02_G000567	ihs
PA_chr02_G000572	xpehh
PA_chr02_G000574	xpehh,ihs
PA_chr02_G000582	ihs
PA_chr02_G000584	xpehh
PA_chr02_G000586	ihs
PA_chr02_G000588	ihs
PA_chr02_G000604	ihs
PA_chr02_G000605	xpehh,ihs
PA_chr02_G000644	ihs
PA_chr02_G000645	ihs
PA_chr02_G000653	xpehh,ihs
PA_chr02_G000657	ihs
PA_chr02_G000664	ihs
PA_chr02_G000667	xpehh,ihs
PA_chr02_G000668	ihs
PA_chr02_G000671	xpehh
PA_chr02_G000683	xpehh,ihs
PA_chr02_G000691	ihs
PA_chr02_G000700	xpehh
PA_chr02_G000704	ihs
PA_chr02_G000710	xpehh,ihs
PA_chr02_G000713	ihs
PA_chr02_G000715	ihs
PA_chr02_G000730	xpehh,ihs
PA_chr02_G000732	xpehh,ihs
PA_chr02_G000735	xpehh,ihs
PA_chr02_G000738	xpehh
PA_chr02_G000741	ihs
PA_chr02_G000746	ihs
PA_chr02_G000747	ihs
PA_chr02_G000758	xpehh,ihs
PA_chr02_G000762	ihs
PA_chr02_G000773	xpehh,ihs
PA_chr02_G000788	ihs
PA_chr02_G000798	xpehh
PA_chr02_G000799	ihs
PA_chr02_G000802	ihs
PA_chr02_G000812	xpehh
PA_chr02_G000818	xpehh
PA_chr02_G000820	xpehh,ihs
PA_chr02_G000821	ihs
PA_chr02_G000831	xpehh
PA_chr02_G000836	xpehh,ihs
PA_chr02_G000847	xpehh,ihs
PA_chr02_G000863	ihs
PA_chr02_G000865	ihs
PA_chr02_G000870	ihs
PA_chr02_G000871	xpehh,ihs
PA_chr02_G000875	xpehh,ihs
PA_chr02_G000881	ihs
PA_chr02_G000902	xpehh,ihs
PA_chr02_G000913	ihs
PA_chr02_G000938	ihs
PA_chr02_G000942	ihs
PA_chr02_G000945	ihs
PA_chr02_G000946	ihs
PA_chr02_G000949	ihs
PA_chr02_G000952	xpehh,ihs
PA_chr02_G000957	ihs
PA_chr02_G000963	xpehh,ihs
PA_chr02_G000970	xpehh,ihs
PA_chr02_G000973	ihs
PA_chr02_G000974	ihs
PA_chr02_G000977	ihs
PA_chr02_G000985	ihs
PA_chr02_G000986	ihs
PA_chr02_G000989	xpehh,ihs
PA_chr02_G001003	ihs
PA_chr02_G001010	ihs
PA_chr02_G001015	xpehh,ihs
PA_chr02_G001021	ihs
PA_chr02_G001059	xpehh
PA_chr02_G001067	ihs
PA_chr02_G001068	xpehh,ihs
PA_chr02_G001071	ihs
PA_chr02_G001079	xpehh,ihs
PA_chr02_G001081	ihs
PA_chr02_G001084	ihs
PA_chr02_G001092	xpehh,ihs
PA_chr02_G001093	xpehh,ihs
PA_chr02_G001097	xpehh,ihs
PA_chr02_G001101	xpehh,ihs
PA_chr02_G001104	xpehh
PA_chr02_G001115	ihs
PA_chr02_G001125	ihs
PA_chr02_G001130	xpehh,ihs
PA_chr02_G001140	ihs
PA_chr02_G001160	xpehh,ihs
PA_chr02_G001163	xpehh,ihs
PA_chr02_G001168	ihs
PA_chr02_G001191	ihs
PA_chr02_G001196	ihs
PA_chr02_G001205	ihs
PA_chr02_G001210	ihs
PA_chr02_G001218	xpehh
PA_chr02_G001221	ihs
PA_chr02_G001227	xpehh
PA_chr02_G001229	xpehh,ihs
PA_chr02_G001231	xpehh
PA_chr02_G001232	xpehh
PA_chr02_G001249	xpehh,ihs
PA_chr02_G001278	xpehh,ihs
PA_chr02_G001280	ihs
PA_chr02_G001283	xpehh,ihs
PA_chr02_G001287	xpehh,ihs
PA_chr02_G001291	ihs
PA_chr02_G001316	xpehh,ihs
PA_chr02_G001321	ihs
PA_chr02_G001325	xpehh,ihs
PA_chr02_G001326	xpehh
PA_chr02_G001342	ihs
PA_chr02_G001343	ihs
PA_chr02_G001344	ihs
PA_chr02_G001345	ihs
PA_chr02_G001349	ihs
PA_chr02_G001351	ihs
PA_chr02_G001360	ihs
PA_chr02_G001361	ihs
PA_chr02_G001367	ihs
PA_chr02_G001371	ihs
PA_chr02_G001372	xpehh,ihs
PA_chr02_G001374	ihs
PA_chr02_G001386	ihs
PA_chr02_G001388	ihs
PA_chr02_G001540	ihs
PA_chr02_G001544	xpehh,ihs
PA_chr02_G001545	xpehh,ihs
PA_chr02_G001550	xpehh
PA_chr02_G001552	ihs
PA_chr02_G001553	ihs
PA_chr02_G001557	ihs
PA_chr02_G001559	ihs
PA_chr02_G001575	xpehh,ihs
PA_chr02_G001577	xpehh
PA_chr02_G001584	ihs
PA_chr02_G001586	xpehh,ihs
PA_chr02_G001587	xpehh
PA_chr02_G001589	ihs
PA_chr02_G001593	xpehh,ihs
PA_chr02_G001595	ihs
PA_chr02_G001604	ihs
PA_chr02_G001606	xpehh,ihs
PA_chr02_G001607	xpehh
PA_chr02_G001610	ihs
PA_chr02_G001612	xpehh,ihs
PA_chr02_G001622	xpehh,ihs
PA_chr02_G001624	xpehh,ihs
PA_chr02_G001627	xpehh
PA_chr02_G001629	xpehh
PA_chr02_G001630	xpehh
PA_chr02_G001631	xpehh,ihs
PA_chr02_G001632	xpehh,ihs
PA_chr02_G001634	xpehh
PA_chr02_G001636	xpehh,ihs
PA_chr02_G001640	xpehh,ihs
PA_chr02_G001655	ihs
PA_chr02_G001658	ihs
PA_chr02_G001660	ihs
PA_chr02_G001666	xpehh,ihs
PA_chr02_G001670	xpehh
PA_chr02_G001678	ihs
PA_chr02_G001680	xpehh
PA_chr02_G001682	xpehh
PA_chr02_G001692	xpehh,ihs
PA_chr02_G001696	ihs
PA_chr02_G001706	xpehh,ihs
PA_chr02_G001712	ihs
PA_chr02_G001731	ihs
PA_chr02_G001732	ihs
PA_chr02_G001754	ihs
PA_chr02_G001757	ihs
PA_chr02_G001758	ihs
PA_chr02_G001764	xpehh
PA_chr02_G001773	ihs
PA_chr02_G001796	xpehh,ihs
PA_chr02_G001802	xpehh,ihs
PA_chr02_G001805	ihs
PA_chr02_G001806	ihs
PA_chr02_G001825	xpehh,ihs
PA_chr02_G001831	ihs
PA_chr02_G001840	xpehh,ihs
PA_chr02_G001850	ihs
PA_chr02_G001852	ihs
PA_chr02_G001854	ihs
PA_chr02_G001855	ihs
PA_chr02_G001899	ihs
PA_chr02_G001932	xpehh,ihs
PA_chr02_G002083	xpehh,ihs
PA_chr02_G002086	xpehh,ihs
PA_chr02_G002087	xpehh,ihs
PA_chr02_G002089	xpehh
PA_chr02_G002093	xpehh,ihs
PA_chr02_G002096	ihs
PA_chr02_G002171	xpehh,ihs
PA_chr02_G002173	xpehh
PA_chr02_G002209	ihs
PA_chr02_G002221	ihs
PA_chr02_G002228	xpehh,ihs
PA_chr02_G002230	xpehh,ihs
PA_chr02_G002240	xpehh,ihs
PA_chr02_G002274	ihs
PA_chr02_G002286	ihs
PA_chr02_G002288	xpehh,ihs
PA_chr02_G002295	xpehh,ihs
PA_chr02_G002296	ihs
PA_chr02_G002299	xpehh
PA_chr02_G002305	ihs
PA_chr02_G002310	xpehh,ihs
PA_chr02_G002317	xpehh,ihs
PA_chr02_G002318	xpehh,ihs
PA_chr02_G002319	xpehh,ihs
PA_chr02_G002329	xpehh,ihs
PA_chr02_G002334	ihs
PA_chr02_G002343	ihs
PA_chr02_G002347	ihs
PA_chr02_G002348	xpehh
PA_chr02_G002360	xpehh,ihs
PA_chr02_G002363	ihs
PA_chr02_G002372	ihs
PA_chr02_G002374	ihs
PA_chr02_G002381	xpehh,ihs
PA_chr02_G002384	xpehh
PA_chr02_G002385	xpehh
PA_chr02_G002388	xpehh,ihs
PA_chr02_G002389	ihs
PA_chr02_G002391	ihs
PA_chr02_G002451	ihs
PA_chr02_G002452	ihs
PA_chr02_G002461	ihs
PA_chr02_G002472	ihs
PA_chr02_G002477	ihs
PA_chr02_G002483	ihs
PA_chr02_G002493	ihs
PA_chr02_G002505	xpehh
PA_chr02_G002514	ihs
PA_chr02_G002518	xpehh,ihs
PA_chr02_G002523	xpehh,ihs
PA_chr02_G002526	xpehh,ihs
PA_chr02_G002535	ihs
PA_chr02_G002558	ihs
PA_chr02_G002561	xpehh
PA_chr02_G002562	xpehh,ihs
PA_chr02_G002567	xpehh,ihs
PA_chr02_G002607	xpehh,ihs
PA_chr02_G002613	ihs
PA_chr02_G002623	ihs
PA_chr02_G002627	ihs
PA_chr02_G002640	xpehh,ihs
PA_chr02_G002643	xpehh
PA_chr02_G002664	xpehh,ihs
PA_chr02_G002673	xpehh,ihs
PA_chr02_G002684	ihs
PA_chr02_G002693	ihs
PA_chr02_G002696	xpehh,ihs
PA_chr02_G002698	ihs
PA_chr02_G002704	ihs
PA_chr02_G002708	ihs
PA_chr02_G002709	xpehh,ihs
PA_chr02_G002711	ihs
PA_chr02_G002715	ihs
PA_chr02_G002719	xpehh,ihs
PA_chr02_G002726	xpehh,ihs
PA_chr02_G002729	xpehh,ihs
PA_chr02_G002733	ihs
PA_chr02_G002738	xpehh
PA_chr02_G002739	ihs
PA_chr02_G002741	ihs
PA_chr02_G002742	xpehh,ihs
PA_chr02_G002743	ihs
PA_chr02_G002746	xpehh,ihs
PA_chr02_G002759	ihs
PA_chr02_G002774	xpehh,ihs
PA_chr02_G002786	ihs
PA_chr02_G002789	xpehh
PA_chr02_G002791	ihs
PA_chr02_G002801	xpehh,ihs
PA_chr02_G002803	ihs
PA_chr02_G002807	xpehh,ihs
PA_chr02_G002809	xpehh,ihs
PA_chr02_G002817	xpehh,ihs
PA_chr02_G002828	xpehh
PA_chr02_G002832	xpehh,ihs
PA_chr02_G002834	xpehh,ihs
PA_chr02_G002846	ihs
PA_chr02_G002849	xpehh,ihs
PA_chr02_G002852	xpehh,ihs
PA_chr02_G002853	xpehh,ihs
PA_chr02_G002855	ihs
PA_chr02_G002857	xpehh,ihs
PA_chr02_G002859	xpehh
PA_chr02_G002860	xpehh,ihs
PA_chr02_G002862	xpehh,ihs
PA_chr02_G002865	ihs
PA_chr02_G002880	ihs
PA_chr02_G002881	xpehh,ihs
PA_chr02_G002886	xpehh,ihs
PA_chr02_G002891	ihs
PA_chr02_G002895	xpehh,ihs
PA_chr02_G002905	xpehh,ihs
PA_chr02_G002916	xpehh,ihs
PA_chr02_G002924	xpehh,ihs
PA_chr02_G002925	ihs
PA_chr02_G002931	xpehh,ihs
PA_chr02_G002933	xpehh,ihs
PA_chr02_G002937	ihs
PA_chr02_G002943	xpehh,ihs
PA_chr02_G002945	ihs
PA_chr02_G002952	ihs
PA_chr02_G002955	xpehh,ihs
PA_chr02_G002958	ihs
PA_chr02_G002959	xpehh,ihs
PA_chr02_G002962	ihs
PA_chr02_G002964	ihs
PA_chr02_G002968	xpehh,ihs
PA_chr02_G002970	xpehh,ihs
PA_chr02_G002972	xpehh
PA_chr02_G002974	ihs
PA_chr02_G002982	ihs
PA_chr02_G002985	xpehh,ihs
PA_chr02_G002995	xpehh
PA_chr02_G002997	ihs
PA_chr02_G003001	ihs
PA_chr02_G003005	ihs
PA_chr02_G003009	ihs
PA_chr02_G003013	xpehh,ihs
PA_chr02_G003014	xpehh,ihs
PA_chr02_G003017	ihs
PA_chr02_G003018	xpehh,ihs
PA_chr02_G003021	ihs
PA_chr02_G003025	xpehh,ihs
PA_chr02_G003033	xpehh
PA_chr02_G003040	xpehh,ihs
PA_chr02_G003042	ihs
PA_chr02_G003046	ihs
PA_chr02_G003048	ihs
PA_chr02_G003055	xpehh,ihs
PA_chr02_G003057	xpehh,ihs
PA_chr02_G003058	xpehh,ihs
PA_chr02_G003060	xpehh
PA_chr02_G003061	ihs
PA_chr02_G003070	ihs
PA_chr02_G003074	xpehh,ihs
PA_chr02_G003077	xpehh,ihs
PA_chr02_G003079	xpehh,ihs
PA_chr02_G003089	xpehh,ihs
PA_chr02_G003090	xpehh,ihs
PA_chr02_G003092	xpehh
PA_chr02_G003097	xpehh,ihs
PA_chr02_G003098	xpehh,ihs
PA_chr02_G003100	ihs
PA_chr02_G003101	ihs
PA_chr02_G003106	xpehh,ihs
PA_chr02_G003117	ihs
PA_chr02_G003126	ihs
PA_chr02_G003128	xpehh,ihs
PA_chr02_G003129	xpehh,ihs
PA_chr02_G003131	xpehh,ihs
PA_chr02_G003132	ihs
PA_chr02_G003137	ihs
PA_chr02_G003142	xpehh,ihs
PA_chr02_G003145	xpehh
PA_chr02_G003150	xpehh,ihs
PA_chr02_G003153	ihs
PA_chr02_G003155	xpehh
PA_chr02_G003157	xpehh,ihs
PA_chr02_G003162	xpehh,ihs
PA_chr02_G003163	xpehh,ihs
PA_chr02_G003164	xpehh,ihs
PA_chr02_G003168	xpehh,ihs
PA_chr02_G003170	xpehh,ihs
PA_chr02_G003179	xpehh,ihs
PA_chr02_G003180	ihs
PA_chr02_G003187	ihs
PA_chr02_G003190	xpehh,ihs
PA_chr02_G003207	xpehh
PA_chr02_G003213	ihs
PA_chr02_G003217	xpehh,ihs
PA_chr02_G003218	ihs
PA_chr02_G003219	ihs
PA_chr02_G003222	ihs
PA_chr02_G003223	ihs
PA_chr02_G003224	ihs
PA_chr02_G003228	xpehh,ihs
PA_chr02_G003231	ihs
PA_chr02_G003239	ihs
PA_chr02_G003241	ihs
PA_chr02_G003245	ihs
PA_chr02_G003252	ihs
PA_chr02_G003266	ihs
PA_chr02_G003276	ihs
PA_chr02_G003277	xpehh
PA_chr02_G003290	xpehh
PA_chr02_G003300	xpehh
PA_chr02_G003302	ihs
PA_chr02_G003304	ihs
PA_chr02_G003310	xpehh,ihs
PA_chr02_G003311	ihs
PA_chr02_G003318	ihs
PA_chr02_G003319	ihs
PA_chr02_G003320	ihs
PA_chr02_G003327	xpehh
PA_chr02_G003333	ihs
PA_chr02_G003343	ihs
PA_chr02_G003344	ihs
PA_chr02_G003347	xpehh
PA_chr02_G003350	ihs
PA_chr02_G003354	ihs
PA_chr02_G003355	ihs
PA_chr02_G003356	xpehh,ihs
PA_chr02_G003364	ihs
PA_chr02_G003371	xpehh,ihs
PA_chr02_G003373	xpehh,ihs
PA_chr02_G003374	ihs
PA_chr02_G003406	xpehh,ihs
PA_chr02_G003407	xpehh
PA_chr02_G003408	xpehh
PA_chr02_G003409	xpehh
PA_chr02_G003411	xpehh
PA_chr02_G003412	xpehh
PA_chr02_G003414	ihs
PA_chr02_G003415	ihs
PA_chr02_G003433	ihs
PA_chr02_G003435	ihs
PA_chr02_G003436	ihs
PA_chr02_G003438	ihs
PA_chr02_G003439	ihs
PA_chr02_G003440	ihs
PA_chr02_G003441	ihs
PA_chr02_G003454	ihs
PA_chr02_G003467	xpehh
PA_chr02_G003478	ihs
PA_chr02_G003483	xpehh,ihs
PA_chr02_G003490	ihs
PA_chr02_G003491	ihs
PA_chr02_G003494	xpehh,ihs
PA_chr02_G003505	xpehh,ihs
PA_chr02_G003508	ihs
PA_chr02_G003517	ihs
PA_chr02_G003543	ihs
PA_chr02_G003546	xpehh,ihs
PA_chr02_G003549	xpehh,ihs
PA_chr02_G003550	xpehh,ihs
PA_chr02_G003561	xpehh,ihs
PA_chr02_G003565	ihs
PA_chr02_G003566	xpehh,ihs
PA_chr02_G003568	xpehh,ihs
PA_chr02_G003576	xpehh
PA_chr02_G003577	xpehh
PA_chr02_G003581	xpehh
PA_chr02_G003606	xpehh,ihs
PA_chr02_G003608	ihs
PA_chr02_G003621	ihs
PA_chr02_G003625	ihs
PA_chr02_G003654	xpehh,ihs
PA_chr02_G003677	ihs
PA_chr02_G003679	ihs
PA_chr02_G003681	ihs
PA_chr02_G003690	ihs
PA_chr02_G003695	xpehh
PA_chr02_G003700	xpehh,ihs
PA_chr02_G003706	xpehh,ihs
PA_chr02_G003707	xpehh,ihs
PA_chr02_G003713	xpehh,ihs
PA_chr02_G003718	ihs
PA_chr02_G003719	ihs
PA_chr02_G003725	xpehh
PA_chr02_G003729	xpehh,ihs
PA_chr02_G003731	ihs
PA_chr02_G003733	ihs
PA_chr02_G003734	xpehh,ihs
PA_chr02_G003736	xpehh,ihs
PA_chr02_G003737	xpehh
PA_chr02_G003741	ihs
PA_chr02_G003742	ihs
PA_chr02_G003750	ihs
PA_chr02_G003764	ihs
PA_chr02_G003775	xpehh,ihs
PA_chr02_G003778	xpehh,ihs
PA_chr02_G003787	xpehh,ihs
PA_chr02_G003797	xpehh,ihs
PA_chr02_G003799	ihs
PA_chr02_G003808	ihs
PA_chr02_G003809	xpehh,ihs
PA_chr02_G003849	xpehh,ihs
PA_chr02_G003850	ihs
PA_chr02_G003855	ihs
PA_chr02_G003856	xpehh,ihs
PA_chr02_G003866	ihs
PA_chr02_G003897	xpehh
PA_chr02_G003904	ihs
PA_chr02_G003908	xpehh,ihs
PA_chr02_G003913	xpehh,ihs
PA_chr02_G003922	ihs
PA_chr02_G003935	xpehh,ihs
PA_chr02_G003944	xpehh
PA_chr02_G003945	ihs
PA_chr02_G003962	ihs
PA_chr02_G003963	xpehh,ihs
PA_chr02_G003982	xpehh,ihs
PA_chr02_G003986	ihs
PA_chr02_G003992	xpehh,ihs
PA_chr02_G004047	xpehh,ihs
PA_chr02_G004051	xpehh,ihs
PA_chr02_G004092	xpehh,ihs
PA_chr02_G004097	xpehh,ihs
PA_chr02_G004102	xpehh
PA_chr02_G004103	xpehh,ihs
PA_chr02_G004108	xpehh
PA_chr02_G004109	xpehh,ihs
PA_chr02_G004113	xpehh,ihs
PA_chr02_G004119	xpehh,ihs
PA_chr02_G004122	ihs
PA_chr02_G004127	ihs
PA_chr02_G004137	ihs
PA_chr02_G004138	ihs
PA_chr02_G004140	ihs
PA_chr02_G004144	ihs
PA_chr02_G004148	xpehh,ihs
PA_chr02_G004151	xpehh,ihs
PA_chr02_G004175	xpehh,ihs
PA_chr02_G004181	xpehh,ihs
PA_chr02_G004187	xpehh
PA_chr02_G004188	ihs
PA_chr02_G004190	ihs
PA_chr02_G004191	xpehh,ihs
PA_chr02_G004208	ihs
PA_chr02_G004215	ihs
PA_chr02_G004226	xpehh,ihs
PA_chr02_G004227	xpehh,ihs
PA_chr02_G004234	xpehh,ihs
PA_chr02_G004243	ihs
PA_chr02_G004249	xpehh,ihs
PA_chr02_G004262	xpehh,ihs
PA_chr02_G004269	ihs
PA_chr02_G004277	ihs
PA_chr02_G004279	xpehh
PA_chr02_G004282	xpehh,ihs
PA_chr02_G004283	ihs
PA_chr02_G004286	ihs
PA_chr02_G004288	ihs
PA_chr02_G004311	ihs
PA_chr02_G004312	xpehh,ihs
PA_chr02_G004319	ihs
PA_chr02_G004320	xpehh,ihs
PA_chr02_G004337	ihs
PA_chr02_G004353	ihs
PA_chr02_G004354	xpehh,ihs
PA_chr02_G004355	xpehh
PA_chr02_G004365	ihs
PA_chr02_G004366	ihs
PA_chr02_G004367	xpehh,ihs
PA_chr02_G004375	xpehh,ihs
PA_chr02_G004426	ihs
PA_chr02_G004429	ihs
PA_chr02_G004431	xpehh,ihs
PA_chr02_G004434	ihs
PA_chr02_G004436	xpehh,ihs
PA_chr02_G004445	ihs
PA_chr02_G004446	ihs
PA_chr02_G004451	ihs
PA_chr02_G004454	xpehh,ihs
PA_chr02_G004459	xpehh,ihs
PA_chr02_G004465	xpehh,ihs
PA_chr02_G004466	xpehh,ihs
PA_chr02_G004478	ihs
PA_chr02_G004482	xpehh,ihs
PA_chr02_G004484	xpehh
PA_chr02_G004511	xpehh
PA_chr02_G004516	xpehh,ihs
PA_chr02_G004518	xpehh,ihs
PA_chr02_G004542	xpehh,ihs
PA_chr02_G004543	xpehh
PA_chr02_G004550	xpehh
PA_chr02_G004574	xpehh,ihs
PA_chr02_G004582	xpehh
PA_chr02_G004600	ihs
PA_chr02_G004603	ihs
PA_chr02_G004611	xpehh
PA_chr02_G004635	xpehh,ihs
PA_chr02_G004659	ihs
PA_chr02_G004663	ihs
PA_chr02_G004669	ihs
PA_chr02_G004676	ihs
PA_chr02_G004680	ihs
PA_chr02_G004687	ihs
PA_chr02_G004694	xpehh,ihs
PA_chr02_G004698	xpehh,ihs
PA_chr02_G004701	ihs
PA_chr02_G004715	xpehh,ihs
PA_chr02_G004718	ihs
PA_chr02_G004721	ihs
PA_chr02_G004726	ihs
PA_chr02_G004729	ihs
PA_chr02_G004740	ihs
PA_chr02_G004746	ihs
PA_chr02_G004780	xpehh,ihs
PA_chr02_G004784	xpehh,ihs
PA_chr02_G004799	ihs
PA_chr02_G004805	xpehh,ihs
PA_chr02_G004806	ihs
PA_chr02_G004809	ihs
PA_chr02_G004849	xpehh
PA_chr02_G004850	xpehh,ihs
PA_chr02_G004854	xpehh
PA_chr02_G004858	xpehh
PA_chr02_G004867	ihs
PA_chr02_G004871	xpehh,ihs
PA_chr02_G004872	xpehh,ihs
PA_chr02_G004879	xpehh,ihs
PA_chr02_G004880	xpehh,ihs
PA_chr02_G004898	ihs
PA_chr02_G004899	ihs
PA_chr02_G004914	xpehh
PA_chr02_G004915	ihs
PA_chr02_G004918	ihs
PA_chr02_G004919	xpehh
PA_chr02_G004923	xpehh,ihs
PA_chr02_G004931	ihs
PA_chr02_G004933	ihs
PA_chr02_G004958	ihs
PA_chr02_G004964	ihs
PA_chr02_G004966	ihs
PA_chr02_G004967	ihs
PA_chr02_G004972	ihs
PA_chr02_G004975	ihs
PA_chr02_G004983	xpehh,ihs
PA_chr02_G004999	xpehh,ihs
PA_chr02_G005030	ihs
PA_chr02_G005031	ihs
PA_chr02_G005046	ihs
PA_chr02_G005048	ihs
PA_chr02_G005049	xpehh
PA_chr02_G005067	xpehh,ihs
PA_chr02_G005073	ihs
PA_chr02_G005088	xpehh
PA_chr02_G005121	ihs
PA_chr02_G005122	ihs
PA_chr02_G005123	ihs
PA_chr02_G005168	ihs
PA_chr02_G005188	xpehh
PA_chr02_G005193	xpehh
PA_chr02_G005195	xpehh,ihs
PA_chr02_G005203	xpehh
PA_chr02_G005209	ihs
PA_chr02_G005215	xpehh,ihs
PA_chr02_G005220	ihs
PA_chr02_G005223	xpehh,ihs
PA_chr02_G005245	ihs
PA_chr02_G005259	ihs
PA_chr02_G005264	xpehh
PA_chr02_G005266	ihs
PA_chr02_G005267	xpehh,ihs
PA_chr02_G005270	xpehh
PA_chr02_G005278	ihs
PA_chr02_G005279	ihs
PA_chr02_G005281	xpehh,ihs
PA_chr02_G005283	ihs
PA_chr02_G005284	ihs
PA_chr02_G005285	ihs
PA_chr02_G005296	ihs
PA_chr02_G005298	ihs
PA_chr02_G005309	ihs
PA_chr02_G005314	xpehh,ihs
PA_chr02_G005320	ihs
PA_chr02_G005359	ihs
PA_chr02_G005362	ihs
PA_chr02_G005365	xpehh,ihs
PA_chr02_G005369	xpehh,ihs
PA_chr02_G005373	ihs
PA_chr02_G005375	ihs
PA_chr02_G005378	xpehh,ihs
PA_chr02_G005381	ihs
PA_chr02_G005387	xpehh
PA_chr02_G005393	ihs
PA_chr02_G005398	ihs
PA_chr02_G005400	xpehh
PA_chr02_G005415	xpehh,ihs
PA_chr02_G005437	xpehh
PA_chr02_G005463	xpehh,ihs
PA_chr02_G005465	xpehh,ihs
PA_chr02_G005473	ihs
PA_chr02_G005498	ihs
PA_chr02_G005506	ihs
PA_chr02_G005507	xpehh,ihs
PA_chr02_G005531	xpehh,ihs
PA_chr02_G005569	ihs
PA_chr02_G005590	ihs
PA_chr02_G005591	ihs
PA_chr02_G005595	xpehh
PA_chr02_G005596	xpehh
PA_chr02_G005597	xpehh
PA_chr02_G005598	xpehh
PA_chr02_G005599	xpehh
PA_chr02_G005600	xpehh
PA_chr02_G005602	xpehh,ihs
PA_chr02_G005606	ihs
PA_chr02_G005607	xpehh,ihs
PA_chr02_G005621	xpehh,ihs
PA_chr02_G005624	xpehh,ihs
PA_chr02_G005637	ihs
PA_chr02_G005641	xpehh
PA_chr02_G005653	ihs
PA_chr02_G005671	ihs
PA_chr02_G005675	xpehh,ihs
PA_chr02_G005678	xpehh,ihs
PA_chr02_G005709	xpehh,ihs
PA_chr02_G005729	xpehh,ihs
PA_chr02_G005736	xpehh
PA_chr02_G005737	xpehh
PA_chr02_G005738	ihs
PA_chr03_G000003	xpehh,ihs
PA_chr03_G000004	xpehh,ihs
PA_chr03_G000005	xpehh,ihs
PA_chr03_G000024	ihs
PA_chr03_G000045	xpehh,ihs
PA_chr03_G000050	ihs
PA_chr03_G000055	ihs
PA_chr03_G000065	xpehh
PA_chr03_G000066	xpehh
PA_chr03_G000069	ihs
PA_chr03_G000075	ihs
PA_chr03_G000076	ihs
PA_chr03_G000092	ihs
PA_chr03_G000111	ihs
PA_chr03_G000112	xpehh,ihs
PA_chr03_G000117	ihs
PA_chr03_G000120	ihs
PA_chr03_G000132	ihs
PA_chr03_G000133	ihs
PA_chr03_G000141	xpehh,ihs
PA_chr03_G000144	xpehh,ihs
PA_chr03_G000145	xpehh,ihs
PA_chr03_G000153	xpehh
PA_chr03_G000186	ihs
PA_chr03_G000195	ihs
PA_chr03_G000197	xpehh,ihs
PA_chr03_G000212	xpehh,ihs
PA_chr03_G000224	xpehh,ihs
PA_chr03_G000231	xpehh
PA_chr03_G000232	xpehh,ihs
PA_chr03_G000234	xpehh,ihs
PA_chr03_G000235	xpehh,ihs
PA_chr03_G000240	ihs
PA_chr03_G000245	ihs
PA_chr03_G000256	ihs
PA_chr03_G000260	ihs
PA_chr03_G000263	ihs
PA_chr03_G000268	xpehh,ihs
PA_chr03_G000270	ihs
PA_chr03_G000273	xpehh,ihs
PA_chr03_G000277	xpehh,ihs
PA_chr03_G000287	ihs
PA_chr03_G000289	xpehh,ihs
PA_chr03_G000295	ihs
PA_chr03_G000300	xpehh,ihs
PA_chr03_G000301	xpehh
PA_chr03_G000306	ihs
PA_chr03_G000321	xpehh,ihs
PA_chr03_G000350	ihs
PA_chr03_G000368	ihs
PA_chr03_G000370	xpehh,ihs
PA_chr03_G000382	xpehh,ihs
PA_chr03_G000386	ihs
PA_chr03_G000393	xpehh
PA_chr03_G000394	ihs
PA_chr03_G000398	ihs
PA_chr03_G000417	ihs
PA_chr03_G000420	xpehh,ihs
PA_chr03_G000426	ihs
PA_chr03_G000438	ihs
PA_chr03_G000439	ihs
PA_chr03_G000445	xpehh
PA_chr03_G000446	xpehh,ihs
PA_chr03_G000451	ihs
PA_chr03_G000454	xpehh,ihs
PA_chr03_G000464	ihs
PA_chr03_G000483	xpehh
PA_chr03_G000488	ihs
PA_chr03_G000496	ihs
PA_chr03_G000497	xpehh,ihs
PA_chr03_G000498	ihs
PA_chr03_G000499	ihs
PA_chr03_G000500	xpehh,ihs
PA_chr03_G000517	ihs
PA_chr03_G000519	ihs
PA_chr03_G000521	ihs
PA_chr03_G000534	xpehh,ihs
PA_chr03_G000539	xpehh,ihs
PA_chr03_G000556	xpehh
PA_chr03_G000565	ihs
PA_chr03_G000571	ihs
PA_chr03_G000582	ihs
PA_chr03_G000589	ihs
PA_chr03_G000590	ihs
PA_chr03_G000592	ihs
PA_chr03_G000597	ihs
PA_chr03_G000603	ihs
PA_chr03_G000617	xpehh
PA_chr03_G000623	ihs
PA_chr03_G000625	ihs
PA_chr03_G000636	xpehh,ihs
PA_chr03_G000676	xpehh,ihs
PA_chr03_G000684	xpehh
PA_chr03_G000687	xpehh,ihs
PA_chr03_G000690	ihs
PA_chr03_G000693	ihs
PA_chr03_G000704	ihs
PA_chr03_G000705	ihs
PA_chr03_G000731	ihs
PA_chr03_G000732	xpehh,ihs
PA_chr03_G000742	xpehh,ihs
PA_chr03_G000746	xpehh,ihs
PA_chr03_G000771	xpehh,ihs
PA_chr03_G000773	xpehh,ihs
PA_chr03_G000787	xpehh,ihs
PA_chr03_G000791	xpehh,ihs
PA_chr03_G000796	ihs
PA_chr03_G000797	xpehh,ihs
PA_chr03_G000824	ihs
PA_chr03_G000834	ihs
PA_chr03_G000882	xpehh
PA_chr03_G000886	xpehh,ihs
PA_chr03_G000931	ihs
PA_chr03_G000942	ihs
PA_chr03_G000952	xpehh,ihs
PA_chr03_G000973	ihs
PA_chr03_G000977	xpehh,ihs
PA_chr03_G000985	xpehh,ihs
PA_chr03_G000994	ihs
PA_chr03_G001020	xpehh,ihs
PA_chr03_G001026	ihs
PA_chr03_G001034	xpehh
PA_chr03_G001041	ihs
PA_chr03_G001072	xpehh,ihs
PA_chr03_G001076	ihs
PA_chr03_G001091	ihs
PA_chr03_G001096	xpehh,ihs
PA_chr03_G001098	xpehh,ihs
PA_chr03_G001100	ihs
PA_chr03_G001107	xpehh,ihs
PA_chr03_G001113	xpehh,ihs
PA_chr03_G001114	ihs
PA_chr03_G001121	xpehh
PA_chr03_G001122	xpehh
PA_chr03_G001126	xpehh,ihs
PA_chr03_G001128	xpehh,ihs
PA_chr03_G001130	xpehh,ihs
PA_chr03_G001144	ihs
PA_chr03_G001155	ihs
PA_chr03_G001156	xpehh,ihs
PA_chr03_G001160	xpehh
PA_chr03_G001167	ihs
PA_chr03_G001173	xpehh,ihs
PA_chr03_G001182	ihs
PA_chr03_G001183	ihs
PA_chr03_G001203	ihs
PA_chr03_G001207	ihs
PA_chr03_G001209	ihs
PA_chr03_G001214	xpehh
PA_chr03_G001221	ihs
PA_chr03_G001240	xpehh,ihs
PA_chr03_G001242	ihs
PA_chr03_G001243	xpehh,ihs
PA_chr03_G001246	ihs
PA_chr03_G001247	ihs
PA_chr03_G001257	xpehh
PA_chr03_G001258	xpehh
PA_chr03_G001259	ihs
PA_chr03_G001261	ihs
PA_chr03_G001262	xpehh,ihs
PA_chr03_G001263	ihs
PA_chr03_G001268	ihs
PA_chr03_G001269	xpehh
PA_chr03_G001300	xpehh,ihs
PA_chr03_G001306	ihs
PA_chr03_G001312	ihs
PA_chr03_G001313	xpehh,ihs
PA_chr03_G001314	ihs
PA_chr03_G001316	ihs
PA_chr03_G001322	ihs
PA_chr03_G001324	xpehh,ihs
PA_chr03_G001334	xpehh,ihs
PA_chr03_G001385	ihs
PA_chr03_G001386	ihs
PA_chr03_G001402	ihs
PA_chr03_G001403	ihs
PA_chr03_G001408	ihs
PA_chr03_G001409	ihs
PA_chr03_G001411	ihs
PA_chr03_G001415	xpehh
PA_chr03_G001418	ihs
PA_chr03_G001424	ihs
PA_chr03_G001462	ihs
PA_chr03_G001467	xpehh
PA_chr03_G001469	ihs
PA_chr03_G001472	ihs
PA_chr03_G001479	xpehh,ihs
PA_chr03_G001480	ihs
PA_chr03_G001482	ihs
PA_chr03_G001485	ihs
PA_chr03_G001490	ihs
PA_chr03_G001505	xpehh
PA_chr03_G001506	xpehh
PA_chr03_G001507	xpehh,ihs
PA_chr03_G001509	xpehh,ihs
PA_chr03_G001510	xpehh
PA_chr03_G001512	xpehh,ihs
PA_chr03_G001513	ihs
PA_chr03_G001516	xpehh,ihs
PA_chr03_G001523	ihs
PA_chr03_G001538	ihs
PA_chr03_G001539	ihs
PA_chr03_G001542	ihs
PA_chr03_G001545	ihs
PA_chr03_G001558	ihs
PA_chr03_G001578	ihs
PA_chr03_G001579	ihs
PA_chr03_G001582	ihs
PA_chr03_G001584	xpehh,ihs
PA_chr03_G001591	xpehh
PA_chr03_G001596	xpehh,ihs
PA_chr03_G001601	xpehh,ihs
PA_chr03_G001611	ihs
PA_chr03_G001615	ihs
PA_chr03_G001616	xpehh,ihs
PA_chr03_G001622	ihs
PA_chr03_G001632	xpehh
PA_chr03_G001645	xpehh,ihs
PA_chr03_G001647	xpehh,ihs
PA_chr03_G001648	xpehh,ihs
PA_chr03_G001655	ihs
PA_chr03_G001656	ihs
PA_chr03_G001667	xpehh,ihs
PA_chr03_G001676	ihs
PA_chr03_G001685	xpehh
PA_chr03_G001689	xpehh,ihs
PA_chr03_G001690	xpehh
PA_chr03_G001692	xpehh,ihs
PA_chr03_G001693	xpehh,ihs
PA_chr03_G001695	xpehh,ihs
PA_chr03_G001702	xpehh
PA_chr03_G001718	ihs
PA_chr03_G001729	ihs
PA_chr03_G001732	ihs
PA_chr03_G001733	ihs
PA_chr03_G001744	ihs
PA_chr03_G001746	ihs
PA_chr03_G001754	ihs
PA_chr03_G001755	ihs
PA_chr03_G001761	xpehh,ihs
PA_chr03_G001762	ihs
PA_chr03_G001766	xpehh
PA_chr03_G001792	xpehh
PA_chr03_G001793	xpehh,ihs
PA_chr03_G001807	ihs
PA_chr03_G001808	ihs
PA_chr03_G001822	ihs
PA_chr03_G001825	ihs
PA_chr03_G001831	ihs
PA_chr03_G001837	ihs
PA_chr03_G001846	ihs
PA_chr03_G001848	ihs
PA_chr03_G001849	ihs
PA_chr03_G001852	xpehh,ihs
PA_chr03_G001857	ihs
PA_chr03_G001858	ihs
PA_chr03_G001872	ihs
PA_chr03_G001873	xpehh,ihs
PA_chr03_G001876	ihs
PA_chr03_G001881	ihs
PA_chr03_G001886	xpehh,ihs
PA_chr03_G001888	ihs
PA_chr03_G001890	ihs
PA_chr03_G001891	xpehh,ihs
PA_chr03_G001895	ihs
PA_chr03_G001896	ihs
PA_chr03_G001897	ihs
PA_chr03_G001898	xpehh,ihs
PA_chr03_G001904	ihs
PA_chr03_G001905	ihs
PA_chr03_G001925	xpehh,ihs
PA_chr03_G001933	xpehh
PA_chr03_G001941	ihs
PA_chr03_G001956	ihs
PA_chr03_G001960	ihs
PA_chr03_G001964	xpehh,ihs
PA_chr03_G001966	xpehh,ihs
PA_chr03_G001982	ihs
PA_chr03_G001998	xpehh,ihs
PA_chr03_G002069	ihs
PA_chr03_G002071	ihs
PA_chr03_G002075	ihs
PA_chr03_G002077	xpehh,ihs
PA_chr03_G002085	xpehh,ihs
PA_chr03_G002086	ihs
PA_chr03_G002089	ihs
PA_chr03_G002095	ihs
PA_chr03_G002096	xpehh,ihs
PA_chr03_G002099	ihs
PA_chr03_G002102	ihs
PA_chr03_G002110	ihs
PA_chr03_G002112	ihs
PA_chr03_G002125	xpehh,ihs
PA_chr03_G002126	xpehh,ihs
PA_chr03_G002127	xpehh,ihs
PA_chr03_G002133	xpehh
PA_chr03_G002134	xpehh,ihs
PA_chr03_G002136	xpehh,ihs
PA_chr03_G002148	ihs
PA_chr03_G002150	ihs
PA_chr03_G002152	ihs
PA_chr03_G002195	ihs
PA_chr03_G002199	xpehh,ihs
PA_chr03_G002200	ihs
PA_chr03_G002201	xpehh,ihs
PA_chr03_G002205	ihs
PA_chr03_G002209	xpehh,ihs
PA_chr03_G002212	ihs
PA_chr03_G002227	ihs
PA_chr03_G002228	xpehh
PA_chr03_G002229	xpehh,ihs
PA_chr03_G002231	xpehh
PA_chr03_G002239	xpehh,ihs
PA_chr03_G002255	ihs
PA_chr03_G002257	ihs
PA_chr03_G002261	xpehh,ihs
PA_chr03_G002267	xpehh,ihs
PA_chr03_G002273	ihs
PA_chr03_G002284	ihs
PA_chr03_G002286	ihs
PA_chr03_G002309	xpehh,ihs
PA_chr03_G002348	ihs
PA_chr03_G002349	xpehh,ihs
PA_chr03_G002359	xpehh,ihs
PA_chr03_G002364	ihs
PA_chr03_G002365	ihs
PA_chr03_G002367	xpehh
PA_chr03_G002368	xpehh,ihs
PA_chr03_G002371	xpehh,ihs
PA_chr03_G002385	xpehh,ihs
PA_chr03_G002390	ihs
PA_chr03_G002406	xpehh,ihs
PA_chr03_G002408	ihs
PA_chr03_G002412	ihs
PA_chr03_G002416	xpehh,ihs
PA_chr03_G002417	xpehh,ihs
PA_chr03_G002422	xpehh,ihs
PA_chr03_G002426	xpehh
PA_chr03_G002431	xpehh,ihs
PA_chr03_G002432	xpehh,ihs
PA_chr03_G002439	xpehh,ihs
PA_chr03_G002443	xpehh,ihs
PA_chr03_G002448	xpehh,ihs
PA_chr03_G002451	xpehh,ihs
PA_chr03_G002457	ihs
PA_chr03_G002468	xpehh
PA_chr03_G002476	xpehh,ihs
PA_chr03_G002489	xpehh,ihs
PA_chr03_G002496	ihs
PA_chr03_G002497	xpehh,ihs
PA_chr03_G002500	ihs
PA_chr03_G002506	xpehh,ihs
PA_chr03_G002509	xpehh,ihs
PA_chr03_G002512	xpehh,ihs
PA_chr03_G002518	ihs
PA_chr03_G002526	ihs
PA_chr03_G002549	ihs
PA_chr03_G002555	ihs
PA_chr03_G002558	xpehh,ihs
PA_chr03_G002560	ihs
PA_chr03_G002567	xpehh,ihs
PA_chr03_G002583	xpehh,ihs
PA_chr03_G002603	ihs
PA_chr03_G002607	ihs
PA_chr03_G002611	xpehh,ihs
PA_chr03_G002628	ihs
PA_chr03_G002629	ihs
PA_chr03_G002631	ihs
PA_chr03_G002633	ihs
PA_chr03_G002635	ihs
PA_chr03_G002642	ihs
PA_chr03_G002643	xpehh,ihs
PA_chr03_G002646	xpehh,ihs
[truncated: 6,995 more rows]

## Sheet: gene-id_selected-genes_set-679
PA_chr01_G000108
PA_chr01_G000455
PA_chr01_G000460
PA_chr01_G000467
PA_chr01_G001086
PA_chr01_G001088
PA_chr01_G001093
PA_chr01_G001097
PA_chr01_G001102
PA_chr01_G001116
PA_chr01_G001247
PA_chr01_G001402
PA_chr01_G002417
PA_chr01_G002588
PA_chr01_G002819
PA_chr01_G003112
PA_chr01_G003113
PA_chr01_G003116
PA_chr01_G003153
PA_chr01_G003154
PA_chr01_G003669
PA_chr01_G003672
PA_chr01_G003709
PA_chr01_G003710
PA_chr01_G003711
PA_chr01_G003727
PA_chr01_G003728
PA_chr01_G003730
PA_chr01_G003732
PA_chr01_G003741
PA_chr01_G003745
PA_chr01_G003752
PA_chr01_G003753
PA_chr01_G003756
PA_chr01_G003761
PA_chr01_G003766
PA_chr01_G003767
PA_chr01_G003776
PA_chr01_G003777
PA_chr01_G003780
PA_chr01_G003785
PA_chr01_G003791
PA_chr01_G003794
PA_chr01_G003797
PA_chr01_G003816
PA_chr01_G003820
PA_chr01_G003824
PA_chr01_G003836
PA_chr01_G003841
PA_chr01_G003842
PA_chr01_G003860
PA_chr01_G003861
PA_chr01_G003891
PA_chr01_G004638
PA_chr01_G004688
PA_chr01_G004698
PA_chr01_G004711
PA_chr01_G004777
PA_chr01_G004779
PA_chr01_G004780
PA_chr01_G004948
PA_chr01_G005145
PA_chr01_G005154
PA_chr01_G005185
PA_chr01_G005186
PA_chr01_G005789
PA_chr01_G005823
PA_chr01_G005871
PA_chr01_G005909
PA_chr01_G006076
PA_chr01_G006080
PA_chr01_G006093
PA_chr01_G006443
PA_chr01_G006692
PA_chr01_G006708
PA_chr01_G007070
PA_chr01_G007214
PA_chr01_G007266
PA_chr02_G000558
PA_chr02_G000764
PA_chr02_G000981
PA_chr02_G002093
PA_chr02_G002329
PA_chr02_G002334
PA_chr02_G002337
PA_chr02_G002518
PA_chr02_G002529
PA_chr02_G002708
PA_chr02_G002895
PA_chr02_G002905
PA_chr02_G002970
PA_chr02_G003121
PA_chr02_G003124
PA_chr02_G003125
PA_chr02_G003139
PA_chr02_G003142
PA_chr02_G003155
PA_chr02_G003162
PA_chr02_G003163
PA_chr02_G003164
PA_chr02_G003180
PA_chr02_G003181
PA_chr02_G003190
PA_chr02_G003197
PA_chr02_G003277
PA_chr02_G003959
PA_chr02_G004092
PA_chr02_G004097
PA_chr02_G004249
PA_chr02_G004454
PA_chr02_G004667
PA_chr02_G004715
PA_chr02_G004740
PA_chr02_G004742
PA_chr02_G004775
PA_chr02_G004776
PA_chr02_G005293
PA_chr02_G005507
PA_chr02_G005729
PA_chr03_G000212
PA_chr03_G000224
PA_chr03_G000256
PA_chr03_G000268
PA_chr03_G000270
PA_chr03_G000271
PA_chr03_G000350
PA_chr03_G000353
PA_chr03_G000398
PA_chr03_G000402
PA_chr03_G001250
PA_chr03_G001267
PA_chr03_G001324
PA_chr03_G001334
PA_chr03_G001542
PA_chr03_G001596
PA_chr03_G001601
PA_chr03_G001618
PA_chr03_G001638
PA_chr03_G001645
PA_chr03_G001647
PA_chr03_G001648
PA_chr03_G001966
PA_chr03_G002086
PA_chr03_G002102
PA_chr03_G002134
PA_chr03_G002247
PA_chr03_G002489
PA_chr03_G002496
PA_chr03_G002497
PA_chr03_G002504
PA_chr03_G002506
PA_chr03_G002508
PA_chr03_G002583
PA_chr03_G002814
PA_chr03_G002817
PA_chr03_G005618
PA_chr03_G005727
PA_chr03_G005748
PA_chr03_G005759
PA_chr03_G005815
PA_chr03_G005949
PA_chr03_G005950
PA_chr03_G005960
PA_chr03_G005964
PA_chr03_G006263
PA_chr03_G006273
PA_chr03_G006367
PA_chr03_G006535
PA_chr03_G006610
PA_chr03_G006687
PA_chr03_G006790
PA_chr03_G007292
PA_chr03_G007420
PA_chr03_G007730
PA_chr03_G007894
PA_chr03_G007895
PA_chr04_G000034
PA_chr04_G000121
PA_chr04_G000476
PA_chr04_G000563
PA_chr04_G000744
PA_chr04_G000763
PA_chr04_G001406
PA_chr04_G001667
PA_chr04_G001708
PA_chr04_G001742
PA_chr04_G001818
PA_chr04_G001819
PA_chr04_G001823
PA_chr04_G001967
PA_chr04_G001982
PA_chr04_G001987
PA_chr04_G002067
PA_chr04_G002301
PA_chr04_G002349
PA_chr04_G002352
PA_chr04_G002930
PA_chr04_G003180
PA_chr04_G003191
PA_chr04_G003199
PA_chr04_G003231
PA_chr04_G003258
PA_chr04_G003283
PA_chr04_G003284
PA_chr04_G003287
PA_chr04_G003288
PA_chr04_G003307
PA_chr04_G003591
PA_chr04_G003921
PA_chr04_G003987
PA_chr04_G004024
PA_chr04_G004304
PA_chr04_G004673
PA_chr04_G004799
PA_chr04_G004800
PA_chr04_G004802
PA_chr04_G004804
PA_chr04_G004805
PA_chr04_G004806
PA_chr04_G004812
PA_chr04_G004813
PA_chr04_G004816
PA_chr04_G004847
PA_chr04_G005086
PA_chr05_G000240
PA_chr05_G000277
PA_chr05_G000282
PA_chr05_G000518
PA_chr05_G000519
PA_chr05_G000610
PA_chr05_G000959
PA_chr05_G001328
PA_chr05_G001337
PA_chr05_G001360
PA_chr05_G001361
PA_chr05_G001440
PA_chr05_G001441
PA_chr05_G001442
PA_chr05_G001443
PA_chr05_G001444
PA_chr05_G001594
PA_chr05_G001897
PA_chr05_G001898
PA_chr05_G001980
PA_chr05_G002209
PA_chr05_G002214
PA_chr05_G002497
PA_chr05_G002511
PA_chr05_G002934
PA_chr05_G002940
PA_chr05_G002956
PA_chr05_G003203
PA_chr05_G003217
PA_chr05_G003427
PA_chr05_G003887
PA_chr05_G004047
PA_chr05_G004054
PA_chr05_G004077
PA_chr05_G004091
PA_chr05_G004094
PA_chr05_G004105
PA_chr05_G004106
PA_chr05_G004124
PA_chr05_G004125
PA_chr05_G004135
PA_chr05_G004195
PA_chr05_G004196
PA_chr05_G004200
PA_chr05_G004248
PA_chr05_G004249
PA_chr05_G004287
PA_chr05_G004311
PA_chr05_G004568
PA_chr05_G004586
PA_chr05_G005097
PA_chr05_G005109
PA_chr05_G005111
PA_chr05_G005201
PA_chr05_G005203
PA_chr05_G005442
PA_chr05_G005461
PA_chr05_G005481
PA_chr06_G000135
PA_chr06_G000149
PA_chr06_G000163
PA_chr06_G000224
PA_chr06_G000363
PA_chr06_G000462
PA_chr06_G000468
PA_chr06_G000477
PA_chr06_G000478
PA_chr06_G000479
PA_chr06_G000729
PA_chr06_G000730
PA_chr06_G000731
PA_chr06_G000750
PA_chr06_G000788
PA_chr06_G000850
PA_chr06_G001025
PA_chr06_G001045
PA_chr06_G001273
PA_chr06_G001502
PA_chr06_G001504
PA_chr06_G001538
PA_chr06_G001637
PA_chr06_G001641
PA_chr06_G001643
PA_chr06_G002019
PA_chr06_G002085
PA_chr06_G002249
PA_chr06_G002250
PA_chr06_G003141
PA_chr06_G003219
PA_chr06_G003220
PA_chr06_G003235
PA_chr06_G003244
PA_chr06_G003246
PA_chr06_G003316
PA_chr06_G003341
PA_chr06_G003346
PA_chr06_G003372
PA_chr06_G003494
PA_chr06_G003573
PA_chr06_G003586
PA_chr06_G003727
PA_chr06_G003753
PA_chr07_G000076
PA_chr07_G000077
PA_chr07_G000090
PA_chr07_G000091
PA_chr07_G000093
PA_chr07_G000105
PA_chr07_G000106
PA_chr07_G000116
PA_chr07_G000127
PA_chr07_G000131
PA_chr07_G000161
PA_chr07_G000177
PA_chr07_G000187
PA_chr07_G000191
PA_chr07_G000233
PA_chr07_G000241
PA_chr07_G000252
PA_chr07_G000266
PA_chr07_G000612
PA_chr07_G000738
PA_chr07_G000857
PA_chr07_G001178
PA_chr07_G001179
PA_chr07_G001255
PA_chr07_G001765
PA_chr07_G001780
PA_chr07_G001784
PA_chr07_G002386
PA_chr07_G002494
PA_chr07_G002824
PA_chr07_G002834
PA_chr07_G003288
PA_chr07_G003296
PA_chr07_G003299
PA_chr07_G003452
PA_chr07_G003473
PA_chr07_G003476
PA_chr07_G003760
PA_chr07_G003761
PA_chr07_G003772
PA_chr07_G003811
PA_chr07_G003875
PA_chr07_G004534
PA_chr07_G004609
PA_chr07_G004756
PA_chr07_G004939
PA_chr07_G005152
PA_chr07_G005163
PA_chr07_G005568
PA_chr07_G005591
PA_chr07_G006004
PA_chr07_G006005
PA_chr07_G006006
PA_chr07_G006043
PA_chr07_G006080
PA_chr08_G001280
PA_chr08_G001282
PA_chr08_G001292
PA_chr08_G001296
PA_chr08_G001301
PA_chr08_G001302
PA_chr08_G001303
PA_chr08_G001307
PA_chr08_G002192
PA_chr08_G002571
PA_chr08_G002572
PA_chr08_G002596
PA_chr08_G002617
PA_chr08_G002656
PA_chr08_G002988
PA_chr08_G002991
PA_chr08_G003040
PA_chr08_G003171
PA_chr08_G003246
PA_chr08_G003326
PA_chr08_G003342
PA_chr08_G003355
PA_chr08_G003466
PA_chr08_G004238
PA_chr08_G004376
PA_chr08_G004380
PA_chr08_G004382
PA_chr08_G004554
PA_chr08_G004605
PA_chr08_G004607
PA_chr08_G004621
PA_chr08_G006592
PA_chr08_G006616
PA_chr08_G006687
PA_chr08_G006935
PA_chr08_G006967
PA_chr08_G006970
PA_chr08_G006983
PA_chr08_G007259
PA_chr08_G007603
PA_chr09_G000055
PA_chr09_G000056
PA_chr09_G000057
PA_chr09_G000068
PA_chr09_G000074
PA_chr09_G000077
PA_chr09_G000099
PA_chr09_G000101
PA_chr09_G000158
PA_chr09_G000189
PA_chr09_G000190
PA_chr09_G000986
PA_chr09_G001130
PA_chr09_G001131
PA_chr09_G001164
PA_chr09_G001558
PA_chr09_G001561
PA_chr09_G001563
PA_chr09_G001565
PA_chr09_G001567
PA_chr09_G001568
PA_chr09_G001701
PA_chr09_G001790
PA_chr09_G001827
PA_chr09_G001829
PA_chr09_G001830
PA_chr09_G001833
PA_chr09_G002100
PA_chr09_G002186
PA_chr09_G002716
PA_chr09_G003033
PA_chr09_G003034
PA_chr09_G003045
PA_chr09_G003094
PA_chr09_G003345
PA_chr09_G003567
PA_chr09_G003568
PA_chr09_G003765
PA_chr09_G004107
PA_chr09_G004115
PA_chr09_G004116
PA_chr09_G004117
PA_chr09_G004219
PA_chr09_G004327
PA_chr09_G004410
PA_chr09_G004421
PA_chr09_G004434
PA_chr09_G004454
PA_chr09_G004455
PA_chr09_G004457
PA_chr09_G004458
PA_chr09_G004464
PA_chr09_G004474
PA_chr09_G004477
PA_chr09_G004610
PA_chr09_G004649
PA_chr09_G004651
PA_chr09_G004708
PA_chr10_G000118
PA_chr10_G000154
PA_chr10_G000209
PA_chr10_G000226
PA_chr10_G000646
PA_chr10_G000732
PA_chr10_G000951
PA_chr10_G000985
PA_chr10_G000986
PA_chr10_G000995
PA_chr10_G001290
PA_chr10_G001401
PA_chr10_G001469
PA_chr10_G002060
PA_chr10_G002124
PA_chr10_G002126
PA_chr10_G002127
PA_chr10_G002136
PA_chr10_G002137
PA_chr10_G002203
PA_chr10_G002219
PA_chr10_G002406
PA_chr10_G002494
PA_chr10_G002498
PA_chr10_G002500
PA_chr10_G002521
PA_chr10_G002931
PA_chr10_G003775
PA_chr10_G004064
PA_chr10_G004312
PA_chr10_G004332
PA_chr10_G004333
PA_chr10_G004365
PA_chr10_G004366
PA_chr10_G004369
PA_chr10_G004465
PA_chr10_G004466
PA_chr10_G004468
PA_chr10_G004469
PA_chr10_G004470
PA_chr10_G004475
PA_chr10_G004477
PA_chr10_G004478
PA_chr10_G004479
PA_chr11_G000002
PA_chr11_G000003
PA_chr11_G000009
PA_chr11_G000013
PA_chr11_G000034
PA_chr11_G000036
PA_chr11_G000049
PA_chr11_G000054
PA_chr11_G000056
PA_chr11_G000059
PA_chr11_G000065
PA_chr11_G000066
PA_chr11_G000067
PA_chr11_G000146
PA_chr11_G000148
PA_chr11_G000168
PA_chr11_G000170
PA_chr11_G000176
PA_chr11_G000178
PA_chr11_G000196
PA_chr11_G000197
PA_chr11_G000265
PA_chr11_G000267
PA_chr11_G000268
PA_chr11_G000275
PA_chr11_G000276
PA_chr11_G000476
PA_chr11_G001041
PA_chr11_G001085
PA_chr11_G001124
PA_chr11_G001137
PA_chr11_G001166
PA_chr11_G001178
PA_chr11_G001471
PA_chr11_G001475
PA_chr11_G001477
PA_chr11_G001562
PA_chr11_G001570
PA_chr11_G001621
PA_chr11_G001646
PA_chr11_G001650
PA_chr11_G001771
PA_chr11_G001944
PA_chr11_G002123
PA_chr11_G002630
PA_chr11_G002769
PA_chr11_G002777
PA_chr11_G002779
PA_chr11_G002804
PA_chr11_G002805
PA_chr11_G003160
PA_chr11_G003172
PA_chr11_G003177
PA_chr11_G003178
PA_chr11_G003180
PA_chr11_G003182
PA_chr11_G003184
PA_chr11_G003186
PA_chr11_G003204
PA_chr11_G003233
PA_chr11_G003363
PA_chr11_G003364
PA_chr11_G003365
PA_chr11_G003366
PA_chr11_G003395
PA_chr11_G003403
PA_chr11_G003409
PA_chr11_G003410
PA_chr11_G003438
PA_chr11_G003440
PA_chr12_G000025
PA_chr12_G000026
PA_chr12_G000081
PA_chr12_G000115
PA_chr12_G000126
PA_chr12_G000131
PA_chr12_G000156
PA_chr12_G000159
PA_chr12_G000173
PA_chr12_G000383
PA_chr12_G000389
PA_chr12_G000396
PA_chr12_G000405
PA_chr12_G000407
PA_chr12_G000408
PA_chr12_G001438
PA_chr12_G001440
PA_chr12_G001442
PA_chr12_G001445
PA_chr12_G001462
PA_chr12_G001467
PA_chr12_G001479
PA_chr12_G001480
PA_chr12_G001637
PA_chr12_G001638
PA_chr12_G001639
PA_chr12_G001652
PA_chr12_G001654
PA_chr12_G001655
PA_chr12_G001656
PA_chr12_G001681
PA_chr12_G001688
PA_chr12_G001693
PA_chr12_G001808
PA_chr12_G001881
PA_chr12_G001909
PA_chr12_G001914
PA_chr12_G001915
PA_chr12_G001925
PA_chr12_G001956
PA_chr12_G001960
PA_chr12_G001966
PA_chr12_G002342
PA_chr12_G002344
PA_chr12_G002345
PA_chr12_G002411
PA_chr12_G002429
PA_chr12_G002454
PA_chr12_G002457
PA_chr12_G002466
PA_chr12_G002820
PA_chr12_G002822
PA_chr12_G002920
PA_chr12_G002951
PA_chr12_G003050
PA_chr12_G003060
PA_chr12_G003078
PA_chr12_G003489
PA_chr12_G003490
PA_chr12_G003506
PA_chr12_G003509
PA_chr12_G003570
PA_chr12_G003680
PA_chr12_G003747
PA_chr12_G003750
PA_chr12_G003891
PA_chr12_G003892
PA_chr12_G004054
PA_chr12_G004239
PA_chr12_G004267
PA_chr12_G004269
PA_chr12_G004318
PA_chr12_G004328
PA_chr12_G004484
PA_chr12_G004485
PA_chr12_G004494
PA_chr12_G004573
PA_chr12_G004576
PA_chr12_G004592
PA_chr12_G004594
PA_chr12_G004600
PA_chr12_G004627
PA_chr12_G004702
PA_chr12_G004816
PA_chr12_G004890
PA_chr12_G004901

## Sheet: gene-id_selected-genes_set-319
PA_chr01_G000108
PA_chr01_G000455
PA_chr01_G000467
PA_chr01_G001102
PA_chr01_G001116
PA_chr01_G001247
PA_chr01_G001402
PA_chr01_G002819
PA_chr01_G003112
PA_chr01_G003113
PA_chr01_G003116
PA_chr01_G003153
PA_chr01_G003154
PA_chr01_G003669
PA_chr01_G003672
PA_chr01_G003709
PA_chr01_G003711
PA_chr01_G003727
PA_chr01_G003730
PA_chr01_G003745
PA_chr01_G003752
PA_chr01_G003761
PA_chr01_G003767
PA_chr01_G003776
PA_chr01_G003780
PA_chr01_G003794
PA_chr01_G003816
PA_chr01_G003824
PA_chr01_G003891
PA_chr01_G004638
PA_chr01_G004688
PA_chr01_G004779
PA_chr01_G004948
PA_chr01_G005823
PA_chr01_G006692
PA_chr01_G007070
PA_chr01_G007214
PA_chr01_G007266
PA_chr02_G002093
PA_chr02_G002329
PA_chr02_G002334
PA_chr02_G002518
PA_chr02_G002708
PA_chr02_G002895
PA_chr02_G002905
PA_chr02_G002970
PA_chr02_G003142
PA_chr02_G003155
PA_chr02_G003162
PA_chr02_G003163
PA_chr02_G003164
PA_chr02_G003180
PA_chr02_G003190
PA_chr02_G003277
PA_chr02_G004092
PA_chr02_G004097
PA_chr02_G004249
PA_chr02_G004454
PA_chr02_G004715
PA_chr02_G004740
PA_chr02_G005507
PA_chr02_G005729
PA_chr03_G000212
PA_chr03_G000224
PA_chr03_G000256
PA_chr03_G000268
PA_chr03_G000270
PA_chr03_G000350
PA_chr03_G000398
PA_chr03_G001324
PA_chr03_G001334
PA_chr03_G001542
PA_chr03_G001596
PA_chr03_G001601
PA_chr03_G001645
PA_chr03_G001647
PA_chr03_G001648
PA_chr03_G001966
PA_chr03_G002086
PA_chr03_G002102
PA_chr03_G002134
PA_chr03_G002489
PA_chr03_G002496
PA_chr03_G002497
PA_chr03_G002506
PA_chr03_G002583
PA_chr03_G002814
PA_chr03_G005618
PA_chr03_G005727
PA_chr03_G005748
PA_chr03_G005949
PA_chr03_G005950
PA_chr03_G005964
PA_chr03_G006263
PA_chr03_G006273
PA_chr03_G006367
PA_chr03_G006610
PA_chr03_G007292
PA_chr03_G007420
PA_chr03_G007730
PA_chr03_G007895
PA_chr04_G000034
PA_chr04_G000121
PA_chr04_G000476
PA_chr04_G001406
PA_chr04_G001742
PA_chr04_G001982
PA_chr04_G002301
PA_chr04_G002349
PA_chr04_G002352
PA_chr04_G003191
PA_chr04_G003231
PA_chr04_G003288
PA_chr04_G003307
PA_chr04_G003987
PA_chr04_G004802
PA_chr04_G004804
PA_chr04_G004847
PA_chr05_G000518
PA_chr05_G000959
PA_chr05_G001980
PA_chr05_G002209
PA_chr05_G002497
PA_chr05_G002511
PA_chr05_G002934
PA_chr05_G002940
PA_chr05_G002956
PA_chr05_G003203
PA_chr05_G003427
PA_chr05_G004077
PA_chr05_G004105
PA_chr05_G004106
PA_chr05_G004196
PA_chr05_G004249
PA_chr05_G004568
PA_chr05_G004586
PA_chr05_G005109
PA_chr05_G005201
PA_chr05_G005461
PA_chr05_G005481
PA_chr06_G000149
PA_chr06_G000224
PA_chr06_G000363
PA_chr06_G000468
PA_chr06_G000478
PA_chr06_G000479
PA_chr06_G000729
PA_chr06_G000731
PA_chr06_G001273
PA_chr06_G001502
PA_chr06_G001504
PA_chr06_G001637
PA_chr06_G001643
PA_chr06_G002249
PA_chr06_G002250
PA_chr06_G003316
PA_chr06_G003341
PA_chr06_G003573
PA_chr06_G003586
PA_chr06_G003753
PA_chr07_G000076
PA_chr07_G000090
PA_chr07_G000105
PA_chr07_G000106
PA_chr07_G000161
PA_chr07_G000177
PA_chr07_G000187
PA_chr07_G000241
PA_chr07_G000266
PA_chr07_G000738
PA_chr07_G001178
PA_chr07_G001780
PA_chr07_G002494
PA_chr07_G002824
PA_chr07_G002834
PA_chr07_G003288
PA_chr07_G003296
PA_chr07_G003760
PA_chr07_G003772
PA_chr07_G003811
PA_chr07_G003875
PA_chr07_G004534
PA_chr07_G004609
PA_chr07_G005163
PA_chr07_G005568
PA_chr07_G005591
PA_chr07_G006004
PA_chr07_G006005
PA_chr07_G006006
PA_chr07_G006043
PA_chr07_G006080
PA_chr08_G001301
PA_chr08_G002192
PA_chr08_G002571
PA_chr08_G002617
PA_chr08_G002656
PA_chr08_G003326
PA_chr08_G003355
PA_chr08_G004238
PA_chr08_G004376
PA_chr08_G004380
PA_chr08_G004382
PA_chr08_G004605
PA_chr08_G004621
PA_chr08_G006935
PA_chr08_G006967
PA_chr08_G007259
PA_chr09_G000055
PA_chr09_G000056
PA_chr09_G000057
PA_chr09_G000074
PA_chr09_G000099
PA_chr09_G000189
PA_chr09_G001131
PA_chr09_G001563
PA_chr09_G001567
PA_chr09_G001568
PA_chr09_G001790
PA_chr09_G001829
PA_chr09_G001830
PA_chr09_G002100
PA_chr09_G002716
PA_chr09_G003034
PA_chr09_G003045
PA_chr09_G003094
PA_chr09_G004107
PA_chr09_G004117
PA_chr09_G004327
PA_chr09_G004410
PA_chr09_G004421
PA_chr09_G004434
PA_chr09_G004454
PA_chr09_G004457
PA_chr09_G004458
PA_chr09_G004464
PA_chr09_G004477
PA_chr09_G004651
PA_chr09_G004708
PA_chr10_G000154
PA_chr10_G000209
PA_chr10_G000226
PA_chr10_G000732
PA_chr10_G000995
PA_chr10_G002124
PA_chr10_G002126
PA_chr10_G002127
PA_chr10_G002203
PA_chr10_G002219
PA_chr10_G002494
PA_chr10_G004312
PA_chr10_G004369
PA_chr10_G004466
PA_chr10_G004469
PA_chr10_G004475
PA_chr10_G004478
PA_chr11_G000003
PA_chr11_G000009
PA_chr11_G000013
PA_chr11_G000034
PA_chr11_G000056
PA_chr11_G000146
PA_chr11_G000168
PA_chr11_G000178
PA_chr11_G000275
PA_chr11_G001041
PA_chr11_G001085
PA_chr11_G001124
PA_chr11_G001137
PA_chr11_G001475
PA_chr11_G001646
PA_chr11_G001771
PA_chr11_G002123
PA_chr11_G002777
PA_chr11_G002779
PA_chr11_G002804
PA_chr11_G003160
PA_chr11_G003172
PA_chr11_G003177
PA_chr11_G003178
PA_chr11_G003182
PA_chr11_G003184
PA_chr11_G003364
PA_chr11_G003365
PA_chr11_G003366
PA_chr11_G003403
PA_chr11_G003438
PA_chr12_G000081
PA_chr12_G000131
PA_chr12_G000159
PA_chr12_G000389
PA_chr12_G000405
PA_chr12_G001440
PA_chr12_G001445
PA_chr12_G001637
PA_chr12_G001652
PA_chr12_G001656
PA_chr12_G001688
PA_chr12_G001960
PA_chr12_G002342
PA_chr12_G002345
PA_chr12_G002429
PA_chr12_G002454
PA_chr12_G002457
PA_chr12_G002466
PA_chr12_G002920
PA_chr12_G002951
PA_chr12_G003489
PA_chr12_G003570
PA_chr12_G004054
PA_chr12_G004239
PA_chr12_G004318
PA_chr12_G004484
PA_chr12_G004592
PA_chr12_G004594
PA_chr12_G004600
PA_chr12_G004627
PA_chr12_G004702
PA_chr12_G004816
PA_chr12_G004890
