# Supplementary material for: 1000 conifer genomes: Genome innovation, organisation and diversity
Source: Research Square preprint supplement (doi:10.21203/rs.3.rs-6502828/v1), 2025-05-26
Supplement: Supplementary file 4 [file f08ba9870c12f3f1c67727a7.xlsx]

## Sheet: in
ENA biosample accession	Internal ID	VCF ID	Population type	Latituted	Longitude	Mapping coverage
SAMEA114604449		Diploid	Reference	63.3	15.98	41.7476
SAMEA1906672		Haploid_ERX242654	Reference	63.3	15.98	33.5618
SAMN10388286		P_engelmannii	Outgroup			35.5537
SAMN01120252		P_glauca	Outgroup			20.8512
SAMN04296985		P_sitchensis	Outgroup			14.7842
SAMEA6526532	Pab001	P267-101	Outgroup	62	129.6	5.99722
SAMEA6526533	Pab002	P267-105	RangeWide	57.2	15.1	23.7019
SAMEA6526534	Pab003	P267-102	RangeWide	55.1	30.1	6.11468
SAMEA6526535	Pab004	P267-103	RangeWide	51.1	20.5	6.78072
SAMEA6526536	Pab005	P267-104	RangeWide	46.6	25.1	5.48406
SAMEA6526538	Pab007	P8109-101	RangeWide	65.6	14	8.26122
SAMEA6526539	Pab008	P8109-102	RangeWide	66.5	25.7	7.49439
SAMEA6526540	Pab009	P8109-103	RangeWide	67.5	24.9	8.44914
SAMEA6526541	Pab010	P8109-104	RangeWide	64.9	28.9	7.58913
SAMEA6526542	Pab011	P8109-105	RangeWide	59.7	11.4	9.43516
SAMEA6526543	Pab012	P8109-106	RangeWide	63.7	11.3	8.02226
SAMEA6526544	Pab013	P8109-107	RangeWide	65.6	13.4	8.69448
SAMEA6526545	Pab014	P8109-108	RangeWide	63.1	11.7	8.04368
SAMEA6526546	Pab015	P8109-109	RangeWide	60.7	24.4	8.7096
SAMEA6526547	Pab016	P9904-101	RangeWide	65.1	15.4	12.6758
SAMEA6526548	Pab017	P9904-102	RangeWide	65.1	15.4	12.4131
SAMEA6526549	Pab018	P9904-103	RangeWide	65.1	15.4	12.4375
SAMEA6526550	Pab019	P9904-104	RangeWide	65.1	15.4	12.6655
SAMEA6526551	Pab020	P9904-105	RangeWide	65.1	15.4	11.9845
SAMEA6526552	Pab021	P9904-106	RangeWide	65.1	15.4	12.3315
SAMEA6526553	Pab022	P9904-107	RangeWide	65.1	15.4	12.2696
SAMEA6526554	Pab023	P9904-108	RangeWide	65.1	15.4	12.1283
SAMEA6526555	Pab024	P9904-109	RangeWide	65.1	15.4	12.1362
SAMEA6526556	Pab025	P9904-110	RangeWide	65.1	15.4	7.57105
SAMEA6526557	Pab026	P9904-111	RangeWide	63.7	19.5	11.9474
SAMEA6526558	Pab027	P9904-112	RangeWide	63.7	19.5	10.3237
SAMEA6526559	Pab028	P9904-113	RangeWide	63.7	19.5	11.5902
SAMEA6526560	Pab029	P9904-114	RangeWide	63.7	19.5	9.41802
SAMEA6526561	Pab030	P9904-115	RangeWide	63.7	19.5	10.6885
SAMEA6526562	Pab031	P9904-116	RangeWide	63.7	19.5	11.1923
SAMEA6526563	Pab032	P9904-117	RangeWide	63.7	19.5	12.584
SAMEA6526564	Pab033	P9904-118	RangeWide	63.7	19.5	12.8436
SAMEA6526565	Pab034	P9904-119	RangeWide	63.7	19.5	12.3437
SAMEA6526566	Pab035	P9904-120	RangeWide	63.7	19.5	11.5728
SAMEA117959564	09049/1	P.obovata_P24355	Outgroup	51.96	101.87	33.2762
SAMEA117851081	OB_564	P24354-109	RangeWide	58	65.3	7.29192
SAMEA117851080	HUN_B3_59_2	P24354-108	RangeWide	54.3	41	8.30525
SAMEA117851079	B3-0_2	P24354-107	RangeWide	53.8	30.3	8.44675
SAMEA117851078	NR_32	P24354-106	RangeWide	60.7	50.28	8.13935
SAMEA117851077	NR_25	P24354-105	RangeWide	62.37	52.42	8.78562
SAMEA117851076	NR_24	P24354-104	RangeWide	62.62	57.47	9.95489
SAMEA117851075	NR_30	P24354-103	RangeWide	61.27	53.63	9.90945
SAMEA117851074	NR_19	P24354-102	RangeWide	63.7	48.53	7.31642
SAMEA117851073	NR_18	P24354-101	RangeWide	64	54.58	9.6844
SAMEA117851072	H_1078	P22451-251	BreedingPopulation	63.58	18.12	2.23799
SAMEA117851071	H_804	P22451-250	BreedingPopulation	64.3	17.4	2.33857
SAMEA117851070	H_728	P22451-249	BreedingPopulation	64.2	17.58	2.44163
SAMEA117851069	H_674	P22451-248	BreedingPopulation	63.28	15.98	2.25901
SAMEA117851068	H_311	P22451-247	BreedingPopulation	64.33	20.33	2.24037
SAMEA117851067	H_265	P22451-246	BreedingPopulation	61.95	16.28	2.24684
SAMEA117851066	S-H_1397	P22451-245	BreedingPopulation	67.23	24.45	2.17334
SAMEA117851065	S-H_1396	P22451-244	BreedingPopulation	64.22	20.12	2.19389
SAMEA117851064	S-H_1395	P22451-243	BreedingPopulation	63.53	17.5	2.47474
SAMEA117851063	S-H_1394	P22451-242	BreedingPopulation	63.8	16.45	2.19723
SAMEA117851062	S-H_1393	P22451-241	BreedingPopulation	66.9323	20.7197	2.29266
SAMEA117851061	S-H_1392	P22451-240	BreedingPopulation	64.28	17.4	2.22036
SAMEA117851060	S-H_1391	P22451-239	BreedingPopulation	63.63	14.43	2.28623
SAMEA117851059	S-H_1390	P22451-238	BreedingPopulation	61.95	16.38	2.21841
SAMEA117851058	S-H_1389	P22451-237	BreedingPopulation	63.82	17.57	2.29701
SAMEA117851057	S-H_1388	P22451-236	BreedingPopulation	64.3	17.4	2.20311
SAMEA117851056	S-H_1387	P22451-235	BreedingPopulation	64.28	14.92	2.23378
SAMEA117851055	S-H_1386	P22451-234	BreedingPopulation	64.67	16.6	2.29958
SAMEA117851054	S-H_1385	P22451-233	BreedingPopulation	63.63	14.43	2.24764
SAMEA117851053	S-H_1384	P22451-232	BreedingPopulation	63.83	14.3	2.28099
SAMEA117851052	S-H_1383	P22451-231	BreedingPopulation	63.8	14.83	2.23841
SAMEA117851051	S-H_1382	P22451-230	BreedingPopulation	64.3	17.4	2.33567
SAMEA117851050	S-H_1381	P22451-229	BreedingPopulation	63.8	14.83	2.242
SAMEA117851049	S-H_1380	P22451-228	BreedingPopulation	63.82	17.57	2.20482
SAMEA117851048	S-H_1379	P22451-227	BreedingPopulation	64.15	18.67	2.34651
SAMEA117851047	S-H_1378	P22451-226	BreedingPopulation	64.15	18.67	2.20692
SAMEA117851046	S-H_1377	P22451-225	BreedingPopulation	64.18	20.05	2.25338
SAMEA117851045	S-H_1376	P22451-224	BreedingPopulation	63.83	17.77	2.32584
SAMEA117851044	S-H_1375	P22451-223	BreedingPopulation	64	17.65	2.54965
SAMEA117851043	S-H_1374	P22451-222	BreedingPopulation	64.18	19.58	2.42593
SAMEA117851042	S-H_1373	P22451-221	BreedingPopulation	66.73	21.63	2.215
SAMEA117851041	S-H_1372	P22451-220	BreedingPopulation	66.37	26.72	2.17357
SAMEA117851040	S-H_1371	P22451-219	BreedingPopulation	64.28	17.4	2.25558
SAMEA117851039	S-H_1370	P22451-218	BreedingPopulation	63.7	16.92	2.28316
SAMEA117851038	S-H_1369	P22451-217	BreedingPopulation	64.45	16.98	2.29923
SAMEA117851037	S-H_1368	P22451-216	BreedingPopulation	64.45	18.17	2.33472
SAMEA117851036	S-H_1367	P22451-215	BreedingPopulation	65.22	16.47	2.16503
SAMEA117851035	S-H_1366	P22451-214	BreedingPopulation	63.8	14.83	2.29646
SAMEA117851034	S-H_1364	P22451-213	BreedingPopulation	63.63	15.08	2.24708
SAMEA117851033	S-H_1363	P22451-212	BreedingPopulation	62.63	15.05	2.28775
SAMEA117851032	S-H_1362	P22451-211	BreedingPopulation	64	16	2.42817
SAMEA117851031	S-H_1361	P22451-210	BreedingPopulation	63.83	17.77	2.4184
SAMEA117851030	S-H_1360	P22451-209	BreedingPopulation	67.5778	22.2879	2.12904
SAMEA117851029	S-H_1359	P22451-208	BreedingPopulation	63.7	18.37	2.23618
SAMEA117851028	S-H_1358	P22451-207	BreedingPopulation	63.25	17.65	2.20977
SAMEA117851027	S-H_1357	P22451-206	BreedingPopulation	63.8	14.83	2.30574
SAMEA117851026	S-H_1356	P22451-205	BreedingPopulation	63.82	17.78	2.273
SAMEA117851025	S-H_1355	P22451-204	BreedingPopulation	59.8483	15.0942	2.22093
SAMEA117851024	S-H_1354	P22451-203	BreedingPopulation	63.1852	13.631	2.28067
SAMEA117851023	S-H_1353	P22451-202	BreedingPopulation	63.83	17.55	2.30802
SAMEA117851022	S-H_1352	P22451-201	BreedingPopulation	64.28	17.4	2.07828
SAMEA117851021	S-H_1351	P22451-196	BreedingPopulation	63.5	13.82	2.29374
SAMEA117851020	S-H_1339	P22451-195	BreedingPopulation	64	17.65	2.36509
SAMEA117851019	S-H_1327	P22451-194	BreedingPopulation	62.6722	16.9116	2.34751
SAMEA117851018	S-H_1315	P22451-193	BreedingPopulation	64.15	18.67	2.33008
SAMEA117851017	S-H_1303	P22451-192	BreedingPopulation	63.8644	19.7993	2.27532
SAMEA117851016	S-H_1291	P22451-191	BreedingPopulation	61.278	14.5409	2.4949
SAMEA117851015	S-H_1279	P22451-190	BreedingPopulation	66.358	22.4111	2.49022
SAMEA117851014	S-H_1267	P22451-189	BreedingPopulation	66.68	22.65	2.37883
SAMEA117851013	S-H_1350	P22451-188	BreedingPopulation	63.82	17.57	2.36011
SAMEA117851012	S-H_1338	P22451-187	BreedingPopulation			2.41708
SAMEA117851011	S-H_1326	P22451-186	BreedingPopulation	64.45	18.17	2.3989
SAMEA117851010	S-H_1314	P22451-185	BreedingPopulation	66.73	21.63	2.21492
SAMEA117851009	S-H_1302	P22451-184	BreedingPopulation	62.92	17.33	2.34558
SAMEA117851008	S-H_1290	P22451-183	BreedingPopulation	63.63	15.08	2.50246
SAMEA117851007	S-H_1278	P22451-182	BreedingPopulation	64.45	18.17	2.47196
SAMEA117851006	S-H_1266	P22451-181	BreedingPopulation	64.85	29.58	2.32479
SAMEA117851005	S-H_1349	P22451-180	BreedingPopulation	64.3	17.4	2.40522
SAMEA117851004	S-H_1337	P22451-179	BreedingPopulation	63.2156	15.974	2.33237
SAMEA117851003	S-H_1325	P22451-178	BreedingPopulation	65.6951	19.3486	2.25522
SAMEA117851002	S-H_1313	P22451-177	BreedingPopulation	65.3651	18.5737	2.38195
SAMEA117851001	S-H_1301	P22451-176	BreedingPopulation	63.63	14.43	2.28807
SAMEA117851000	S-H_1289	P22451-175	BreedingPopulation	64.57	19.17	2.36066
SAMEA117850999	S-H_1277	P22451-174	BreedingPopulation	66.5341	20.8009	2.49188
SAMEA117850998	S-H_1265	P22451-173	BreedingPopulation	60.8107	14.6733	2.48767
SAMEA117850997	S-H_1348	P22451-172	BreedingPopulation	63.83	17.55	2.58469
SAMEA117850996	S-H_1336	P22451-171	BreedingPopulation	61.8455	13.7446	2.25718
SAMEA117850995	S-H_1324	P22451-170	BreedingPopulation	63.63	14.43	2.45963
SAMEA117850994	S-H_1312	P22451-169	BreedingPopulation	61.7772	16.3773	2.25369
SAMEA117850993	S-H_1300	P22451-168	BreedingPopulation	58.5717	14.4285	2.22927
SAMEA117850992	S-H_1288	P22451-167	BreedingPopulation	63.53	17.5	2.28545
SAMEA117850991	S-H_1276	P22451-166	BreedingPopulation	64.4077	20.4194	2.26375
SAMEA117850990	S-H_1264	P22451-165	BreedingPopulation	63.2	17.15	2.31876
SAMEA117850989	S-H_1347	P22451-164	BreedingPopulation	64.3	17.4	2.37685
SAMEA117850988	S-H_1335	P22451-163	BreedingPopulation	64.22	20.12	2.3185
SAMEA117850987	S-H_1323	P22451-162	BreedingPopulation	63.25	17.65	2.32807
SAMEA117850986	S-H_1311	P22451-161	BreedingPopulation	66.28	23.72	2.32693
SAMEA117850985	S-H_1299	P22451-160	BreedingPopulation	63.88	15.28	2.37188
SAMEA117850984	S-H_1287	P22451-159	BreedingPopulation	59.8668	17.9232	2.93238
SAMEA117850983	S-H_1275	P22451-158	BreedingPopulation	66.4334	23.2655	2.29646
SAMEA117850982	S-H_1263	P22451-157	BreedingPopulation	64.28	14.93	2.45659
SAMEA117850981	S-H_1346	P22451-156	BreedingPopulation	67.182	23.2861	2.42018
SAMEA117850980	S-H_1334	P22451-155	BreedingPopulation	65.8642	22.9746	2.35575
SAMEA117850979	S-H_1322	P22451-154	BreedingPopulation	63.63	15.08	2.34552
SAMEA117850978	S-H_1310	P22451-153	BreedingPopulation	63.82	17.78	2.29111
SAMEA117850977	S-H_1298	P22451-152	BreedingPopulation	63.7	16.92	2.39616
SAMEA117850976	S-H_1286	P22451-151	BreedingPopulation	67.72	26.05	2.20969
SAMEA117850975	S-H_1274	P22451-150	BreedingPopulation	66.1738		2.24527
SAMEA117850974	S-H_1262	P22451-149	BreedingPopulation	64.15	18.67	2.3375
SAMEA117850973	S-H_1345	P22451-148	BreedingPopulation	63.7	18.37	2.53478
SAMEA117850972	S-H_1333	P22451-147	BreedingPopulation	62.5149	14.2131	2.49376
SAMEA117850971	S-H_1321	P22451-146	BreedingPopulation	59.1939	12.9657	2.55566
SAMEA117850970	S-H_1309	P22451-145	BreedingPopulation	66.68	22.65	2.20343
SAMEA117850969	S-H_1297	P22451-144	BreedingPopulation	62.92	17.5	2.45959
SAMEA117850967	S-H_1285	P22451-143	BreedingPopulation	61.62	16.48	2.2455
SAMEA117850966	S-H_1273	P22451-142	BreedingPopulation	61.7245		2.5706
SAMEA117850965	S-H_1261	P22451-141	BreedingPopulation	60.4508		2.28595
SAMEA117850964	S-H_1344	P22451-140	BreedingPopulation	63.25	17.65	2.54716
SAMEA117850963	S-H_1332	P22451-139	BreedingPopulation	61	13.3	2.33869
SAMEA117850962	S-H_1320	P22451-138	BreedingPopulation	63.75	16.6	2.40235
SAMEA117850961	S-H_1308	P22451-137	BreedingPopulation	63.82	17.62	2.37014
SAMEA117850960	S-H_1296	P22451-136	BreedingPopulation	63.83	17.77	2.31085
SAMEA117850959	S-H_1284	P22451-135	BreedingPopulation	63.83	17.77	2.41607
SAMEA117850958	S-H_1272	P22451-134	BreedingPopulation	59.2264	16.1248	2.31395
SAMEA117850957	S-H_1260	P22451-133	BreedingPopulation	64	17.65	2.35448
SAMEA117850956	S-H_1343	P22451-132	BreedingPopulation	64.15	18.67	2.41264
SAMEA117850955	S-H_1331	P22451-131	BreedingPopulation	65.1447	18.0399	2.48747
SAMEA117850954	S-H_1319	P22451-130	BreedingPopulation	63.2	17.15	2.51881
SAMEA117850953	S-H_1307	P22451-129	BreedingPopulation	63.82	17.78	2.31342
SAMEA117850952	S-H_1295	P22451-128	BreedingPopulation	62.92	17.83	2.34621
SAMEA117850951	S-H_1283	P22451-127	BreedingPopulation	62.92	17.33	2.45605
SAMEA117850950	S-H_1271	P22451-126	BreedingPopulation	63.82	17.78	2.36822
SAMEA117850949	S-H_1259	P22451-125	BreedingPopulation	64.4684	18.6481	2.27155
SAMEA117850948	S-H_1342	P22451-124	BreedingPopulation	61.95	16.38	2.29808
SAMEA117850947	S-H_1330	P22451-123	BreedingPopulation	63.82	17.78	2.33456
SAMEA117850946	S-H_1318	P22451-122	BreedingPopulation	64.3	17.4	2.38779
SAMEA117850945	S-H_1306	P22451-121	BreedingPopulation	63.2	17.15	2.26239
SAMEA117850944	S-H_1294	P22451-120	BreedingPopulation	63.82	17.78	2.44762
SAMEA117850943	S-H_1282	P22451-119	BreedingPopulation	58.4679	16.6842	2.3009
SAMEA117850942	S-H_1270	P22451-118	BreedingPopulation	66.68	22.65	2.22628
SAMEA117850941	S-H_1258	P22451-117	BreedingPopulation	65.149		2.29476
SAMEA117850940	S-H_1341	P22451-116	BreedingPopulation	63.03	15.58	2.36528
SAMEA117850939	S-H_1329	P22451-115	BreedingPopulation	63.7	16.92	2.51952
SAMEA117850938	S-H_1317	P22451-114	BreedingPopulation	63.47	15.5	2.42842
SAMEA117850937	S-H_1305	P22451-113	BreedingPopulation	63.7	18.37	2.3077
SAMEA117850936	S-H_1293	P22451-112	BreedingPopulation	63.83	17.77	2.35415
SAMEA117850935	S-H_1281	P22451-111	BreedingPopulation	63.9437	16.8238	2.92543
SAMEA117850934	S-H_1269	P22451-110	BreedingPopulation	64.084		2.61238
SAMEA117850933	S-H_1257	P22451-109	BreedingPopulation	60.6731	12.9653	2.36949
SAMEA117850932	S-H_1340	P22451-108	BreedingPopulation	63.7	18.37	2.29587
SAMEA117850931	S-H_1328	P22451-107	BreedingPopulation	63.48	17.67	2.33389
SAMEA117850930	S-H_1316	P22451-106	BreedingPopulation	64.45	18.17	2.38397
SAMEA117850929	S-H_1304	P22451-105	BreedingPopulation	63.7	16.92	2.36901
SAMEA117850928	S-H_1292	P22451-104	BreedingPopulation	62.43	16.85	2.37999
SAMEA117850927	S-H_1280	P22451-103	BreedingPopulation	61.0917	16.2166	2.25945
SAMEA117850926	S-H_1268	P22451-102	BreedingPopulation	64.22	20.12	2.27414
SAMEA117850925	S-H_1247	P22451-101	BreedingPopulation	63.47	15.5	2.32274
SAMEA117850924	ACR_16H311	P21002-142	RangeWide			20.7671
SAMEA117850923	BOR	P21002-141	RangeWide			21.3833
SAMEA117850922	PEL	P21002-140	RangeWide			22.2189
SAMEA117850921	TAR	P21002-139	RangeWide			22.051
SAMEA117850920	ORM	P21002-138	RangeWide			22.128
SAMEA117850919	SMU	P21002-137	RangeWide			22.048
SAMEA117850918	GUL	P21002-136	RangeWide			21.7492
SAMEA117850917	SOC	P21002-135	RangeWide			22.058
SAMEA117850916	KRY	P21002-134	RangeWide			21.9053
SAMEA117850915	KAM	P21002-133	RangeWide			21.9603
SAMEA117850914	L33040	P21002-132	RangeWide	50.4	6.3	8.57765
SAMEA117850913	L33039	P21002-131	RangeWide	49.7	15.8	8.60908
SAMEA117850912	L33035	P21002-130	RangeWide	62.1	28.2	7.68372
SAMEA117850911	L33030	P21002-129	RangeWide	60	10.7	7.39678
SAMEA117850910	L33029	P21002-128	RangeWide	41.5	24.3	7.13768
SAMEA117850909	L33028	P21002-127	RangeWide	46.5	8.7	8.12969
SAMEA117850908	L33027	P21002-126	RangeWide	47.5	14.6	7.85597
SAMEA117850907	L955	P21002-125	RangeWide	47.6	10.8	7.51308
SAMEA117850906	L938	P21002-124	RangeWide	47.6	11.8	8.69645
SAMEA117850905	L923	P21002-123	RangeWide	48.6	14.7	8.20191
SAMEA117850904	L904	P21002-122	RangeWide	48	11.1	8.56052
SAMEA117850903	L894	P21002-121	RangeWide	49.6	19.6	9.07672
SAMEA117850902	L887	P21002-120	RangeWide	49.4	13	8.04241
SAMEA117850901	L883	P21002-119	RangeWide	49.9	19.2	8.29016
SAMEA117850900	L856	P21002-118	RangeWide	47.3	11.1	7.8333
SAMEA117850899	L830	P21002-117	RangeWide	50.5	11.1	8.25688
SAMEA117850898	L825	P21002-116	RangeWide	47.6	13	7.66971
SAMEA117850897	L823	P21002-115	RangeWide	49.2	12.7	8.33351
SAMEA117850896	L786	P21002-114	RangeWide	47.1	14	8.07751
SAMEA117850895	L777	P21002-113	RangeWide	49.7	16.3	8.33306
SAMEA117850894	L776	P21002-112	RangeWide	49.4	20.8	7.82696
SAMEA117850893	L727	P21002-111	RangeWide	48.4	9.5	8.45317
SAMEA117850892	L726	P21002-110	RangeWide	59.1	12.5	7.76119
SAMEA117850891	L725	P21002-109	RangeWide	59.8	15.6	8.20909
SAMEA117850890	L721	P21002-108	RangeWide	63	16.7	8.56785
SAMEA117850889	L716	P21002-107	RangeWide	49.8	12.8	8.19093
SAMEA117850888	L713	P21002-106	RangeWide	56.2	23	8.38067
SAMEA117850887	L83	P21002-105	RangeWide	48	11.4	8.49163
SAMEA117850886	L58	P21002-104	RangeWide	49.3	15.8	8.94433
SAMEA117850885	L39	P21002-103	RangeWide	61.3	25.3	8.16529
SAMEA117850884	L20	P21002-102	RangeWide	47.7	11.8	8.26335
SAMEA117850883	L4	P21002-101	RangeWide	49.1	12	8.05509
SAMEA117850882	L33062	P17553-596	RangeWide	47.2	14.4	7.28542
SAMEA117850881	L33061	P17553-595	RangeWide	47.1	15.1	5.83781
SAMEA117850880	L33060	P17553-594	RangeWide	45.1	4	5.93911
SAMEA117850879	L33059	P17553-593	RangeWide	64	19.1	7.21923
SAMEA117850878	L33058	P17553-592	RangeWide	55.5	25.2	2.62137
SAMEA117850877	L33057	P17553-591	RangeWide	49.2	20.2	3.12182
SAMEA117850876	L33056	P17553-590	RangeWide	47	12.5	3.16756
SAMEA117850875	L33055	P17553-589	RangeWide	49.1	13.2	6.96552
SAMEA117850874	L33054	P17553-588	RangeWide	47.3	13.6	2.48563
SAMEA117850873	L33053	P17553-587	RangeWide	60.3	10.8	5.77484
SAMEA117850872	L33052	P17553-586	RangeWide	47.5	11.1	2.86053
SAMEA117850871	L33051	P17553-585	RangeWide	53.3	15.8	3.14552
SAMEA117850870	L33050	P17553-584	RangeWide	60	10.7	6.1736
SAMEA117850869	L2477	P17553-583	RangeWide	47.5	16	5.7511
SAMEA117850868	L2369	P17553-582	RangeWide	49.3	9.2	3.06686
SAMEA117850867	L2326	P17553-581	RangeWide	48.6	8.4	1.83065
SAMEA117850866	L2325	P17553-580	RangeWide	49.7	17.1	2.50621
SAMEA117850865	L2324	P17553-579	RangeWide	57.8	13.8	3.03882
SAMEA117850864	L2281	P17553-578	RangeWide	56.1	27.5	2.89695
SAMEA117850863	L2240	P17553-577	RangeWide	56.7	22.7	2.57608
SAMEA117850862	L2234	P17553-576	RangeWide	51.8	10.2	6.35884
SAMEA117850861	L2212	P17553-575	RangeWide	45.1	4	2.36454
SAMEA117850860	L2168	P17553-574	RangeWide	47.5	14.1	2.76994
SAMEA117850859	L2150	P17553-573	RangeWide	48.9	20.2	3.08863
SAMEA117850858	L2109	P17553-572	RangeWide	48.1	8.8	5.55333
SAMEA117850857	L2104	P17553-571	RangeWide	49.1	20.3	2.73954
SAMEA117850856	L2039	P17553-570	RangeWide	49.6	17.7	4.10132
SAMEA117850855	L2037	P17553-569	RangeWide	46.9	16.1	4.69111
SAMEA117850854	L1979	P17553-568	RangeWide	59.2	17.9	4.50681
SAMEA117850853	L1934	P17553-567	RangeWide	49.8	12	1.06105
SAMEA117850852	L1810	P17553-566	RangeWide	63.9	16.3	2.05275
SAMEA117850851	L1809	P17553-565	RangeWide	49.5	18.4	6.35886
SAMEA117850850	L1775	P17553-564	RangeWide	48.9	14.9	7.21208
SAMEA117850849	L1772	P17553-563	RangeWide	47.8	12.5	2.43882
SAMEA117850848	L1767	P17553-562	RangeWide	48.5	12	8.45634
SAMEA117850847	L1694	P17553-561	RangeWide	58.1	25.3	6.25888
SAMEA117850846	L1591	P17553-560	RangeWide	51.8	10.2	5.99969
SAMEA117850845	L1533	P17553-559	RangeWide	48.8	10.1	2.66363
SAMEA117850844	L1435	P17553-558	RangeWide	47.8	10.3	3.33723
SAMEA117850843	L529	P17553-557	RangeWide	48	15.5	2.87219
SAMEA117850842	L385	P17553-556	RangeWide	49.1	16.3	2.57483
SAMEA117850841	L361	P17553-555	RangeWide	51.3	8.7	3.41228
SAMEA117850840	L335	P17553-554	RangeWide	48.5	8.6	3.02526
SAMEA117850839	L254	P17553-553	RangeWide	49.4	19.1	3.05991
SAMEA117850838	L226	P17553-552	RangeWide	47.5	15.4	2.37416
SAMEA117850837	L207	P17553-551	RangeWide	50.9	7.7	3.21584
SAMEA117850836	L200	P17553-550	RangeWide	51.8	10.2	3.73123
SAMEA117850835	L197	P17553-549	RangeWide	49.5	15.2	3.62669
SAMEA117850834	L189	P17553-548	RangeWide	47.9	8.5	2.94349
SAMEA117850833	L156	P17553-547	RangeWide	46	6.6	3.18681
SAMEA117850832	L140	P17553-546	RangeWide	50.1	12.5	5.66776
SAMEA117850831	L138	P17553-545	RangeWide	59.4	13.5	4.83885
SAMEA117850830	L123	P17553-544	RangeWide	54.3	22.8	2.89945
SAMEA117850829	L118	P17553-543	RangeWide	50.3	16.6	2.27084
SAMEA117850828	L113	P17553-542	RangeWide	59.6	15.5	3.38993
SAMEA117850827	L2752	P17553-541	RangeWide	47.7	10.2	2.69322
SAMEA117850826	L107	P17553-540	RangeWide	49.1	13.3	5.73037
SAMEA117850825	L102	P17553-539	RangeWide	47.4	11.2	3.2558
SAMEA117850824	L101	P17553-538	RangeWide	47.8	12.5	2.94056
SAMEA117850823	L100	P17553-537	RangeWide	53.7	16.8	2.26013
SAMEA117850822	L99	P17553-536	RangeWide	47.8	11	3.07438
SAMEA117850821	L95	P17553-535	RangeWide	54.2	16	2.55888
SAMEA117850820	L94	P17553-534	RangeWide	48.1	12	2.39754
SAMEA117850819	L89	P17553-533	RangeWide	47.2	15.1	6.21488
SAMEA117850818	L88	P17553-532	RangeWide	47.9	9.6	3.14571
SAMEA117850817	L85	P17553-531	RangeWide	48.8	13	5.76113
SAMEA117850816	L84	P17553-530	RangeWide	48.3	21.4	2.99171
SAMEA117850815	L82	P17553-529	RangeWide	48.8	20.8	2.70986
SAMEA117850814	L81	P17553-528	RangeWide	47.3	11.2	2.27063
SAMEA117850813	L79	P17553-527	RangeWide	47.6	25.6	2.63695
SAMEA117850812	L76	P17553-526	RangeWide	48.9	20.7	3.39565
SAMEA117850811	L75	P17553-525	RangeWide	63.2	16.8	2.80393
SAMEA117850810	L74	P17553-524	RangeWide	48.5	12	2.54583
SAMEA117850809	L61	P17553-523	RangeWide	49.3	20.5	3.15621
SAMEA117850808	L59	P17553-522	RangeWide	50.8	10.8	7.45301
SAMEA117850807	L54	P17553-521	RangeWide	48.2	9.2	7.74382
SAMEA117850806	L41	P17553-520	RangeWide	47.5	14.9	6.1169
SAMEA117850805	L36	P17553-519	RangeWide	56.1	27.5	2.51501
SAMEA117850804	L29	P17553-518	RangeWide	47.7	25.6	2.90847
SAMEA117850803	L25	P17553-517	RangeWide	48.1	11.9	2.91165
SAMEA117850802	L24	P17553-516	RangeWide	50.2	17.6	4.05932
SAMEA117850801	L22	P17553-515	RangeWide	54.8	36.3	3.12657
SAMEA117850800	L18	P17553-514	RangeWide	47.6	11.5	3.83624
SAMEA117850799	L16	P17553-513	RangeWide	47.5	13.9	3.57106
SAMEA117850798	L15	P17553-512	RangeWide	53.3	13.3	2.91408
SAMEA117850797	L14	P17553-511	RangeWide	53.8	23	2.97379
SAMEA117850796	L12	P17553-510	RangeWide	49.7	18.5	2.66693
SAMEA117850795	L11	P17553-509	RangeWide	48	8.9	6.92151
SAMEA117850794	L10	P17553-508	RangeWide	49.6	18.3	2.26239
SAMEA117850793	L9	P17553-507	RangeWide	49	14.8	3.24035
SAMEA117850792	L8	P17553-506	RangeWide	46.7	25.7	2.70452
SAMEA117850791	L7	P17553-505	RangeWide	48.7	13.8	2.84603
SAMEA117850790	L6	P17553-504	RangeWide	56.7	26.7	4.15534
SAMEA117850789	L3	P17553-503	RangeWide	58.7	12.2	3.13016
SAMEA117850788	L2	P17553-502	RangeWide	57.2	13.3	2.86136
SAMEA117850787	L1	P17553-501	RangeWide	47.8	8.2	3.02419
SAMEA117850786	L186	P17553-496	RangeWide	49.4	13.4	7.42064
SAMEA117850785	L210	P17553-495	RangeWide	42	23.5	2.97038
SAMEA117850784	L217	P17553-494	RangeWide	49.3	14.5	3.37647
SAMEA117850783	L204	P17553-493	RangeWide	47.5	15.2	3.35006
SAMEA117850782	L33	P17553-492	RangeWide	46.9	10.6	3.06114
SAMEA117850781	L93	P17553-488	RangeWide	49.1	13.2	2.9348
SAMEA117850780	L60	P17553-486	RangeWide	49.6	18.3	2.52924
SAMEA117850779	L5	P17553-485	RangeWide	48.1	8.8	2.95805
SAMEA117850778	L33038	P17553-481	RangeWide	50.4	12.9	2.3939
SAMEA117850777	L33037	P17553-480	RangeWide	48.3	8.9	6.48525
SAMEA117850776	L33036	P17553-479	RangeWide	47.4	14.9	7.89044
SAMEA117850775	L33034	P17553-477	RangeWide	55.3	24.7	3.21268
SAMEA117850774	L33033	P17553-476	RangeWide	49.3	20.2	3.27889
SAMEA117850773	L33032	P17553-475	RangeWide	60	10.7	3.07265
SAMEA117850772	L33031	P17553-474	RangeWide	47.4	13.9	2.90296
SAMEA117850771	L33026	P17553-469	RangeWide	46.7	13.5	3.08084
SAMEA117850770	L33025	P17553-468	RangeWide	54.1	11.9	2.96469
SAMEA117850769	L843	P17553-467	RangeWide	53.8	30.3	2.81879
SAMEA117850768	L885	P17553-466	RangeWide	49.7	15.4	3.33498
SAMEA117850767	L967	P17553-465	RangeWide	48.9	13.4	2.82457
SAMEA117850766	L798	P17553-464	RangeWide	59.5	14.1	3.59167
SAMEA117850765	L748	P17553-460	RangeWide	52.7	23.8	3.34986
SAMEA117850764	L720	P17553-459	RangeWide	47.5	11.3	6.03689
SAMEA117850763	L714	P17553-458	RangeWide	49.1	15.3	4.00649
SAMEA117850762	L933	P17553-456	RangeWide	56.8	14.2	3.32959
SAMEA117850761	L848	P17553-454	RangeWide	53.4	15.8	2.66523
SAMEA117850760	L717	P17553-452	RangeWide	47.7	16.4	2.78902
SAMEA117850759	L715	P17553-451	RangeWide	48.2	12.1	3.22246
SAMEA117850758	L741	P17553-448	RangeWide	53.3	22.9	2.74625
SAMEA117850757	L744	P17553-446	RangeWide	46.3	23	4.87161
SAMEA117850756	L872	P17553-445	RangeWide	47.7	8	2.58047
SAMEA117850755	L743	P17553-444	RangeWide	46.4	25.1	2.76009
SAMEA117850754	L780	P17553-443	RangeWide	49.1	13.3	3.02889
SAMEA117850753	L865	P17553-442	RangeWide	55.8	13.8	2.62948
SAMEA117850752	L911	P17553-441	RangeWide	49	11.8	2.35193
SAMEA117850751	L840	P17553-440	RangeWide	49.1	20.5	2.67977
SAMEA117850750	L770	P17553-439	RangeWide	49.1	13.2	2.64252
SAMEA117850749	L722	P17553-438	RangeWide	60.5	29.7	2.47569
SAMEA117850748	L1168	P17553-437	RangeWide	46.5	14.6	2.54712
SAMEA117850747	L862	P17553-435	RangeWide	46.3	6.5	2.43201
SAMEA117850746	L826	P17553-433	RangeWide	50.6	15.6	3.22769
SAMEA117850745	L791	P17553-432	RangeWide	49.4	12.9	2.87101
SAMEA117850744	L825	P17553-431	RangeWide	47.6	13	2.87873
SAMEA117850743	L961	P17553-430	RangeWide	46.3	23	2.28992
SAMEA117850742	L1351	P17553-429	RangeWide	48	11.4	2.38438
SAMEA117850741	L822	P17553-428	RangeWide	47.5	16	2.47107
SAMEA117850740	L724	P17553-425	RangeWide			2.2146
SAMEA117850739	L1097	P17553-424	RangeWide	49.6	16.1	2.41561
SAMEA117850738	L846	P17553-422	RangeWide	48.9	13.4	7.01898
SAMEA117850737	L3298	P17553-420	RangeWide	62.3	9.7	2.6614
SAMEA117850736	L718	P17553-419	RangeWide	54.54	13.63	2.54203
SAMEA117850735	L789	P17553-417	RangeWide	48.2	12.7	10.4088
SAMEA117850734	L749	P17553-416	RangeWide	63.5	19.3	2.50658
SAMEA117850733	L1338	P17553-415	RangeWide	47.4	14	2.0419
SAMEA117850732	L730	P17553-414	RangeWide	42.7	20.1	2.049
SAMEA117850731	L792	P17553-413	RangeWide	46.8	14	2.73455
SAMEA117850730	L757	P17553-412	RangeWide	51.3	20.6	2.48879
SAMEA117850729	L765	P17553-411	RangeWide	51.8	10.6	3.11271
SAMEA117850728	L801	P17553-409	RangeWide	54.3	18.4	6.32447
SAMEA117850727	L723	P17553-408	RangeWide	47.7	10.4	2.74828
SAMEA117850726	L949	P17553-407	RangeWide	49.4	14.3	2.12027
SAMEA117850725	L1053	P17553-405	RangeWide	49.5	9	2.15167
SAMEA117850724	L963	P17553-404	RangeWide	49.8	14	2.33876
SAMEA117850723	L750	P17553-402	RangeWide	48.9	20.6	2.79504
SAMEA117850722	L901	P17553-401	RangeWide	46.9	9.9	3.36826
SAMEA117850721	L33076	P17553-396	RangeWide	47.7	15.6	5.97361
SAMEA117850720	L2018	P17553-395	RangeWide	48.6	14.3	6.10191
SAMEA117850719	L1658	P17553-394	RangeWide	47.7	10.2	4.06856
SAMEA117850718	L33075	P17553-393	RangeWide	49.3	20.2	8.68442
SAMEA117850717	L2101	P17553-392	RangeWide	48.3	10.5	7.74179
SAMEA117850716	L33074	P17553-391	RangeWide	48.6	8.4	4.1075
SAMEA117850715	L33073	P17553-390	RangeWide	46.3	7.1	6.39365
SAMEA117850714	L33072	P17553-389	RangeWide	54.2	17	7.58202
SAMEA117850713	L1624	P17553-388	RangeWide	53.4	14.9	2.94497
SAMEA117850712	L2236	P17553-387	RangeWide	50.4	6.3	3.10304
SAMEA117850711	L33071	P17553-386	RangeWide	60.5	11	6.55659
SAMEA117850710	L2063	P17553-385	RangeWide	49.5	16.7	3.58469
SAMEA117850709	L2515	P17553-384	RangeWide	43.6	22.5	7.87546
SAMEA117850708	L2059	P17553-383	RangeWide	51.5	8.7	4.14314
SAMEA117850707	L2771	P17553-382	RangeWide	48.9	19.9	7.93451
SAMEA117850706	L2936	P17553-381	RangeWide	44.8	15	4.13054
SAMEA117850705	L2834	P17553-380	RangeWide	49.8	14.2	3.49919
SAMEA117850704	L33070	P17553-379	RangeWide	46.9	14.3	9.54717
SAMEA117850703	L2625	P17553-378	RangeWide	42.3	23.6	6.00334
SAMEA117850702	L33069	P17553-377	RangeWide	47.6	14.3	7.08779
SAMEA117850701	L2879	P17553-376	RangeWide	54.4	16.6	3.51376
SAMEA117850700	L33068	P17553-375	RangeWide	47.2	14.7	6.86487
SAMEA117850699	L2617	P17553-374	RangeWide	47.7	10.4	3.9169
SAMEA117850698	L33067	P17553-373	RangeWide	50.1	12.3	4.6428
SAMEA117850697	L2620	P17553-372	RangeWide	49.1	13.3	3.59896
SAMEA117850696	L33066	P17553-371	RangeWide	60	10.7	7.48453
SAMEA117850695	L2988	P17553-370	RangeWide	49.5	10.5	3.49317
SAMEA117850694	L2897	P17553-369	RangeWide	48.1	10.9	4.03945
SAMEA117850693	L2773	P17553-368	RangeWide	48.2	6.9	6.97335
SAMEA117850692	L2833	P17553-367	RangeWide	47.6	12.1	3.38068
SAMEA117850691	L2883	P17553-366	RangeWide	53.3	23.3	7.23129
SAMEA117850690	L33065	P17553-365	RangeWide	47.5	10.7	9.57153
SAMEA117850689	L2672	P17553-364	RangeWide	48.7	14.7	3.50926
SAMEA117850688	L3246	P17553-363	RangeWide	48.3	9.5	2.92255
SAMEA117850687	L33064	P17553-362	RangeWide	46.5	14.6	2.96157
SAMEA117850686	L2900	P17553-361	RangeWide	48	9.2	2.59197
SAMEA117850685	L2972	P17553-360	RangeWide	47.7	11.8	2.93891
SAMEA117850684	L2933	P17553-359	RangeWide	49.7	16.3	7.36274
SAMEA117850683	L33063	P17553-358	RangeWide	47.3	25	3.40295
SAMEA117850682	L2882	P17553-357	RangeWide	54.2	22	3.60814
SAMEA117850681	L2861	P17553-356	RangeWide	55.1	30.2	3.47445
SAMEA117850680	L2831	P17553-355	RangeWide	48.1	11.6	3.19727
SAMEA117850679	L2830	P17553-354	RangeWide	59.1	16.4	3.15966
SAMEA117850678	L2703	P17553-353	RangeWide	49.8	17.5	2.92644
SAMEA117850677	L2938	P17553-352	RangeWide	56.8	10	2.93209
SAMEA117850676	L2859	P17553-351	RangeWide	48.9	20.2	3.26502
SAMEA117850675	L2971	P17553-350	RangeWide	47.8	9.6	1.87001
SAMEA117850674	L2873	P17553-349	RangeWide	49.8	14.2	3.75626
SAMEA117850673	L2905	P17553-348	RangeWide	47.8	25.8	2.72907
SAMEA117850672	L2860	P17553-347	RangeWide	49	18.9	4.38679
SAMEA117850671	L3078	P17553-346	RangeWide	49.1	13.2	2.7493
SAMEA117850670	L3212	P17553-345	RangeWide	48.8	8.3	2.27452
SAMEA117850669	L2962	P17553-344	RangeWide	57.6	14.2	1.99035
SAMEA117850668	L2815	P17553-343	RangeWide	47	14.4	2.96493
SAMEA117850667	L2986	P17553-342	RangeWide	47.2	13.8	2.8047
SAMEA117850666	L2848	P17553-341	RangeWide	62.3	14.1	2.30158
SAMEA117850665	L2820	P17553-340	RangeWide	49.7	8.6	3.45902
SAMEA117850664	L3060	P17553-339	RangeWide	56.3	14.8	3.1736
SAMEA117850663	L2803	P17553-338	RangeWide	53.8	11.3	2.37215
SAMEA117850662	L2876	P17553-337	RangeWide	48.1	10.6	3.418
SAMEA117850661	L3187	P17553-336	RangeWide	47.7	11.8	2.22476
SAMEA117850660	L2670	P17553-335	RangeWide	48.1	10.6	3.30167
SAMEA117850659	H340	P17553-334	BreedingPopulation	64.1	16.58	3.46291
SAMEA117850658	H80	P17553-333	BreedingPopulation	63.2	17.15	3.29499
SAMEA117850657	H155	P17553-332	BreedingPopulation	62.43	16.85	3.89864
SAMEA117850656	H47	P17553-331	BreedingPopulation	64.3	17.4	3.76052
SAMEA117850655	H192	P17553-330	BreedingPopulation	62.63	15.05	3.3114
SAMEA117850654	H165	P17553-329	BreedingPopulation	63.25	17.65	3.58047
SAMEA117850653	H503	P17553-328	BreedingPopulation	62.43	16.85	3.59757
SAMEA117850652	H75	P17553-327	BreedingPopulation	63.48	17.67	3.04872
SAMEA117850651	H172	P17553-326	BreedingPopulation	65.1	20.55	3.4146
SAMEA117850650	H134	P17553-325	BreedingPopulation	62.63	15.05	3.43236
SAMEA117850649	H151	P17553-324	BreedingPopulation	61.62	16.48	2.93901
SAMEA117850648	H111	P17553-323	BreedingPopulation	66.68	22.65	3.48389
SAMEA117850647	H156	P17553-322	BreedingPopulation	62.43	17.17	3.64605
SAMEA117850646	H1030	P17553-321	BreedingPopulation	62.45	15.85	3.81341
SAMEA117850645	H128	P17553-320	BreedingPopulation	63.57	17.72	2.9671
SAMEA117850644	H143	P17553-319	BreedingPopulation	64.58	15.87	2.93864
SAMEA117850643	H184	P17553-318	BreedingPopulation	61	13.3	2.83856
SAMEA117850642	H955	P17553-317	BreedingPopulation	63.78	18.1	3.1542
SAMEA117850641	H166	P17553-316	BreedingPopulation	63.25	17.65	3.85704
SAMEA117850640	H130	P17553-315	BreedingPopulation	61.95	16.38	4.01369
SAMEA117850639	H224	P17553-314	BreedingPopulation	63.88	18.27	3.4639
SAMEA117850638	H167	P17553-313	BreedingPopulation	65.4	20.93	3.54712
SAMEA117850637	H91	P17553-312	BreedingPopulation	61.95	16.28	3.02067
SAMEA117850636	H191	P17553-311	BreedingPopulation	63.63	14.43	3.41407
SAMEA117850635	H182	P17553-310	BreedingPopulation	61.6	16.52	2.97923
SAMEA117850634	H164	P17553-309	BreedingPopulation	62.05	15.48	2.9711
SAMEA117850633	H163	P17553-308	BreedingPopulation	64.22	20.12	3.9407
SAMEA117850632	H145	P17553-307	BreedingPopulation	64.15	18.67	3.15553
SAMEA117850631	H171	P17553-306	BreedingPopulation	63.37	14.23	3.29117
SAMEA117850630	H160	P17553-305	BreedingPopulation	63.28	15.98	2.92652
SAMEA117850629	H146	P17553-304	BreedingPopulation	63.58	18.12	4.22727
SAMEA117850628	H104	P17553-303	BreedingPopulation	61.62	16.48	3.19435
SAMEA117850627	H208	P17553-302	BreedingPopulation	61.95	16.38	3.17258
SAMEA117850626	H159	P17553-301	BreedingPopulation	64.57	19.17	3.26905
SAMEA117850625	H1250	P17553-296	BreedingPopulation	61.78	16.1	3.01887
SAMEA117850624	H954	P17553-295	BreedingPopulation	61.62	16.48	2.77856
SAMEA117850623	H876	P17553-294	BreedingPopulation	64.15	18.67	2.58892
SAMEA117850622	H853	P17553-293	BreedingPopulation	63.63	14.43	2.88211
SAMEA117850621	H851	P17553-292	BreedingPopulation	63.75	16.6	2.78767
SAMEA117850620	H847	P17553-291	BreedingPopulation	63.58	18.12	3.15085
SAMEA117850619	H842	P17553-290	BreedingPopulation	62.63	15.05	2.48423
SAMEA117850618	H841	P17553-289	BreedingPopulation	62.38	15.4	2.53042
SAMEA117850617	H839	P17553-288	BreedingPopulation	66.73	21.63	4.26937
SAMEA117850616	H838	P17553-287	BreedingPopulation	62.88	16.58	3.2876
SAMEA117850615	H834	P17553-286	BreedingPopulation	63.37	14.25	2.85077
SAMEA117850614	H816	P17553-285	BreedingPopulation	64.28	17.4	2.69072
SAMEA117850613	H740	P17553-284	BreedingPopulation	63.82	17.78	4.16917
SAMEA117850612	H735	P17553-283	BreedingPopulation	64.22	20.12	4.20997
SAMEA117850611	H720	P17553-282	BreedingPopulation	63.8	14.83	2.70623
SAMEA117850610	H719	P17553-281	BreedingPopulation	61.6	16.52	2.32976
SAMEA117850609	H717	P17553-280	BreedingPopulation	63.47	15.5	2.46258
SAMEA117850608	H713	P17553-279	BreedingPopulation	63.63	15.08	4.49259
SAMEA117850607	H701	P17553-278	BreedingPopulation	64.33	20.33	3.71289
SAMEA117850606	H223	P17553-277	BreedingPopulation	64.45	16.98	3.58808
SAMEA117850605	H219	P17553-276	BreedingPopulation	63.81	16.4	3.33686
SAMEA117850604	H204	P17553-275	BreedingPopulation	66.73	21.63	5.15539
SAMEA117850603	H194	P17553-274	BreedingPopulation	62.05	15.48	2.77783
SAMEA117850602	H193	P17553-273	BreedingPopulation	63.73	18.77	2.63236
SAMEA117850601	H189	P17553-272	BreedingPopulation	63.82	17.78	2.51928
SAMEA117850600	H188	P17553-271	BreedingPopulation	62.43	16.85	2.70892
SAMEA117850599	H187	P17553-270	BreedingPopulation	64.28	17.4	3.03361
SAMEA117850598	H186	P17553-269	BreedingPopulation	63.7	18.37	2.74135
SAMEA117850597	H185	P17553-268	BreedingPopulation	61.95	16.28	4.42016
SAMEA117850596	H183	P17553-267	BreedingPopulation	62.63	15.05	4.61737
SAMEA117850595	H181	P17553-266	BreedingPopulation	63.92	18.03	2.93016
SAMEA117850594	H178	P17553-265	BreedingPopulation	62.63	15.05	2.43141
SAMEA117850593	H177	P17553-264	BreedingPopulation	63.47	15.5	2.68718
SAMEA117850592	H173	P17553-263	BreedingPopulation	63.58	18.12	2.72746
SAMEA117850591	H169	P17553-262	BreedingPopulation	62.05	15.48	2.93187
SAMEA117850590	H168	P17553-261	BreedingPopulation	62.47	16.75	3.08838
SAMEA117850589	H161	P17553-260	BreedingPopulation	63.83	17.77	2.50732
SAMEA117850588	H158	P17553-259	BreedingPopulation	62.92	17.5	2.63384
SAMEA117850587	H157	P17553-258	BreedingPopulation	63.5	13.82	2.48985
SAMEA117850586	H154	P17553-257	BreedingPopulation	63.15	14.55	2.43466
SAMEA117850585	H148	P17553-256	BreedingPopulation	63.53	17.5	2.32082
SAMEA117850584	H147	P17553-255	BreedingPopulation	66.02	22.63	2.37379
SAMEA117850583	H142	P17553-254	BreedingPopulation	62.63	15.05	3.131
SAMEA117850582	H141	P17553-253	BreedingPopulation	63.57	17.72	2.33225
SAMEA117850581	H138	P17553-252	BreedingPopulation	62.43	17.17	3.77184
SAMEA117850580	H133	P17553-251	BreedingPopulation	64.57	19.17	2.6805
SAMEA117850579	H131	P17553-250	BreedingPopulation	63.83	17.77	2.51465
SAMEA117850578	H126	P17553-249	BreedingPopulation	66.73	21.63	2.76787
SAMEA117850577	H125	P17553-248	BreedingPopulation	66.82	23.42	4.89081
SAMEA117850576	H124	P17553-247	BreedingPopulation	63.07	15.53	2.73168
SAMEA117850575	H118	P17553-246	BreedingPopulation	64.22	20.12	2.6916
SAMEA117850574	H116	P17553-245	BreedingPopulation	64.33	16.97	2.46463
SAMEA117850573	H113	P17553-244	BreedingPopulation	63.07	15.53	2.48476
SAMEA117850572	H109	P17553-243	BreedingPopulation	63.75	16.6	2.46953
SAMEA117850571	H106	P17553-242	BreedingPopulation	64.95	18.58	2.63317
SAMEA117850570	H103	P17553-241	BreedingPopulation	63.53	17.5	2.5918
SAMEA117850569	H102	P17553-240	BreedingPopulation	61.6	16.52	2.49631
SAMEA117850568	H100	P17553-239	BreedingPopulation	61.78	16.1	3.0523
SAMEA117850567	H99	P17553-238	BreedingPopulation	62.47	16.75	2.78399
SAMEA117850566	H97	P17553-237	BreedingPopulation	61.95	16.38	2.57988
SAMEA117850565	H96	P17553-236	BreedingPopulation	61.62	16.48	2.79064
SAMEA117850564	H95	P17553-235	BreedingPopulation	63.57	17.72	2.60726
SAMEA117850563	H90	P17553-234	BreedingPopulation	63.42	18.62	2.5856
SAMEA117850562	H89	P17553-233	BreedingPopulation	64.27	17.05	2.40491
SAMEA117850561	H88	P17553-232	BreedingPopulation	63.78	18.1	2.71257
SAMEA117850560	H86	P17553-231	BreedingPopulation	62.9	17.48	2.84283
SAMEA117850559	H84	P17553-230	BreedingPopulation	63.42	18.62	2.55947
SAMEA117850558	H83	P17553-229	BreedingPopulation	66.38	20.75	3.63063
SAMEA117850557	H78	P17553-228	BreedingPopulation	61.95	16.38	2.76091
SAMEA117850556	H74	P17553-227	BreedingPopulation	63.82	17.78	2.62644
SAMEA117850555	H70	P17553-226	BreedingPopulation	67.55	22.5	2.50445
SAMEA117850554	H68	P17553-225	BreedingPopulation	65.07	17.08	2.47426
SAMEA117850553	H66	P17553-224	BreedingPopulation	66.73	21.63	2.4936
SAMEA117850552	H62	P17553-223	BreedingPopulation	63.08	15.32	2.54114
SAMEA117850551	H58	P17553-222	BreedingPopulation	64.18	19.85	2.5246
SAMEA117850550	H54	P17553-221	BreedingPopulation	64.3	17.4	2.43897
SAMEA117850549	H53	P17553-220	BreedingPopulation	64.15	18.67	3.04028
SAMEA117850548	H52	P17553-219	BreedingPopulation	65.4	20.93	2.67418
SAMEA117850547	H49	P17553-218	BreedingPopulation	63.28	15.98	2.42371
SAMEA117850546	H43	P17553-217	BreedingPopulation	63.15	14.55	3.01641
SAMEA117850545	H36	P17553-216	BreedingPopulation	64.22	20.12	2.36855
SAMEA117850544	H35	P17553-215	BreedingPopulation	63.7	18.37	2.47749
SAMEA117850543	H34	P17553-214	BreedingPopulation	62.9	17.48	2.58692
SAMEA117850542	H33	P17553-213	BreedingPopulation	62.92	17.67	2.43992
SAMEA117850541	H30	P17553-212	BreedingPopulation	63.25	17.65	2.41889
SAMEA117850540	H29	P17553-211	BreedingPopulation	63.82	17.57	2.51114
SAMEA117850539	H26	P17553-210	BreedingPopulation	64.1	16.58	2.31486
SAMEA117850538	H20	P17553-209	BreedingPopulation	63.7	16.92	2.47321
SAMEA117850537	H18	P17553-208	BreedingPopulation	63.37	14.25	2.46344
SAMEA117850536	H17	P17553-207	BreedingPopulation	63.82	17.78	2.52693
SAMEA117850535	H14	P17553-206	BreedingPopulation	62.92	17.5	2.46538
SAMEA117850534	H9	P17553-205	BreedingPopulation	64.18	19.83	2.63676
SAMEA117850533	H5	P17553-204	BreedingPopulation	61.62	16.48	2.44456
SAMEA117850532	H4	P17553-203	BreedingPopulation	63.7	18.37	2.40538
SAMEA117850531	H3	P17553-202	BreedingPopulation	63.83	17.55	2.7193
SAMEA117850530	H1	P17553-201	BreedingPopulation	63.53	17.68	2.43626
SAMEA117850529	H427	P17553-196	BreedingPopulation	61.78	16.1	3.01281
SAMEA117850528	H527	P17553-195	BreedingPopulation	66.73	21.63	2.45904
SAMEA117850527	H537	P17553-194	BreedingPopulation	64.3	17.4	2.58835
SAMEA117850526	H516	P17553-193	BreedingPopulation	62.63	15.05	2.42574
SAMEA117850525	H545	P17553-192	BreedingPopulation	64.58	15.87	2.93194
SAMEA117850524	H1235	P17553-191	BreedingPopulation	63.58	18.12	3.74106
SAMEA117850523	H1236	P17553-190	BreedingPopulation	63.5	13.82	2.32114
SAMEA117850522	H492	P17553-189	BreedingPopulation	64.18	19.83	2.50985
SAMEA117850521	H256	P17553-188	BreedingPopulation	64.33	16.97	2.89303
SAMEA117850520	H582	P17553-187	BreedingPopulation	66.38	20.75	2.4559
SAMEA117850519	H648	P17553-186	BreedingPopulation	66.82	23.42	2.60428
SAMEA117850518	H1240	P17553-185	BreedingPopulation	62.92	17.83	2.4771
SAMEA117850517	H521	P17553-184	BreedingPopulation	62.92	17.33	2.50788
SAMEA117850516	H350	P17553-183	BreedingPopulation	63.82	17.62	2.67914
SAMEA117850515	H623	P17553-182	BreedingPopulation	63.7	16.92	2.55286
SAMEA117850514	H472	P17553-181	BreedingPopulation	63.25	17.65	3.45371
SAMEA117850513	H536	P17553-180	BreedingPopulation	63.53	17.68	2.5035
SAMEA117850512	H1243	P17553-179	BreedingPopulation	63.28	15.98	3.89745
SAMEA117850511	H1249	P17553-178	BreedingPopulation	63.25	17.65	4.35687
SAMEA117850510	H1234	P17553-177	BreedingPopulation	64.45	18.17	2.68143
SAMEA117850509	H443	P17553-176	BreedingPopulation	62.92	17.5	2.85295
SAMEA117850508	H261	P17553-175	BreedingPopulation	63.15	14.55	2.25782
SAMEA117850507	H419	P17553-174	BreedingPopulation	63.53	17.5	2.81906
SAMEA117850506	H1231	P17553-173	BreedingPopulation	63.82	17.78	2.75218
SAMEA117850505	H560	P17553-172	BreedingPopulation	61.95	16.28	2.74918
SAMEA117850504	H1241	P17553-171	BreedingPopulation	63.7	16.92	2.72383
SAMEA117850503	H390	P17553-170	BreedingPopulation	62.43	17.17	2.50794
SAMEA117850502	H384	P17553-169	BreedingPopulation	64.18	20.05	2.34088
SAMEA117850501	H388	P17553-168	BreedingPopulation	64.57	19.17	2.44887
SAMEA117850500	H414	P17553-167	BreedingPopulation	63.7	18.37	2.48419
SAMEA117850499	H766	P17553-166	BreedingPopulation	66.38	20.75	3.68266
SAMEA117850498	H312	P17553-165	BreedingPopulation	62.92	17.83	2.528
SAMEA117850497	H827	P17553-164	BreedingPopulation	64.18	20.05	2.44118
SAMEA117850496	H733	P17553-163	BreedingPopulation	62.43	16.85	3.56191
SAMEA117850495	H298	P17553-162	BreedingPopulation	63.28	15.98	3.53948
SAMEA117850494	H409	P17553-161	BreedingPopulation	63.82	17.62	3.48691
SAMEA117850493	H476	P17553-160	BreedingPopulation	62.9	17.48	2.49556
SAMEA117850492	H354	P17553-159	BreedingPopulation	63.57	17.72	2.3886
SAMEA117850491	H694	P17553-158	BreedingPopulation	63.25	17.65	2.70642
SAMEA117850490	H1233	P17553-157	BreedingPopulation	63.15	14.55	2.4595
SAMEA117850489	H794	P17553-156	BreedingPopulation	66.82	23.42	2.52562
SAMEA117850488	H262	P17553-155	BreedingPopulation	63.37	14.23	2.58405
SAMEA117850487	H1253	P17553-154	BreedingPopulation	63.53	17.68	2.47723
SAMEA117850486	H732	P17553-153	BreedingPopulation	64.2	17.58	2.70695
SAMEA117850485	H279	P17553-152	BreedingPopulation	63.47	15.5	2.51717
SAMEA117850484	H406	P17553-151	BreedingPopulation	64.58	15.87	2.64515
SAMEA117850483	H397	P17553-150	BreedingPopulation	62.88	16.58	3.43717
SAMEA117850482	H285	P17553-149	BreedingPopulation	63.53	17.5	2.74065
SAMEA117850481	H376	P17553-148	BreedingPopulation	63.7	18.37	2.50548
SAMEA117850480	H379	P17553-147	BreedingPopulation	64.28	17.4	2.83161
SAMEA117850479	H240	P17553-146	BreedingPopulation	63.7	18.37	2.65366
SAMEA117850478	H321	P17553-145	BreedingPopulation	62.63	15.05	2.63051
SAMEA117850477	H398	P17553-144	BreedingPopulation	63.53	17.5	2.61977
SAMEA117850476	H260	P17553-143	BreedingPopulation	63.28	15.98	2.69451
SAMEA117850475	H323	P17553-142	BreedingPopulation	63.57	17.72	2.28799
SAMEA117850474	H353	P17553-141	BreedingPopulation	64.18	19.85	2.30586
SAMEA117850473	H282	P17553-140	BreedingPopulation	64.18	19.58	2.84912
SAMEA117850472	H287	P17553-139	BreedingPopulation	62.47	16.75	3.51987
SAMEA117850471	H267	P17553-138	BreedingPopulation	64.22	20.12	2.9528
SAMEA117850470	H826	P17553-137	BreedingPopulation	64.22	20.12	2.77485
SAMEA117850469	H288	P17553-136	BreedingPopulation	63.25	17.65	3.52166
SAMEA117850468	H341	P17553-135	BreedingPopulation	63.83	17.77	2.547
SAMEA117850467	H380	P17553-134	BreedingPopulation	62.63	15.05	2.36913
SAMEA117850466	H317	P17553-133	BreedingPopulation	63.37	14.25	2.80222
SAMEA117850465	H370	P17553-132	BreedingPopulation	63.5	13.82	3.37856
SAMEA117850464	H318	P17553-131	BreedingPopulation	65.4	20.93	2.71831
SAMEA117850463	H316	P17553-130	BreedingPopulation	64.73	21.03	2.51768
SAMEA117850462	H249	P17553-129	BreedingPopulation	62.9	17.48	2.31448
SAMEA117850461	H403	P17553-128	BreedingPopulation	62.63	15.05	2.67092
SAMEA117850460	H226	P17553-127	BreedingPopulation	63.72	16.1	2.65317
SAMEA117850459	H416	P17553-126	BreedingPopulation	63.81	16.4	2.43884
SAMEA117850458	H280	P17553-125	BreedingPopulation	64.18	19.58	2.62981
SAMEA117850457	H352	P17553-124	BreedingPopulation	62.88	16.58	3.67551
SAMEA117850456	H405	P17553-123	BreedingPopulation	63.15	14.55	2.65996
SAMEA117850455	H652	P17553-122	BreedingPopulation	63.83	17.77	3.00156
SAMEA117850454	H290	P17553-121	BreedingPopulation	66.02	22.63	2.39799
SAMEA117850453	H415	P17553-120	BreedingPopulation	62.05	15.48	2.52557
SAMEA117850452	H389	P17553-119	BreedingPopulation	64.48	14.08	2.58983
SAMEA117850451	H789	P17553-118	BreedingPopulation	62.9	17.48	2.63544
SAMEA117850450	H253	P17553-117	BreedingPopulation	62.87	15	2.53277
SAMEA117850449	H385	P17553-116	BreedingPopulation	63.58	18.12	2.7244
SAMEA117850448	H270	P17553-115	BreedingPopulation	63.28	15.98	2.30865
SAMEA117850447	H314	P17553-114	BreedingPopulation	61.62	16.48	2.81463
SAMEA117850446	H369	P17553-113	BreedingPopulation	64.22	20.12	2.61271
SAMEA117850445	H231	P17553-112	BreedingPopulation	66.02	22.63	2.51786
SAMEA117850444	H387	P17553-111	BreedingPopulation	64.15	18.67	2.484
SAMEA117850443	H377	P17553-110	BreedingPopulation	62.63	15.05	3.54299
SAMEA117850442	H663	P17553-109	BreedingPopulation	63.63	15.08	3.59363
SAMEA117850441	H325	P17553-108	BreedingPopulation	64.28	14.93	2.4279
SAMEA117850440	H319	P17553-107	BreedingPopulation	63.28	15.98	2.54639
SAMEA117850439	H692	P17553-106	BreedingPopulation	62.05	15.48	2.44571
SAMEA117850438	H269	P17553-105	BreedingPopulation	63.78	18.1	2.79922
SAMEA117850437	H291	P17553-104	BreedingPopulation	66.82	23.42	2.68042
SAMEA117850436	H255	P17553-103	BreedingPopulation	63.85	14.33	2.74098
SAMEA117850435	H363	P17553-102	BreedingPopulation	62.82	15.02	2.73969
SAMEA117850434	H401	P17553-101	BreedingPopulation	61.78	16.1	2.48245
SAMEA117850433	H1058	P15766-296	BreedingPopulation	63.03	15.58	4.0258
SAMEA117850432	H1019	P15766-295	BreedingPopulation	62.63	15.05	4.67896
SAMEA117850431	H1017	P15766-294	BreedingPopulation	63.15	14.55	4.99821
SAMEA117850430	H644	P15766-293	BreedingPopulation	64.67	16.6	4.9585
SAMEA117850429	H640	P15766-292	BreedingPopulation	64.48	14.08	4.75298
SAMEA117850428	H628	P15766-291	BreedingPopulation	63.53	17.5	4.76485
SAMEA117850427	H627	P15766-290	BreedingPopulation	64.52	20.8	4.61733
SAMEA117850426	H609	P15766-289	BreedingPopulation	63.48	17.67	4.69434
SAMEA117850425	H608	P15766-288	BreedingPopulation	63.37	14.25	4.75946
SAMEA117850424	H607	P15766-287	BreedingPopulation	64.18	19.85	5.00033
SAMEA117850423	H558	P15766-286	BreedingPopulation	64.33	20.33	4.73207
SAMEA117850422	H557	P15766-285	BreedingPopulation	64.18	19.58	4.49405
SAMEA117850421	H548	P15766-284	BreedingPopulation	64.18	19.85	4.98257
SAMEA117850420	H544	P15766-283	BreedingPopulation	63.47	15.5	5.15982
SAMEA117850419	H532	P15766-282	BreedingPopulation	66.68	22.65	4.62243
SAMEA117850418	H531	P15766-281	BreedingPopulation	64.52	20.8	4.68964
SAMEA117850417	H522	P15766-280	BreedingPopulation	63.82	17.62	4.80368
SAMEA117850416	H518	P15766-279	BreedingPopulation	64.3	17.4	4.76953
SAMEA117850415	H513	P15766-278	BreedingPopulation	65.4	20.93	4.58605
SAMEA117850414	H511	P15766-277	BreedingPopulation	61.62	16.48	4.49744
SAMEA117850413	H506	P15766-276	BreedingPopulation	63.42	18.62	4.88266
SAMEA117850412	H505	P15766-275	BreedingPopulation	63.47	15.5	4.66289
SAMEA117850411	H498	P15766-274	BreedingPopulation	63.58	18.12	4.67747
SAMEA117850410	H491	P15766-273	BreedingPopulation	64.58	15.87	4.67959
SAMEA117850409	H283	P15766-272	BreedingPopulation	62.63	15.05	4.86262
SAMEA117850408	H242	P15766-271	BreedingPopulation	64.18	19.83	4.77499
SAMEA117850407	H222	P15766-270	BreedingPopulation	64.58	18.45	4.57535
SAMEA117850406	H220	P15766-269	BreedingPopulation	62.92	17.67	4.98915
SAMEA117850405	H218	P15766-268	BreedingPopulation	61.6	16.52	4.74117
SAMEA117850404	H214	P15766-267	BreedingPopulation	63.47	15.5	4.54246
SAMEA117850403	H213	P15766-266	BreedingPopulation	61.95	16.28	4.50812
SAMEA117850402	H212	P15766-265	BreedingPopulation	64	17.65	4.85175
SAMEA117850401	H211	P15766-264	BreedingPopulation	62.47	16.75	4.7349
SAMEA117850400	H210	P15766-263	BreedingPopulation	63.08	15.32	4.8343
SAMEA117850399	H205	P15766-262	BreedingPopulation	63.15	14.55	5.06736
SAMEA117850398	H201	P15766-261	BreedingPopulation	66.38	20.75	5.48369
SAMEA117850397	H200	P15766-260	BreedingPopulation	62.88	16.58	4.703
SAMEA117850396	H199	P15766-259	BreedingPopulation	63.28	15.98	4.70988
SAMEA117850395	H195	P15766-258	BreedingPopulation	64.45	19.6	4.67825
SAMEA117850394	H179	P15766-257	BreedingPopulation	63.7	18.37	4.6317
SAMEA117850393	H176	P15766-256	BreedingPopulation	63.5	13.82	5.18936
SAMEA117850392	H175	P15766-255	BreedingPopulation	61.95	16.38	4.67316
SAMEA117850391	H174	P15766-254	BreedingPopulation	63.47	15.5	4.88842
SAMEA117850390	H153	P15766-253	BreedingPopulation	63.78	18.1	4.82466
SAMEA117850389	H152	P15766-252	BreedingPopulation	64.18	19.83	4.81343
SAMEA117850388	H150	P15766-251	BreedingPopulation	63.58	18.12	4.73693
SAMEA117850387	H149	P15766-250	BreedingPopulation	63.42	18.62	4.77807
SAMEA117850386	H144	P15766-249	BreedingPopulation	63.07	15.53	4.76167
SAMEA117850385	H139	P15766-248	BreedingPopulation	64.18	19.58	5.39175
SAMEA117850384	H137	P15766-247	BreedingPopulation	64.22	20.12	5.36995
SAMEA117850383	H136	P15766-246	BreedingPopulation	66.38	20.75	5.44343
SAMEA117850382	H132	P15766-245	BreedingPopulation	64.18	20.05	5.25174
SAMEA117850381	H127	P15766-244	BreedingPopulation	65.4	20.93	5.03417
SAMEA117850380	H123	P15766-243	BreedingPopulation	64.73	21.03	5.0966
SAMEA117850379	H122	P15766-242	BreedingPopulation	61.95	16.28	5.06221
SAMEA117850378	H119	P15766-241	BreedingPopulation	63.8	14.83	5.22918
SAMEA117850377	H117	P15766-240	BreedingPopulation	63.78	18.1	5.06969
SAMEA117850376	H115	P15766-239	BreedingPopulation	64.18	17.57	4.28168
SAMEA117850375	H114	P15766-238	BreedingPopulation	65.07	17.07	5.4703
SAMEA117850374	H112	P15766-237	BreedingPopulation	62.92	17.67	5.42084
SAMEA117850373	H110	P15766-236	BreedingPopulation	63.83	17.55	5.10049
SAMEA117850372	H108	P15766-235	BreedingPopulation	63.82	17.78	5.31186
SAMEA117850371	H107	P15766-234	BreedingPopulation	62.92	17.5	4.91178
SAMEA117850370	H105	P15766-233	BreedingPopulation	63.63	14.43	5.17914
SAMEA117850369	H101	P15766-232	BreedingPopulation	63.7	16.92	5.14685
SAMEA117850368	H98	P15766-231	BreedingPopulation	63.58	18.12	4.92902
SAMEA117850367	H94	P15766-230	BreedingPopulation	63.75	16.6	5.14331
SAMEA117850366	H93	P15766-229	BreedingPopulation	62.43	17.17	5.00181
SAMEA117850365	H87	P15766-228	BreedingPopulation	64.33	20.33	4.85011
SAMEA117850364	H85	P15766-227	BreedingPopulation	62.63	15.05	4.9621
SAMEA117850363	H82	P15766-226	BreedingPopulation	64.58	15.87	5.17436
SAMEA117850362	H81	P15766-225	BreedingPopulation	64.18	19.83	5.16178
SAMEA117850361	H79	P15766-224	BreedingPopulation	66.82	23.42	4.92317
SAMEA117850360	H77	P15766-223	BreedingPopulation	63.2	17.15	5.31734
SAMEA117850359	H76	P15766-222	BreedingPopulation	66.38	20.75	5.06481
SAMEA117850358	H73	P15766-221	BreedingPopulation	61.78	16.1	5.13985
SAMEA117850357	H72	P15766-220	BreedingPopulation	64.28	14.93	5.04801
SAMEA117850356	H71	P15766-219	BreedingPopulation	63.48	17.67	4.96357
SAMEA117850355	H69	P15766-218	BreedingPopulation	63.5	13.82	5.51958
SAMEA117850354	H67	P15766-217	BreedingPopulation	63.8	14.83	5.03223
SAMEA117850353	H63	P15766-216	BreedingPopulation	64.18	19.83	5.24874
SAMEA117850352	H56	P15766-215	BreedingPopulation	63.53	17.5	5.14735
SAMEA117850351	H55	P15766-214	BreedingPopulation	64.22	20.12	5.18102
SAMEA117850350	H51	P15766-213	BreedingPopulation	66.82	23.42	5.28873
SAMEA117850349	H50	P15766-212	BreedingPopulation	63.42	18.62	5.15646
SAMEA117850348	H46	P15766-211	BreedingPopulation	65.2	16.67	5.02453
SAMEA117850347	H45	P15766-210	BreedingPopulation	63.7	18.37	5.09913
SAMEA117850346	H32	P15766-209	BreedingPopulation	64.22	20.12	5.10395
SAMEA117850345	H31	P15766-208	BreedingPopulation	63.03	15.58	5.23898
SAMEA117850344	H25	P15766-207	BreedingPopulation	61.95	16.38	5.04755
SAMEA117850343	H23	P15766-206	BreedingPopulation	65.1	20.55	5.19238
SAMEA117850342	H21	P15766-205	BreedingPopulation	63.08	15.32	4.99135
SAMEA117850341	H12	P15766-204	BreedingPopulation	63.78	18.1	5.172
SAMEA117850340	H11	P15766-203	BreedingPopulation	64.22	20.12	5.19228
SAMEA117850339	H10	P15766-202	BreedingPopulation	61.95	16.38	5.04848
SAMEA117850338	H8	P15766-201	BreedingPopulation	63.42	18.62	6.0628
SAMEA117850337	H1254	P15766-196	BreedingPopulation	63.28	15.98	3.66312
SAMEA117850336	H1252	P15766-195	BreedingPopulation	64.18	19.85	4.15516
SAMEA117850335	H1248	P15766-194	BreedingPopulation	65.4	20.93	4.25789
SAMEA117850334	H1246	P15766-193	BreedingPopulation	64.18	19.58	4.78168
SAMEA117850333	H1245	P15766-192	BreedingPopulation	66.82	23.42	4.28536
SAMEA117850332	H1244	P15766-191	BreedingPopulation	62.43	16.85	4.28646
SAMEA117850331	H1242	P15766-190	BreedingPopulation	64.18	20.05	4.21496
SAMEA117850330	H1239	P15766-189	BreedingPopulation	62.63	15.05	4.4406
SAMEA117850329	H1238	P15766-188	BreedingPopulation	64.18	19.58	4.2345
SAMEA117850328	H1237	P15766-187	BreedingPopulation	63.25	17.65	4.44138
SAMEA117850327	H1232	P15766-186	BreedingPopulation	64.48	14.08	4.28427
SAMEA117850326	H829	P15766-185	BreedingPopulation	63.3	15.98	5.32365
SAMEA117850325	H779	P15766-184	BreedingPopulation	62.43	17.17	4.59652
SAMEA117850324	H724	P15766-183	BreedingPopulation	64.18	20.05	4.51545
SAMEA117850323	H651	P15766-182	BreedingPopulation	62.9	17.48	4.41886
SAMEA117850322	H650	P15766-181	BreedingPopulation	64.57	19.17	4.50835
SAMEA117850321	H645	P15766-180	BreedingPopulation	63.2	17.15	4.25352
SAMEA117850320	H642	P15766-179	BreedingPopulation	66.73	21.63	4.08446
SAMEA117850319	H641	P15766-178	BreedingPopulation	64.28	17.4	4.41423
SAMEA117850318	H639	P15766-177	BreedingPopulation	63.03	15.58	4.00107
SAMEA117850317	H637	P15766-176	BreedingPopulation	63.8	14.83	4.16509
SAMEA117850316	H636	P15766-175	BreedingPopulation	63.08	15.32	4.74932
SAMEA117850315	H635	P15766-174	BreedingPopulation	63.53	17.5	4.44407
SAMEA117850314	H634	P15766-173	BreedingPopulation	63.15	14.55	4.41878
SAMEA117850313	H625	P15766-172	BreedingPopulation	64.18	19.85	4.39516
SAMEA117850312	H624	P15766-171	BreedingPopulation	61.62	16.48	4.05785
SAMEA117850311	H619	P15766-170	BreedingPopulation	65.4	20.93	3.6993
SAMEA117850310	H617	P15766-169	BreedingPopulation	63.53	17.68	4.64331
SAMEA117850309	H615	P15766-168	BreedingPopulation	61.78	16.1	4.25681
SAMEA117850308	H614	P15766-167	BreedingPopulation	64.57	19.17	4.30911
SAMEA117850307	H611	P15766-166	BreedingPopulation	63.57	17.72	4.52901
SAMEA117850306	H604	P15766-165	BreedingPopulation	63.08	15.32	4.55691
SAMEA117850305	H602	P15766-164	BreedingPopulation	64.45	18.17	4.54465
SAMEA117850304	H599	P15766-163	BreedingPopulation	63.53	17.68	4.20161
SAMEA117850303	H596	P15766-162	BreedingPopulation	62.43	16.85	4.64714
SAMEA117850302	H594	P15766-161	BreedingPopulation	63.7	18.37	4.74614
SAMEA117850301	H593	P15766-160	BreedingPopulation	63.8	14.83	4.60147
SAMEA117850300	H589	P15766-159	BreedingPopulation	63.07	15.53	4.70653
SAMEA117850299	H587	P15766-158	BreedingPopulation	63.78	18.1	4.36129
SAMEA117850298	H580	P15766-157	BreedingPopulation	66.82	23.42	4.53564
SAMEA117850297	H579	P15766-156	BreedingPopulation	63.28	15.98	4.45005
SAMEA117850296	H578	P15766-155	BreedingPopulation	63.48	17.67	4.51647
SAMEA117850295	H576	P15766-154	BreedingPopulation	64.18	19.83	4.37623
SAMEA117850294	H575	P15766-153	BreedingPopulation	66.02	22.63	4.83358
SAMEA117850293	H572	P15766-152	BreedingPopulation	61.62	16.48	4.31847
SAMEA117850292	H569	P15766-151	BreedingPopulation	63.53	17.68	4.66897
SAMEA117850291	H568	P15766-150	BreedingPopulation	64.18	20.05	4.71938
SAMEA117850290	H567	P15766-149	BreedingPopulation	63.47	15.5	4.67628
SAMEA117850289	H562	P15766-148	BreedingPopulation	62.63	15.05	4.59544
SAMEA117850288	H559	P15766-147	BreedingPopulation	63.5	13.82	4.55584
SAMEA117850287	H556	P15766-146	BreedingPopulation	63.63	15.08	4.64216
SAMEA117850286	H555	P15766-145	BreedingPopulation	63.82	17.78	4.62914
SAMEA117850285	H554	P15766-144	BreedingPopulation	63.81	16.4	4.58592
SAMEA117850284	H553	P15766-143	BreedingPopulation	63.7	18.37	4.34155
SAMEA117850283	H543	P15766-142	BreedingPopulation	63.83	17.77	4.58484
SAMEA117850282	H541	P15766-141	BreedingPopulation	64.18	19.85	4.86246
SAMEA117850281	H540	P15766-140	BreedingPopulation	63.53	17.5	4.53583
SAMEA117850280	H539	P15766-139	BreedingPopulation	62.63	15.05	4.26802
SAMEA117850279	H538	P15766-138	BreedingPopulation	65.4	20.93	4.47459
SAMEA117850278	H535	P15766-137	BreedingPopulation	63.48	17.67	4.86363
SAMEA117850277	H534	P15766-136	BreedingPopulation	61.6	16.52	4.35923
SAMEA117850276	H528	P15766-135	BreedingPopulation	64.45	18.17	5.31504
SAMEA117850275	H526	P15766-134	BreedingPopulation	66.02	22.63	4.55779
SAMEA117850274	H525	P15766-133	BreedingPopulation	66.68	22.65	4.18992
SAMEA117850273	H524	P15766-132	BreedingPopulation	62.47	16.75	4.47518
SAMEA117850272	H523	P15766-131	BreedingPopulation	61.62	16.48	4.25572
SAMEA117850271	H519	P15766-130	BreedingPopulation	63.5	13.82	4.65102
SAMEA117850270	H517	P15766-129	BreedingPopulation	62.47	16.75	4.39482
SAMEA117850269	H515	P15766-128	BreedingPopulation	64.3	17.4	4.51493
SAMEA117850268	H514	P15766-127	BreedingPopulation	63.7	18.37	4.54628
SAMEA117850267	H512	P15766-126	BreedingPopulation	61.78	16.1	4.48623
SAMEA117850266	H508	P15766-125	BreedingPopulation	63.48	17.67	4.91142
SAMEA117850265	H507	P15766-124	BreedingPopulation	62.92	17.33	4.19703
SAMEA117850264	H504	P15766-123	BreedingPopulation	63.82	17.78	4.76115
SAMEA117850263	H503	P15766-122	BreedingPopulation	62.43	16.85	4.00343
SAMEA117850262	H502	P15766-121	BreedingPopulation	64.28	14.93	4.70545
SAMEA117850261	H501	P15766-120	BreedingPopulation	62.9	17.48	4.52406
SAMEA117850260	H499	P15766-119	BreedingPopulation	64.58	15.87	4.8888
SAMEA117850259	H495	P15766-118	BreedingPopulation	63.47	15.5	4.34529
SAMEA117850258	H493	P15766-117	BreedingPopulation	64.18	19.83	4.39973
SAMEA117850257	H482	P15766-116	BreedingPopulation	63.03	15.58	4.70828
SAMEA117850256	H481	P15766-115	BreedingPopulation	62.92	17.5	4.48397
SAMEA117850255	H478	P15766-114	BreedingPopulation	63.25	17.65	4.83641
SAMEA117850254	H442	P15766-113	BreedingPopulation	63.7	18.37	4.46753
SAMEA117850253	H421	P15766-112	BreedingPopulation	63.37	14.23	4.68944
SAMEA117850252	H395	P15766-111	BreedingPopulation	61.6	16.52	4.47258
SAMEA117850251	H391	P15766-110	BreedingPopulation	63.37	14.25	4.52104
SAMEA117850250	H386	P15766-109	BreedingPopulation	63.53	17.5	4.87927
SAMEA117850249	H362	P15766-108	BreedingPopulation	62.92	17.33	4.42061
SAMEA117850248	H358	P15766-107	BreedingPopulation	61.95	16.38	4.86774
SAMEA117850247	H327	P15766-106	BreedingPopulation	63.83	17.77	4.51147
SAMEA117850246	H324	P15766-105	BreedingPopulation	63.48	17.67	4.25756
SAMEA117850245	H299	P15766-104	BreedingPopulation	64.18	20.05	4.5167
SAMEA117850244	H284	P15766-103	BreedingPopulation	61.62	16.48	4.15706
SAMEA117850243	H266	P15766-102	BreedingPopulation	64.28	17.4	4.65509
SAMEA117850242	H263	P15766-101	BreedingPopulation	62.88	16.58	4.98631
SAMEA117850241	H849	P15502-296	BreedingPopulation	63.57	17.72	7.17526
SAMEA117850240	H690	P15502-294	BreedingPopulation	63.07	15.53	6.57611
SAMEA117850239	H366	P15502-293	BreedingPopulation	63.48	17.67	6.87283
SAMEA117850238	H473	P15502-291	BreedingPopulation	63.25	17.65	7.02432
SAMEA117850237	H254	P15502-290	BreedingPopulation	65.4	20.93	7.73481
SAMEA117850236	H426	P15502-289	BreedingPopulation	63.57	17.72	6.65324
SAMEA117850235	H1004	P15502-288	BreedingPopulation	63.48	17.67	6.78283
SAMEA117850234	H373	P15502-287	BreedingPopulation	63.58	18.12	6.72179
SAMEA117850233	H361	P15502-286	BreedingPopulation	62.43	16.85	6.99005
SAMEA117850232	H933	P15502-285	BreedingPopulation	63.7	18.37	6.79815
SAMEA117850231	H797	P15502-284	BreedingPopulation	63.37	14.23	6.96439
SAMEA117850230	H431	P15502-283	BreedingPopulation	64.18	19.83	6.90113
SAMEA117850229	H305	P15502-282	BreedingPopulation	63.53	17.68	7.39489
SAMEA117850228	H307	P15502-281	BreedingPopulation	64.18	19.85	6.60144
SAMEA117850227	H374	P15502-280	BreedingPopulation	64.52	20.8	7.48332
SAMEA117850226	H703	P15502-279	BreedingPopulation	62.47	16.75	7.06316
SAMEA117850225	H453	P15502-278	BreedingPopulation	64.22	20.12	6.85987
SAMEA117850224	H710	P15502-277	BreedingPopulation	64.22	20.12	6.85889
SAMEA117850223	H942	P15502-276	BreedingPopulation	62.88	16.58	6.91917
SAMEA117850222	H292	P15502-275	BreedingPopulation	66.38	20.75	6.75148
SAMEA117850221	H264	P15502-274	BreedingPopulation	65.1	20.55	7.32655
SAMEA117850220	H274	P15502-273	BreedingPopulation	63.47	15.5	6.78029
SAMEA117850219	H465	P15502-272	BreedingPopulation	61.95	16.28	6.86869
SAMEA117850218	H699	P15502-271	BreedingPopulation	64.52	20.8	7.04261
SAMEA117850217	H697	P15502-270	BreedingPopulation	62.92	17.67	7.07566
SAMEA117850216	H931	P15502-269	BreedingPopulation	62.05	15.48	6.88757
SAMEA117850215	H246	P15502-268	BreedingPopulation	61.95	16.38	7.37551
SAMEA117850214	H743	P15502-267	BreedingPopulation	64.52	20.8	6.96023
SAMEA117850213	H413	P15502-266	BreedingPopulation	64.18	19.85	7.4341
SAMEA117850212	H244	P15502-265	BreedingPopulation	63.03	15.58	7.12292
SAMEA117850211	H436	P15502-264	BreedingPopulation	61.78	16.1	6.86495
SAMEA117850210	H987	P15502-263	BreedingPopulation	63.47	15.5	7.23804
SAMEA117850209	H430	P15502-262	BreedingPopulation	66.02	22.63	8.00015
SAMEA117850208	H420	P15502-261	BreedingPopulation	63.83	17.77	7.08464
SAMEA117850207	H695	P15502-260	BreedingPopulation	63.5	13.82	7.0504
SAMEA117850206	H367	P15502-259	BreedingPopulation	64.18	20.05	6.90311
SAMEA117850205	H251	P15502-258	BreedingPopulation	62.05	15.48	7.27309
SAMEA117850204	H300	P15502-257	BreedingPopulation	61.78	16.1	6.72133
SAMEA117850203	H689	P15502-256	BreedingPopulation	62.9	17.48	6.94494
SAMEA117850202	H410	P15502-255	BreedingPopulation	64.18	19.83	7.30891
SAMEA117850201	H368	P15502-254	BreedingPopulation	63.53	17.5	7.32283
SAMEA117850200	H470	P15502-253	BreedingPopulation	63.47	15.5	7.03849
SAMEA117850199	H302	P15502-252	BreedingPopulation	63.7	16.92	7.45223
SAMEA117850198	H800	P15502-251	BreedingPopulation	63.83	17.77	7.01084
SAMEA117850197	H303	P15502-250	BreedingPopulation	64.5	17.35	7.99631
SAMEA117850196	H669	P15502-249	BreedingPopulation	64.52	20.8	6.77687
SAMEA117850195	H236	P15502-248	BreedingPopulation	61.95	16.28	6.85755
SAMEA117850194	H399	P15502-247	BreedingPopulation	63.07	15.53	6.79866
SAMEA117850193	H708	P15502-246	BreedingPopulation	63.47	15.5	7.06773
SAMEA117850192	H343	P15502-245	BreedingPopulation	62.92	17.83	6.98002
SAMEA117850191	H339	P15502-244	BreedingPopulation	62.63	15.05	7.03991
SAMEA117850190	H239	P15502-242	BreedingPopulation	62.47	16.75	8.02464
SAMEA117850189	H234	P15502-241	BreedingPopulation	63.7	18.37	7.64101
SAMEA117850188	H670	P15502-240	BreedingPopulation	66.82	23.42	6.79088
SAMEA117850187	H769	P15502-239	BreedingPopulation	63.28	15.98	7.64743
SAMEA117850186	H469	P15502-238	BreedingPopulation	62.92	17.33	7.25834
SAMEA117850185	H375	P15502-237	BreedingPopulation	62.47	16.75	7.08039
SAMEA117850184	H468	P15502-236	BreedingPopulation	63.57	17.72	7.12524
SAMEA117850183	H432	P15502-235	BreedingPopulation	62.63	15.05	6.97805
SAMEA117850182	H355	P15502-234	BreedingPopulation	66.68	22.65	6.96186
SAMEA117850181	H278	P15502-233	BreedingPopulation	63.98	16.9	7.37325
SAMEA117850180	H293	P15502-232	BreedingPopulation	64.73	21.03	6.80484
SAMEA117850179	H1191	P15502-231	BreedingPopulation	65.22	16.47	7.22857
SAMEA117850178	H215	P15502-230	BreedingPopulation	65.1	20.55	6.99421
SAMEA117850177	H360	P15502-229	BreedingPopulation	63.7	16.92	7.18042
SAMEA117850176	H356	P15502-228	BreedingPopulation	64.18	20.05	7.05635
SAMEA117850175	H741	P15502-227	BreedingPopulation	66.35	21.5	7.70882
SAMEA117850174	H889	P15502-226	BreedingPopulation	63.25	17.65	6.95763
SAMEA117850173	H277	P15502-225	BreedingPopulation	64.57	19.17	7.5121
SAMEA117850172	H677	P15502-224	BreedingPopulation	63.15	14.55	6.75677
SAMEA117850171	H893	P15502-222	BreedingPopulation	64.45	18.17	6.75636
SAMEA117850170	H456	P15502-221	BreedingPopulation	64.33	20.33	7.3745
SAMEA117850169	H335	P15502-220	BreedingPopulation	63.63	15.08	7.12504
SAMEA117850168	H248	P15502-219	BreedingPopulation	66.33	21.3	7.61242
SAMEA117850167	H247	P15502-218	BreedingPopulation	66.6	23.07	6.72478
SAMEA117850166	H273	P15502-217	BreedingPopulation	62.45	15.85	6.9599
SAMEA117850165	H479	P15502-216	BreedingPopulation	63.7	16.92	7.23261
SAMEA117850164	H496	P15502-215	BreedingPopulation	64.28	17.4	6.79933
SAMEA117850163	H225	P15502-214	BreedingPopulation	62.63	15.05	7.07738
SAMEA117850162	H441	P15502-213	BreedingPopulation	62.05	15.48	6.55351
SAMEA117850161	H332	P15502-212	BreedingPopulation	64.45	18.17	6.85802
SAMEA117850160	H886	P15502-211	BreedingPopulation	63.63	14.43	6.9379
SAMEA117850159	H434	P15502-210	BreedingPopulation	62.63	15.05	7.03493
SAMEA117850158	H320	P15502-209	BreedingPopulation	63.07	15.53	7.17528
SAMEA117850157	H764	P15502-208	BreedingPopulation	62.43	16.85	6.74595
SAMEA117850156	H902	P15502-207	BreedingPopulation	63.08	15.32	6.71536
SAMEA117850155	H480	P15502-206	BreedingPopulation	61.95	16.38	7.12286
SAMEA117850154	H461	P15502-205	BreedingPopulation	61.78	16.1	7.1371
SAMEA117850153	H887	P15502-204	BreedingPopulation	63.08	15.32	6.94215
SAMEA117850152	H440	P15502-203	BreedingPopulation	63.57	17.72	7.96623
SAMEA117850151	H322	P15502-202	BreedingPopulation	63.48	17.67	7.04379
SAMEA117850150	H227	P15502-201	BreedingPopulation	61.6	16.52	7.01044
SAMEA117850149	H235	P15502-196	BreedingPopulation	63.75	16.6	7.61189
SAMEA117850148	H661	P15502-195	BreedingPopulation	63.78	18.1	7.8642
SAMEA117850147	H709	P15502-194	BreedingPopulation	62.63	15.05	7.83757
SAMEA117850146	H660	P15502-193	BreedingPopulation	63.37	14.25	7.73606
SAMEA117850145	H488	P15502-192	BreedingPopulation	62.63	15.05	7.49728
SAMEA117850144	H422	P15502-191	BreedingPopulation	63.83	17.55	7.49572
SAMEA117850143	H258	P15502-190	BreedingPopulation	64.33	20.33	7.59479
SAMEA117850142	H730	P15502-189	BreedingPopulation	62.43	16.85	7.59961
SAMEA117850141	H423	P15502-188	BreedingPopulation	63.53	17.5	7.68829
SAMEA117850140	H654	P15502-187	BreedingPopulation	61.95	16.28	7.70519
SAMEA117850139	H666	P15502-186	BreedingPopulation	61.6	16.52	7.51154
SAMEA117850138	H351	P15502-185	BreedingPopulation	63.25	17.65	7.70341
SAMEA117850137	H722	P15502-184	BreedingPopulation	63.5	13.82	7.70575
SAMEA117850136	H869	P15502-183	BreedingPopulation	63.48	17.67	7.79733
SAMEA117850135	H459	P15502-182	BreedingPopulation	64.18	19.58	7.5562
SAMEA117850134	H252	P15502-181	BreedingPopulation	62.87	15	7.3727
SAMEA117850133	H296	P15502-180	BreedingPopulation	62.63	15.05	7.70497
SAMEA117850132	H429	P15502-179	BreedingPopulation	64.18	19.85	7.5972
SAMEA117850131	H901	P15502-178	BreedingPopulation	62.9	17.48	7.67173
SAMEA117850130	H306	P15502-177	BreedingPopulation	63.57	17.72	8.00499
SAMEA117850129	H965	P15502-176	BreedingPopulation	63.63	15.08	7.82797
SAMEA117850128	H346	P15502-175	BreedingPopulation	63.53	17.68	7.81011
SAMEA117850127	H344	P15502-174	BreedingPopulation	61.62	16.48	7.6152
SAMEA117850126	H835	P15502-173	BreedingPopulation	63.47	15.5	7.96742
SAMEA117850125	H445	P15502-172	BreedingPopulation	63.75	16.6	7.60601
SAMEA117850124	H425	P15502-171	BreedingPopulation	64.22	20.12	7.54133
SAMEA117850123	H879	P15502-170	BreedingPopulation	62.45	15.85	7.71908
SAMEA117850122	H1034	P15502-169	BreedingPopulation	63.82	17.62	7.62193
SAMEA117850121	H241	P15502-168	BreedingPopulation	66.38	20.75	7.76411
SAMEA117850120	H574	P15502-167	BreedingPopulation	61.78	16.1	7.85311
SAMEA117850119	H304	P15502-166	BreedingPopulation	62.63	15.05	7.61087
SAMEA117850118	H683	P15502-165	BreedingPopulation	62.43	16.85	8.04342
SAMEA117850117	H243	P15502-164	BreedingPopulation	63.8	14.83	7.72817
SAMEA117850116	H259	P15502-163	BreedingPopulation	66.82	23.42	7.52664
SAMEA117850115	H707	P15502-162	BreedingPopulation	63.5	16.65	7.67729
SAMEA117850114	H1033	P15502-161	BreedingPopulation	64.28	17.4	7.73161
SAMEA117850113	H1037	P15502-160	BreedingPopulation	64.18	19.58	7.55328
SAMEA117850112	H896	P15502-159	BreedingPopulation	63.2	17.15	7.90011
SAMEA117850111	H454	P15502-158	BreedingPopulation	63.78	18.1	8.10487
SAMEA117850110	H330	P15502-157	BreedingPopulation	66.68	22.65	7.74079
SAMEA117850109	H457	P15502-156	BreedingPopulation	64.15	18.67	7.89463
SAMEA117850108	H500	P15502-155	BreedingPopulation	64.18	20.05	7.97709
SAMEA117850107	H748	P15502-154	BreedingPopulation	63.48	17.67	7.61434
SAMEA117850106	H313	P15502-153	BreedingPopulation	64.73	21.03	7.77258
SAMEA117850105	H451	P15502-152	BreedingPopulation	63.83	17.77	7.87187
SAMEA117850104	H490	P15502-151	BreedingPopulation	63.58	18.12	7.61714
SAMEA117850103	H428	P15502-150	BreedingPopulation	63.28	15.98	8.16689
SAMEA117850102	H268	P15502-149	BreedingPopulation	62.88	16.58	8.73416
SAMEA117850101	H315	P15502-148	BreedingPopulation	63.7	18.37	8.14665
SAMEA117850100	H497	P15502-147	BreedingPopulation	64.18	19.85	7.54961
SAMEA117850099	H308	P15502-146	BreedingPopulation	63.2	17.15	8.46927
SAMEA117850098	H688	P15502-145	BreedingPopulation	63.82	17.57	8.32954
SAMEA117850097	H686	P15502-144	BreedingPopulation	62.05	15.48	8.02715
SAMEA117850096	H729	P15502-143	BreedingPopulation	64.67	16.6	7.85688
SAMEA117850095	H383	P15502-142	BreedingPopulation	66.68	22.65	7.61606
SAMEA117850094	H245	P15502-141	BreedingPopulation	62.43	16.85	7.49037
SAMEA117850093	H718	P15502-140	BreedingPopulation	63.7	18.37	8.47573
SAMEA117850092	H238	P15502-139	BreedingPopulation	61.95	16.28	9.66829
SAMEA117850091	H276	P15502-138	BreedingPopulation	61	13.3	7.42022
SAMEA117850090	H664	P15502-137	BreedingPopulation	66.02	22.63	7.47274
SAMEA117850089	H467	P15502-136	BreedingPopulation	63.88	18.27	8.21166
SAMEA117850088	H345	P15502-135	BreedingPopulation	63.58	18.12	7.92386
SAMEA117850087	H693	P15502-134	BreedingPopulation	66.73	21.63	7.77689
SAMEA117850086	H257	P15502-133	BreedingPopulation	60.33	17.55	7.59766
SAMEA117850085	H738	P15502-132	BreedingPopulation	63.08	15.32	7.85412
SAMEA117850084	H439	P15502-131	BreedingPopulation	61.6	16.52	7.4028
SAMEA117850083	H347	P15502-130	BreedingPopulation	63.03	15.58	7.59717
SAMEA117850082	H673	P15502-129	BreedingPopulation	63.82	17.78	7.78464
SAMEA117850081	H711	P15502-128	BreedingPopulation	63.85	14.33	7.72341
SAMEA117850080	H294	P15502-127	BreedingPopulation	62.63	15.05	7.7526
SAMEA117850079	H272	P15502-126	BreedingPopulation	64.22	20.12	7.58531
SAMEA117850078	H333	P15502-125	BreedingPopulation	62.43	16.85	7.92234
SAMEA117850077	H704	P15502-124	BreedingPopulation	64.3	17.4	7.65399
SAMEA117850076	H458	P15502-122	BreedingPopulation	62.88	16.58	7.49446
SAMEA117850075	H712	P15502-121	BreedingPopulation	63.53	17.68	7.74442
SAMEA117850074	H667	P15502-120	BreedingPopulation	63.37	14.25	7.77702
SAMEA117850073	H233	P15502-119	BreedingPopulation	66.38	20.75	7.65967
SAMEA117850072	H466	P15502-118	BreedingPopulation	64.52	20.8	7.44131
SAMEA117850071	H331	P15502-117	BreedingPopulation	64.18	19.83	7.06483
SAMEA117850070	H485	P15502-116	BreedingPopulation	63.7	16.92	7.43649
SAMEA117850069	H744	P15502-115	BreedingPopulation	64.48	14.08	15.025
SAMEA117850068	H275	P15502-114	BreedingPopulation	63.53	17.68	7.47552
SAMEA117850067	H348	P15502-113	BreedingPopulation	66.02	22.63	7.60995
SAMEA117850066	H736	P15502-112	BreedingPopulation	62.63	15.05	7.45555
SAMEA117850065	H295	P15502-111	BreedingPopulation	65.4	20.93	7.40067
SAMEA117850064	H337	P15502-110	BreedingPopulation	63.57	17.72	14.988
SAMEA117850063	H250	P15502-109	BreedingPopulation	62.05	15.48	7.51666
SAMEA117850062	H334	P15502-105	BreedingPopulation	63.2	17.15	15.2515
SAMEA117850061	H297	P15502-104	BreedingPopulation	62.45	15.85	14.8427
SAMEA117850060	H349	P15502-103	BreedingPopulation	64.73	21.03	13.7788
SAMEA117850059	H338	P15502-102	BreedingPopulation	64.73	21.03	14.6362
SAMEA117850058	H271	P15502-101	BreedingPopulation	62.63	15.05	7.66029
